# Supplementary material for: The Thousand Polish Genomes—A Database of Polish Variant Allele Frequencies
Source: Int J Mol Sci. 2022 Apr 20;23(9):4532. doi: 10.3390/ijms23094532 (PMC9104289; doi:10.3390/ijms23094532)
Supplement: Supplementary file 1 [file ijms-23-04532-s001.zip › Supplemental Tables S6-S7.xlsx]

## Sheet: S6
Supplemental table S6: Cumulative frequencies of rare (gnomAD_AF < 0.01), nonysnonymous (VEP IMPACT='HIGH' or 'MODERATE'), pathogenic or likely pathogenic ClinVar variants as well as putative LoF SV variants in POL and NFE populations in genes associated with Autosomal Recessive disorders
Symbol	POL_number_unique_variants	POL_SNP_cum_AF	POL_SNP_cum_AC	POL_SNP_cum_AN	gnomAD_NFE_number_unique_variants	gnomAD_NFE_SNP_cum_AF	gnomAD_NFE_SNP_cum_AN	gnomAD_NFE_SNP_cum_AC	cum_AF_fold_change	fisher_p	fisher_p_corr	fisher_q	gnomAD SV deletion cum. AF	gnomAD SV duplication cum. AF	gnomAD SV inversion cum. AF	gnomAD SV total cum. AF	POL SV deletion cum. AF	POL SV duplication cum. AF	POL SV inversion cum. AF	POL SV total cum. AF	min(mean_depth)	avg(mean_depth)	max(mean_depth)	min(pct10x)	avg(pct10x)	max(pct10x)	min(pct20x)	avg(pct20x)	max(pct20x)	FILTER
AAAS	1	0.000464684	1	2152	12	0.0007278439	64598	47	-0.647379099317338	1	1843	1	0	0	0	0	0.00557621	0	0	0.00557621	38.99	38.9900016784668	38.99	100	100	100	100	100	100	PASS
AARS1	0	0	0	2152	1	0.0000154895	64598	1	0	1	1843	1	0	0	0	0	0.016263948	0.000464684	0	0.016728632	37.33	37.3300018310547	37.33	100	100	100	100	100	100	PASS
AARS2	0	0	0	0	0	0	0	0	0	0	0	1	0.000142	0	0	0.000142	0.000464684	0	0	0.000464684	36.77	36.7700004577637	36.77	100	100	100	100	100	100	PASS
AASS	0	0	0	2152	2	0.0001238995	64598	8	0	1	1843	1	0.000262	0	0	0.000262	0.000929368	0	0	0.000929368	35.84	35.8400001525879	35.84	100	100	100	99.68	99.6800003051758	99.68	PASS
ABAT	0	0	0	2152	2	0.0000309746	64598	2	0	1	1843	1	0.004067	0	0	0.004067	0	0	0	0	34.3	34.2999992370606	34.3	100	100	100	97.88	97.879997253418	97.88	PASS
ABCA1	1	0.00139405	3	2152	6	0.0007636902	64598	49	0.868222891202967	0.235107328065116	433.302805624009	1	0.00276	0	0	0.00276	0.001394052	0	0	0.001394052	36.27	36.2700004577637	36.27	100	100	100	98.58	98.5800018310547	98.58	PASS
ABCA12	0	0	0	2152	8	0.0002014595	64598	13	0	1	1843	1	0.008407	0.001574	0	0.009981	0.00325279	0	0.00139405	0.00464684	35.4	35.4000015258789	35.4	100	100	100	99.62	99.620002746582	99.62	PASS
ABCA3	1	0.00232342	5	2152	7	0.0051104809	64598	330	-1.13720908538543	0.08525264201564	157.120619234824	1	0.000525	0.000131	0	0.000656	0.000464684	0	0	0.000464684	40.21	40.2099990844727	40.21	100	100	100	100	100	100	PASS
ABCA4	11	0.008364746	18	2152	106	0.0083362491	64598	539	0.00492334450295424	0.90444434911065	1666.89093541093	1	0.000262	0.000131	0	0.000393	0	0	0	0	36.01	36.0099983215332	36.01	100	100	100	99.58	99.5800018310547	99.58	PASS
ABCA5	0	0	0	2152	1	0.000015489	64598	1	0	1	1843	1	0.000131	0	0	0.000131	0	0	0	0	37.06	37.060001373291	37.06	100	100	100	99.89	99.8899993896485	99.89	PASS
ABCB11	5	0.003253218	7	2152	12	0.0004028471	64598	26	3.01356322637774	0.000073296661628005	0.135085747380413	0.00675428736902066	0.000262	0	0	0.000262	0.00325279	0	0	0.00325279	34.73	34.7299995422363	34.73	100	100	100	99.85	99.8499984741211	99.85	PASS
ABCB4	0	0	0	2152	12	0.0003410763	64598	22	0	1	1843	1	0.000393	0	0	0.000393	0.00464684	0.000464684	0	0.005111524	34.33	34.3300018310547	34.33	100	100	100	100	100	100	PASS
ABCC2	2	0.001394052	3	2152	17	0.0015795192	64598	102	-0.180201097351557	1	1843	1	0.000656	0	0	0.000656	0	0	0	0	35.83	35.8300018310547	35.83	100	100	100	99.58	99.5800018310547	99.58	PASS
ABCC6	5	0.004646836	10	2152	61	0.005064899	64598	327	-0.124284771335483	1	1843	1	0.000524	0.000131	0	0.000655	0	0	0	0	36.84	36.8400001525879	36.84	100	100	100	99.57	99.5699996948242	99.57	PASS
ABCD3	0	0	0	0	0	0	0	0	0	0	0	1	0.000393	0	0	0.000393	0	0	0	0	34.65	34.6500015258789	34.65	100	100	100	100	100	100	PASS
ABCD4	0	0	0	2152	4	0.0001084026	64598	7	0	1	1843	1	0.000135	0.000131	0	0.000266	0.01115241	0	0	0.01115241	36.79	36.7900009155273	36.79	100	100	100	99.3	99.3000030517578	99.3	PASS
ABCG5	0	0	0	0	0	0	0	0	0	0	0	1	0	0	0	0	0	0	0	0	35.06	35.060001373291	35.06	100	100	100	100	100	100	PASS
ABCG8	2	0.000929368	2	2152	8	0.001486485	64598	96	-0.677583029260727	0.773257585937407	1425.11373088264	1	0	0	0	0	0.009293684	0.001394052	0	0.010687736	37.48	37.4799995422363	37.48	100	100	100	100	100	100	PASS
ABHD12	0	0	0	2152	3	0.0000619579	64598	4	0	1	1843	1	0.000131	0	0	0.000131	0.001858736	0	0	0.001858736	40.84	40.8400001525879	40.84	100	100	100	100	100	100	PASS
ABHD5	0	0	0	2152	3	0.0000619867	64598	4	0	1	1843	1	0	0	0	0	0.007899624	0	0	0.007899624	38.1	38.0999984741211	38.1	100	100	100	100	100	100	PASS
ACACA	1	0.0107577	23	2152	1	0.00726212	64598	469	0.566906987476328	0.0722265377577211	133.11350908748	1	0.003543	0.000395	0	0.003938	0.004646842	0	0	0.004646842	36.78	36.7799987792969	36.78	100	100	100	100	100	100	PASS
ACAD8	0	0	0	2152	1	0.0000774329	64598	5	0	1	1843	1	0	0	0	0	0	0	0	0	33.18	33.1800003051758	33.18	100	100	100	100	100	100	PASS
ACAD9	0	0	0	2152	14	0.0005884467	64598	38	0	0.635514997973828	1171.25414126577	1	0.000655	0	0	0.000655	0.012081784	0	0	0.012081784	40.14	40.1399993896484	40.14	100	100	100	100	100	100	PASS
ACADM	5	0.00232342	5	2152	25	0.0021063801	64598	136	0.141484174109181	0.808505040298464	1490.07478927007	1	0	0	0	0	0	0	0	0	36.04	36.0400009155273	36.04	100	100	100	100	100	100	PASS
ACADS	0	0	0	2152	8	0.0002943066	64598	19	0	1	1843	1	0	0	0	0	0.000464684	0	0	0.000464684	47.32	47.3199996948242	47.32	100	100	100	100	100	100	PASS
ACADSB	0	0	0	2152	3	0.0000619641	64598	4	0	1	1843	1	0.000131	0	0	0.000131	0	0	0	0	36.87	36.8699989318848	36.87	100	100	100	100	100	100	PASS
ACADVL	0	0	0	2152	34	0.0030364815	64598	196	0	0.00346122830663372	6.37904376912595	0.141756528202799	0	0	0	0	0	0	0	0	38.4	38.4000015258789	38.4	100	100	100	99	99	99	PASS
ACAN	0	0	0	2152	1	0.0000154837	64598	1	0	0	0	NA	0	0.000526	0	0.000526	0	0	0	0	33.91	33.9099998474121	33.91	89.86	89.8600006103516	89.86	85.49	85.4899978637695	85.49	LOW_DP
ACAT1	0	0	0	2152	15	0.000340731	64598	22	0	1	1843	1	0	0	0	0	0	0	0	0	34.84	34.8400001525879	34.84	100	100	100	98.32	98.3199996948242	98.32	PASS
ACBD5	0	0	0	2152	1	0.0000774689	64598	5	0	1	1843	1	0	0.000525	0	0.000525	0	0	0	0	37.75	37.75	37.75	100	100	100	99.15	99.1500015258789	99.15	PASS
ACD	0	0	0	2152	1	0.0000154866	64598	1	0	1	1843	1	0	0	0	0	0	0	0	0	38.82	38.8199996948242	38.82	100	100	100	100	100	100	PASS
ACE	0	0	0	2152	10	0.00077501	64598	50	0	0.412156175557398	759.603831552285	1	0	0	0	0	0	0	0	0	39.64	39.6399993896484	39.64	100	100	100	100	100	100	PASS
ACER3	0	0	0	0	0	0	0	0	0	0	0	1	0.000525	0	0	0.000525	0.000929368	0	0	0.000929368	36.35	36.3499984741211	36.35	100	100	100	99.97	99.9700012207031	99.97	PASS
ACKR1	0	0	0	2152	1	0.0160261	64598	1035	0	0.00000000000000238728604645752	0.00000000000439976818362121	0.00000000000439976818362121	0	0	0	0	0	0	0	0	39.71	39.7099990844727	39.71	100	100	100	100	100	100	PASS
ACO2	0	0	0	2152	3	0.0000464823	64598	3	0	1	1843	1	0	0.000131	0	0.000131	0	0	0	0	38.25	38.25	38.25	100	100	100	100	100	100	PASS
ACOX1	0	0	0	2152	3	0.0000619603	64598	4	0	1	1843	1	0.000525	0	0	0.000525	0.000464684	0	0	0.000464684	38.74	38.7400016784668	38.74	100	100	100	100	100	100	PASS
ACOX2	0	0	0	2152	1	0.0000929109	64598	6	0	1	1843	1	0	0	0	0	0.007899624	0	0	0.007899624	38.32	38.3199996948242	38.32	100	100	100	100	100	100	PASS
ACP2	0	0	0	0	0	0	0	0	0	0	0	1	0	0	0	0	0	0	0.000464684	0.000464684	41.7	41.7000007629395	41.7	100	100	100	100	100	100	PASS
ACP4	0	0	0	2152	3	0.0000464646	64598	3	0	1	1843	1	0	0	0	0	0.000464684	0	0	0.000464684	42.37	42.3699989318848	42.37	100	100	100	100	100	100	PASS
ACP5	0	0	0	2152	3	0.0001239071	64598	8	0	1	1843	1	0	0	0	0	0.00836431	0	0	0.00836431	37.82	37.8199996948242	37.82	100	100	100	99.86	99.8600006103516	99.86	PASS
ACTL6B	0	0	0	2152	4	0.0000619699	64598	4	0	1	1843	1	0	0	0	0	0.00464684	0	0	0.00464684	39.84	39.8400001525879	39.84	100	100	100	100	100	100	PASS
ACY1	0	0	0	2152	3	0.0003562894	64598	23	0	1	1843	1	0	0	0	0	0.007899624	0	0	0.007899624	37.36	37.3600006103516	37.36	100	100	100	100	100	100	PASS
ADA2	3	0.001858736	4	2152	15	0.0012854148	64598	83	0.532087887464278	0.366045189205721	674.621283706144	1	0.000262	0.000393	0	0.000655	0.000464684	0	0	0.000464684	37.83	37.8300018310547	37.83	100	100	100	99.98	99.9800033569336	99.98	PASS
ADAM17	0	0	0	0	0	0	0	0	0	0	0	1	0	0	0	0	0	0.000464684	0	0.000464684	33.35	33.3499984741211	33.35	100	100	100	95.09	95.0899963378906	95.09	PASS
ADAM22	0	0	0	0	0	0	0	0	0	0	0	1	0.001442	0	0	0.001442	0.005111524	0	0	0.005111524	37.62	37.6199989318848	37.62	100	100	100	100	100	100	PASS
ADAM9	0	0	0	2152	2	0.000046177	64598	3	0	1	1843	1	0.000262	0.000132	0	0.000394	0.003252784	0	0	0.003252784	38.56	38.560001373291	38.56	100	100	100	100	100	100	PASS
ADAMTS10	0	0	0	2152	2	0.0000619574	64598	4	0	1	1843	1	0	0	0	0	0.00836431	0	0	0.00836431	39.91	39.9099998474121	39.91	100	100	100	100	100	100	PASS
ADAMTS13	1	0.00139405	3	2152	5	0.0002168362	64598	14	2.68460477237048	0.0162223249692646	29.8977449183547	0.433300650990648	0.000393	0	0	0.000393	0.001858736	0.000464684	0	0.00232342	39.02	39.0200004577637	39.02	100	100	100	100	100	100	PASS
ADAMTS17	0	0	0	2152	1	0.0000309751	64598	2	0	1	1843	1	0.0021	0.000131	0	0.002231	0	0	0	0	40.7	40.7000007629395	40.7	100	100	100	100	100	100	PASS
ADAMTS18	0	0	0	2152	3	0.0003407418	64598	22	0	1	1843	1	0.005639	0	0	0.005639	0.014405208	0	0	0.014405208	36.82	36.8199996948242	36.82	100	100	100	99.7	99.6999969482422	99.7	PASS
ADAMTS2	0	0	0	2152	3	0.0000620419	64598	4	0	1	1843	1	0.004103	0.000131	0	0.004234	0.007434948	0	0	0.007434948	40.87	40.8699989318848	40.87	100	100	100	99.35	99.3499984741211	99.35	PASS
ADAMTS3	0	0	0	2152	1	0.0000154861	64598	1	0	1	1843	1	0.010778	0	0	0.010778	0.008828992	0	0	0.008828992	37.09	37.0900001525879	37.09	100	100	100	100	100	100	PASS
ADAMTSL2	0	0	0	2152	2	0.0000623217	64598	4	0	1	1843	1	0	0	0	0	0.000929368	0	0	0.000929368	42.96	42.9599990844727	42.96	100	100	100	100	100	100	PASS
ADAMTSL4	1	0.000468165	1	2152	7	0.0026044514	64598	168	-2.47589052837115	0.0476143449648725	87.7532377702599	0.790569709641981	0	0	0	0	0	0	0	0	36.04	36.0400009155273	36.04	100	100	100	98.28	98.2799987792969	98.28	PASS
ADAR	0	0	0	2152	2	0.0000464867	64598	3	0	1	1843	1	0.001049	0	0	0.001049	0	0	0	0	34.66	34.6599998474121	34.66	100	100	100	99.46	99.4599990844727	99.46	PASS
ADARB1	0	0	0	0	0	0	0	0	0	0	0	1	0	0.000131	0	0.000131	0	0	0	0	39.82	39.8199996948242	39.82	100	100	100	98.93	98.9300003051758	98.93	PASS
ADAT3	0	0	0	0	0	0	0	0	0	0	0	1	0	0	0	0	0.008828994	0	0	0.008828994	47	47	47	100	100	100	100	100	100	PASS
ADCY1	0	0	0	0	0	0	0	0	0	0	0	1	0.001836	0.000131	0	0.001967	0.006970258	0	0	0.006970258	39.4	39.4000015258789	39.4	100	100	100	100	100	100	PASS
ADCY3	0	0	0	0	0	0	0	0	0	0	0	1	0.000131	0	0	0.000131	0	0	0	0	41.36	41.3600006103516	41.36	100	100	100	100	100	100	PASS
ADCY6	0	0	0	2152	1	0.000015489	64598	1	0	1	1843	1	0	0	0	0	0.00697026	0	0	0.00697026	41.56	41.560001373291	41.56	100	100	100	97.95	97.9499969482422	97.95	PASS
ADD3	0	0	0	2152	1	0.000015489	64598	1	0	1	1843	1	0	0	0	0	0	0	0	0	36.34	36.3400001525879	36.34	100	100	100	100	100	100	PASS
ADGRG1	0	0	0	2152	3	0.0001084036	64598	7	0	1	1843	1	0	0	0	0	0.009293684	0	0	0.009293684	38.97	38.9700012207031	38.97	100	100	100	100	100	100	PASS
ADGRG6	0	0	0	0	0	0	0	0	0	0	0	1	0.006956	0.000131	0	0.007087	0.000464684	0	0	0.000464684	37.48	37.4799995422363	37.48	100	100	100	100	100	100	PASS
ADK	0	0	0	0	0	0	0	0	0	0	0	1	0.002491	0.000394	0	0.002885	0.004646836	0	0	0.004646836	35.29	35.2900009155273	35.29	100	100	100	100	100	100	PASS
ADSL	3	0.001859601	4	2152	12	0.0009136638	64598	59	1.02525780585812	0.145495710497593	268.148594447064	1	0	0	0	0	0	0	0	0	37.32	37.3199996948242	37.32	100	100	100	100	100	100	PASS
ADSS1	0	0	0	2152	5	0.0001084444	64598	7	0	1	1843	1	0.000262	0	0	0.000262	0	0	0	0	35.02	36.1000003814697	37.18	100	100	100	97.47	98.7350006103516	100	PASS
AEBP1	0	0	0	2152	3	0.0000774449	64598	5	0	1	1843	1	0	0	0	0	0.00464684	0	0	0.00464684	36.99	36.9900016784668	36.99	100	100	100	99.83	99.8300018310547	99.83	PASS
AFG3L2	0	0	0	2152	2	0.0000309727	64598	2	0	1	1843	1	0.000131	0	0	0.000131	0	0	0	0	38.27	38.2700004577637	38.27	100	100	100	100	100	100	PASS
AFP	0	0	0	2152	1	0.0000309818	64598	2	0	1	1843	1	0	0	0	0	0.007899624	0	0	0.007899624	34.2	34.2000007629395	34.2	100	100	100	99.22	99.2200012207031	99.22	PASS
AGA	1	0.000464684	1	2152	11	0.0002944276	64598	19	0.658337053111146	0.480823708850821	886.158095412063	1	0.000393	0	0	0.000393	0	0	0	0	35.36	35.3600006103516	35.36	100	100	100	100	100	100	PASS
AGBL5	0	0	0	2152	1	0.0000154875	64598	1	0	1	1843	1	0	0	0	0	0	0	0	0	35.62	35.6199989318848	35.62	100	100	100	96.45	96.4499969482422	96.45	PASS
AGK	0	0	0	2152	5	0.0001394153	64598	9	0	1	1843	1	0.000393	0	0	0.000393	0.00139405	0	0	0.00139405	38.11	38.1100006103516	38.11	100	100	100	100	100	100	PASS
AGL	0	0	0	2152	26	0.0008829933	64598	57	0	0.265898281129845	490.050532122304	1	0.000131	0	0	0.000131	0.000464684	0	0	0.000464684	37.65	37.6500015258789	37.65	100	100	100	100	100	100	PASS
AGPAT2	0	0	0	2152	4	0.0000619583	64598	4	0	1	1843	1	0.000131	0.000131	0	0.000262	0	0	0	0	45.28	45.2799987792969	45.28	100	100	100	100	100	100	PASS
AGPS	0	0	0	2152	1	0.0000155005	64598	1	0	1	1843	1	0.000393	0	0	0.000393	0.00325279	0	0	0.00325279	38.63	38.6300010681152	38.63	100	100	100	100	100	100	PASS
AGRN	1	0.000464684	1	2152	2	0.00015525	64598	10	1.58165670238083	0.302677143275063	557.833975055942	1	0.000131	0	0	0.000131	0	0	0	0	42.38	42.3800010681152	42.38	100	100	100	99.93	99.9300003051758	99.93	PASS
AGTPBP1	0	0	0	2152	1	0.0000154986	64598	1	0	1	1843	1	0.001049	0	0	0.001049	0.001858736	0	0.000929368	0.002788104	37.3	37.2999992370606	37.3	100	100	100	100	100	100	PASS
AGTR1	0	0	0	2152	3	0.0000464574	64598	3	0	1	1843	1	0	0	0	0	0.012081784	0	0	0.012081784	41.02	41.0200004577637	41.02	100	100	100	100	100	100	PASS
AGXT	0	0	0	2152	28	0.0024274356	64598	157	0	0.0108925788235799	20.0750227718578	0.346121082273411	0	0.000131	0	0.000131	0	0	0	0	40.39	40.3899993896484	40.39	100	100	100	100	100	100	PASS
AGXT2	0	0	0	0	0	0	0	0	0	0	0	1	0	0	0	0	0.00929368	0	0	0.00929368	38.43	38.4300003051758	38.43	100	100	100	100	100	100	PASS
AHCY	0	0	0	2152	4	0.0002632535	64598	17	0	1	1843	1	0.000131	0	0	0.000131	0	0	0	0	42.27	42.2700004577637	42.27	100	100	100	100	100	100	PASS
AHI1	0	0	0	2152	23	0.0008370305	64598	54	0	0.42270061300172	779.037229762171	1	0.005116	0	0	0.005116	0.000464684	0.000464684	0	0.000929368	35.39	35.3899993896484	35.39	100	100	100	99.54	99.5400009155274	99.54	PASS
AHR	0	0	0	0	0	0	0	0	0	0	0	1	0	0	0	0	0	0	0	0	35.49	35.4900016784668	35.49	100	100	100	99.1	99.0999984741211	99.1	PASS
AHSG	0	0	0	2152	2	0.0002013928	64598	13	0	1	1843	1	0.000393	0	0	0.000393	0.000464684	0	0	0.000464684	35.75	35.75	35.75	100	100	100	100	100	100	PASS
AICDA	0	0	0	2152	6	0.0001091863	64598	7	0	1	1843	1	0.000265	0	0	0.000265	0.00139405	0	0	0.00139405	33.79	33.7900009155273	33.79	100	100	100	97.16	97.1600036621094	97.16	PASS
AIMP1	0	0	0	2152	1	0.0001239	64598	8	0	1	1843	1	0	0	0	0	0.00139405	0	0	0.00139405	36.8	36.7999992370606	36.8	100	100	100	100	100	100	PASS
AK1	0	0	0	2152	2	0.0000464727	64598	3	0	1	1843	1	0.000131	0	0	0.000131	0.000464684	0	0	0.000464684	46.33	46.3300018310547	46.33	100	100	100	100	100	100	PASS
AK2	0	0	0	2152	3	0.0001084276	64598	7	0	1	1843	1	0.000131	0	0	0.000131	0	0	0	0	31.4	31.3999996185303	31.4	100	100	100	97.54	97.5400009155273	97.54	PASS
AK7	1	0.000929368	2	2152	1	0.00236967	64598	153	-1.35036428760962	0.249878961570746	460.526926174885	1	0	0	0	0	0	0	0	0	39.86	39.8600006103516	39.86	100	100	100	100	100	100	PASS
AKR1C2	0	0	0	2152	1	0.000139379	64598	9	0	1	1843	1	0	0	0	0	0	0	0	0	32.23	32.2299995422363	32.23	100	100	100	100	100	100	PASS
AKR1D1	2	0.000929368	2	2152	3	0.0001086914	64598	7	3.09601217644283	0.0321696983211353	59.2887540058524	0.612554307116105	0	0.000132	0	0.000132	0.000929368	0	0	0.000929368	36.32	36.3199996948242	36.32	100	100	100	99.89	99.8899993896485	99.89	PASS
ALAD	0	0	0	0	0	0	0	0	0	0	0	1	0	0	0	0	0.000464684	0	0	0.000464684	33.42	33.4199981689453	33.42	100	100	100	95.44	95.4400024414062	95.44	PASS
ALDH18A1	0	0	0	2152	3	0.0000619368	64598	4	0	1	1843	1	0	0	0	0	0	0	0	0	38.72	38.7200012207031	38.72	100	100	100	100	100	100	PASS
ALDH1A3	0	0	0	2152	2	0.0000464483	64598	3	0	1	1843	1	0.000271	0	0	0.000271	0	0	0	0	37.05	37.0499992370605	37.05	100	100	100	100	100	100	PASS
ALDH3A2	1	0.000464684	1	2152	10	0.0003562191	64598	23	0.383485096901022	0.54462685666164	1003.7472968274	1	0	0.000131	0	0.000131	0.000929368	0	0	0.000929368	36.9	36.9000015258789	36.9	100	100	100	100	100	100	PASS
ALDH4A1	0	0	0	2152	2	0.000387215	64598	25	0	1	1843	1	0	0	0	0	0	0	0	0	43.51	43.5099983215332	43.51	100	100	100	98.61	98.6100006103516	98.61	PASS
ALDH5A1	0	0	0	2152	12	0.0006507905	64598	42	0	0.646646655602005	1191.7697862745	1	0	0	0	0	0.000464684	0	0	0.000464684	38.92	38.9199981689453	38.92	100	100	100	100	100	100	PASS
ALDH6A1	1	0.000464684	1	2152	1	0.0000309933	64598	2	3.90622169219773	0.0936357732577362	172.570730114008	1	0	0	0	0	0.00743494	0	0	0.00743494	36.19	36.189998626709	36.19	100	100	100	100	100	100	PASS
ALDH7A1	1	0.000929368	2	2152	14	0.0008989302	64598	58	0.0480408729103608	0.720194958966795	1327.3193093758	1	0	0.000131	0	0.000131	0.010687734	0	0	0.010687734	34.74	34.7400016784668	34.74	100	100	100	99.9	99.9000015258789	99.9	PASS
ALDOA	0	0	0	0	0	0	0	0	0	0	0	1	0.000139	0	0	0.000139	0.008829	0	0	0.008829	41.08	41.0800018310547	41.08	100	100	100	100	100	100	PASS
ALDOB	5	0.008828992	19	2152	16	0.0063811901	64598	412	0.468423222237869	0.168996815777776	311.461131478441	1	0	0	0	0	0.002323418	0	0	0.002323418	31.72	31.7199993133545	31.72	100	100	100	96.95	96.9499969482422	96.95	PASS
ALG1	1	0.000464684	1	2152	10	0.0008208514	64598	53	-0.820871101496737	1	1843	1	0.000919	0	0	0.000919	0	0	0	0	37.24	37.2400016784668	37.24	100	100	100	100	100	100	PASS
ALG12	1	0.000929368	2	2152	5	0.0004646467	64598	30	1.0001158092056	0.276050523663517	508.761115111862	1	0.000525	0	0	0.000525	0.00975836	0	0	0.00975836	43.84	43.8400001525879	43.84	100	100	100	100	100	100	PASS
ALG14	0	0	0	2152	1	0.0000774377	64598	5	0	1	1843	1	0	0	0	0	0.001394052	0	0	0.001394052	33.22	33.2200012207031	33.22	100	100	100	99.15	99.1500015258789	99.15	PASS
ALG2	0	0	0	2152	2	0.000263302	64598	17	0	1	1843	1	0	0	0	0	0.000464684	0	0	0.000464684	36.75	36.75	36.75	100	100	100	100	100	100	PASS
ALG3	0	0	0	2152	4	0.0001239109	64598	8	0	1	1843	1	0.001442	0	0	0.001442	0.004646844	0	0	0.004646844	38.51	38.5099983215332	38.51	100	100	100	100	100	100	PASS
ALG6	0	0	0	2152	12	0.0004034494	64598	26	0	1	1843	1	0.001049	0.000131	0	0.00118	0	0	0	0	34.51	34.5099983215332	34.51	100	100	100	100	100	100	PASS
ALG8	0	0	0	2152	8	0.0004027875	64598	26	0	1	1843	1	0	0	0	0	0	0	0	0	39.61	39.6100006103516	39.61	100	100	100	100	100	100	PASS
ALG9	0	0	0	2152	1	0.0000464727	64598	3	0	1	1843	1	0	0	0	0	0	0	0.000464684	0.000464684	35.57	35.5699996948242	35.57	100	100	100	100	100	100	PASS
ALKBH8	0	0	0	2152	1	0.0000309828	64598	2	0	1	1843	1	0.000262	0	0	0.000262	0	0	0	0	37.27	37.2700004577637	37.27	100	100	100	100	100	100	PASS
ALMS1	1	0.000464684	1	2152	30	0.0010239202	64598	66	-1.139781406244	0.726801930814563	1339.49595849124	1	0.000918	0.000131	0	0.001049	0.005576206	0	0	0.005576206	34.75	34.75	34.75	100	100	100	99.95	99.9499969482422	99.95	PASS
ALOX12B	2	0.00511153	11	2152	30	0.0009913307	64598	64	2.36631687368346	0.0000280360802084762	0.0516704958242217	0.00397465352494013	0	0	0	0	0	0	0	0	41.5	41.5	41.5	100	100	100	100	100	100	PASS
ALOXE3	2	0.003717474	8	2152	9	0.0024316488	64598	157	0.612387774925242	0.26149099596502	481.927905563533	1	0	0.000131	0	0.000131	0	0	0	0	37.64	37.6399993896484	37.64	100	100	100	99.94	99.9400024414063	99.94	PASS
ALPK3	0	0	0	2152	5	0.0001393941	64598	9	0	1	1843	1	0.000131	0	0	0.000131	0	0	0	0	39.46	39.4599990844727	39.46	100	100	100	99.92	99.9199981689453	99.92	PASS
ALPL	1	0.0027881	6	2152	28	0.0026023454	64598	168	0.0994698483537516	0.82798378286759	1525.97411182497	1	0	0	0	0	0	0	0	0	40.37	40.3699989318848	40.37	100	100	100	96.81	96.8099975585938	96.81	PASS
ALS2	0	0	0	2152	9	0.0001858495	64598	12	0	1	1843	1	0	0	0	0	0	0	0	0	36.25	36.25	36.25	100	100	100	99.16	99.1600036621094	99.16	PASS
ALX1	0	0	0	0	0	0	0	0	0	0	0	1	0	0	0	0	0.00557621	0	0	0.00557621	35.42	35.4199981689453	35.42	100	100	100	99.07	99.0699996948242	99.07	PASS
ALX3	0	0	0	2152	1	0.0000464583	64598	3	0	1	1843	1	0	0	0	0	0	0	0	0	43.09	43.0900001525879	43.09	100	100	100	100	100	100	PASS
ALX4	0	0	0	0	0	0	0	0	0	0	0	1	0	0	0	0	0.000929368	0	0	0.000929368	42.27	42.2700004577637	42.27	100	100	100	100	100	100	PASS
AMACR	0	0	0	2152	1	0.000805702	64598	52	0	0.416925861446651	768.394362646177	1	0	0	0	0	0.00929368	0	0	0.00929368	37.5	37.5	37.5	100	100	100	100	100	100	PASS
AMBN	0	0	0	2152	1	0.000154986	64598	10	0	1	1843	1	0	0	0	0	0.007899624	0	0	0.007899624	37.57	37.5699996948242	37.57	100	100	100	100	100	100	PASS
AMH	0	0	0	2152	1	0.0000309866	64598	2	0	1	1843	1	0	0	0	0	0.00836431	0	0	0.00836431	46.78	46.7799987792969	46.78	100	100	100	100	100	100	PASS
AMHR2	0	0	0	2152	3	0.0000464766	64598	3	0	1	1843	1	0	0	0	0	0.00557621	0	0	0.00557621	35.34	35.3400001525879	35.34	100	100	100	100	100	100	PASS
AMN	1	0.000464684	1	2152	8	0.0002789307	64598	18	0.736343240116593	0.46352292409799	854.272749112596	1	0	0	0	0	0	0	0	0	45.98	45.9799995422363	45.98	100	100	100	100	100	100	PASS
AMPD1	0	0	0	2152	1	0.0000154947	64598	1	0	1	1843	1	0	0	0	0	0	0	0	0	34.75	34.75	34.75	100	100	100	99.04	99.0400009155274	99.04	PASS
AMPD2	0	0	0	2152	4	0.0002168279	64598	14	0	1	1843	1	0	0	0	0	0	0	0	0	42.02	42.0200004577637	42.02	100	100	100	100	100	100	PASS
AMPD3	0	0	0	0	0	0	0	0	0	0	0	1	0.000262	0	0	0.000262	0	0	0	0	35.7	35.7000007629395	35.7	100	100	100	100	100	100	PASS
AMT	2	0.001394917	3	2152	12	0.0003871969	64598	25	1.84903997455505	0.0602615659704055	111.062066083457	0.927942746178418	0.000262	0	0	0.000262	0.007899624	0	0	0.007899624	35.79	35.7900009155273	35.79	100	100	100	100	100	100	PASS
ANAPC1	0	0	0	2152	1	0.000046454	64598	3	0	0	0	NA	0.000131	0	0	0.000131	0.005111526	0	0	0.005111526	29.97	29.9699993133545	29.97	98.1	98.0999984741211	98.1	86.07	86.0699996948242	86.07	LOW_DP
ANGPTL3	1	0.000464684	1	2152	3	0.0006820061	64598	44	-0.553534672235757	1	1843	1	0	0	0	0	0	0	0	0	37.01	37.0099983215332	37.01	100	100	100	100	100	100	PASS
ANK3	0	0	0	0	0	0	0	0	0	0	0	1	0.015355	0.000393	0.000393	0.016141	0.001858736	0	0	0.001858736	36.56	36.560001373291	36.56	100	100	100	99.89	99.8899993896485	99.89	PASS
ANKS6	0	0	0	2152	2	0.0000774555	64598	5	0	1	1843	1	0.000656	0	0	0.000656	0.000929368	0	0	0.000929368	35.56	35.560001373291	35.56	100	100	100	99.02	99.0199966430664	99.02	PASS
ANO10	1	0.000465549	1	2152	8	0.0010265123	64598	66	-1.14074598684494	0.726801930814563	1339.49595849124	1	0.001835	0	0	0.001835	0.008828992	0	0	0.008828992	38.35	38.3499984741211	38.35	100	100	100	99.05	99.0500030517578	99.05	PASS
ANO5	3	0.002323418	5	2152	24	0.0050235117	64598	325	-1.11244750792161	0.0842879290133778	155.342653171655	1	0	0	0	0	0	0	0	0	36.36	36.3600006103516	36.36	100	100	100	99.98	99.9800033569336	99.98	PASS
ANO6	0	0	0	2152	2	0.002028817	64598	131	0	0.0237483099595549	43.7681352554596	0.544723051652785	0.000795	0.000262	0	0.001057	0.00697026	0	0	0.00697026	37.1	37.0999984741211	37.1	100	100	100	99.97	99.9700012207031	99.97	PASS
ANTXR1	0	0	0	0	0	0	0	0	0	0	0	1	0.000131	0	0	0.000131	0.000929368	0.000464684	0	0.001394052	36.1	36.0999984741211	36.1	99.2	99.1999969482422	99.2	97.44	97.4400024414063	97.44	PASS
ANTXR2	0	0	0	2152	3	0.0001551145	64598	10	0	1	1843	1	0.000131	0	0	0.000131	0.007899624	0	0	0.007899624	37.72	37.7200012207031	37.72	100	100	100	100	100	100	PASS
AP1B1	0	0	0	0	0	0	0	0	0	0	0	1	0	0	0	0	0	0	0	0	42.58	42.5800018310547	42.58	100	100	100	100	100	100	PASS
AP1S1	0	0	0	2152	2	0.0000620319	64598	4	0	1	1843	1	0	0	0	0	0.00464684	0	0	0.00464684	37	37	37	100	100	100	100	100	100	PASS
AP3B1	0	0	0	0	0	0	0	0	0	0	0	1	0.000131	0.000393	0	0.000524	0.015334578	0	0	0.015334578	35.97	35.9700012207031	35.97	100	100	100	100	100	100	PASS
AP3B2	0	0	0	2152	3	0.0000619458	64598	4	0	1	1843	1	0	0	0	0	0	0	0	0	38.88	38.8800010681152	38.88	100	100	100	100	100	100	PASS
AP3D1	0	0	0	0	0	0	0	0	0	0	0	1	0.000918	0.000525	0	0.001443	0.00836431	0	0	0.00836431	44.39	44.3899993896484	44.39	100	100	100	100	100	100	PASS
AP4B1	1	0.0027881	6	2152	6	0.0003097648	64598	20	3.17003718839618	0.000147309818753809	0.27149199596327	0.01180399982449	0	0	0	0	0	0	0	0	34.81	34.810001373291	34.81	100	100	100	98.6	98.5999984741211	98.6	PASS
AP4E1	0	0	0	0	0	0	0	0	0	0	0	1	0.000131	0.000131	0	0.000262	0	0	0	0	34.94	34.939998626709	34.94	100	100	100	99.82	99.8199996948242	99.82	PASS
AP4M1	0	0	0	2152	8	0.0002013559	64598	13	0	1	1843	1	0	0	0	0	0.00464684	0	0	0.00464684	40.38	40.3800010681152	40.38	100	100	100	100	100	100	PASS
AP4S1	1	0.00151362	3	2152	6	0.0028952758	64598	187	-0.935697727151456	0.298093315943346	549.385981283587	1	0.000134	0	0	0.000134	0.00371747	0	0	0.00371747	39.46	39.4599990844727	39.46	100	100	100	99.79	99.7900009155273	99.79	PASS
AP5Z1	0	0	0	2152	6	0.0003406886	64598	22	0	1	1843	1	0	0	0	0	0	0	0	0	43.56	43.560001373291	43.56	100	100	100	100	100	100	PASS
APBB1	0	0	0	2152	2	0.0001239023	64598	8	0	1	1843	1	0	0	0	0	0	0	0	0	38.63	38.6300010681152	38.63	100	100	100	100	100	100	PASS
APC2	0	0	0	0	0	0	0	0	0	0	0	1	0	0	0	0	0.000464684	0	0	0.000464684	43.86	43.8600006103516	43.86	100	100	100	100	100	100	PASS
APOB	0	0	0	2152	4	0.0001084137	64598	7	0	1	1843	1	0	0	0	0	0	0	0	0	36.38	36.3800010681152	36.38	100	100	100	99.8	99.8000030517578	99.8	PASS
APOC2	0	0	0	0	0	0	0	0	0	0	0	1	0	0	0	0	0.000464684	0	0	0.000464684	34.15	34.1500015258789	34.15	100	100	100	100	100	100	PASS
APOE	0	0	0	2152	7	0.0003873646	64598	25	0	1	1843	1	0	0	0	0	0.000464684	0	0	0.000464684	38.13	38.1300010681152	38.13	100	100	100	100	100	100	PASS
APRT	0	0	0	2152	10	0.0003407125	64598	22	0	1	1843	1	0	0	0	0	0	0	0	0	53.14	53.1399993896484	53.14	100	100	100	100	100	100	PASS
APTX	0	0	0	2152	5	0.0007437024	64598	48	0	0.408495670180356	752.857520142396	1	0	0	0	0	0	0	0	0	34.32	34.3199996948242	34.32	100	100	100	99.4	99.4000015258789	99.4	PASS
AQP7	0	0	0	0	0	0	0	0	0	0	0	1	0	0	0	0	0.000464684	0	0	0.000464684	41.42	41.4199981689453	41.42	100	100	100	100	100	100	PASS
ARFGEF2	0	0	0	2152	1	0.0000154851	64598	1	0	1	1843	1	0	0.000393	0	0.000393	0	0	0	0	37.38	37.3800010681152	37.38	100	100	100	99.91	99.9100036621094	99.91	PASS
ARG1	0	0	0	2152	4	0.0000929219	64598	6	0	1	1843	1	0	0	0	0	0.000464684	0	0	0.000464684	37.37	37.3699989318848	37.37	100	100	100	100	100	100	PASS
ARHGEF1	0	0	0	0	0	0	0	0	0	0	0	1	0.000131	0	0	0.000131	0.000464684	0	0	0.000464684	36.13	36.1300010681152	36.13	100	100	100	100	100	100	PASS
ARHGEF18	0	0	0	2152	3	0.0000774392	64598	5	0	1	1843	1	0.009997	0.000131	0	0.010128	0.008828994	0	0	0.008828994	43.94	43.939998626709	43.94	100	100	100	100	100	100	PASS
ARHGEF2	0	0	0	0	0	0	0	0	0	0	0	1	0.000131	0	0	0.000131	0.000464684	0	0	0.000464684	37.79	37.7900009155273	37.79	100	100	100	99.81	99.8099975585938	99.81	PASS
ARL13B	0	0	0	2152	3	0.0000774857	64598	5	0	1	1843	1	0	0	0	0	0.007899624	0	0	0.007899624	38.06	38.060001373291	38.06	100	100	100	98.95	98.9499969482422	98.95	PASS
ARL2BP	0	0	0	2152	1	0.0000464612	64598	3	0	1	1843	1	0	0	0	0	0.008829	0	0	0.008829	39.82	39.8199996948242	39.82	100	100	100	100	100	100	PASS
ARL3	0	0	0	2152	1	0.0000154885	64598	1	0	1	1843	1	0	0	0	0	0	0	0	0	37.58	37.5800018310547	37.58	100	100	100	100	100	100	PASS
ARL6	0	0	0	2152	3	0.0000775001	64598	5	0	1	1843	1	0	0	0	0	0.014405204	0	0	0.014405204	35.96	35.9599990844727	35.96	100	100	100	100	100	100	PASS
ARL6IP1	0	0	0	0	0	0	0	0	0	0	0	1	0.00315	0	0	0.00315	0	0	0	0	34.45	34.4500007629395	34.45	100	100	100	98.92	98.9199981689453	98.92	PASS
ARMC2	0	0	0	2152	1	0.0000154856	64598	1	0	1	1843	1	0	0.00243	0	0.00243	0.000464684	0	0	0.000464684	34.97	34.9700012207031	34.97	100	100	100	97.03	97.0299987792969	97.03	PASS
ARMC9	1	0.000464684	1	2152	6	0.0001858452	64598	12	1.32214854399696	0.34692280498506	639.378729587465	1	0.000132	0	0	0.000132	0	0	0	0	38.31	38.310001373291	38.31	100	100	100	100	100	100	PASS
ARNT2	0	0	0	0	0	0	0	0	0	0	0	1	0.00079	0.000131	0	0.000921	0.000929368	0	0	0.000929368	37.82	37.8199996948242	37.82	100	100	100	100	100	100	PASS
ARPC1B	0	0	0	0	0	0	0	0	0	0	0	1	0	0	0	0	0.00464684	0	0	0.00464684	44.18	44.1800003051758	44.18	100	100	100	100	100	100	PASS
ARSA	3	0.002324718	5	2152	26	0.002695356	64598	174	-0.21342011466016	1	1843	1	0	0	0	0	0	0	0	0	35.89	35.8899993896484	35.89	100	100	100	96.43	96.4300003051758	96.43	PASS
ARSB	3	0.001394052	3	2152	15	0.0009140548	64598	59	0.60893181029254	0.453958356445519	836.645250929091	1	0.001338	0	0	0.001338	0.01394052	0	0.000464684	0.014405204	34.9	34.9000015258789	34.9	100	100	100	98.56	98.5599975585938	98.56	PASS
ARSG	0	0	0	0	0	0	0	0	0	0	0	1	0.000131	0	0	0.000131	0	0	0	0	34.03	34.0299987792969	34.03	100	100	100	99.65	99.6500015258789	99.65	PASS
ARV1	1	0.000929368	2	2152	3	0.0007129826	64598	46	0.382383102011587	0.668265667842297	1231.61362583335	1	0	0	0	0	0	0	0	0	37.02	37.0200004577637	37.02	100	100	100	100	100	100	PASS
ASAH1	0	0	0	2152	8	0.0002168253	64598	14	0	1	1843	1	0.000131	0	0	0.000131	0	0	0	0	36.76	36.7599983215332	36.76	100	100	100	98.14	98.1399993896484	98.14	PASS
ASCC1	0	0	0	2152	3	0.0001394114	64598	9	0	1	1843	1	0.000262	0.000262	0	0.000524	0.000929368	0	0	0.000929368	39.42	39.4199981689453	39.42	100	100	100	100	100	100	PASS
ASL	3	0.001858736	4	2152	25	0.0037021253	64598	239	-0.994031848720773	0.201655151827429	371.650444817952	1	0.000262	0	0.000131	0.000393	0.00464684	0	0	0.00464684	43.45	43.4500007629395	43.45	100	100	100	100	100	100	PASS
ASNS	0	0	0	2152	7	0.0001703524	64598	11	0	1	1843	1	0	0	0	0	0.00464684	0	0	0.00464684	37.32	37.3199996948242	37.32	100	100	100	98.61	98.6100006103516	98.61	PASS
ASPA	2	0.002323418	5	2152	11	0.0006195209	64598	40	1.90702387026052	0.0145452272218532	26.8068537698754	0.394218437792286	0	0	0	0	0	0	0	0	40.27	40.2700004577637	40.27	100	100	100	100	100	100	PASS
ASPH	0	0	0	2152	2	0.0000619944	64598	4	0	1	1843	1	0.000656	0	0	0.000656	0.004182152	0	0	0.004182152	38.07	38.0699996948242	38.07	100	100	100	99.36	99.3600006103516	99.36	PASS
ASPM	2	0.000929368	2	2152	27	0.0010865877	64598	70	-0.225482745196607	1	1843	1	0.000393	0	0	0.000393	0.00185874	0	0	0.00185874	35.42	35.4199981689453	35.42	100	100	100	99.95	99.9499969482422	99.95	PASS
ASS1	1	0.000464684	1	2152	23	0.0013475284	64598	87	-1.53599380305518	0.535330835878486	986.61473052405	1	0	0.000403	0	0.000403	0.000929368	0	0	0.000929368	40.85	40.8499984741211	40.85	100	100	100	100	100	100	PASS
ASTN2	0	0	0	2152	2	0.0000621355	64598	4	0	1	1843	1	0	0	0	0	0	0	0	0	33.05	33.0499992370606	33.05	100	100	100	100	100	100	PASS
ATAD1	0	0	0	2152	1	0.0000154871	64598	1	0	1	1843	1	0.000131	0	0	0.000131	0.001858734	0	0	0.001858734	34.17	34.1699981689453	34.17	100	100	100	99.1	99.0999984741211	99.1	PASS
ATAD3A	0	0	0	2152	1	0.0000154828	64598	1	0	1	1843	1	0.000656	0.002098	0	0.002754	0	0	0	0	45.21	45.2099990844727	45.21	100	100	100	100	100	100	PASS
ATCAY	0	0	0	0	0	0	0	0	0	0	0	1	0.000262	0	0.000131	0.000393	0.00836431	0	0	0.00836431	41.01	41.0099983215332	41.01	100	100	100	100	100	100	PASS
ATF6	1	0.000464684	1	2152	2	0.0000929478	64598	6	2.32175734760148	0.204994629081207	377.805101396664	1	0.000414	0	0	0.000414	0.00185874	0	0	0.00185874	37.21	37.2099990844727	37.21	100	100	100	99.71	99.7099990844727	99.71	PASS
ATG5	0	0	0	0	0	0	0	0	0	0	0	1	0.000131	0	0	0.000131	0	0	0	0	38.09	38.0900001525879	38.09	100	100	100	100	100	100	PASS
ATIC	0	0	0	2152	4	0.0002322925	64598	15	0	1	1843	1	0.000131	0	0	0.000131	0	0	0	0	37	37	37	100	100	100	99.33	99.3300018310547	99.33	PASS
ATM	4	0.001858736	4	2152	67	0.0018123205	64598	117	0.0364837644441218	0.797997327075275	1470.70907379973	1	0.000657	0.001443	0	0.0021	0.000464684	0	0	0.000464684	35.94	35.939998626709	35.94	100	100	100	99.73	99.7300033569336	99.73	PASS
ATOH7	0	0	0	0	0	0	0	0	0	0	0	1	0.006828	0	0	0.006828	0.000464684	0	0	0.000464684	50.24	50.2400016784668	50.24	100	100	100	100	100	100	PASS
ATP13A2	1	0.000929368	2	2152	8	0.0004182646	64598	27	1.1518340707782	0.23989090083177	442.118930232952	1	0.00058	0.000658	0	0.001238	0	0	0	0	41.92	41.9199981689453	41.92	100	100	100	100	100	100	PASS
ATP2A1	1	0.000464684	1	2152	12	0.0004497031	64598	29	0.047277141657965	0.625941309509005	1153.6098334251	1	0.000262	0	0	0.000262	0.000464684	0	0	0.000464684	39.72	39.7200012207031	39.72	100	100	100	100	100	100	PASS
ATP2B2	0	0	0	0	0	0	0	0	0	0	0	1	0.000131	0.000262	0	0.000393	0	0	0	0	39.47	39.4700012207031	39.47	100	100	100	99.01	99.0100021362305	99.01	PASS
ATP5F1A	0	0	0	2152	1	0.0000154842	64598	1	0	1	1843	1	0	0	0	0	0.000929368	0	0	0.000929368	38.21	38.2099990844727	38.21	100	100	100	100	100	100	PASS
ATP5F1D	0	0	0	0	0	0	0	0	0	0	0	1	0	0	0	0	0	0	0	0	45.61	45.6100006103516	45.61	100	100	100	100	100	100	PASS
ATP5F1E	0	0	0	0	0	0	0	0	0	0	0	1	0	0	0	0	0	0	0	0	38.57	38.5699996948242	38.57	100	100	100	100	100	100	PASS
ATP5MK	0	0	0	2152	2	0.0000619603	64598	4	0	0	0	NA	0	0	0	0	0	0	0	0	0	0	0	0	0	0	0	0	0	LOW_DP
ATP6V0A2	0	0	0	2152	3	0.0001084435	64598	7	0	1	1843	1	0	0	0	0	0.009293684	0	0	0.009293684	36.76	36.7599983215332	36.76	100	100	100	99.83	99.8300018310547	99.83	PASS
ATP6V0A4	0	0	0	2152	11	0.0003562468	64598	23	0	1	1843	1	0	0	0	0	0	0	0	0	36.03	36.0299987792969	36.03	100	100	100	99.97	99.9700012207031	99.97	PASS
ATP6V1A	0	0	0	0	0	0	0	0	0	0	0	1	0	0	0	0	0.012081784	0	0	0.012081784	34.48	34.4799995422363	34.48	100	100	100	98.04	98.0400009155274	98.04	PASS
ATP6V1B1	1	0.000464684	1	2152	7	0.0002635078	64598	17	0.818404303632902	0.445645893014975	821.3253808266	1	0.000262	0	0	0.000262	0.000929368	0	0	0.000929368	38.77	38.7700004577637	38.77	100	100	100	100	100	100	PASS
ATP6V1E1	0	0	0	0	0	0	0	0	0	0	0	1	0.000273	0	0	0.000273	0.000464684	0	0	0.000464684	37.46	37.4599990844727	37.46	100	100	100	100	100	100	PASS
ATP7B	6	0.00697026	15	2152	65	0.0047699962	64598	308	0.547224354634214	0.152587514376136	281.218788995219	1	0	0	0	0	0	0	0	0	35.13	35.1300010681152	35.13	100	100	100	99.8	99.8000030517578	99.8	PASS
ATP8A2	0	0	0	2152	4	0.0000774699	64598	5	0	1	1843	1	0.0136	0.00118	0.001836	0.016616	0.000929368	0.00650558	0	0.007434948	37.81	37.810001373291	37.81	100	100	100	98.16	98.1600036621094	98.16	PASS
ATP8B1	2	0.0009298	2	2152	6	0.0001394076	64598	9	2.73761121197168	0.0471029396398259	86.8107177561991	0.789188343238173	0.000131	0	0	0.000131	0	0	0	0	37.29	37.2900009155273	37.29	100	100	100	100	100	100	PASS
ATPAF2	0	0	0	0	0	0	0	0	0	0	0	1	0	0	0	0	0.000929368	0	0	0.000929368	42.39	42.3899993896484	42.39	100	100	100	100	100	100	PASS
ATR	0	0	0	2152	5	0.0002642796	64598	17	0	1	1843	1	0.000136	0	0	0.000136	0.012081784	0	0	0.012081784	36.59	36.5900001525879	36.59	100	100	100	99.54	99.5400009155274	99.54	PASS
AUH	0	0	0	2152	6	0.0001548697	64598	10	0	1	1843	1	0.000393	0.000789	0	0.001182	0.000929368	0	0.000464684	0.001394052	35.69	35.689998626709	35.69	100	100	100	100	100	100	PASS
AURKC	0	0	0	2152	3	0.0008211437	64598	53	0	0.419693896167895	773.49585063743	1	0	0	0	0	0	0	0	0	35.85	35.8499984741211	35.85	100	100	100	100	100	100	PASS
AVIL	0	0	0	2152	1	0.0000309636	64598	2	0	1	1843	1	0.00105	0	0	0.00105	0.00557621	0	0	0.00557621	35.18	35.1800003051758	35.18	100	100	100	100	100	100	PASS
B3GALNT2	0	0	0	2152	3	0.0003252488	64598	21	0	1	1843	1	0.000131	0.00118	0	0.001311	0	0	0	0	35.53	35.5299987792969	35.53	100	100	100	100	100	100	PASS
B3GALT6	1	0.000466853	1	2152	6	0.0001731097	64598	11	1.43128178718084	0.325162328663997	599.274171727747	1	0	0	0	0	0	0	0	0	40.72	40.7200012207031	40.72	100	100	100	100	100	100	PASS
B3GAT3	0	0	0	2152	2	0.0000774368	64598	5	0	1	1843	1	0.000131	0	0	0.000131	0	0	0	0	42.58	42.5800018310547	42.58	100	100	100	100	100	100	PASS
B3GLCT	1	0.000929368	2	2152	2	0.0014406499	64598	93	-0.632397905166188	0.77233480409838	1423.41304395331	1	0.000131	0.000131	0	0.000262	0	0	0	0	37.54	37.5400009155273	37.54	100	100	100	100	100	100	PASS
B4GALNT1	0	0	0	2152	3	0.0001086375	64598	7	0	1	1843	1	0	0	0	0	0.00557621	0	0	0.00557621	38.79	38.7900009155273	38.79	100	100	100	100	100	100	PASS
B4GALT1	0	0	0	0	0	0	0	0	0	0	0	1	0.000131	0.000265	0	0.000396	0	0	0	0	38.45	38.4500007629395	38.45	100	100	100	98.48	98.4800033569336	98.48	PASS
B4GALT7	0	0	0	2152	4	0.0003252146	64598	21	0	1	1843	1	0.000918	0	0	0.000918	0	0	0	0	37.25	37.25	37.25	100	100	100	99.71	99.7099990844727	99.71	PASS
B9D1	1	0.00139405	3	2152	3	0.0002477842	64598	16	2.49212620503333	0.022040726655125	40.6210592253953	0.527546223706433	0	0	0	0	0.000929368	0	0	0.000929368	44.73	44.7299995422363	44.73	100	100	100	100	100	100	PASS
B9D2	0	0	0	2152	1	0.0000154866	64598	1	0	1	1843	1	0.00562	0	0	0.00562	0.000464684	0	0	0.000464684	38.89	38.8899993896484	38.89	100	100	100	100	100	100	PASS
BAAT	0	0	0	2152	1	0.000015489	64598	1	0	1	1843	1	0.000262	0	0	0.000262	0.000464684	0	0	0.000464684	34.82	34.8199996948242	34.82	100	100	100	99.94	99.9400024414063	99.94	PASS
BBIP1	0	0	0	2152	1	0.0000309741	64598	2	0	1	1843	1	0	0	0	0	0	0	0	0	37.05	37.0499992370605	37.05	100	100	100	100	100	100	PASS
BBS10	0	0	0	2152	19	0.0017968867	64598	116	0	0.0567093329863262	104.515300693799	0.900993971498269	0	0	0	0	0.00557621	0	0	0.00557621	35.55	35.5499992370606	35.55	100	100	100	99.67	99.6699981689453	99.67	PASS
BBS12	0	0	0	2152	10	0.0004026166	64598	26	0	1	1843	1	0	0	0	0	0.00139405	0	0	0.00139405	38.31	38.310001373291	38.31	100	100	100	100	100	100	PASS
BBS2	2	0.000929368	2	2152	18	0.0005266076	64598	34	0.819521628319951	0.324047858659002	597.22020350854	1	0	0	0	0	0.008829	0	0	0.008829	35.42	35.4199981689453	35.42	100	100	100	99.75	99.75	99.75	PASS
BBS4	0	0	0	2152	2	0.0000464626	64598	3	0	1	1843	1	0	0	0	0	0	0	0	0	36.27	36.2700004577637	36.27	100	100	100	100	100	100	PASS
BBS5	0	0	0	2152	4	0.0001239406	64598	8	0	1	1843	1	0	0	0	0	0.00325279	0	0	0.00325279	42.4	42.4000015258789	42.4	100	100	100	100	100	100	PASS
BBS7	0	0	0	2152	9	0.0005577699	64598	36	0	0.63130661953765	1163.49809980789	1	0	0	0	0	0.00139405	0	0	0.00139405	35.4	35.4000015258789	35.4	100	100	100	100	100	100	PASS
BBS9	0	0	0	2152	11	0.0003719801	64598	24	0	1	1843	1	0.004736	0.000131	0	0.004867	0.006505576	0.000929368	0	0.007434944	34.92	34.9199981689453	34.92	100	100	100	99.13	99.129997253418	99.13	PASS
BCAM	0	0	0	2152	1	0.0000154856	64598	1	0	1	1843	1	0	0	0	0	0.000929368	0	0	0.000929368	35.41	35.4099998474121	35.41	100	100	100	98.25	98.25	98.25	PASS
BCAT2	0	0	0	0	0	0	0	0	0	0	0	1	0	0	0	0	0.000929368	0	0	0.000929368	39.02	39.0200004577637	39.02	100	100	100	100	100	100	PASS
BCHE	4	0.014405184	31	2152	16	0.0246422733	64598	1592	-0.774547265315741	0.00167287894104023	3.08311588833714	0.0770778972084284	0.000131	0	0	0.000131	0.007434944	0.000464684	0	0.007899628	39.61	39.6100006103516	39.61	100	100	100	100	100	100	PASS
BCKDHA	0	0	0	2152	15	0.0009913916	64598	64	0	0.274160959213554	505.278647830581	1	0	0	0	0	0.001858734	0	0	0.001858734	41.84	41.8400001525879	41.84	100	100	100	100	100	100	PASS
BCKDHB	2	0.003252784	7	2152	22	0.0009450935	64598	61	1.78314605366511	0.00626433304596229	11.5451658037085	0.23090331607417	0.00118	0	0	0.00118	0.005111528	0	0	0.005111528	34.51	34.5099983215332	34.51	100	100	100	99.79	99.7900009155273	99.79	PASS
BCL10	0	0	0	0	0	0	0	0	0	0	0	1	0	0	0	0	0	0	0	0	39.73	39.7299995422363	39.73	100	100	100	100	100	100	PASS
BCS1L	0	0	0	2152	11	0.0006504085	64598	42	0	0.646646655602005	1191.7697862745	1	0	0	0	0	0	0	0	0	38.21	38.2099990844727	38.21	100	100	100	99.17	99.1699981689453	99.17	PASS
BDP1	1	0.00139405	3	2152	1	0.000480203	64598	31	1.53756598513098	0.0957433732791664	176.455036953504	1	0.000131	0	0	0.000131	0.00929368	0	0	0.00929368	36.63	36.6300010681152	36.63	100	100	100	100	100	100	PASS
BHLHA9	0	0	0	0	0	0	0	0	0	0	0	1	0.000134	0	0	0.000134	0	0	0	0	42.42	42.4199981689453	42.42	100	100	100	100	100	100	PASS
BIN1	0	0	0	0	0	0	0	0	0	0	0	1	0.000131	0	0	0.000131	0.004182158	0	0	0.004182158	40.89	40.8899993896484	40.89	100	100	100	98.8	98.8000030517578	98.8	PASS
BLM	1	0.00325279	7	2152	23	0.0010845527	64598	70	1.58457752767498	0.0121289595162387	22.3536723884279	0.357015040709071	0.000131	0	0	0.000131	0	0	0	0	36.98	36.9799995422363	36.98	100	100	100	100	100	100	PASS
BLNK	0	0	0	0	0	0	0	0	0	0	0	1	0.000131	0	0	0.000131	0	0	0	0	37.86	37.8600006103516	37.86	100	100	100	100	100	100	PASS
BLOC1S3	0	0	0	2152	1	0.0000154971	64598	1	0	1	1843	1	0	0	0	0	0.000464684	0	0	0.000464684	36.48	36.4799995422363	36.48	100	100	100	97.85	97.8499984741211	97.85	PASS
BLOC1S5	0	0	0	0	0	0	0	0	0	0	0	1	0.00118	0	0	0.00118	0.001394052	0	0	0.001394052	40.55	40.5499992370606	40.55	100	100	100	100	100	100	PASS
BLOC1S6	0	0	0	2152	1	0.0000154933	64598	1	0	1	1843	1	0	0	0	0	0	0	0.000464684	0.000464684	35.36	35.3600006103516	35.36	100	100	100	99.18	99.1800003051758	99.18	PASS
BMP1	0	0	0	2152	2	0.0000309808	64598	2	0	1	1843	1	0.003672	0	0	0.003672	0.000464684	0	0	0.000464684	42.81	42.810001373291	42.81	100	100	100	100	100	100	PASS
BMP2	0	0	0	0	0	0	0	0	0	0	0	1	0.000131	0	0	0.000131	0	0	0	0	38.28	38.2799987792969	38.28	100	100	100	100	100	100	PASS
BMPER	0	0	0	2152	1	0.0000154909	64598	1	0	1	1843	1	0.000393	0	0	0.000393	0.005111524	0	0	0.005111524	35.74	35.7400016784668	35.74	100	100	100	99.13	99.129997253418	99.13	PASS
BMPR1B	0	0	0	2152	1	0.0000154875	64598	1	0	1	1843	1	0	0	0	0	0.00139405	0	0	0.00139405	36.04	36.0400009155273	36.04	100	100	100	99.87	99.870002746582	99.87	PASS
BOLA3	0	0	0	2152	3	0.0001083941	64598	7	0	1	1843	1	0	0	0	0	0.000929368	0	0	0.000929368	36.95	36.9500007629395	36.95	100	100	100	100	100	100	PASS
BPGM	0	0	0	2152	2	0.000030977	64598	2	0	1	1843	1	0	0	0	0	0.000464684	0	0	0.000464684	37.03	37.0299987792969	37.03	100	100	100	99.78	99.7799987792969	99.78	PASS
BRAT1	0	0	0	2152	6	0.0008519707	64598	55	0	0.425933854604776	784.996094036602	1	0	0.000131	0	0.000131	0.000464684	0	0	0.000464684	39.23	39.2299995422363	39.23	100	100	100	100	100	100	PASS
BRCA1	3	0.002323418	5	2152	40	0.0009447402	64598	61	1.29825917567483	0.0617001633846024	113.713401117822	0.927942746178418	0.000394	0.001975	0	0.002369	0.000464684	0	0	0.000464684	36.79	36.7900009155273	36.79	100	100	100	100	100	100	PASS
BRCA2	3	0.001394052	3	2152	63	0.0015648673	64598	101	-0.166755945833654	1	1843	1	0	0	0	0	0	0	0	0	37.14	37.1399993896484	37.14	100	100	100	99.74	99.7399978637695	99.74	PASS
BRDT	1	0.000464684	1	2152	1	0.0000154899	64598	1	4.90685023533532	0.0634404698960828	116.920786018481	0.927942746178418	0.000131	0	0	0.000131	0	0	0	0	38.51	38.5099983215332	38.51	100	100	100	100	100	100	PASS
BRF1	0	0	0	2152	2	0.000061943	64598	4	0	1	1843	1	0.000396	0.000526	0	0.000922	0.0027881	0	0	0.0027881	42.42	42.4199981689453	42.42	100	100	100	100	100	100	PASS
BSCL2	0	0	0	2152	3	0.0000464713	64598	3	0	1	1843	1	0	0	0	0	0	0	0	0	38.47	38.4700012207031	38.47	100	100	100	100	100	100	PASS
BSND	0	0	0	2152	4	0.0003407017	64598	22	0	1	1843	1	0	0	0	0	0	0	0	0	37.19	37.189998626709	37.19	100	100	100	100	100	100	PASS
BTD	3	0.002323418	5	2152	25	0.0024783779	64598	160	-0.0931474556545625	1	1843	1	0	0.000263	0	0.000263	0	0	0	0	36.21	36.2099990844727	36.21	100	100	100	100	100	100	PASS
BTG4	0	0	0	0	0	0	0	0	0	0	0	1	0	0	0	0	0	0	0	0	34.54	34.5400009155273	34.54	100	100	100	100	100	100	PASS
BUB1B	1	0.000464684	1	2152	4	0.0001239137	64598	8	1.90691426898643	0.255435346417997	470.767343448368	1	0	0	0	0	0	0	0	0	36.7	36.7000007629395	36.7	100	100	100	100	100	100	PASS
BVES	0	0	0	2152	1	0.0000154899	64598	1	0	1	1843	1	0.000131	0	0	0.000131	0	0	0	0	39.37	39.3699989318848	39.37	100	100	100	100	100	100	PASS
C11orf80	1	0.000464684	1	2152	0	0	64598	0	0	0.0322397003745318	59.4177677902621	0.612554307116105	0.012218	0	0	0.012218	0	0	0	0	37.5	37.5	37.5	100	100	100	100	100	100	PASS
C12orf4	0	0	0	2152	3	0.0000929555	64598	6	0	1	1843	1	0.000131	0	0	0.000131	0.00139405	0	0	0.00139405	37.95	37.9500007629395	37.95	100	100	100	100	100	100	PASS
C12orf57	0	0	0	2152	1	0.0000154861	64598	1	0	1	1843	1	0	0	0	0	0.00139405	0	0	0.00139405	43.28	43.2799987792969	43.28	100	100	100	100	100	100	PASS
C14orf39	0	0	0	0	0	0	0	0	0	0	0	1	0	0.000266	0	0.000266	0.00743494	0	0	0.00743494	35.86	35.8600006103516	35.86	100	100	100	99.13	99.129997253418	99.13	PASS
C19orf12	2	0.004203458	9	2152	4	0.000247866	64598	16	4.08394436374618	0.0000000473622239337638	0.0000872885787099267	0.0000145480964516545	0.000131	0	0	0.000131	0.000464684	0	0	0.000464684	35.81	35.810001373291	35.81	100	100	100	100	100	100	PASS
C1QB	0	0	0	2152	1	0.0000154952	64598	1	0	1	1843	1	0	0	0	0	0	0	0	0	37.54	37.5400009155273	37.54	100	100	100	100	100	100	PASS
C1QBP	0	0	0	2152	2	0.000077441	64598	5	0	1	1843	1	0	0	0	0	0.000464684	0	0	0.000464684	37.32	37.3199996948242	37.32	100	100	100	100	100	100	PASS
C1QC	0	0	0	2152	3	0.0002013728	64598	13	0	1	1843	1	0	0	0	0	0	0	0	0	34.84	34.8400001525879	34.84	100	100	100	99.49	99.4899978637695	99.49	PASS
C2	1	0.0251163	54	2152	1	0.00755816	64598	488	1.7325169850114	0.000000000000403650460575643	0.00000000074392779884091	0.000000000371963899420455	0	0	0	0	0.002788104	0	0	0.002788104	35.22	35.2200012207031	35.22	100	100	100	98.32	98.3199996948242	98.32	PASS
C2CD3	0	0	0	2152	1	0.000340716	64598	22	0	1	1843	1	0	0	0	0	0	0	0	0	35.69	35.689998626709	35.69	100	100	100	99.52	99.5199966430664	99.52	PASS
C3	0	0	0	2152	1	0.0000309991	64598	2	0	1	1843	1	0	0	0	0	0.00836431	0	0	0.00836431	36.68	36.6800003051758	36.68	100	100	100	99.79	99.7900009155273	99.79	PASS
C4A	0	0	0	0	0	0	0	0	0	0	0	1	0	0	0	0	0.000464684	0	0	0.000464684	1977-12-01	12.7700004577637	1977-12-01	31.39	31.3899993896484	31.39	23.72	23.7199993133545	23.72	LOW_DP
C5	0	0	0	2152	1	0.0000309866	64598	2	0	1	1843	1	0.002098	0	0	0.002098	0.000929368	0	0	0.000929368	36.63	36.6300010681152	36.63	100	100	100	99.36	99.3600006103516	99.36	PASS
C8A	0	0	0	2152	1	0.0000619444	64598	4	0	1	1843	1	0	0	0	0	0.000464684	0	0	0.000464684	35.92	35.9199981689453	35.92	100	100	100	98.62	98.620002746582	98.62	PASS
C8B	2	0.007900056	17	2152	3	0.0024491506	64598	158	1.68958139098612	0.0000574644774776834	0.10590703199137	0.00608184135461466	0.000264	0	0	0.000264	0.00418216	0	0	0.00418216	33.98	33.9799995422363	33.98	100	100	100	99.68	99.6800003051758	99.68	PASS
C8orf37	0	0	0	0	0	0	0	0	0	0	0	1	0	0	0	0	0.004182152	0	0	0.004182152	39.35	39.3499984741211	39.35	100	100	100	100	100	100	PASS
CA12	0	0	0	2152	1	0.0000154871	64598	1	0	1	1843	1	0.000131	0	0	0.000131	0	0	0	0	35.29	35.2900009155273	35.29	100	100	100	97.77	97.7699966430664	97.77	PASS
CA2	0	0	0	0	0	0	0	0	0	0	0	1	0.000262	0	0	0.000262	0.003717468	0	0	0.003717468	36.34	36.3400001525879	36.34	100	100	100	100	100	100	PASS
CA5A	0	0	0	2152	3	0.0000774306	64598	5	0	1	1843	1	0.001573	0	0	0.001573	0.01115242	0	0	0.01115242	41.62	41.6199989318848	41.62	100	100	100	100	100	100	PASS
CA8	0	0	0	0	0	0	0	0	0	0	0	1	0	0	0	0	0.003252784	0	0	0.003252784	37.78	37.7799987792969	37.78	100	100	100	100	100	100	PASS
CABP2	1	0.00139405	3	2152	2	0.0010532555	64598	68	0.404426857336278	0.499823734061907	921.175141876095	1	0.000396	0	0	0.000396	0.000464684	0	0	0.000464684	38.59	38.5900001525879	38.59	100	100	100	100	100	100	PASS
CABP4	0	0	0	2152	4	0.0002169022	64598	14	0	1	1843	1	0	0	0	0	0	0	0	0	42.78	42.7799987792969	42.78	100	100	100	100	100	100	PASS
CACNA1B	0	0	0	0	0	0	0	0	0	0	0	1	0.000262	0.000657	0	0.000919	0.008364314	0	0	0.008364314	39.83	39.8300018310547	39.83	100	100	100	99.98	99.9800033569336	99.98	PASS
CACNA1D	0	0	0	2152	1	0.0000309876	64598	2	0	1	1843	1	0.000524	0	0	0.000524	0.008364308	0	0	0.008364308	36.73	36.7299995422363	36.73	100	100	100	99.2	99.1999969482422	99.2	PASS
CACNA2D2	0	0	0	0	0	0	0	0	0	0	0	1	0.000262	0	0	0.000262	0.008828992	0	0	0.008828992	40.19	40.189998626709	40.19	100	100	100	100	100	100	PASS
CACNA2D4	0	0	0	2152	1	0.0000464641	64598	3	0	1	1843	1	0.000262	0	0	0.000262	0.00139405	0	0	0.00139405	36.96	36.9599990844727	36.96	100	100	100	100	100	100	PASS
CAD	1	0.000464684	1	2152	3	0.0002943178	64598	19	0.658875173382918	0.480823708850821	886.158095412063	1	0	0	0	0	0	0	0	0	38.61	38.6100006103516	38.61	100	100	100	100	100	100	PASS
CALCRL	0	0	0	0	0	0	0	0	0	0	0	1	0.000393	0	0	0.000393	0.003717474	0	0	0.003717474	35.14	35.1399993896484	35.14	100	100	100	98.65	98.6500015258789	98.65	PASS
CAMK2A	0	0	0	0	0	0	0	0	0	0	0	1	0.00118	0	0	0.00118	0.007434944	0	0	0.007434944	37.45	37.4500007629395	37.45	100	100	100	99.82	99.8199996948242	99.82	PASS
CANT1	1	0.000464684	1	2152	9	0.0004063244	64598	26	0.193617969038694	0.587280909809576	1082.35871677905	1	0	0	0	0	0	0	0	0	42.15	42.1500015258789	42.15	100	100	100	100	100	100	PASS
CAPN1	0	0	0	2152	2	0.0000619833	64598	4	0	1	1843	1	0	0.007284	0	0.007284	0	0.000464684	0	0.000464684	43.52	43.5200004577637	43.52	100	100	100	100	100	100	PASS
CAPN3	3	0.002323418	5	2152	46	0.0027414944	64598	177	-0.238713797717078	1	1843	1	0.001705	0	0	0.001705	0.000464684	0	0.000464684	0.000929368	35.28	35.2799987792969	35.28	100	100	100	97.68	97.6800003051758	97.68	PASS
CARD11	0	0	0	2152	1	0.0000154895	64598	1	0	1	1843	1	0.000393	0.000133	0	0.000526	0	0	0	0	41.95	41.9500007629395	41.95	100	100	100	100	100	100	PASS
CARD14	0	0	0	2152	1	0.000805103	64598	52	0	0.416925861446651	768.394362646177	1	0	0	0	0	0	0	0	0	40.82	40.8199996948242	40.82	100	100	100	100	100	100	PASS
CARD9	0	0	0	2152	3	0.0000464741	64598	3	0	1	1843	1	0	0	0	0	0	0	0	0	45.9	45.9000015258789	45.9	100	100	100	100	100	100	PASS
CARMIL2	0	0	0	2152	1	0.0000310916	64598	2	0	1	1843	1	0	0	0	0	0.008829	0	0	0.008829	39.21	39.2099990844727	39.21	100	100	100	99.68	99.6800003051758	99.68	PASS
CARS1	0	0	0	2152	2	0.0000929445	64598	6	0	1	1843	1	0	0	0	0	0	0	0	0	39.21	39.2099990844727	39.21	100	100	100	99.89	99.8899993896485	99.89	PASS
CARS2	0	0	0	2152	2	0.000030976	64598	2	0	1	1843	1	0.000402	0	0	0.000402	0	0	0	0	41.2	41.2000007629395	41.2	100	100	100	100	100	100	PASS
CASP14	0	0	0	0	0	0	0	0	0	0	0	1	0	0	0	0	0.00836431	0	0	0.00836431	2021-05-30	2021-05-30	2021-05-30	100	100	100	99.21	99.2099990844727	99.21	PASS
CASP8	0	0	0	2152	3	0.0000929215	64598	6	0	1	1843	1	0.001705	0	0	0.001705	0.001394052	0	0	0.001394052	37.1	37.0999984741211	37.1	100	100	100	100	100	100	PASS
CASQ2	0	0	0	2152	4	0.0001238875	64598	8	0	1	1843	1	0.000262	0	0	0.000262	0	0	0	0	36.41	36.4099998474121	36.41	100	100	100	100	100	100	PASS
CAST	0	0	0	0	0	0	0	0	0	0	0	1	0.000393	0	0	0.000393	0.01022305	0	0	0.01022305	35.84	35.8400001525879	35.84	100	100	100	99.98	99.9800033569336	99.98	PASS
CATSPER1	0	0	0	0	0	0	0	0	0	0	0	1	0.000131	0	0	0.000131	0	0	0	0	37.4	37.4000015258789	37.4	100	100	100	99.01	99.0100021362305	99.01	PASS
CAV1	0	0	0	0	0	0	0	0	0	0	0	1	0	0	0	0	0	0	0	0	34.99	34.9900016784668	34.99	100	100	100	100	100	100	PASS
CAVIN1	0	0	0	2152	1	0.0000309684	64598	2	0	1	1843	1	0	0	0	0	0	0	0	0	42.53	42.5299987792969	42.53	100	100	100	100	100	100	PASS
CBLIF	0	0	0	2152	2	0.000325211	64598	21	0	1	1843	1	0.000131	0	0	0.000131	0	0	0	0	36.49	36.4900016784668	36.49	100	100	100	100	100	100	PASS
CBS	1	0.00706357	15	2152	5	0.0002146807	64598	14	5.04013311806489	0	0	NA	0	0	0	0	0	0	0	0	2021-02-01	2.21000003814697	2021-02-01	2025-05-01	2025-05-01	2025-05-01	0	0	0	LOW_DP
CC2D1A	0	0	0	2152	1	0.0000154885	64598	1	0	1	1843	1	0.000262	0.000525	0	0.000787	0.01022305	0	0	0.01022305	40.22	40.2200012207031	40.22	100	100	100	100	100	100	PASS
CC2D2A	2	0.000929368	2	2152	30	0.0013008702	64598	84	-0.485155142105397	1	1843	1	0.000131	0.000131	0	0.000262	0.000464684	0	0	0.000464684	35.73	35.7299995422363	35.73	100	100	100	99.9	99.9000015258789	99.9	PASS
CCBE1	0	0	0	2152	2	0.000278749	64598	18	0	1	1843	1	0.009733	0.000657	0	0.01039	0	0	0.000464684	0.000464684	35.31	35.310001373291	35.31	100	100	100	99.66	99.6600036621094	99.66	PASS
CCDC103	0	0	0	0	0	0	0	0	0	0	0	1	0	0	0	0	0.000464684	0	0	0.000464684	38.68	38.6800003051758	38.68	100	100	100	100	100	100	PASS
CCDC115	0	0	0	2152	1	0.0000310116	64598	2	0	1	1843	1	0	0	0	0	0.004182158	0	0	0.004182158	40.47	40.4700012207031	40.47	100	100	100	100	100	100	PASS
CCDC39	0	0	0	2152	10	0.000542956	64598	35	0	0.629605997875451	1160.36385408446	1	0	0	0	0	0.005111528	0	0	0.005111528	33.56	33.560001373291	33.56	100	100	100	99.66	99.6600036621094	99.66	PASS
CCDC40	1	0.000464684	1	2152	13	0.000979008	64598	63	-1.07507067808632	0.7251612692587	1336.47221924378	1	0.000131	0	0	0.000131	0	0	0	0	41.37	41.3699989318848	41.37	100	100	100	100	100	100	PASS
CCDC47	0	0	0	2152	3	0.0000619674	64598	4	0	1	1843	1	0	0	0	0	0	0	0	0	36.62	36.6199989318848	36.62	100	100	100	100	100	100	PASS
CCDC65	0	0	0	2152	2	0.000108419	64598	7	0	1	1843	1	0	0	0	0	0.007434944	0	0	0.007434944	39.09	39.0900001525879	39.09	100	100	100	100	100	100	PASS
CCDC8	1	0.000464684	1	2152	3	0.000294356	64598	19	0.658687935728926	0.480823708850821	886.158095412063	1	0.000131	0	0	0.000131	0.000464684	0	0	0.000464684	36.82	36.8199996948242	36.82	100	100	100	99.91	99.9100036621094	99.91	PASS
CCDC88A	0	0	0	0	0	0	0	0	0	0	0	1	0.000131	0	0	0.000131	0.000464684	0	0	0.000464684	37.27	37.2700004577637	37.27	100	100	100	98.8	98.8000030517578	98.8	PASS
CCDC88C	0	0	0	2152	1	0.0000154856	64598	1	0	1	1843	1	0.000262	0	0	0.000262	0.00743494	0	0	0.00743494	38.66	38.6599998474121	38.66	100	100	100	99.66	99.6600036621094	99.66	PASS
CCN6	0	0	0	2152	6	0.0002169457	64598	14	0	1	1843	1	0	0	0	0	0	0	0	0	36.68	37.3850002288818	38.09	100	100	100	100	100	100	PASS
CCNF	0	0	0	2152	1	0.0000464626	64598	3	0	1	1843	1	0	0	0	0	0	0	0	0	40.84	40.8400001525879	40.84	100	100	100	99.86	99.8600006103516	99.86	PASS
CCNO	1	0.000464684	1	2152	5	0.0002478987	64598	16	0.906499264986743	0.427173431482454	787.280634222162	1	0	0	0	0	0.00929368	0	0	0.00929368	48.71	48.7099990844727	48.71	100	100	100	100	100	100	PASS
CCT5	0	0	0	0	0	0	0	0	0	0	0	1	0.000131	0	0	0.000131	0	0	0	0	36.73	36.7299995422363	36.73	100	100	100	99.73	99.7300033569336	99.73	PASS
CD19	0	0	0	0	0	0	0	0	0	0	0	1	0	0	0	0	0	0	0	0	38.3	38.2999992370605	38.3	100	100	100	100	100	100	PASS
CD247	0	0	0	2152	2	0.0003252015	64598	21	0	1	1843	1	0	0.000131	0	0.000131	0.002788108	0	0	0.002788108	41.23	41.2299995422363	41.23	100	100	100	99.94	99.9400024414063	99.94	PASS
CD27	0	0	0	2152	3	0.0000619583	64598	4	0	1	1843	1	0	0	0	0	0.00139405	0	0	0.00139405	37.89	37.8899993896484	37.89	100	100	100	100	100	100	PASS
CD36	1	0.000464684	1	2152	12	0.0009156055	64598	59	-0.978476158295602	1	1843	1	0.000134	0	0	0.000134	0.005111524	0	0	0.005111524	35.62	35.6199989318848	35.62	100	100	100	98.86	98.8600006103516	98.86	PASS
CD3D	0	0	0	2152	2	0.0000619492	64598	4	0	1	1843	1	0	0	0	0	0	0	0	0	27.61	27.6100006103516	27.61	100	100	100	99.6	99.5999984741211	99.6	PASS
CD3E	0	0	0	2152	2	0.0000929166	64598	6	0	1	1843	1	0	0	0	0	0	0	0	0	34.85	34.8499984741211	34.85	100	100	100	92.66	92.6600036621094	92.66	PASS
CD3G	0	0	0	2152	2	0.0000933757	64598	6	0	1	1843	1	0	0	0	0	0.000464684	0	0	0.000464684	37.46	37.4599990844727	37.46	100	100	100	99.77	99.7699966430664	99.77	PASS
CD4	0	0	0	2152	1	0.000030977	64598	2	0	1	1843	1	0.004853	0	0	0.004853	0.00139405	0	0.000464684	0.001858734	39.94	39.939998626709	39.94	100	100	100	100	100	100	PASS
CD40	0	0	0	0	0	0	0	0	0	0	0	1	0.000131	0.000787	0	0.000918	0	0	0	0	34.61	34.6100006103516	34.61	100	100	100	100	100	100	PASS
CD55	0	0	0	2152	1	0.000046454	64598	3	0	1	1843	1	0	0	0	0	0.00185874	0	0	0.00185874	36.74	36.7400016784668	36.74	100	100	100	100	100	100	PASS
CD59	0	0	0	0	0	0	0	0	0	0	0	1	0	0	0	0	0.00139405	0	0	0.00139405	34.27	34.2700004577637	34.27	100	100	100	97.28	97.2799987792969	97.28	PASS
CD70	0	0	0	0	0	0	0	0	0	0	0	1	0	0	0	0	0.00836431	0	0	0.00836431	38.98	38.9799995422363	38.98	100	100	100	100	100	100	PASS
CD79A	0	0	0	0	0	0	0	0	0	0	0	1	0	0	0	0	0.000464684	0	0	0.000464684	36.69	36.689998626709	36.69	100	100	100	92.05	92.0500030517578	92.05	PASS
CD81	0	0	0	0	0	0	0	0	0	0	0	1	0	0	0	0	0	0	0	0	43.85	43.8499984741211	43.85	100	100	100	100	100	100	PASS
CD8A	0	0	0	2152	1	0.0000154866	64598	1	0	1	1843	1	0	0	0	0	0.001858736	0	0	0.001858736	37.7	37.7000007629395	37.7	100	100	100	100	100	100	PASS
CDAN1	0	0	0	2152	7	0.0004647704	64598	30	0	1	1843	1	0	0	0	0	0	0	0	0	40.78	40.7799987792969	40.78	100	100	100	100	100	100	PASS
CDC14A	0	0	0	2152	3	0.0000464718	64598	3	0	1	1843	1	0.000262	0	0	0.000262	0	0	0.000464684	0.000464684	38.88	38.8800010681152	38.88	100	100	100	99.6	99.5999984741211	99.6	PASS
CDC45	0	0	0	2152	2	0.000170369	64598	11	0	1	1843	1	0	0.000525	0	0.000525	0.000464684	0	0	0.000464684	38.48	38.4799995422363	38.48	100	100	100	100	100	100	PASS
CDCA7	0	0	0	0	0	0	0	0	0	0	0	1	0	0	0	0	0.00325279	0	0	0.00325279	34.8	34.7999992370606	34.8	100	100	100	99.96	99.9599990844727	99.96	PASS
CDH11	0	0	0	2152	1	0.0000154904	64598	1	0	1	1843	1	0	0	0	0	0.008829	0	0	0.008829	34.57	34.5699996948242	34.57	100	100	100	99.09	99.0899963378906	99.09	PASS
CDH23	1	0.000464684	1	2152	28	0.0008983498	64598	58	-0.951027341023095	1	1843	1	0.000262	0	0	0.000262	0.000929368	0	0	0.000929368	40.65	40.6500015258789	40.65	100	100	100	100	100	100	PASS
CDH3	1	0.000464684	1	2152	2	0.0000464583	64598	3	3.32224170163269	0.122857997716503	226.427289791516	1	0	0.000131	0	0.000131	0.008829	0	0	0.008829	39.26	39.2599983215332	39.26	100	100	100	100	100	100	PASS
CDHR1	0	0	0	2152	6	0.0001548821	64598	10	0	1	1843	1	0	0	0	0	0.000464684	0	0	0.000464684	36.12	36.1199989318848	36.12	100	100	100	99.37	99.370002746582	99.37	PASS
CDK10	0	0	0	2152	2	0.0000929305	64598	6	0	1	1843	1	0.000262	0	0	0.000262	0.001394052	0	0	0.001394052	40.78	40.7799987792969	40.78	100	100	100	100	100	100	PASS
CDK5RAP2	1	0.000464684	1	2152	8	0.0003872232	64598	25	0.263084578332216	0.573526163447534	1057.00871923381	1	0.000665	0	0	0.000665	0.000464684	0	0	0.000464684	35.65	35.6500015258789	35.65	100	100	100	100	100	100	PASS
CDK6	0	0	0	0	0	0	0	0	0	0	0	1	0.000262	0.000271	0	0.000533	0.00464684	0	0	0.00464684	38.18	38.1800003051758	38.18	100	100	100	99.92	99.9199981689453	99.92	PASS
CDSN	0	0	0	2152	1	0.0000929368	64598	6	0	1	1843	1	0	0	0	0	0.000464684	0	0	0.000464684	36.35	36.3499984741211	36.35	100	100	100	100	100	100	PASS
CDT1	0	0	0	2152	2	0.000201291	64598	13	0	1	1843	1	0	0	0	0	0	0	0	0	47	47	47	100	100	100	100	100	100	PASS
CEACAM16	0	0	0	0	0	0	0	0	0	0	0	1	0	0	0	0	0.000464684	0	0	0.000464684	39.63	39.6300010681152	39.63	100	100	100	99.7	99.6999969482422	99.7	PASS
CENPE	0	0	0	2152	2	0.000248079	64598	16	0	1	1843	1	0.000131	0	0	0.000131	0.00139405	0	0	0.00139405	34.76	34.7599983215332	34.76	100	100	100	99.71	99.7099990844727	99.71	PASS
CENPF	0	0	0	2152	10	0.0004338302	64598	28	0	1	1843	1	0.000131	0	0	0.000131	0.00371747	0	0	0.00371747	36.05	36.0499992370606	36.05	100	100	100	99.8	99.8000030517578	99.8	PASS
CENPJ	1	0.000464684	1	2152	13	0.0011305704	64598	73	-1.2827289547779	0.73467633675745	1354.00848864398	1	0	0	0	0	0.00232342	0	0	0.00232342	37.24	37.2400016784668	37.24	100	100	100	100	100	100	PASS
CENPT	0	0	0	0	0	0	0	0	0	0	0	1	0	0	0	0	0.008829	0	0	0.008829	41.25	41.25	41.25	100	100	100	100	100	100	PASS
CEP104	1	0.000464684	1	2152	4	0.0002323314	64598	15	1.0000658207138	0.408085717019449	752.101976466845	1	0	0	0	0	0	0	0	0	37.37	37.3699989318848	37.37	100	100	100	95.66	95.6600036621094	95.66	PASS
CEP112	0	0	0	2152	3	0.0000774598	64598	5	0	1	1843	1	0.003684	0.01024	0	0.013924	0.001394052	0	0	0.001394052	34.74	34.7400016784668	34.74	100	100	100	98.22	98.2200012207031	98.22	PASS
CEP120	0	0	0	2152	2	0.0000774449	64598	5	0	1	1843	1	0.000262	0	0	0.000262	0.011152418	0	0	0.011152418	35.8	35.7999992370605	35.8	100	100	100	99.81	99.8099975585938	99.81	PASS
CEP135	0	0	0	2152	6	0.0004181496	64598	27	0	1	1843	1	0.000262	0	0	0.000262	0.002323418	0	0	0.002323418	38.49	38.4900016784668	38.49	100	100	100	99.97	99.9700012207031	99.97	PASS
CEP152	0	0	0	2152	6	0.0004183388	64598	27	0	1	1843	1	0	0	0	0	0	0	0	0	35.59	35.5900001525879	35.59	100	100	100	100	100	100	PASS
CEP164	0	0	0	2152	5	0.0003772796	64598	24	0	1	1843	1	0	0	0	0	0.001394052	0	0	0.001394052	34.4	34.4000015258789	34.4	100	100	100	97.46	97.4599990844727	97.46	PASS
CEP19	0	0	0	0	0	0	0	0	0	0	0	1	0	0	0	0	0.000464684	0	0	0.000464684	38.81	38.810001373291	38.81	100	100	100	100	100	100	PASS
CEP250	1	0.000464684	1	2152	3	0.0004645571	64598	30	0.00039403767617889	1	1843	1	0.000655	0	0	0.000655	0	0	0	0	36.76	36.7599983215332	36.76	100	100	100	99.99	99.9899978637695	99.99	PASS
CEP290	3	0.001394484	3	2152	67	0.0030548067	64598	197	-1.13134971174908	0.225500899485318	415.59815775144	1	0.000656	0	0	0.000656	0.008829	0	0	0.008829	37.09	37.0900001525879	37.09	100	100	100	98.87	98.870002746582	98.87	PASS
CEP41	1	0.000464684	1	2152	3	0.0000464603	64598	3	3.32217959587384	0.122857997716503	226.427289791516	1	0.000656	0	0	0.000656	0	0	0	0	36.71	36.7099990844727	36.71	100	100	100	100	100	100	PASS
CEP55	0	0	0	2152	3	0.0003716636	64598	24	0	1	1843	1	0.000131	0	0	0.000131	0.000464684	0	0	0.000464684	36.64	36.6399993896484	36.64	100	100	100	99.89	99.8899993896485	99.89	PASS
CEP57	0	0	0	2152	2	0.0000309755	64598	2	0	1	1843	1	0.000131	0	0	0.000131	0	0	0	0	36.51	36.5099983215332	36.51	100	100	100	100	100	100	PASS
CEP63	0	0	0	2152	1	0.0000464698	64598	3	0	1	1843	1	0.000131	0	0	0.000131	0.012081784	0	0	0.012081784	36.07	36.0699996948242	36.07	100	100	100	99.34	99.3399963378906	99.34	PASS
CEP78	1	0.000464684	1	2152	9	0.0001703759	64598	11	1.44752869282995	0.325162328663997	599.274171727747	1	0.000131	0	0	0.000131	0.000929368	0	0	0.000929368	37.82	37.8199996948242	37.82	100	100	100	99.67	99.6699981689453	99.67	PASS
CEP83	0	0	0	2152	5	0.0002323708	64598	15	0	1	1843	1	0.000131	0	0	0.000131	0.00557621	0	0	0.00557621	36.4	36.4000015258789	36.4	100	100	100	100	100	100	PASS
CERS1	0	0	0	0	0	0	0	0	0	0	0	1	0	0	0	0	0.00836431	0	0	0.00836431	38.99	38.9900016784668	38.99	100	100	100	98.52	98.5199966430664	98.52	PASS
CERS3	0	0	0	0	0	0	0	0	0	0	0	1	0.001316	0.000918	0	0.002234	0	0	0	0	39.22	39.2200012207031	39.22	100	100	100	99.93	99.9300003051758	99.93	PASS
CFAP251	0	0	0	2152	1	0.00171928	64598	111	0	0	0	NA	0	0	0	0	0	0	0	0	0	0	0	0	0	0	0	0	0	LOW_DP
CFAP298	0	0	0	2152	3	0.0003871114	64598	25	0	1	1843	1	0	0	0	0	0	0	0	0	41.48	41.4799995422363	41.48	100	100	100	100	100	100	PASS
CFAP300	1	0.000465116	1	2152	0	0	64598	0	0	0.0322397003745318	59.4177677902621	0.612554307116105	0.000131	0	0	0.000131	0	0	0	0	41	41	41	100	100	100	100	100	100	PASS
CFAP410	2	0.0009298	2	2152	7	0.0010378628	64598	67	-0.158623408639382	1	1843	1	0	0	0	0	0.0027881	0	0	0.0027881	41.39	41.3899993896484	41.39	100	100	100	100	100	100	PASS
CFAP418	0	0	0	2152	1	0.0000154866	64598	1	0	0	0	NA	0	0	0	0	0	0	0	0	0	0	0	0	0	0	0	0	0	LOW_DP
CFAP43	0	0	0	2152	4	0.0004027273	64598	26	0	1	1843	1	0	0.000131	0	0.000131	0	0	0	0	35.73	35.7299995422363	35.73	100	100	100	100	100	100	PASS
CFAP44	0	0	0	0	0	0	0	0	0	0	0	1	0.000131	0	0	0.000131	0.009293674	0	0	0.009293674	36.78	36.7799987792969	36.78	100	100	100	99.42	99.4199981689453	99.42	PASS
CFAP53	1	0.000464684	1	2152	1	0.0000309703	64598	2	3.90729270767986	0.0936357732577362	172.570730114008	1	0	0	0	0	0	0	0	0	36.31	36.310001373291	36.31	100	100	100	100	100	100	PASS
CFAP65	0	0	0	2152	1	0.000030977	64598	2	0	1	1843	1	0.00124	0	0	0.00124	0	0	0	0	37.89	37.8899993896484	37.89	100	100	100	99.8	99.8000030517578	99.8	PASS
CFAP69	0	0	0	0	0	0	0	0	0	0	0	1	0.000262	0	0	0.000262	0.00464684	0	0	0.00464684	38.61	38.6100006103516	38.61	100	100	100	99.79	99.7900009155273	99.79	PASS
CFAP70	0	0	0	0	0	0	0	0	0	0	0	1	0.000131	0	0	0.000131	0.001868886	0	0	0.001868886	37.41	37.4099998474121	37.41	100	100	100	100	100	100	PASS
CFAP91	0	0	0	2152	1	0.0000929109	64598	6	0	0	0	NA	0	0	0	0	0	0	0	0	0	0	0	0	0	0	0	0	0	LOW_DP
CFB	0	0	0	2152	2	0.0001238669	64598	8	0	1	1843	1	0	0	0	0	0.000464684	0	0	0.000464684	34.52	34.5200004577637	34.52	100	100	100	100	100	100	PASS
CFD	0	0	0	2152	1	0.0000310106	64598	2	0	1	1843	1	0.000131	0	0	0.000131	0	0	0	0	33.38	33.3800010681152	33.38	100	100	100	100	100	100	PASS
CFI	0	0	0	2152	3	0.000092956	64598	6	0	1	1843	1	0	0.000394	0	0.000394	0.00139405	0	0	0.00139405	39.18	39.1800003051758	39.18	100	100	100	100	100	100	PASS
CFTR	6	0.014869842	32	2152	77	0.0221261638	64598	1429	-0.573364022521435	0.0242361856948065	44.6672902355284	0.544723051652785	0.000524	0.000131	0	0.000655	0.000464684	0	0.000464684	0.000929368	34.57	34.5699996948242	34.57	100	100	100	99.61	99.6100006103516	99.61	PASS
CHAT	0	0	0	2152	7	0.0001548989	64598	10	0	1	1843	1	0.000131	0	0	0.000131	0.000464684	0	0	0.000464684	36.48	36.4799995422363	36.48	100	100	100	100	100	100	PASS
CHIT1	0	0	0	0	0	0	0	0	0	0	0	1	0	0	0	0	0.00185874	0	0	0.00185874	35.6	35.5999984741211	35.6	100	100	100	98.66	98.6600036621094	98.66	PASS
CHKB	0	0	0	2152	1	0.0000309722	64598	2	0	1	1843	1	0	0	0	0	0	0	0	0	38.56	38.560001373291	38.56	100	100	100	100	100	100	PASS
CHMP1A	0	0	0	0	0	0	0	0	0	0	0	1	0.001706	0.001732	0	0.003438	0.000464684	0	0	0.000464684	42.42	42.4199981689453	42.42	100	100	100	100	100	100	PASS
CHP1	0	0	0	0	0	0	0	0	0	0	0	1	0.000262	0.000131	0	0.000393	0	0	0	0	34.64	34.6399993896484	34.64	100	100	100	100	100	100	PASS
CHRNA1	0	0	0	2152	4	0.0000774661	64598	5	0	1	1843	1	0	0	0	0	0.00325279	0	0	0.00325279	33.06	33.060001373291	33.06	100	100	100	100	100	100	PASS
CHRNA3	0	0	0	0	0	0	0	0	0	0	0	1	0	0	0	0	0	0	0	0	33.23	33.2299995422363	33.23	100	100	100	97.14	97.1399993896484	97.14	PASS
CHRNB1	0	0	0	2152	2	0.0000774396	64598	5	0	1	1843	1	0	0	0	0	0.000464684	0	0	0.000464684	36.68	36.6800003051758	36.68	100	100	100	100	100	100	PASS
CHRND	1	0.000465116	1	2152	5	0.0002481951	64598	16	0.90611593616065	0.427173431482454	787.280634222162	1	0	0	0	0	0	0	0	0	40.91	40.9099998474121	40.91	100	100	100	100	100	100	PASS
CHRNE	3	0.001859601	4	2152	19	0.0028342946	64598	183	-0.607996614734114	0.534004434817295	984.170173368274	1	0	0	0	0	0	0	0	0	38.07	38.0699996948242	38.07	100	100	100	100	100	100	PASS
CHRNG	2	0.001858734	4	2152	9	0.0013784302	64598	89	0.43129410859959	0.546682004327403	1007.5349339754	1	0	0	0	0	0.000464684	0	0	0.000464684	37.71	37.7099990844727	37.71	100	100	100	100	100	100	PASS
CHST11	0	0	0	0	0	0	0	0	0	0	0	1	0.000656	0	0	0.000656	0.000929368	0	0	0.000929368	33.88	33.8800010681152	33.88	100	100	100	98.53	98.5299987792969	98.53	PASS
CHST14	0	0	0	2152	3	0.0000619637	64598	4	0	1	1843	1	0	0	0	0	0	0	0	0	39.29	39.2900009155273	39.29	100	100	100	100	100	100	PASS
CHST3	0	0	0	0	0	0	0	0	0	0	0	1	0	0	0	0	0.000464684	0	0	0.000464684	39.74	39.7400016784668	39.74	100	100	100	100	100	100	PASS
CHST6	1	0.000464684	1	2152	4	0.0007125726	64598	46	-0.616787038880784	1	1843	1	0	0	0	0	0.008829	0	0	0.008829	36.49	36.4900016784668	36.49	99.58	99.5800018310547	99.58	94.93	94.9300003051758	94.93	PASS
CHST8	0	0	0	0	0	0	0	0	0	0	0	1	0.000659	0.001053	0	0.001712	0.000929368	0.000464684	0	0.001394052	47.37	47.3699989318848	47.37	100	100	100	100	100	100	PASS
CHSY1	0	0	0	0	0	0	0	0	0	0	0	1	0.000262	0	0	0.000262	0.008829	0	0	0.008829	38.46	38.4599990844727	38.46	100	100	100	100	100	100	PASS
CIB1	0	0	0	0	0	0	0	0	0	0	0	1	0.000132	0	0	0.000132	0	0	0	0	40.75	40.75	40.75	100	100	100	100	100	100	PASS
CIB2	0	0	0	2152	4	0.0003255118	64598	21	0	1	1843	1	0	0	0	0	0	0	0	0	38.72	38.7200012207031	38.72	100	100	100	96.6	96.5999984741211	96.6	PASS
CIBAR1	0	0	0	2152	1	0.0000154981	64598	1	0	0	0	NA	0	0	0	0	0	0	0	0	0	0	0	0	0	0	0	0	0	LOW_DP
CIDEC	0	0	0	0	0	0	0	0	0	0	0	1	0.000394	0	0	0.000394	0	0	0	0	40.39	40.3899993896484	40.39	100	100	100	100	100	100	PASS
CIITA	0	0	0	2152	2	0.0000310024	64598	2	0	1	1843	1	0.000136	0	0	0.000136	0	0	0	0	36.85	36.8499984741211	36.85	100	100	100	97.79	97.7900009155274	97.79	PASS
CILK1	0	0	0	2152	1	0.0000309703	64598	2	0	1	1843	1	0	0	0	0	0	0	0	0	36.79	36.7900009155273	36.79	100	100	100	99.59	99.5899963378906	99.59	PASS
CISD2	0	0	0	0	0	0	0	0	0	0	0	1	0.000131	0	0	0.000131	0.00139405	0	0	0.00139405	35.39	35.3899993896484	35.39	100	100	100	99.13	99.129997253418	99.13	PASS
CIT	0	0	0	2152	3	0.0000464636	64598	3	0	1	1843	1	0.001048	0.000393	0	0.001441	0	0	0	0	36.83	36.8300018310547	36.83	100	100	100	99.74	99.7399978637695	99.74	PASS
CKAP2L	0	0	0	2152	3	0.0001084315	64598	7	0	1	1843	1	0.000393	0	0	0.000393	0.005111526	0	0	0.005111526	35.98	35.9799995422363	35.98	100	100	100	100	100	100	PASS
CLASP1	0	0	0	2152	16	0.0025397247	64598	164	0	0.0117627506181961	21.6787493893354	0.3553893342514	0	0	0	0	0	0	0	0	36.53	36.5299987792969	36.53	100	100	100	99.36	99.3600006103516	99.36	PASS
CLCF1	0	0	0	0	0	0	0	0	0	0	0	1	0	0	0	0	0	0	0	0	41.69	41.689998626709	41.69	100	100	100	100	100	100	PASS
CLCN1	2	0.000929368	2	2152	35	0.0013474831	64598	87	-0.535945303013264	1	1843	1	0	0	0	0	0	0	0	0	37.26	37.2599983215332	37.26	100	100	100	100	100	100	PASS
CLCN2	0	0	0	2152	7	0.0002020599	64598	13	0	1	1843	1	0	0	0	0	0.005111528	0	0	0.005111528	39.44	39.439998626709	39.44	100	100	100	100	100	100	PASS
CLCN7	0	0	0	2152	3	0.0000620069	64598	4	0	1	1843	1	0.000788	0.009473	0	0.010261	0	0	0	0	44.79	44.7900009155273	44.79	100	100	100	100	100	100	PASS
CLCNKB	0	0	0	2152	14	0.000511322	64598	33	0	0.627114656566696	1155.77231205242	1	0.000131	0	0	0.000131	0	0	0	0	40.53	40.5299987792969	40.53	100	100	100	98.9	98.9000015258789	98.9	PASS
CLDN1	0	0	0	0	0	0	0	0	0	0	0	1	0	0	0	0	0.000464684	0	0	0.000464684	38.01	38.0099983215332	38.01	100	100	100	99.71	99.7099990844727	99.71	PASS
CLDN10	0	0	0	0	0	0	0	0	0	0	0	1	0.000262	0.000262	0	0.000524	0.000929368	0	0	0.000929368	36.93	36.9300003051758	36.93	100	100	100	100	100	100	PASS
CLDN14	1	0.000929368	2	2152	3	0.0001238836	64598	8	2.90726475804297	0.0393653413150422	72.5503240436229	0.684437019279461	0	0	0	0	0	0	0	0	42.06	42.060001373291	42.06	100	100	100	98.74	98.7399978637695	98.74	PASS
CLDN16	2	0.001394052	3	2152	3	0.0004490626	64598	29	1.63429589870959	0.0831210688702927	153.192129927949	1	0	0	0	0	0.005576204	0	0	0.005576204	38.69	38.689998626709	38.69	100	100	100	100	100	100	PASS
CLDN19	0	0	0	0	0	0	0	0	0	0	0	1	0	0	0	0	0	0	0	0	39.35	39.3499984741211	39.35	100	100	100	100	100	100	PASS
CLDN9	0	0	0	0	0	0	0	0	0	0	0	1	0	0	0	0	0	0	0	0	38.65	38.6500015258789	38.65	100	100	100	100	100	100	PASS
CLEC7A	0	0	0	0	0	0	0	0	0	0	0	1	0	0	0	0	0.00139405	0	0	0.00139405	40.63	40.6300010681152	40.63	100	100	100	100	100	100	PASS
CLIC5	0	0	0	0	0	0	0	0	0	0	0	1	0	0	0	0	0.000464684	0.000464684	0	0.000929368	35.89	35.8899993896484	35.89	100	100	100	98.75	98.75	98.75	PASS
CLMP	0	0	0	0	0	0	0	0	0	0	0	1	0	0	0	0	0	0	0	0	38.68	38.6800003051758	38.68	100	100	100	100	100	100	PASS
CLN3	0	0	0	2152	10	0.000263315	64598	17	0	1	1843	1	0	0	0	0	0.00139405	0	0	0.00139405	38.71	38.7099990844727	38.71	100	100	100	100	100	100	PASS
CLN5	0	0	0	2152	8	0.0002942266	64598	19	0	1	1843	1	0	0	0	0	0	0	0	0	34.18	34.1800003051758	34.18	100	100	100	100	100	100	PASS
CLN6	0	0	0	2152	5	0.0001240039	64598	8	0	1	1843	1	0.000131	0	0	0.000131	0	0	0	0	37.49	37.4900016784668	37.49	100	100	100	99.33	99.3300018310547	99.33	PASS
CLN8	1	0.000464684	1	2152	7	0.0002478021	64598	16	0.907061557170714	0.427173431482454	787.280634222162	1	0.000131	0.000393	0	0.000524	0.000464684	0	0	0.000464684	34.58	34.5800018310547	34.58	98.7	98.6999969482422	98.7	97.24	97.2399978637695	97.24	PASS
CLPB	1	0.000464684	1	2152	4	0.0006505621	64598	42	-0.485436806463744	1	1843	1	0.000525	0	0	0.000525	0	0	0	0	35.97	35.9700012207031	35.97	100	100	100	97.43	97.4300003051758	97.43	PASS
CLPP	0	0	0	0	0	0	0	0	0	0	0	1	0	0	0	0	0.008828994	0	0	0.008828994	36.45	36.4500007629395	36.45	100	100	100	100	100	100	PASS
CLRN1	1	0.000464684	1	2152	3	0.0001393707	64598	9	1.73732267653355	0.279443124762769	515.013678937783	1	0	0	0	0	0.012081784	0	0	0.012081784	36.61	36.6100006103516	36.61	100	100	100	100	100	100	PASS
CLRN2	0	0	0	0	0	0	0	0	0	0	0	1	0.000131	0	0	0.000131	0.000464684	0	0	0.000464684	37.07	37.0699996948242	37.07	100	100	100	100	100	100	PASS
CNGA3	3	0.003252792	7	2152	25	0.0021993416	64598	142	0.564606872247849	0.344327526500367	634.595631340176	1	0.006189	0	0	0.006189	0.001858736	0	0	0.001858736	37.43	37.4300003051758	37.43	100	100	100	100	100	100	PASS
CNGB1	0	0	0	2152	19	0.0007124896	64598	46	0	0.406053986886351	748.357497831545	1	0	0	0	0	0.008829	0	0	0.008829	37.33	37.3300018310547	37.33	100	100	100	100	100	100	PASS
CNGB3	4	0.004184755	9	2152	25	0.0008529246	64598	55	2.29465304588097	0.000206065733951317	0.379779147672277	0.0151911659068911	0.000131	0	0	0.000131	0.003717468	0	0	0.003717468	35.29	35.2900009155273	35.29	100	100	100	99.38	99.379997253418	99.38	PASS
CNNM4	0	0	0	2152	2	0.0000309842	64598	2	0	1	1843	1	0.000656	0	0	0.000656	0.001858736	0	0	0.001858736	42.91	42.9099998474121	42.91	100	100	100	100	100	100	PASS
CNP	0	0	0	2152	1	0.0000154938	64598	1	0	1	1843	1	0	0	0	0	0	0	0	0	37.77	37.7700004577637	37.77	100	100	100	99.79	99.7900009155273	99.79	PASS
CNPY3	0	0	0	0	0	0	0	0	0	0	0	1	0	0	0	0	0.000464684	0	0	0.000464684	32.75	32.75	32.75	100	100	100	97.46	97.4599990844727	97.46	PASS
CNTN1	0	0	0	0	0	0	0	0	0	0	0	1	0.001183	0.000398	0	0.001581	0.00697026	0	0	0.00697026	36.6	36.5999984741211	36.6	100	100	100	100	100	100	PASS
CNTN2	0	0	0	2152	1	0.000015488	64598	1	0	1	1843	1	0.001444	0.000131	0	0.001575	0.00185874	0	0	0.00185874	37.28	37.2799987792969	37.28	100	100	100	98.67	98.6699981689453	98.67	PASS
CNTNAP1	1	0.000464684	1	2152	3	0.0000464607	64598	3	3.32216717504288	0.122857997716503	226.427289791516	1	0	0	0	0	0	0	0	0	36.6	36.5999984741211	36.6	100	100	100	99.89	99.8899993896485	99.89	PASS
CNTNAP2	0	0	0	2152	3	0.0000619492	64598	4	0	1	1843	1	0.009323	0.010895	0	0.020218	0.022769514	0.000464684	0.000464684	0.023698882	37.75	37.75	37.75	100	100	100	100	100	100	PASS
COA3	0	0	0	2152	2	0.000232341	64598	15	0	1	1843	1	0.000131	0	0	0.000131	0	0	0	0	38.5	38.5	38.5	100	100	100	100	100	100	PASS
COA5	0	0	0	0	0	0	0	0	0	0	0	1	0	0	0	0	0.001858736	0	0	0.001858736	40.02	40.0200004577637	40.02	100	100	100	100	100	100	PASS
COA6	0	0	0	2152	1	0.0000154928	64598	1	0	1	1843	1	0.00092	0	0	0.00092	0	0	0	0	38.4	38.4000015258789	38.4	100	100	100	100	100	100	PASS
COA7	0	0	0	2152	2	0.0000774272	64598	5	0	1	1843	1	0.000131	0	0	0.000131	0	0	0	0	41	41	41	100	100	100	100	100	100	PASS
COA8	0	0	0	2152	3	0.0000464857	64598	3	0	1	1843	1	0.000131	0	0	0.000131	0	0	0	0	39.8	39.7999992370606	39.8	100	100	100	100	100	100	PASS
COASY	0	0	0	2152	4	0.0008829489	64598	57	0	0.265898281129845	490.050532122304	1	0	0	0	0	0	0	0	0	38.55	38.5499992370606	38.55	100	100	100	100	100	100	PASS
COCH	0	0	0	2152	1	0.0000774305	64598	5	0	1	1843	1	0	0	0	0	0	0	0	0	38.81	38.810001373291	38.81	100	100	100	100	100	100	PASS
COG1	0	0	0	2152	1	0.0000154875	64598	1	0	1	1843	1	0.000299	0	0	0.000299	0	0	0	0	37.37	37.3699989318848	37.37	100	100	100	100	100	100	PASS
COG2	0	0	0	0	0	0	0	0	0	0	0	1	0	0	0	0	0	0	0	0	39.49	39.4900016784668	39.49	100	100	100	99.56	99.5599975585938	99.56	PASS
COG4	0	0	0	2152	3	0.000154979	64598	10	0	1	1843	1	0.000262	0	0	0.000262	0.009293684	0	0	0.009293684	36.56	36.560001373291	36.56	100	100	100	100	100	100	PASS
COG5	0	0	0	2152	4	0.000061954	64598	4	0	1	1843	1	0.001311	0.005391	0	0.006702	0.007434944	0	0	0.007434944	35.25	35.25	35.25	100	100	100	100	100	100	PASS
COG6	0	0	0	2152	3	0.000092957	64598	6	0	1	1843	1	0.002364	0	0	0.002364	0.000464684	0	0	0.000464684	37.27	37.2700004577637	37.27	100	100	100	100	100	100	PASS
COG7	1	0.000464684	1	2152	1	0.000216819	64598	14	1.09975878422377	0.388362267551723	715.751659097826	1	0.000131	0	0	0.000131	0	0.000464684	0	0.000464684	39.19	39.189998626709	39.19	100	100	100	100	100	100	PASS
COL11A1	1	0.000464684	1	2152	1	0.0000774329	64598	5	2.58523139105061	0.178507578700088	328.989467544262	1	0.001048	0.001049	0	0.002097	0	0	0.00418216	0.00418216	36.34	36.3400001525879	36.34	100	100	100	100	100	100	PASS
COL11A2	0	0	0	2152	1	0.0000464756	64598	3	0	1	1843	1	0	0	0	0	0.000464684	0	0	0.000464684	34.97	34.9700012207031	34.97	100	100	100	98.1	98.0999984741211	98.1	PASS
COL12A1	0	0	0	2152	5	0.0001084325	64598	7	0	1	1843	1	0.000262	0.000131	0	0.000393	0.000464684	0	0	0.000464684	34.69	34.689998626709	34.69	100	100	100	99.76	99.7600021362305	99.76	PASS
COL13A1	0	0	0	0	0	0	0	0	0	0	0	1	0.000525	0.000263	0	0.000788	0.000464684	0	0	0.000464684	38.89	38.8899993896484	38.89	100	100	100	100	100	100	PASS
COL17A1	0	0	0	2152	10	0.0006040367	64598	39	0	0.637984670785712	1175.80574825807	1	0	0	0	0	0	0	0	0	37.19	37.189998626709	37.19	100	100	100	99.96	99.9599990844727	99.96	PASS
COL18A1	1	0.00650558	14	2152	6	0.0021997828	64598	142	1.56431660167625	0.00056225664717134	1.03623900073678	0.0345413000245593	0.001573	0	0	0.001573	0.009758364	0	0	0.009758364	44.02	44.0200004577637	44.02	100	100	100	100	100	100	PASS
COL1A2	1	0.000464684	1	2152	5	0.0000929334	64598	6	2.32198087540989	0.204994629081207	377.805101396664	1	0	0	0	0	0.00464684	0	0	0.00464684	36.26	36.2599983215332	36.26	100	100	100	99.96	99.9599990844727	99.96	PASS
COL25A1	0	0	0	2152	1	0.0000154919	64598	1	0	1	1843	1	0.001705	0	0	0.001705	0.005576204	0	0	0.005576204	37.9	37.9000015258789	37.9	100	100	100	99.81	99.8099975585938	99.81	PASS
COL27A1	0	0	0	2152	3	0.000077624	64598	5	0	1	1843	1	0.001049	0.000131	0	0.00118	0.000929368	0	0	0.000929368	38.73	38.7299995422363	38.73	100	100	100	100	100	100	PASS
COL3A1	1	0.000464684	1	2152	2	0.0000310048	64598	2	3.90568648246838	0.0936357732577362	172.570730114008	1	0.000131	0	0	0.000131	0.00325279	0	0	0.00325279	37.52	37.5200004577637	37.52	100	100	100	99.74	99.7399978637695	99.74	PASS
COL4A3	3	0.001395351	3	2152	32	0.0008054738	64598	52	0.79271850944945	0.261152880568009	481.304758886841	1	0	0.000131	0	0.000131	0.001394052	0	0	0.001394052	36.29	36.2900009155273	36.29	100	100	100	99.58	99.5800018310547	99.58	PASS
COL4A4	2	0.001394052	3	2152	18	0.0006505075	64598	42	1.09964678101446	0.176588981633755	325.453493151011	1	0.000131	0	0	0.000131	0	0	0.000929368	0.000929368	36.51	36.5099983215332	36.51	100	100	100	99.97	99.9700012207031	99.97	PASS
COL6A2	0	0	0	2152	9	0.0002327262	64598	15	0	1	1843	1	0.000131	0	0	0.000131	0.00743494	0	0	0.00743494	43.24	43.2400016784668	43.24	100	100	100	100	100	100	PASS
COL6A3	0	0	0	2152	7	0.0004181419	64598	27	0	1	1843	1	0.001321	0.000131	0	0.001452	0	0	0	0	39.11	39.1100006103516	39.11	100	100	100	100	100	100	PASS
COL7A1	2	0.001858734	4	2152	52	0.0015182456	64598	98	0.291915135452724	0.573419213435985	1056.81161036252	1	0	0	0	0	0.007899624	0	0	0.007899624	39.81	39.810001373291	39.81	100	100	100	98.83	98.8300018310547	98.83	PASS
COL9A2	0	0	0	2152	1	0.0000155198	64598	1	0	1	1843	1	0	0	0	0	0	0	0	0	39.5	39.5	39.5	100	100	100	100	100	100	PASS
COLEC10	0	0	0	2152	1	0.0000154943	64598	1	0	1	1843	1	0.000393	0	0	0.000393	0.01115241	0	0	0.01115241	36.43	36.4300003051758	36.43	100	100	100	100	100	100	PASS
COLEC11	0	0	0	0	0	0	0	0	0	0	0	1	0	0	0	0	0	0	0	0	45.95	45.9500007629395	45.95	100	100	100	100	100	100	PASS
COLGALT1	0	0	0	0	0	0	0	0	0	0	0	1	0.000135	0	0	0.000135	0.008828994	0	0	0.008828994	39.43	39.4300003051758	39.43	100	100	100	100	100	100	PASS
COLQ	0	0	0	2152	11	0.000309807	64598	20	0	1	1843	1	0	0	0	0	0	0	0	0	38.46	38.4599990844727	38.46	100	100	100	100	100	100	PASS
COPB1	0	0	0	0	0	0	0	0	0	0	0	1	0	0	0	0	0	0	0	0	35.65	35.6500015258789	35.65	100	100	100	100	100	100	PASS
COPB2	0	0	0	2152	1	0.0000619598	64598	4	0	1	1843	1	0.000131	0	0	0.000131	0.012081784	0	0	0.012081784	35.84	35.8400001525879	35.84	100	100	100	100	100	100	PASS
COQ2	0	0	0	2152	5	0.0001703841	64598	11	0	1	1843	1	0.000131	0	0	0.000131	0.001858734	0	0	0.001858734	37.31	37.310001373291	37.31	100	100	100	100	100	100	PASS
COQ4	1	0.000464684	1	2152	9	0.0002168274	64598	14	1.09970289242647	0.388362267551723	715.751659097826	1	0	0	0	0	0.000929368	0	0	0.000929368	38.4	38.4000015258789	38.4	100	100	100	100	100	100	PASS
COQ5	0	0	0	0	0	0	0	0	0	0	0	1	0	0.000131	0	0.000131	0.000464684	0	0	0.000464684	37.45	37.4500007629395	37.45	100	100	100	100	100	100	PASS
COQ6	0	0	0	0	0	0	0	0	0	0	0	1	0	0	0	0	0.00743494	0	0	0.00743494	38.71	38.7099990844727	38.71	100	100	100	99.69	99.6900024414063	99.69	PASS
COQ8A	1	0.000929368	2	2152	17	0.0008558734	64598	55	0.118852560531778	0.706712675256284	1302.47146049733	1	0	0	0	0	0.000482625	0	0	0.000482625	43.36	43.3600006103516	43.36	100	100	100	100	100	100	PASS
COQ8B	0	0	0	2152	7	0.0002168073	64598	14	0	1	1843	1	0	0	0	0	0.000464684	0	0	0.000464684	42.58	42.5800018310547	42.58	100	100	100	100	100	100	PASS
COQ9	0	0	0	2152	1	0.0000154871	64598	1	0	1	1843	1	0	0	0	0	0.008829	0	0	0.008829	34.26	34.2599983215332	34.26	100	100	100	100	100	100	PASS
CORO1A	0	0	0	2152	1	0.0000154856	64598	1	0	0	0	NA	0.000139	0	0	0.000139	0.008829	0	0	0.008829	38.09	38.0900001525879	38.09	99.12	99.120002746582	99.12	87.38	87.379997253418	87.38	LOW_DP
COX14	0	0	0	0	0	0	0	0	0	0	0	1	0	0	0	0	0.00697026	0	0	0.00697026	37.63	37.6300010681152	37.63	100	100	100	100	100	100	PASS
COX15	0	0	0	2152	2	0.0000464732	64598	3	0	1	1843	1	0.000656	0	0	0.000656	0	0	0	0	35.15	35.1500015258789	35.15	100	100	100	99.34	99.3399963378906	99.34	PASS
COX20	0	0	0	2152	1	0.0000154928	64598	1	0	1	1843	1	0	0	0	0	0.000929368	0	0	0.000929368	41.11	41.1100006103516	41.11	100	100	100	100	100	100	PASS
COX4I1	0	0	0	0	0	0	0	0	0	0	0	1	0.000131	0.000131	0	0.000262	0.008829	0	0	0.008829	46.39	46.3899993896484	46.39	100	100	100	100	100	100	PASS
COX5A	0	0	0	0	0	0	0	0	0	0	0	1	0	0	0	0	0.00139405	0	0	0.00139405	35.94	35.939998626709	35.94	100	100	100	100	100	100	PASS
COX6A1	0	0	0	2152	2	0.0000774286	64598	5	0	1	1843	1	0	0	0	0	0	0	0	0	36.81	36.810001373291	36.81	100	100	100	100	100	100	PASS
COX6A2	0	0	0	2152	1	0.0000465405	64598	3	0	1	1843	1	0	0	0	0	0.008829	0	0	0.008829	46.65	46.6500015258789	46.65	100	100	100	100	100	100	PASS
COX6B1	0	0	0	0	0	0	0	0	0	0	0	1	0	0	0	0	0.000464684	0	0	0.000464684	37.37	37.3699989318848	37.37	100	100	100	100	100	100	PASS
CP	0	0	0	2152	12	0.0004338754	64598	28	0	1	1843	1	0	0	0	0	0.012081784	0	0	0.012081784	36.31	36.310001373291	36.31	100	100	100	100	100	100	PASS
CPA6	0	0	0	2152	2	0.0000929186	64598	6	0	1	1843	1	0.004861	0.000131	0	0.004992	0.005576204	0.000464684	0	0.006040888	36.71	36.7099990844727	36.71	100	100	100	100	100	100	PASS
CPAMD8	0	0	0	2152	2	0.0001858668	64598	12	0	1	1843	1	0.001706	0	0	0.001706	0.009758362	0	0	0.009758362	38.13	38.1300010681152	38.13	100	100	100	100	100	100	PASS
CPLANE1	1	0.000464684	1	2152	29	0.0016111475	64598	104	-1.79376670238674	0.267958501457134	493.847518185498	1	0.001452	0	0	0.001452	0.009758364	0	0	0.009758364	35.57	35.5699996948242	35.57	100	100	100	99.23	99.2300033569336	99.23	PASS
CPLX1	0	0	0	0	0	0	0	0	0	0	0	1	0	0.000131	0	0.000131	0.000464684	0	0	0.000464684	45.56	45.560001373291	45.56	100	100	100	98.22	98.2200012207031	98.22	PASS
CPN1	1	0.000464684	1	2152	1	0.0000154895	64598	1	4.90688749093203	0.0634404698960828	116.920786018481	0.927942746178418	0.000262	0	0	0.000262	0	0	0	0	35.12	35.1199989318848	35.12	100	100	100	100	100	100	PASS
CPOX	0	0	0	2152	3	0.0002013481	64598	13	0	1	1843	1	0	0	0	0	0.007899624	0	0	0.007899624	39.6	39.5999984741211	39.6	100	100	100	100	100	100	PASS
CPS1	0	0	0	2152	11	0.000232781	64598	15	0	1	1843	1	0.000262	0	0	0.000262	0.000464684	0	0	0.000464684	37.04	37.0400009155273	37.04	100	100	100	100	100	100	PASS
CPT1A	0	0	0	2152	8	0.0003400431	64598	22	0	1	1843	1	0.002553	0	0	0.002553	0	0	0	0	36.3	36.2999992370606	36.3	100	100	100	96.4	96.4000015258789	96.4	PASS
CPT2	0	0	0	2152	17	0.0004957341	64598	32	0	0.626368259711495	1154.39670264828	1	0	0	0	0	0	0	0	0	37.54	37.5400009155273	37.54	100	100	100	100	100	100	PASS
CR2	0	0	0	0	0	0	0	0	0	0	0	1	0.000131	0	0	0.000131	0.00185874	0	0	0.00185874	35.59	35.5900001525879	35.59	100	100	100	100	100	100	PASS
CRADD	0	0	0	2152	3	0.0002942522	64598	19	0	1	1843	1	0.000655	0.000134	0	0.000789	0.006970262	0	0	0.006970262	38.46	38.4599990844727	38.46	100	100	100	100	100	100	PASS
CRAT	1	0.00185874	4	2152	2	0.0009763449	64598	63	0.928862196545197	0.170058990957261	313.418720334232	1	0	0	0	0	0.000929368	0	0	0.000929368	42.91	42.9099998474121	42.91	100	100	100	100	100	100	PASS
CRB1	2	0.001394052	3	2152	29	0.0010996694	64598	71	0.342214513517903	0.516615610693259	952.122570507676	1	0.001049	0.000131	0	0.00118	0.00185874	0	0	0.00185874	35.54	35.5400009155273	35.54	100	100	100	99.84	99.8399963378906	99.84	PASS
CRB2	1	0.00139405	3	2152	3	0.001941505	64598	125	-0.477893115782711	0.801729925782983	1477.58825321804	1	0	0	0	0	0.000464684	0	0	0.000464684	41.04	41.0400009155273	41.04	100	100	100	100	100	100	PASS
CRBN	0	0	0	0	0	0	0	0	0	0	0	1	0	0	0	0	0.000464684	0	0	0.000464684	35.13	35.1300010681152	35.13	100	100	100	99.38	99.379997253418	99.38	PASS
CREB3L1	0	0	0	0	0	0	0	0	0	0	0	1	0	0	0	0	0	0	0	0	37.65	37.6500015258789	37.65	100	100	100	100	100	100	PASS
CRIPT	0	0	0	0	0	0	0	0	0	0	0	1	0	0	0	0	0	0	0	0	35.85	35.8499984741211	35.85	100	100	100	99.78	99.7799987792969	99.78	PASS
CRLF1	0	0	0	2152	3	0.0000782802	64598	5	0	0	0	NA	0	0	0	0	0.00836431	0	0	0.00836431	35.45	35.4500007629395	35.45	98.34	98.3399963378906	98.34	81.76	81.7600021362305	81.76	LOW_DP
CRPPA	0	0	0	2152	4	0.0003256293	64598	21	0	1	1843	1	0.002492	0	0	0.002492	0.00789963	0	0	0.00789963	35.27	35.3050003051758	35.34	100	100	100	99.98	99.9800033569336	99.98	PASS
CRTAP	0	0	0	2152	2	0.0001548773	64598	10	0	1	1843	1	0	0	0	0	0.003252784	0	0	0.003252784	40.63	40.6300010681152	40.63	100	100	100	100	100	100	PASS
CRYAB	0	0	0	2152	1	0.0000309885	64598	2	0	1	1843	1	0	0	0	0	0	0	0	0	37.31	37.310001373291	37.31	100	100	100	100	100	100	PASS
CSF1R	0	0	0	2152	1	0.0000154813	64598	1	0	1	1843	1	0	0	0	0	0.007434944	0	0	0.007434944	37.5	37.5	37.5	100	100	100	98.19	98.1900024414062	98.19	PASS
CSF2RB	0	0	0	2152	1	0.0000154875	64598	1	0	1	1843	1	0	0.000131	0	0.000131	0	0	0	0	37.41	37.4099998474121	37.41	100	100	100	100	100	100	PASS
CSF3R	0	0	0	2152	3	0.0004955776	64598	32	0	0.626368259711495	1154.39670264828	1	0	0	0	0	0	0	0	0	36.71	36.7099990844727	36.71	100	100	100	100	100	100	PASS
CSGALNACT1	0	0	0	2152	2	0.0000774474	64598	5	0	1	1843	1	0.000655	0.000131	0	0.000786	0.000929368	0	0	0.000929368	38.31	38.310001373291	38.31	100	100	100	99.06	99.0599975585938	99.06	PASS
CSPP1	2	0.0009298	2	2152	13	0.0006696974	64598	43	0.473411058843673	0.656862613366074	1210.59779643367	1	0.000524	0	0	0.000524	0.004182152	0	0	0.004182152	33.5	33.5	33.5	100	100	100	100	100	100	PASS
CST6	0	0	0	0	0	0	0	0	0	0	0	1	0.000131	0	0	0.000131	0	0	0	0	39.27	39.2700004577637	39.27	100	100	100	100	100	100	PASS
CSTA	0	0	0	2152	2	0.0000619617	64598	4	0	1	1843	1	0	0	0	0	0.012081784	0	0	0.012081784	35.83	35.8300018310547	35.83	100	100	100	100	100	100	PASS
CSTB	0	0	0	2152	6	0.0006348504	64598	41	0	0.643566811715534	1186.09363399173	1	0	0	0	0	0	0	0	0	44.51	44.5099983215332	44.51	100	100	100	100	100	100	PASS
CTC1	2	0.003252788	7	2152	12	0.0010533823	64598	68	1.626647674817	0.0105760807178268	19.4917167629548	0.341959943209734	0.000656	0	0	0.000656	0	0	0	0	36.59	36.5900001525879	36.59	100	100	100	99.26	99.2600021362305	99.26	PASS
CTDP1	0	0	0	2152	1	0.0000309741	64598	2	0	1	1843	1	0	0	0	0	0.000929368	0	0	0.000929368	45.02	45.0200004577637	45.02	100	100	100	100	100	100	PASS
CTH	0	0	0	2152	2	0.0001858765	64598	12	0	1	1843	1	0	0	0	0	0.00325279	0	0	0.00325279	35.74	35.7400016784668	35.74	100	100	100	99.11	99.1100006103516	99.11	PASS
CTNNA2	0	0	0	2152	1	0.0000154861	64598	1	0	1	1843	1	0.012792	0.000263	0.000131	0.013186	0.018587364	0	0	0.018587364	36.98	36.9799995422363	36.98	100	100	100	100	100	100	PASS
CTNS	2	0.001394052	3	2152	13	0.0007934832	64598	51	0.813012793582766	0.252425578229222	465.220340676456	1	0	0	0	0	0.002788104	0	0	0.002788104	43.47	43.4700012207031	43.47	100	100	100	100	100	100	PASS
CTPS1	0	0	0	2152	1	0.000278715	64598	18	0	1	1843	1	0	0	0	0	0	0	0	0	38.77	38.7700004577637	38.77	100	100	100	100	100	100	PASS
CTSA	0	0	0	2152	6	0.0002478257	64598	16	0	1	1843	1	0	0	0	0	0	0	0	0	39.78	39.7799987792969	39.78	100	100	100	100	100	100	PASS
CTSC	0	0	0	2152	6	0.0002632428	64598	17	0	1	1843	1	0.004459	0	0	0.004459	0	0	0	0	32.7	32.7000007629395	32.7	100	100	100	99.06	99.0599975585938	99.06	PASS
CTSD	0	0	0	2152	2	0.0000464641	64598	3	0	1	1843	1	0	0	0	0	0.00185874	0.00139405	0	0.00325279	40.87	40.8699989318848	40.87	100	100	100	100	100	100	PASS
CTSF	0	0	0	2152	3	0.0002168321	64598	14	0	1	1843	1	0	0	0	0	0	0	0	0	41.33	41.3300018310547	41.33	100	100	100	100	100	100	PASS
CTSK	0	0	0	2152	5	0.0000929306	64598	6	0	1	1843	1	0	0	0	0	0	0	0	0	32.28	32.2799987792969	32.28	100	100	100	99.39	99.3899993896484	99.39	PASS
CTU2	0	0	0	2152	1	0.00108423	64598	70	0	0.176173585500762	324.687918077904	1	0.000131	0	0	0.000131	0	0	0	0	41.63	41.6300010681152	41.63	100	100	100	100	100	100	PASS
CUBN	3	0.0018596	4	2152	15	0.0015951952	64598	103	0.221259357235747	0.779689394638243	1436.96755431828	1	0.008132	0.006055	0	0.014187	0	0	0	0	35.81	35.810001373291	35.81	100	100	100	99.95	99.9499969482422	99.95	PASS
CUL7	0	0	0	2152	6	0.0001703617	64598	11	0	1	1843	1	0	0	0	0	0.000464684	0	0	0.000464684	34.94	34.939998626709	34.94	100	100	100	99.13	99.129997253418	99.13	PASS
CWC27	0	0	0	2152	1	0.0000154871	64598	1	0	1	1843	1	0.000655	0	0	0.000655	0.011617104	0	0	0.011617104	35.68	35.6800003051758	35.68	100	100	100	100	100	100	PASS
CWF19L1	0	0	0	2152	3	0.0002943185	64598	19	0	1	1843	1	0	0	0	0	0	0	0	0	37.76	37.7599983215332	37.76	100	100	100	100	100	100	PASS
CYB5A	0	0	0	0	0	0	0	0	0	0	0	1	0	0.000131	0	0.000131	0	0	0	0	45.15	45.1500015258789	45.15	100	100	100	100	100	100	PASS
CYB5R3	0	0	0	2152	9	0.0005421509	64598	35	0	0.629605997875451	1160.36385408446	1	0	0.000262	0	0.000262	0	0	0	0	44.73	44.7299995422363	44.73	100	100	100	100	100	100	PASS
CYBA	0	0	0	2152	2	0.0001084512	64598	7	0	1	1843	1	0	0	0	0	0	0	0	0	44.61	44.6100006103516	44.61	100	100	100	100	100	100	PASS
CYBC1	0	0	0	2152	1	0.0000154899	64598	1	0	1	1843	1	0	0	0	0	0.000464684	0	0	0.000464684	37.37	37.3699989318848	37.37	100	100	100	100	100	100	PASS
CYC1	0	0	0	0	0	0	0	0	0	0	0	1	0.000131	0	0	0.000131	0	0	0	0	33.23	33.2299995422363	33.23	100	100	100	99.27	99.2699966430664	99.27	PASS
CYP11B1	1	0.000464684	1	2152	16	0.0006039634	64598	39	-0.378211154488049	1	1843	1	0	0	0	0	0.000464684	0	0	0.000464684	39.41	39.4099998474121	39.41	100	100	100	100	100	100	PASS
CYP11B2	0	0	0	2152	6	0.0002788704	64598	18	0	1	1843	1	0	0	0	0	0.000464684	0	0	0.000464684	34	34	34	100	100	100	100	100	100	PASS
CYP17A1	1	0.000464684	1	2152	8	0.0003097418	64598	20	0.585183881377339	0.497566813579624	917.015637427247	1	0	0	0	0	0	0	0	0	38.12	38.1199989318848	38.12	100	100	100	100	100	100	PASS
CYP1B1	1	0.000464684	1	2152	16	0.0019047254	64598	123	-2.03526114665397	0.19479473775494	359.006701682354	1	0	0	0	0	0	0	0	0	40.05	40.0499992370605	40.05	100	100	100	100	100	100	PASS
CYP21A2	9	0.026169605	56	2152	19	0.0285584228	64598	1845	-0.126024156913944	0.552890720367111	1018.97759763659	1	0	0	0	0	0.000464684	0	0	0.000464684	39.26	39.2599983215332	39.26	100	100	100	99.44	99.4400024414062	99.44	PASS
CYP24A1	3	0.004182154	9	2152	11	0.0019510896	64598	126	1.09996615501686	0.0431621944018208	79.5479242825558	0.743438544696783	0	0	0	0	0	0	0	0	39.47	39.4700012207031	39.47	100	100	100	100	100	100	PASS
CYP26C1	0	0	0	0	0	0	0	0	0	0	0	1	0	0	0	0	0.000464684	0	0	0.000464684	43.39	43.3899993896484	43.39	100	100	100	100	100	100	PASS
CYP27A1	3	0.003252792	7	2152	21	0.0012078883	64598	78	1.42919152512342	0.0199982929871904	36.8568539753918	0.491424719671891	0.000131	0	0	0.000131	0	0	0	0	41.31	41.310001373291	41.31	100	100	100	100	100	100	PASS
CYP27B1	0	0	0	2152	6	0.000232353	64598	15	0	1	1843	1	0	0	0	0	0.00557621	0	0	0.00557621	36.12	36.1199989318848	36.12	100	100	100	97.83	97.8300018310547	97.83	PASS
CYP2C19	0	0	0	0	0	0	0	0	0	0	0	1	0.000524	0	0	0.000524	0.007899628	0	0	0.007899628	35.07	35.0699996948242	35.07	100	100	100	99.08	99.0800018310547	99.08	PASS
CYP2R1	0	0	0	2152	1	0.0000309828	64598	2	0	1	1843	1	0	0	0	0	0	0	0	0	38.96	38.9599990844727	38.96	100	100	100	100	100	100	PASS
CYP2U1	0	0	0	2152	5	0.000154887	64598	10	0	1	1843	1	0	0	0	0	0.00139405	0	0	0.00139405	39.16	39.1599998474121	39.16	100	100	100	100	100	100	PASS
CYP4F22	1	0.000464684	1	2152	11	0.0004956412	64598	32	-0.0930461451531253	1	1843	1	0.000131	0.006394	0	0.006525	0.00836431	0	0	0.00836431	39.73	39.7299995422363	39.73	100	100	100	97.89	97.8899993896484	97.89	PASS
CYP4V2	0	0	0	2152	10	0.0003562201	64598	23	0	1	1843	1	0	0.000918	0	0.000918	0	0	0	0	37.48	37.4799995422363	37.48	100	100	100	99.87	99.870002746582	99.87	PASS
CYP7B1	1	0.00185874	4	2152	12	0.0014254749	64598	92	0.382882344331308	0.554796321964986	1022.48962138147	1	0.000524	0	0	0.000524	0.003717468	0	0	0.003717468	35.51	35.5099983215332	35.51	100	100	100	99.72	99.7200012207031	99.72	PASS
D2HGDH	0	0	0	2152	1	0.0000155029	64598	1	0	1	1843	1	0	0	0	0	0.000464684	0	0	0.000464684	40.95	40.9500007629395	40.95	100	100	100	100	100	100	PASS
DAAM2	1	0.000464684	1	2152	4	0.0019206169	64598	124	-2.04724790147708	0.195887417924819	361.020511235442	1	0	0	0	0	0.000464684	0	0	0.000464684	36.13	36.1300010681152	36.13	100	100	100	100	100	100	PASS
DAG1	0	0	0	2152	1	0.0000154871	64598	1	0	1	1843	1	0.000131	0	0	0.000131	0.007899624	0	0	0.007899624	44.49	44.4900016784668	44.49	100	100	100	100	100	100	PASS
DALRD3	0	0	0	0	0	0	0	0	0	0	0	1	0	0	0	0	0.007899624	0	0	0.007899624	42.46	42.4599990844727	42.46	100	100	100	100	100	100	PASS
DAP3	0	0	0	2152	1	0.0000309943	64598	2	0	1	1843	1	0	0	0	0	0	0	0	0	35.78	35.7799987792969	35.78	100	100	100	98.93	98.9300003051758	98.93	PASS
DARS1	0	0	0	2152	4	0.0000931274	64598	6	0	1	1843	1	0.000262	0	0	0.000262	0.004182158	0	0	0.004182158	38.27	38.3299999237061	38.39	100	100	100	99.94	99.9400024414063	99.94	PASS
DARS2	2	0.00325279	7	2152	7	0.0007125649	64598	46	2.19058435995427	0.00151001571272426	2.78295895855082	0.0732357620671268	0	0	0	0	0.00185874	0	0	0.00185874	35.31	35.310001373291	35.31	100	100	100	99.94	99.9400024414063	99.94	PASS
DBH	0	0	0	2152	5	0.0020291482	64598	131	0	0.0237483099595549	43.7681352554596	0.544723051652785	0.000143	0	0	0.000143	0.000464684	0	0	0.000464684	41.04	41.0400009155273	41.04	100	100	100	100	100	100	PASS
DBT	0	0	0	2152	5	0.0007125094	64598	46	0	0.406053986886351	748.357497831545	1	0	0	0	0	0	0	0	0	36.73	36.7299995422363	36.73	100	100	100	100	100	100	PASS
DCAF17	0	0	0	2152	2	0.0000310035	64598	2	0	1	1843	1	0.000262	0	0	0.000262	0.00325279	0	0	0.00325279	39.03	39.0299987792969	39.03	100	100	100	100	100	100	PASS
DCC	0	0	0	2152	1	0.0000309789	64598	2	0	1	1843	1	0.01378	0.000262	0	0.014042	0.01486989	0.000464684	0.000464684	0.015799258	34.9	34.9000015258789	34.9	100	100	100	99.56	99.5599975585938	99.56	PASS
DCDC2	1	0.000464684	1	2152	4	0.0001084239	64598	7	2.09956716421856	0.230628052185011	425.047500176976	1	0.006825	0.000656	0	0.007481	0.002788104	0	0	0.002788104	37.84	37.8400001525879	37.84	100	100	100	99.72	99.7200012207031	99.72	PASS
DCHS1	0	0	0	2152	1	0.0000309751	64598	2	0	1	1843	1	0	0	0	0	0	0	0	0	42.77	42.7700004577637	42.77	100	100	100	100	100	100	PASS
DCLRE1C	2	0.000929368	2	2152	4	0.000077458	64598	5	3.58476381489419	0.0195852764133734	36.0956644298471	0.487779249051988	0	0	0	0	0.000464684	0	0	0.000464684	36.21	36.2099990844727	36.21	100	100	100	100	100	100	PASS
DCPS	0	0	0	2152	4	0.0002478382	64598	16	0	1	1843	1	0.000131	0.000262	0	0.000393	0	0	0	0	37.96	37.9599990844727	37.96	100	100	100	99.48	99.4800033569336	99.48	PASS
DCT	0	0	0	2152	1	0.0000620059	64598	4	0	1	1843	1	0.000786	0	0	0.000786	0	0	0	0	34.49	34.4900016784668	34.49	100	100	100	99.69	99.6900024414063	99.69	PASS
DDB2	0	0	0	2152	2	0.0000309712	64598	2	0	1	1843	1	0.000393	0	0	0.000393	0	0	0.000464684	0.000464684	34.39	34.3899993896484	34.39	100	100	100	98.27	98.2699966430664	98.27	PASS
DDC	0	0	0	2152	7	0.0002013223	64598	13	0	1	1843	1	0.000131	0	0	0.000131	0.00464684	0	0	0.00464684	37.24	37.2400016784668	37.24	100	100	100	100	100	100	PASS
DDHD1	0	0	0	2152	2	0.0000774281	64598	5	0	1	1843	1	0	0	0	0	0.00743494	0	0	0.00743494	36.41	36.4099998474121	36.41	100	100	100	99.68	99.6800003051758	99.68	PASS
DDHD2	1	0.000465116	1	2152	7	0.0002323098	64598	15	1.00154055386574	0.408085717019449	752.101976466845	1	0.001311	0	0	0.001311	0.0027881	0	0	0.0027881	35.73	35.7299995422363	35.73	100	100	100	99.72	99.7200012207031	99.72	PASS
DDR2	0	0	0	2152	1	0.0000929051	64598	6	0	1	1843	1	0	0	0	0	0.00185874	0	0	0.00185874	35.83	35.8300018310547	35.83	100	100	100	99.57	99.5699996948242	99.57	PASS
DDRGK1	0	0	0	0	0	0	0	0	0	0	0	1	0.000131	0	0	0.000131	0	0	0	0	40.04	40.0400009155273	40.04	100	100	100	100	100	100	PASS
DDX11	3	0.001394052	3	2152	7	0.0003872345	64598	25	1.84800497874508	0.0602615659704055	111.062066083457	0.927942746178418	0	0	0	0	0.00697026	0	0	0.00697026	40.09	40.0900001525879	40.09	100	100	100	99.72	99.7200012207031	99.72	PASS
DDX59	0	0	0	2152	1	0.0000154861	64598	1	0	1	1843	1	0.000266	0.000131	0	0.000397	0.00325279	0	0	0.00325279	38.32	38.3199996948242	38.32	100	100	100	100	100	100	PASS
DEAF1	0	0	0	0	0	0	0	0	0	0	0	1	0.000393	0.000131	0	0.000524	0.003717474	0.000464684	0	0.004182158	39.31	39.310001373291	39.31	100	100	100	98.21	98.2099990844727	98.21	PASS
DEGS1	0	0	0	2152	2	0.0000464545	64598	3	0	1	1843	1	0	0	0	0	0	0	0	0	43.57	43.5699996948242	43.57	100	100	100	100	100	100	PASS
DENND5A	0	0	0	2152	2	0.000046466	64598	3	0	1	1843	1	0.000525	0	0	0.000525	0.001394052	0	0	0.001394052	36.79	36.7900009155273	36.79	100	100	100	99.44	99.4400024414062	99.44	PASS
DGAT1	0	0	0	2152	5	0.0001703879	64598	11	0	1	1843	1	0	0	0	0	0	0	0	0	42.23	42.2299995422363	42.23	100	100	100	100	100	100	PASS
DGKE	0	0	0	2152	1	0.000325208	64598	21	0	1	1843	1	0	0	0	0	0.000464684	0	0	0.000464684	40.21	40.2099990844727	40.21	100	100	100	99.69	99.6900024414063	99.69	PASS
DGUOK	0	0	0	2152	6	0.0001858438	64598	12	0	1	1843	1	0.000133	0	0	0.000133	0.000929368	0	0	0.000929368	36.67	36.6699981689453	36.67	100	100	100	100	100	100	PASS
DHCR24	0	0	0	2152	1	0.0000464641	64598	3	0	1	1843	1	0	0	0	0	0	0	0	0	38.57	38.5699996948242	38.57	100	100	100	98.9	98.9000015258789	98.9	PASS
DHCR7	3	0.014869904	32	2152	43	0.0101287216	64598	654	0.553943238000895	0.0382469731716753	70.4891715553975	0.684360888887354	0	0	0	0	0.000464684	0	0	0.000464684	41.65	41.6500015258789	41.65	100	100	100	100	100	100	PASS
DHDDS	0	0	0	2152	4	0.0001858406	64598	12	0	1	1843	1	0	0	0	0	0.000464684	0	0	0.000464684	36.79	36.7900009155273	36.79	100	100	100	100	100	100	PASS
DHFR	0	0	0	2152	2	0.0000443298	64598	3	0	1	1843	1	0	0	0	0	0.01254647	0	0	0.01254647	33.99	33.9900016784668	33.99	100	100	100	97.91	97.9100036621094	97.91	PASS
DHH	0	0	0	2152	1	0.0000154871	64598	1	0	1	1843	1	0	0	0	0	0.00697026	0	0	0.00697026	39.42	39.4199981689453	39.42	100	100	100	100	100	100	PASS
DHODH	1	0.000464684	1	2152	6	0.0010221404	64598	66	-1.13727150083708	0.726801930814563	1339.49595849124	1	0	0.000131	0	0.000131	0.008829	0	0	0.008829	39.02	39.0200004577637	39.02	100	100	100	100	100	100	PASS
DHPS	0	0	0	0	0	0	0	0	0	0	0	1	0.000138	0	0	0.000138	0.00836431	0	0	0.00836431	41.19	41.189998626709	41.19	100	100	100	100	100	100	PASS
DHTKD1	1	0.000464684	1	2152	7	0.0003717116	64598	24	0.322066259755395	0.559313230855569	1030.81428446681	1	0.000798	0	0	0.000798	0	0	0	0	37.36	37.3600006103516	37.36	100	100	100	99.92	99.9199981689453	99.92	PASS
DHX37	0	0	0	2152	4	0.0001238988	64598	8	0	1	1843	1	0	0	0	0	0	0	0	0	42.3	42.2999992370606	42.3	100	100	100	100	100	100	PASS
DHX38	0	0	0	0	0	0	0	0	0	0	0	1	0	0	0	0	0.008829	0	0	0.008829	38.6	38.5999984741211	38.6	100	100	100	100	100	100	PASS
DIABLO	0	0	0	2152	1	0.0000154904	64598	1	0	1	1843	1	0	0	0	0	0	0	0	0	38.34	38.3400001525879	38.34	100	100	100	100	100	100	PASS
DIAPH1	0	0	0	0	0	0	0	0	0	0	0	1	0.001573	0	0	0.001573	0.007434944	0	0	0.007434944	36.84	36.8400001525879	36.84	100	100	100	97.6	97.5999984741211	97.6	PASS
DIS3L2	0	0	0	2152	4	0.0000774281	64598	5	0	1	1843	1	0.001209	0.000262	0	0.001471	0.000929368	0	0	0.000929368	37.67	37.6699981689453	37.67	100	100	100	99.89	99.8899993896485	99.89	PASS
DLAT	0	0	0	2152	2	0.0000775007	64598	5	0	1	1843	1	0.000131	0	0	0.000131	0	0	0	0	38.29	38.2900009155273	38.29	100	100	100	99.84	99.8399963378906	99.84	PASS
DLD	1	0.000464684	1	2152	5	0.0000774405	64598	5	2.58508979821002	0.178507578700088	328.989467544262	1	0	0	0	0	0.00464684	0	0	0.00464684	37.45	37.4500007629395	37.45	100	100	100	100	100	100	PASS
DLL3	0	0	0	2152	3	0.0001086586	64598	7	0	1	1843	1	0	0	0	0	0.000464684	0	0.000464684	0.000929368	42.65	42.6500015258789	42.65	100	100	100	100	100	100	PASS
DLX5	0	0	0	0	0	0	0	0	0	0	0	1	0	0	0	0	0.00464684	0	0	0.00464684	43.75	43.75	43.75	100	100	100	100	100	100	PASS
DMGDH	1	0.000464684	1	2152	1	0.000061931	64598	4	2.90751632427027	0.151138487767055	278.548232954682	1	0	0	0	0	0.01254647	0	0	0.01254647	35.89	35.8899993896484	35.89	100	100	100	100	100	100	PASS
DMP1	0	0	0	2152	2	0.0000464669	64598	3	0	1	1843	1	0	0	0	0	0.001858734	0	0	0.001858734	39.56	39.560001373291	39.56	100	100	100	100	100	100	PASS
DMXL2	0	0	0	2152	1	0.0000619751	64598	4	0	1	1843	1	0.001324	0	0	0.001324	0.00929368	0	0	0.00929368	37.05	37.0499992370605	37.05	100	100	100	100	100	100	PASS
DNA2	1	0.000464684	1	2152	3	0.0003251852	64598	21	0.514988372615632	0.513770206664739	946.878490883114	1	0.005636	0	0	0.005636	0.001394052	0	0	0.001394052	36.41	36.4099998474121	36.41	100	100	100	100	100	100	PASS
DNAAF1	0	0	0	2152	7	0.0002635392	64598	17	0	1	1843	1	0.000131	0	0	0.000131	0.008829	0	0	0.008829	37.94	37.939998626709	37.94	100	100	100	100	100	100	PASS
DNAAF11	0	0	0	2152	3	0.000294318	64598	19	0	0	0	NA	0	0	0	0	0	0	0	0	0	0	0	0	0	0	0	0	0	LOW_DP
DNAAF3	2	0.000929368	2	2152	7	0.0003564582	64598	23	1.38251706158625	0.192153876007328	354.139593481505	1	0.000402	0	0	0.000402	0.000464684	0	0	0.000464684	44.29	44.2900009155273	44.29	100	100	100	100	100	100	PASS
DNAAF4	0	0	0	2152	7	0.000372743	64598	24	0	1	1843	1	0.000131	0	0	0.000131	0.001394052	0.000464684	0	0.001858736	36.44	36.439998626709	36.44	100	100	100	99.85	99.8499984741211	99.85	PASS
DNAAF5	0	0	0	2152	1	0.0000309665	64598	2	0	1	1843	1	0.000131	0	0	0.000131	0	0.00836431	0	0.00836431	40.05	40.0499992370605	40.05	100	100	100	100	100	100	PASS
DNAH1	0	0	0	2152	13	0.000697044	64598	45	0	0.405325979328576	747.015779902566	1	0.001586	0.006959	0	0.008545	0.007899624	0	0	0.007899624	40.04	40.0400009155273	40.04	100	100	100	100	100	100	PASS
DNAH11	3	0.001394052	3	2152	37	0.0013166912	64598	85	0.0823673427333677	0.762361687471657	1405.03259001026	1	0.001573	0	0	0.001573	0.002788104	0	0	0.002788104	36.39	36.3899993896484	36.39	100	100	100	99.76	99.7600021362305	99.76	PASS
DNAH17	2	0.000929368	2	2152	2	0.0000309707	64598	2	4.90727407452843	0.00596909988143367	11.0010510814822	0.229188564197547	0.000935	0.000526	0	0.001461	0.000464684	0	0	0.000464684	40.16	40.1599998474121	40.16	100	100	100	100	100	100	PASS
DNAH2	0	0	0	2152	1	0.0000464698	64598	3	0	1	1843	1	0.000393	0	0	0.000393	0.003252788	0.000464684	0	0.003717472	37.67	37.6699981689453	37.67	100	100	100	99.32	99.3199996948242	99.32	PASS
DNAH8	2	0.001394052	3	2152	13	0.0012893817	64598	83	0.112604963868706	0.757725934562178	1396.48889739809	1	0.000524	0	0	0.000524	0.001858736	0	0	0.001858736	35.24	35.2400016784668	35.24	100	100	100	99.31	99.3099975585938	99.31	PASS
DNAH9	0	0	0	2152	2	0.0000619521	64598	4	0	1	1843	1	0.00079	0	0	0.00079	0.005576206	0	0	0.005576206	36.87	36.8699989318848	36.87	100	100	100	99.78	99.7799987792969	99.78	PASS
DNAI1	0	0	0	2152	8	0.0012699482	64598	82	0	0.117214876905599	216.02701813702	1	0.000262	0	0	0.000262	0.000464684	0	0	0.000464684	37.22	37.2200012207031	37.22	100	100	100	100	100	100	PASS
DNAJB13	0	0	0	0	0	0	0	0	0	0	0	1	0	0	0	0	0	0	0	0	39.34	39.3400001525879	39.34	100	100	100	99.95	99.9499969482422	99.95	PASS
DNAJB2	1	0.00139405	3	2152	1	0.000263305	64598	17	2.40447548422414	0.02532121105909	46.6669919819029	0.554215410993867	0	0	0	0	0	0	0	0	40.06	40.060001373291	40.06	100	100	100	100	100	100	PASS
DNAJC12	0	0	0	2152	3	0.0000619425	64598	4	0	1	1843	1	0	0	0	0	0.000929368	0	0	0.000929368	39.17	39.1699981689453	39.17	100	100	100	100	100	100	PASS
DNAJC19	0	0	0	2152	3	0.0001084507	64598	7	0	1	1843	1	0	0	0	0	0.004646844	0	0	0.004646844	38.17	38.1699981689453	38.17	100	100	100	100	100	100	PASS
DNAJC21	0	0	0	2152	2	0.0000619637	64598	4	0	1	1843	1	0.000263	0	0	0.000263	0.00929368	0	0	0.00929368	35.77	35.7700004577637	35.77	100	100	100	99.46	99.4599990844727	99.46	PASS
DNAJC3	0	0	0	2152	3	0.0000464804	64598	3	0	1	1843	1	0.000918	0	0	0.000918	0	0	0	0	37.24	37.2400016784668	37.24	100	100	100	100	100	100	PASS
DNAJC6	0	0	0	0	0	0	0	0	0	0	0	1	0.000787	0.000131	0	0.000918	0.000464684	0	0	0.000464684	34.95	34.9500007629395	34.95	100	100	100	99.16	99.1600036621094	99.16	PASS
DNAL1	0	0	0	0	0	0	0	0	0	0	0	1	0	0	0	0	0.00743494	0	0	0.00743494	36.68	36.6800003051758	36.68	100	100	100	99.41	99.4100036621094	99.41	PASS
DNAL4	0	0	0	0	0	0	0	0	0	0	0	1	0.000135	0	0	0.000135	0	0	0	0	41.13	41.1300010681152	41.13	100	100	100	100	100	100	PASS
DNASE1L3	0	0	0	0	0	0	0	0	0	0	0	1	0	0	0	0	0.007899624	0	0	0.007899624	32.35	32.3499984741211	32.35	100	100	100	100	100	100	PASS
DNM1L	0	0	0	2152	1	0.0000154919	64598	1	0	1	1843	1	0	0	0	0	0	0	0	0	36.28	36.2799987792969	36.28	100	100	100	99.02	99.0199966430664	99.02	PASS
DNM2	0	0	0	2152	1	0.000108413	64598	7	0	1	1843	1	0.000524	0.008455	0	0.008979	0.00836431	0	0	0.00836431	45.9	45.9000015258789	45.9	100	100	100	100	100	100	PASS
DNMBP	0	0	0	2152	1	0.000015488	64598	1	0	1	1843	1	0	0	0	0	0	0	0	0	35.55	35.5499992370606	35.55	100	100	100	99.89	99.8899993896485	99.89	PASS
DNMT3B	0	0	0	2152	3	0.0000774291	64598	5	0	1	1843	1	0	0	0	0	0	0	0	0	39.38	39.3800010681152	39.38	100	100	100	100	100	100	PASS
DOCK2	0	0	0	0	0	0	0	0	0	0	0	1	0.002623	0.005707	0	0.00833	0.001858736	0	0	0.001858736	35.17	35.1699981689453	35.17	100	100	100	99.9	99.9000015258789	99.9	PASS
DOCK3	2	0.001394052	3	2152	2	0.001533468	64598	99	-0.137513684484498	1	1843	1	0.001968	0.000131	0	0.002099	0.010687728	0	0	0.010687728	36.42	36.4199981689453	36.42	100	100	100	99.67	99.6699981689453	99.67	PASS
DOCK6	2	0.001397533	3	2152	10	0.0009609247	64598	62	0.540387061839535	0.468288429948492	863.05557639507	1	0	0.000262	0	0.000262	0.010687728	0	0	0.010687728	36.17	36.1699981689453	36.17	100	100	100	99.84	99.8399963378906	99.84	PASS
DOCK7	0	0	0	2152	2	0.0000620088	64598	4	0	1	1843	1	0.00174	0.000265	0	0.002005	0	0	0	0	36.02	36.0200004577637	36.02	100	100	100	99.96	99.9599990844727	99.96	PASS
DOCK8	0	0	0	2152	3	0.0000464661	64598	3	0	1	1843	1	0.002625	0.002375	0	0.005	0.000464684	0	0	0.000464684	36.23	36.2299995422363	36.23	100	100	100	99.4	99.4000015258789	99.4	PASS
DOK7	3	0.001858736	4	2152	7	0.0018990563	64598	123	-0.0309608007576674	1	1843	1	0.009837	0.002503	0	0.01234	0.0232342	0.00139405	0	0.02462825	44.75	44.75	44.75	100	100	100	100	100	100	PASS
DOLK	0	0	0	2152	1	0.0000309895	64598	2	0	1	1843	1	0	0	0	0	0.000929368	0	0	0.000929368	30.81	30.8099994659424	30.81	100	100	100	100	100	100	PASS
DONSON	0	0	0	2152	5	0.0002013569	64598	13	0	1	1843	1	0	0	0	0	0	0	0	0	34.63	34.6300010681152	34.63	100	100	100	99.33	99.3300018310547	99.33	PASS
DPAGT1	0	0	0	2152	4	0.0000929469	64598	6	0	1	1843	1	0	0	0	0	0	0	0	0	37.22	37.2200012207031	37.22	100	100	100	100	100	100	PASS
DPH1	0	0	0	2152	1	0.0000154899	64598	1	0	1	1843	1	0	0	0	0	0	0	0	0	38	38	38	100	100	100	99.82	99.8199996948242	99.82	PASS
DPM1	0	0	0	2152	3	0.0001704091	64598	11	0	1	1843	1	0	0	0	0	0	0	0	0	36.91	36.9099998474121	36.91	100	100	100	100	100	100	PASS
DPM2	0	0	0	0	0	0	0	0	0	0	0	1	0	0	0	0	0.000464684	0	0	0.000464684	36.93	36.9300003051758	36.93	100	100	100	100	100	100	PASS
DPM3	0	0	0	2152	1	0.0000309703	64598	2	0	1	1843	1	0	0	0	0	0	0	0	0	34.7	34.7000007629395	34.7	100	100	100	100	100	100	PASS
DPY19L2	1	0.000464684	1	2152	3	0.0004958054	64598	32	-0.093524013608935	1	1843	1	0.000395	0.000131	0	0.000526	0.00557621	0	0	0.00557621	37.76	37.7599983215332	37.76	100	100	100	100	100	100	PASS
DPYD	1	0.000464684	1	2152	11	0.0003098929	64598	20	0.584480269313653	0.497566813579624	917.015637427247	1	0.002884	0.000917	0	0.003801	0.00232342	0.000464684	0	0.002788104	35.75	35.75	35.75	100	100	100	99.96	99.9599990844727	99.96	PASS
DPYS	2	0.000929368	2	2152	7	0.0007124445	64598	46	0.383472339389463	0.668265667842297	1231.61362583335	1	0.000131	0	0	0.000131	0.0027881	0	0	0.0027881	37.02	37.0200004577637	37.02	100	100	100	99.62	99.620002746582	99.62	PASS
DRAM2	0	0	0	2152	3	0.0000775055	64598	5	0	1	1843	1	0	0	0	0	0	0	0	0	35.96	35.9599990844727	35.96	100	100	100	100	100	100	PASS
DRC1	0	0	0	2152	2	0.0000774368	64598	5	0	1	1843	1	0	0	0	0	0.000929368	0	0	0.000929368	37.06	37.060001373291	37.06	100	100	100	99.96	99.9599990844727	99.96	PASS
DSC3	0	0	0	0	0	0	0	0	0	0	0	1	0.000525	0	0	0.000525	0.000929368	0	0	0.000929368	35.02	35.0200004577637	35.02	100	100	100	99.79	99.7900009155273	99.79	PASS
DSE	0	0	0	0	0	0	0	0	0	0	0	1	0	0	0	0	0.000464684	0	0	0.000464684	34.39	34.3899993896484	34.39	100	100	100	99.83	99.8300018310547	99.83	PASS
DSG1	0	0	0	0	0	0	0	0	0	0	0	1	0.004271	0.000133	0	0.004404	0	0	0	0	37.2	37.2000007629395	37.2	100	100	100	99.71	99.7099990844727	99.71	PASS
DSG3	0	0	0	0	0	0	0	0	0	0	0	1	0.000131	0	0	0.000131	0	0	0	0	37.78	37.7799987792969	37.78	100	100	100	100	100	100	PASS
DSG4	0	0	0	2152	4	0.0000619435	64598	4	0	1	1843	1	0	0	0	0	0	0	0	0	35.96	35.9599990844727	35.96	100	100	100	99.8	99.8000030517578	99.8	PASS
DSP	0	0	0	2152	8	0.0001858457	64598	12	0	1	1843	1	0	0	0	0	0	0	0	0	36.48	36.4799995422363	36.48	100	100	100	99.74	99.7399978637695	99.74	PASS
DST	0	0	0	2152	10	0.0003718335	64598	24	0	1	1843	1	0.004727	0.000131	0	0.004858	0.001394052	0	0	0.001394052	35.86	35.8600006103516	35.86	100	100	100	99.91	99.9100036621094	99.91	PASS
DSTYK	0	0	0	0	0	0	0	0	0	0	0	1	0.000524	0	0	0.000524	0.002323424	0	0	0.002323424	35.13	35.1300010681152	35.13	100	100	100	99.99	99.9899978637695	99.99	PASS
DTNBP1	0	0	0	0	0	0	0	0	0	0	0	1	0.000393	0	0	0.000393	0.001858736	0	0	0.001858736	38.13	38.1300010681152	38.13	100	100	100	100	100	100	PASS
DUOX2	1	0.00139795	3	2152	17	0.0054851587	64598	354	-1.97222060092095	0.006115584831302	11.2710228440896	0.230020874369175	0	0	0	0	0.000464684	0	0	0.000464684	36.83	36.8300018310547	36.83	100	100	100	99.48	99.4800033569336	99.48	PASS
DUOXA2	0	0	0	2152	2	0.0000309779	64598	2	0	1	1843	1	0	0	0	0	0	0	0	0	43.11	43.1100006103516	43.11	100	100	100	100	100	100	PASS
DYM	0	0	0	2152	3	0.0000774896	64598	5	0	1	1843	1	0.007747	0.000393	0	0.00814	0.001394052	0	0	0.001394052	37.12	37.1199989318848	37.12	100	100	100	100	100	100	PASS
DYNC1I2	0	0	0	0	0	0	0	0	0	0	0	1	0	0	0	0	0.00325279	0	0	0.00325279	36.05	36.0499992370606	36.05	100	100	100	99.95	99.9499969482422	99.95	PASS
DYNC2I1	0	0	0	2152	3	0.0000465125	64598	3	0	0	0	NA	0	0	0	0	0	0	0	0	0	0	0	0	0	0	0	0	0	LOW_DP
DYNC2I2	0	0	0	2152	8	0.0002168203	64598	14	0	0	0	NA	0	0	0	0	0	0	0	0	0	0	0	0	0	0	0	0	0	LOW_DP
DYNC2LI1	1	0.00139405	3	2152	16	0.0005731705	64598	37	1.28224604303005	0.13773075736386	253.837785821595	1	0	0	0	0	0	0	0	0	37.14	37.1399993896484	37.14	100	100	100	100	100	100	PASS
DYSF	0	0	0	2152	39	0.0010532639	64598	68	0	0.175949321913637	324.274600286833	1	0.007776	0	0	0.007776	0.001394052	0.000464684	0	0.001858736	37.25	37.25	37.25	100	100	100	99.57	99.5699996948242	99.57	PASS
DZIP1	0	0	0	2152	1	0.0000155458	64598	1	0	1	1843	1	0.000408	0.000131	0	0.000539	0	0	0	0	37.26	37.2599983215332	37.26	100	100	100	99.49	99.4899978637695	99.49	PASS
DZIP1L	1	0.000464684	1	2152	2	0.0005264806	64598	34	-0.180130400311494	1	1843	1	0	0	0	0	0.012081784	0	0	0.012081784	38.4	38.4000015258789	38.4	100	100	100	100	100	100	PASS
EARS2	2	0.000929368	2	2152	11	0.0010530554	64598	68	-0.18025946090194	1	1843	1	0	0	0	0	0.000929368	0	0	0.000929368	35.17	35.1699981689453	35.17	100	100	100	99.34	99.3399963378906	99.34	PASS
ECEL1	0	0	0	2152	6	0.0001860077	64598	12	0	1	1843	1	0	0	0	0	0	0	0	0	43.36	43.3600006103516	43.36	100	100	100	100	100	100	PASS
ECHS1	1	0.000465116	1	2152	17	0.0010842106	64598	70	-1.22098254233152	0.730672392026912	1346.6292185056	1	0	0	0	0	0	0	0	0	38.9	38.9000015258789	38.9	100	100	100	100	100	100	PASS
ECM1	0	0	0	2152	5	0.0003873731	64598	25	0	1	1843	1	0	0	0	0	0	0	0	0	37.98	37.9799995422363	37.98	100	100	100	100	100	100	PASS
EDAR	0	0	0	2152	6	0.0001703841	64598	11	0	1	1843	1	0	0	0	0	0.001858736	0	0	0.001858736	37	37	37	100	100	100	99.98	99.9800033569336	99.98	PASS
EDARADD	0	0	0	0	0	0	0	0	0	0	0	1	0.000262	0.000656	0	0.000918	0.001858734	0	0	0.001858734	35.14	35.1399993896484	35.14	100	100	100	99.57	99.5699996948242	99.57	PASS
EDC3	0	0	0	0	0	0	0	0	0	0	0	1	0	0	0	0	0	0	0	0	37.98	37.9799995422363	37.98	100	100	100	100	100	100	PASS
EDNRB	0	0	0	2152	3	0.0001086071	64598	7	0	1	1843	1	0	0	0	0	0	0	0	0	35.64	35.6399993896484	35.64	100	100	100	100	100	100	PASS
EFEMP2	1	0.000464684	1	2152	1	0.0000154885	64598	1	4.9069806341331	0.0634404698960828	116.920786018481	0.927942746178418	0	0	0	0	0	0	0	0	40.49	40.4900016784668	40.49	100	100	100	100	100	100	PASS
EFL1	0	0	0	0	0	0	0	0	0	0	0	1	0.000787	0	0	0.000787	0	0	0	0	36.44	36.439998626709	36.44	100	100	100	99.19	99.1900024414063	99.19	PASS
EGFR	0	0	0	0	0	0	0	0	0	0	0	1	0.001049	0.003683	0	0.004732	0.005111524	0	0	0.005111524	38.03	38.0299987792969	38.03	100	100	100	100	100	100	PASS
EIF2AK3	0	0	0	0	0	0	0	0	0	0	0	1	0.000131	0.000393	0	0.000524	0.001858736	0	0	0.001858736	36.28	36.2799987792969	36.28	100	100	100	99.51	99.5100021362305	99.51	PASS
EIF2AK4	0	0	0	2152	9	0.000325263	64598	21	0	1	1843	1	0	0	0	0	0.000464684	0	0	0.000464684	36.69	36.689998626709	36.69	100	100	100	96.98	96.9800033569336	96.98	PASS
EIF2B1	0	0	0	2152	1	0.0000154875	64598	1	0	1	1843	1	0	0	0	0	0	0	0	0	33.75	33.75	33.75	100	100	100	100	100	100	PASS
EIF2B2	1	0.00139405	3	2152	5	0.000743557	64598	48	0.906767060335681	0.226528635556107	417.492275329906	1	0	0	0	0	0.00743494	0	0	0.00743494	36.39	36.3899993896484	36.39	100	100	100	100	100	100	PASS
EIF2B3	0	0	0	2152	3	0.0001239672	64598	8	0	1	1843	1	0.000131	0	0	0.000131	0.001394052	0	0	0.001394052	35.96	35.9599990844727	35.96	100	100	100	100	100	100	PASS
EIF2B4	0	0	0	2152	5	0.000077432	64598	5	0	1	1843	1	0.000131	0	0	0.000131	0	0	0	0	35.08	35.0800018310547	35.08	100	100	100	99.77	99.7699966430664	99.77	PASS
EIF2B5	2	0.000929368	2	2152	8	0.0008362299	64598	54	0.152350341926088	0.702255270363314	1294.25646327959	1	0.000145	0	0	0.000145	0.004646844	0	0	0.004646844	36.1	36.0999984741211	36.1	100	100	100	96.62	96.620002746582	96.62	PASS
EIF4A3	0	0	0	0	0	0	0	0	0	0	0	1	0.000131	0	0	0.000131	0	0	0	0	37.28	37.2799987792969	37.28	100	100	100	99.83	99.8300018310547	99.83	PASS
ELAC2	0	0	0	2152	5	0.0001703453	64598	11	0	1	1843	1	0	0	0	0	0	0	0	0	38.78	38.7799987792969	38.78	100	100	100	99.95	99.9499969482422	99.95	PASS
ELMO2	0	0	0	2152	1	0.0000154842	64598	1	0	1	1843	1	0	0	0	0	0	0	0	0	39.04	39.0400009155273	39.04	100	100	100	97.3	97.3000030517578	97.3	PASS
ELMOD3	0	0	0	0	0	0	0	0	0	0	0	1	0	0.000131	0	0.000131	0.001858736	0	0	0.001858736	38.77	38.7700004577637	38.77	100	100	100	100	100	100	PASS
ELOVL4	0	0	0	0	0	0	0	0	0	0	0	1	0.000131	0	0	0.000131	0	0	0	0	40.51	40.5099983215332	40.51	100	100	100	100	100	100	PASS
ELP1	1	0.000464684	1	2152	6	0.0001084033	64598	7	2.09984129512033	0.230628052185011	425.047500176976	1	0.000131	0	0	0.000131	0.000464684	0	0	0.000464684	35.41	35.4099998474121	35.41	100	100	100	99.35	99.3499984741211	99.35	PASS
ELP2	2	0.000929368	2	2152	4	0.0001238965	64598	8	2.9071145380209	0.0393653413150422	72.5503240436229	0.684437019279461	0.000524	0.001836	0	0.00236	0	0	0	0	37	37	37	100	100	100	100	100	100	PASS
EMC1	0	0	0	2152	1	0.0000154861	64598	1	0	1	1843	1	0	0	0	0	0	0	0	0	34.77	34.7700004577637	34.77	100	100	100	100	100	100	PASS
EMC10	0	0	0	0	0	0	0	0	0	0	0	1	0	0	0	0	0.000464684	0	0	0.000464684	42.39	42.3899993896484	42.39	100	100	100	100	100	100	PASS
EMG1	0	0	0	2152	1	0.0000154856	64598	1	0	1	1843	1	0	0	0	0	0.00139405	0	0	0.00139405	40.22	40.2200012207031	40.22	100	100	100	100	100	100	PASS
EML1	0	0	0	0	0	0	0	0	0	0	0	1	0.001836	0	0	0.001836	0	0	0	0	36.59	36.5900001525879	36.59	100	100	100	99.73	99.7300033569336	99.73	PASS
EMP2	1	0.000464684	1	2152	0	0	64598	0	0	0.0322397003745318	59.4177677902621	0.612554307116105	0	0	0	0	0.000464684	0	0	0.000464684	35.58	35.5800018310547	35.58	100	100	100	100	100	100	PASS
EN1	0	0	0	0	0	0	0	0	0	0	0	1	0	0	0	0	0.005111526	0	0	0.005111526	39.34	39.3400001525879	39.34	100	100	100	99.93	99.9300003051758	99.93	PASS
ENAM	2	0.003252788	7	2152	2	0.000681526	64598	44	2.25483619644717	0.0011991935310978	2.21011367781325	0.0613920466059236	0.000262	0	0	0.000262	0.007899624	0	0	0.007899624	34.17	34.1699981689453	34.17	100	100	100	99.67	99.6699981689453	99.67	PASS
ENO3	0	0	0	2152	1	0.0000154847	64598	1	0	1	1843	1	0.000143	0	0	0.000143	0	0	0	0	41.06	41.060001373291	41.06	100	100	100	100	100	100	PASS
ENPP1	1	0.000929368	2	2152	4	0.0001239071	64598	8	2.90699111311955	0.0393653413150422	72.5503240436229	0.684437019279461	0.003289	0.000131	0	0.00342	0.000464684	0	0	0.000464684	35.82	35.8199996948242	35.82	100	100	100	100	100	100	PASS
ENTPD1	0	0	0	0	0	0	0	0	0	0	0	1	0.000262	0	0	0.000262	0.009293684	0	0	0.009293684	35.59	35.5900001525879	35.59	100	100	100	99.95	99.9499969482422	99.95	PASS
ENTPD5	0	0	0	2152	3	0.0002168008	64598	14	0	1	1843	1	0	0	0	0	0	0	0	0	35.35	35.3499984741211	35.35	100	100	100	100	100	100	PASS
EOGT	0	0	0	2152	4	0.0002323049	64598	15	0	1	1843	1	0	0	0	0	0.007899624	0	0	0.007899624	38.09	38.0900001525879	38.09	100	100	100	98.93	98.9300003051758	98.93	PASS
EPCAM	0	0	0	2152	1	0.0000309837	64598	2	0	1	1843	1	0.000131	0	0	0.000131	0	0	0	0	36.27	36.2700004577637	36.27	100	100	100	100	100	100	PASS
EPG5	0	0	0	2152	5	0.0001085058	64598	7	0	1	1843	1	0.000655	0.000131	0	0.000786	0	0	0	0	35.87	35.8699989318848	35.87	100	100	100	99.91	99.9100036621094	99.91	PASS
EPHB2	0	0	0	2152	1	0.0000154919	64598	1	0	1	1843	1	0.011286	0.000262	0	0.011548	0.000464684	0	0	0.000464684	39.04	39.0400009155273	39.04	100	100	100	99.93	99.9300003051758	99.93	PASS
EPM2A	0	0	0	2152	6	0.0002176406	64598	14	0	1	1843	1	0.000131	0	0	0.000131	0.005576204	0	0	0.005576204	37.05	37.0499992370605	37.05	100	100	100	99.91	99.9100036621094	99.91	PASS
EPO	0	0	0	0	0	0	0	0	0	0	0	1	0	0	0	0	0.00464684	0	0	0.00464684	39.5	39.5	39.5	100	100	100	100	100	100	PASS
EPRS1	0	0	0	2152	2	0.0000774339	64598	5	0	1	1843	1	0.000393	0.000131	0	0.000524	0	0	0	0	37.53	37.5299987792969	37.53	100	100	100	99.38	99.379997253418	99.38	PASS
EPS8	0	0	0	0	0	0	0	0	0	0	0	1	0	0	0	0	0.00139405	0	0	0.00139405	39.88	39.8800010681152	39.88	100	100	100	99.66	99.6600036621094	99.66	PASS
EPS8L2	0	0	0	0	0	0	0	0	0	0	0	1	0	0.009088	0	0.009088	0	0	0	0	37.44	37.439998626709	37.44	100	100	100	100	100	100	PASS
EPX	0	0	0	0	0	0	0	0	0	0	0	1	0.000131	0	0	0.000131	0.000464684	0	0	0.000464684	39.82	39.8199996948242	39.82	100	100	100	100	100	100	PASS
ERAL1	0	0	0	2152	1	0.0000154919	64598	1	0	1	1843	1	0	0	0	0	0	0	0	0	36.21	36.2099990844727	36.21	100	100	100	100	100	100	PASS
ERBB3	1	0.000464684	1	2152	4	0.0003565471	64598	23	0.382157301035242	0.54462685666164	1003.7472968274	1	0.000131	0	0	0.000131	0.006970262	0	0	0.006970262	35.62	35.6199989318848	35.62	100	100	100	99.39	99.3899993896484	99.39	PASS
ERCC1	1	0.000464684	1	2152	2	0.0002168049	64598	14	1.09985260746591	0.388362267551723	715.751659097826	1	0	0	0	0	0.000464684	0	0	0.000464684	38.04	38.0400009155273	38.04	100	100	100	100	100	100	PASS
ERCC2	1	0.00140187	3	2152	16	0.0013481596	64598	87	0.0563612716347314	0.767152720786518	1413.86246440955	1	0	0	0	0	0.000929368	0	0	0.000929368	42.43	42.4300003051758	42.43	100	100	100	100	100	100	PASS
ERCC3	2	0.001394052	3	2152	9	0.0008207868	64598	53	0.764204942025372	0.42938180234407	791.350661720121	1	0	0	0	0	0.004182158	0	0	0.004182158	38.12	38.1199989318848	38.12	100	100	100	99.78	99.7799987792969	99.78	PASS
ERCC4	1	0.000929368	2	2152	4	0.0002942502	64598	19	1.65920657497184	0.145961614274758	269.007255108379	1	0.00092	0.000131	0	0.001051	0	0	0	0	36.11	36.1100006103516	36.11	100	100	100	99.97	99.9700012207031	99.97	PASS
ERCC5	0	0	0	2152	8	0.0002168054	64598	14	0	1	1843	1	0	0	0	0	0.000464684	0	0	0.000464684	37.15	37.1500015258789	37.15	100	100	100	100	100	100	PASS
ERCC6	1	0.000464684	1	2152	24	0.0007436041	64598	48	-0.67828475402113	1	1843	1	0.000131	0	0	0.000131	0.000464684	0	0	0.000464684	37.79	37.7900009155273	37.79	100	100	100	99.94	99.9400024414063	99.94	PASS
ERCC6L2	1	0.00139405	3	2152	2	0.0005576443	64598	36	1.32186522640049	0.130345056181992	240.225938543412	1	0.000934	0.000131	0	0.001065	0.000929368	0.000464684	0	0.001394052	35.14	35.1399993896484	35.14	100	100	100	98.99	98.9899978637695	98.99	PASS
ERCC8	1	0.000464684	1	2152	10	0.000341477	64598	22	0.444461560988795	0.529451277808149	975.778705000419	1	0.000131	0.000131	0	0.000262	0.009758364	0	0	0.009758364	36.72	36.7200012207031	36.72	100	100	100	100	100	100	PASS
ERGIC1	0	0	0	0	0	0	0	0	0	0	0	1	0.000131	0.000394	0	0.000525	0.000464684	0	0	0.000464684	38.08	38.0800018310547	38.08	100	100	100	99.28	99.2799987792969	99.28	PASS
ERLIN1	0	0	0	2152	1	0.000015488	64598	1	0	1	1843	1	0	0	0	0	0	0	0	0	39.16	39.1599998474121	39.16	100	100	100	100	100	100	PASS
ERLIN2	0	0	0	2152	2	0.0000309732	64598	2	0	1	1843	1	0.000131	0	0	0.000131	0.0027881	0	0	0.0027881	39.89	39.8899993896484	39.89	100	100	100	99.71	99.7099990844727	99.71	PASS
ESCO2	0	0	0	2152	12	0.0002169585	64598	14	0	1	1843	1	0	0	0	0	0	0	0	0	37.7	37.7000007629395	37.7	100	100	100	100	100	100	PASS
ESPN	0	0	0	2152	1	0.0000154875	64598	1	0	1	1843	1	0.000262	0	0	0.000262	0	0	0	0	44.89	44.8899993896484	44.89	100	100	100	99.97	99.9700012207031	99.97	PASS
ESR1	0	0	0	0	0	0	0	0	0	0	0	1	0.002622	0	0	0.002622	0.007434938	0	0	0.007434938	37.31	37.310001373291	37.31	100	100	100	99.92	99.9199981689453	99.92	PASS
ESRP1	0	0	0	2152	1	0.0000154871	64598	1	0	1	1843	1	0.003299	0	0	0.003299	0.003717468	0	0	0.003717468	36.22	36.2200012207031	36.22	100	100	100	100	100	100	PASS
ESRRB	0	0	0	0	0	0	0	0	0	0	0	1	0	0	0	0	0.00743494	0	0	0.00743494	41.87	41.8699989318848	41.87	100	100	100	100	100	100	PASS
ETFA	1	0.000465116	1	2152	5	0.0002947725	64598	19	0.657988631061068	0.480823708850821	886.158095412063	1	0.000131	0.000393	0	0.000524	0.000464684	0	0	0.000464684	38.6	38.5999984741211	38.6	100	100	100	99.63	99.629997253418	99.63	PASS
ETFB	0	0	0	2152	3	0.0000464617	64598	3	0	1	1843	1	0	0	0	0	0.000464684	0	0	0.000464684	33.29	33.2900009155273	33.29	100	100	100	100	100	100	PASS
ETFDH	0	0	0	2152	23	0.0008983203	64598	58	0	0.26630429952913	490.798824032186	1	0	0	0	0	0.00139405	0	0	0.00139405	35.12	35.1199989318848	35.12	100	100	100	100	100	100	PASS
ETHE1	0	0	0	2152	6	0.000170446	64598	11	0	1	1843	1	0.015706	0	0	0.015706	0.000464684	0	0	0.000464684	33.8	33.7999992370606	33.8	100	100	100	99.49	99.4899978637695	99.49	PASS
EVC	1	0.000929368	2	2152	15	0.0005039896	64598	33	0.882856007306214	0.312105754206181	575.210905001992	1	0.000816	0.000396	0	0.001212	0	0	0	0	39.21	39.2099990844727	39.21	100	100	100	99.08	99.0800018310547	99.08	PASS
EVC2	1	0.000464684	1	2152	17	0.0004806926	64598	31	-0.0488646233180889	1	1843	1	0.000132	0.000131	0	0.000263	0.000464684	0	0	0.000464684	35.56	35.560001373291	35.56	100	100	100	100	100	100	PASS
EXOC6B	0	0	0	0	0	0	0	0	0	0	0	1	0.002231	0.004726	0	0.006957	0.00232342	0	0.000464684	0.002788104	36.45	36.4500007629395	36.45	100	100	100	98.34	98.3399963378906	98.34	PASS
EXOC8	0	0	0	2152	1	0.0000154895	64598	1	0	1	1843	1	0	0	0	0	0	0	0	0	34.83	34.8300018310547	34.83	100	100	100	100	100	100	PASS
EXOSC2	0	0	0	2152	1	0.00010842	64598	7	0	1	1843	1	0	0	0	0	0.000929368	0	0	0.000929368	35.59	35.5900001525879	35.59	100	100	100	100	100	100	PASS
EXOSC3	1	0.000929368	2	2152	5	0.001145812	64598	74	-0.302048476255654	1	1843	1	0	0	0	0	0	0	0	0	39.39	39.3899993896484	39.39	100	100	100	100	100	100	PASS
EXOSC8	0	0	0	2152	1	0.0000154866	64598	1	0	1	1843	1	0	0	0	0	0	0	0	0	41.63	41.6300010681152	41.63	100	100	100	100	100	100	PASS
EXOSC9	0	0	0	2152	1	0.0000309703	64598	2	0	1	1843	1	0	0	0	0	0.00139405	0	0	0.00139405	34.7	34.7000007629395	34.7	100	100	100	99.06	99.0599975585938	99.06	PASS
EXPH5	0	0	0	2152	1	0.0000154895	64598	1	0	1	1843	1	0	0	0	0	0.000464684	0	0	0.000464684	36.11	36.1100006103516	36.11	100	100	100	99.56	99.5599975585938	99.56	PASS
EXT2	0	0	0	2152	2	0.0000309794	64598	2	0	1	1843	1	0.000262	0	0	0.000262	0	0	0	0	38.27	38.2700004577637	38.27	100	100	100	99.53	99.5299987792969	99.53	PASS
EXTL3	0	0	0	2152	2	0.0000309689	64598	2	0	1	1843	1	0.001444	0	0	0.001444	0	0	0	0	41.04	41.0400009155273	41.04	100	100	100	99.65	99.6500015258789	99.65	PASS
EYS	2	0.000929368	2	2152	41	0.0019049704	64598	123	-1.03544670492637	0.445569942879599	821.185404727101	1	0.016997	0.012078	0.000262	0.029337	0.008364308	0.000464684	0.00511152	0.013940512	36.15	36.1500015258789	36.15	100	100	100	99.75	99.75	99.75	PASS
F10	1	0.000464684	1	2152	0	0	64598	0	0	0.0322397003745318	59.4177677902621	0.612554307116105	0.004354	0	0	0.004354	0	0	0	0	43.69	43.689998626709	43.69	100	100	100	100	100	100	PASS
F12	0	0	0	2152	2	0.0000774123	64598	5	0	1	1843	1	0	0	0	0	0	0	0	0	41.97	41.9700012207031	41.97	100	100	100	100	100	100	PASS
F13A1	0	0	0	2152	6	0.0002171385	64598	14	0	1	1843	1	0.001346	0	0	0.001346	0	0	0	0	34.84	34.8400001525879	34.84	100	100	100	98.96	98.9599990844727	98.96	PASS
F13B	0	0	0	2152	1	0.0000155015	64598	1	0	1	1843	1	0.00027	0	0	0.00027	0.002323424	0	0	0.002323424	33.92	33.9199981689453	33.92	100	100	100	99.91	99.9100036621094	99.91	PASS
F2	0	0	0	2152	3	0.0000619449	64598	4	0	1	1843	1	0	0	0	0	0	0	0	0	36.57	36.5699996948242	36.57	100	100	100	100	100	100	PASS
F5	0	0	0	2152	7	0.000247808	64598	16	0	1	1843	1	0.000393	0.000131	0	0.000524	0.00185874	0	0	0.00185874	33.41	33.4099998474121	33.41	100	100	100	99.04	99.0400009155274	99.04	PASS
F7	3	0.006040892	13	2152	13	0.0011630364	64598	75	2.37686534397795	0.00000495405899498843	0.00913033072776367	0.000760860893980306	0	0	0	0	0	0	0	0	37.42	37.4199981689453	37.42	100	100	100	99.84	99.8399963378906	99.84	PASS
FA2H	1	0.000464684	1	2152	6	0.0002788034	64598	18	0.737001815885564	0.46352292409799	854.272749112596	1	0.000132	0	0	0.000132	0.009293684	0	0	0.009293684	37.74	37.7400016784668	37.74	100	100	100	100	100	100	PASS
FAH	2	0.001394052	3	2152	16	0.0006977168	64598	45	0.998570899500984	0.201190616014542	370.794305314801	1	0.001836	0	0	0.001836	0	0	0	0	39.22	39.2200012207031	39.22	100	100	100	100	100	100	PASS
FAM126A	0	0	0	2152	1	0.0000619425	64598	4	0	1	1843	1	0	0	0	0	0.000929368	0	0	0.000929368	36.31	36.310001373291	36.31	100	100	100	100	100	100	PASS
FAM149B1	0	0	0	0	0	0	0	0	0	0	0	1	0.001574	0	0	0.001574	0.000929368	0	0	0.000929368	36.62	36.6199989318848	36.62	100	100	100	100	100	100	PASS
FAM189A1	0	0	0	2152	2	0.0001239009	64598	8	0	1	1843	1	0	0	0	0	0	0	0	0	41.03	41.0299987792969	41.03	100	100	100	100	100	100	PASS
FAM20A	0	0	0	2152	2	0.0000464631	64598	3	0	1	1843	1	0.000262	0	0	0.000262	0	0	0	0	36.86	36.8600006103516	36.86	100	100	100	99.7	99.6999969482422	99.7	PASS
FAM20C	0	0	0	2152	2	0.0000464512	64598	3	0	1	1843	1	0.000787	0.000401	0	0.001188	0.000464684	0.001394052	0	0.001858736	41.35	41.3499984741211	41.35	100	100	100	100	100	100	PASS
FAN1	1	0.000929368	2	2152	5	0.0003871969	64598	25	1.26318256876297	0.215902758034435	397.908783057464	1	0.017051	0	0	0.017051	0	0.000464684	0	0.000464684	35.78	35.7799987792969	35.78	100	100	100	99.94	99.9400024414063	99.94	PASS
FANCA	3	0.008828998	19	2152	55	0.0115709788	64598	747	-0.390189287236536	0.302041986058484	556.663380305786	1	0.001647	0.000131	0	0.001778	0.00418216	0	0	0.00418216	41.02	41.0200004577637	41.02	100	100	100	100	100	100	PASS
FANCC	1	0.00232342	5	2152	19	0.001006732	64598	65	1.20657029317206	0.0754288572878547	139.015383981516	1	0.000262	0.000262	0	0.000524	0.000464684	0	0	0.000464684	38.06	38.060001373291	38.06	100	100	100	99.56	99.5599975585938	99.56	PASS
FANCD2	4	0.001859168	4	2152	7	0.0003871877	64598	25	2.26355211481798	0.0134524187513244	24.7928077586908	0.381427811672167	0.001059	0.000262	0	0.001321	0.000464684	0.000464684	0	0.000929368	37.01	37.0099983215332	37.01	100	100	100	99.9	99.9000015258789	99.9	PASS
FANCE	0	0	0	2152	4	0.0001703946	64598	11	0	1	1843	1	0	0	0	0	0.000464684	0	0	0.000464684	37.44	37.439998626709	37.44	100	100	100	100	100	100	PASS
FANCI	2	0.001394052	3	2152	11	0.0004026664	64598	26	1.79162737814604	0.065662621418761	121.016211274776	0.938110164920748	0.000524	0	0	0.000524	0	0	0	0	34.09	34.0900001525879	34.09	100	100	100	100	100	100	PASS
FANCL	0	0	0	2152	3	0.0001084493	64598	7	0	1	1843	1	0.000262	0	0	0.000262	0	0	0	0	36.87	36.8699989318848	36.87	100	100	100	98.43	98.4300003051758	98.43	PASS
FANCM	2	0.000929368	2	2152	13	0.0013474932	64598	87	-0.535956116629631	1	1843	1	0.007619	0.000393	0	0.008012	0.00743494	0	0	0.00743494	38.46	38.4599990844727	38.46	100	100	100	100	100	100	PASS
FAR1	0	0	0	0	0	0	0	0	0	0	0	1	0	0	0	0	0.000929368	0	0	0.000929368	37.53	37.5299987792969	37.53	100	100	100	100	100	100	PASS
FARS2	0	0	0	2152	7	0.0003406914	64598	22	0	1	1843	1	0.011545	0.001049	0	0.012594	0.008364312	0	0	0.008364312	38.29	38.2900009155273	38.29	100	100	100	100	100	100	PASS
FARSA	0	0	0	2152	1	0.0000154967	64598	1	0	1	1843	1	0.006165	0	0.000394	0.006559	0.00836431	0	0	0.00836431	35.07	35.0699996948242	35.07	100	100	100	100	100	100	PASS
FARSB	0	0	0	2152	4	0.0001084157	64598	7	0	1	1843	1	0.000393	0.005263	0	0.005656	0.000464684	0	0	0.000464684	37.09	37.0900001525879	37.09	100	100	100	100	100	100	PASS
FASTKD2	0	0	0	2152	3	0.0000619473	64598	4	0	1	1843	1	0	0	0	0	0	0	0	0	36.25	36.25	36.25	100	100	100	98.76	98.7600021362305	98.76	PASS
FAT4	0	0	0	0	0	0	0	0	0	0	0	1	0.001049	0	0	0.001049	0.001858734	0	0	0.001858734	36.85	36.8499984741211	36.85	100	100	100	99.79	99.7900009155273	99.79	PASS
FBLN5	0	0	0	2152	2	0.0000929205	64598	6	0	1	1843	1	0.000131	0	0	0.000131	0.00743494	0	0	0.00743494	35.98	35.9799995422363	35.98	100	100	100	100	100	100	PASS
FBP1	0	0	0	2152	4	0.0001550249	64598	10	0	1	1843	1	0.008404	0	0	0.008404	0.000929368	0	0	0.000929368	41.38	41.3800010681152	41.38	100	100	100	100	100	100	PASS
FBXL4	0	0	0	2152	8	0.0004491605	64598	29	0	1	1843	1	0.000131	0	0	0.000131	0	0	0	0	34.2	34.2000007629395	34.2	100	100	100	99.83	99.8300018310547	99.83	PASS
FBXO31	0	0	0	0	0	0	0	0	0	0	0	1	0	0	0	0	0.008829	0	0	0.008829	42.42	42.4199981689453	42.42	100	100	100	99.73	99.7300033569336	99.73	PASS
FBXO7	0	0	0	2152	1	0.000108409	64598	7	0	1	1843	1	0.000262	0	0	0.000262	0	0	0	0	36.25	36.25	36.25	100	100	100	99.35	99.3499984741211	99.35	PASS
FCGR2A	0	0	0	0	0	0	0	0	0	0	0	1	0.007421	0	0	0.007421	0.00185874	0	0	0.00185874	39.91	39.9099998474121	39.91	100	100	100	100	100	100	PASS
FCGR3A	1	0.000929368	2	2152	2	0.0001393772	64598	9	2.73725539338797	0.0471029396398259	86.8107177561991	0.789188343238173	0	0	0	0	0.00185874	0	0	0.00185874	35.92	35.9199981689453	35.92	100	100	100	99.33	99.3300018310547	99.33	PASS
FCHO1	0	0	0	2152	1	0.0000154837	64598	1	0	1	1843	1	0.000656	0.000131	0	0.000787	0.00836431	0	0	0.00836431	37.42	37.4199981689453	37.42	100	100	100	99.41	99.4100036621094	99.41	PASS
FCN3	0	0	0	2152	2	0.0000619607	64598	4	0	1	1843	1	0	0	0	0	0	0	0	0	36.4	36.4000015258789	36.4	100	100	100	97.26	97.2600021362305	97.26	PASS
FCSK	0	0	0	2152	2	0.0002478081	64598	16	0	1	1843	1	0.000262	0	0	0.000262	0.008829	0	0	0.008829	40.86	40.8600006103516	40.86	100	100	100	100	100	100	PASS
FDFT1	0	0	0	0	0	0	0	0	0	0	0	1	0.000657	0	0	0.000657	0	0	0	0	40.87	40.8699989318848	40.87	100	100	100	100	100	100	PASS
FDX2	0	0	0	2152	1	0.0000154832	64598	1	0	1	1843	1	0.000131	0	0	0.000131	0.00836431	0	0	0.00836431	47.47	47.4700012207031	47.47	100	100	100	100	100	100	PASS
FDXR	0	0	0	2152	4	0.000123922	64598	8	0	1	1843	1	0	0	0	0	0	0	0	0	43.38	43.3800010681152	43.38	100	100	100	100	100	100	PASS
FECH	1	0.000464684	1	2152	6	0.0003871101	64598	25	0.263506021682992	0.573526163447534	1057.00871923381	1	0	0.000262	0	0.000262	0	0	0	0	36.61	36.6100006103516	36.61	100	100	100	99.59	99.5899963378906	99.59	PASS
FERMT1	0	0	0	2152	4	0.0001703582	64598	11	0	1	1843	1	0	0	0	0	0	0	0	0	37.75	37.75	37.75	100	100	100	100	100	100	PASS
FERMT3	0	0	0	2152	1	0.0000154823	64598	1	0	1	1843	1	0	0	0	0	0	0	0	0	43.91	43.9099998474121	43.91	100	100	100	100	100	100	PASS
FGA	0	0	0	2152	8	0.0002478375	64598	16	0	1	1843	1	0	0	0	0	0.00139405	0	0	0.00139405	39.71	39.7099990844727	39.71	100	100	100	100	100	100	PASS
FGB	0	0	0	2152	1	0.000108416	64598	7	0	1	1843	1	0	0	0	0	0.00139405	0	0	0.00139405	32.05	32.0499992370605	32.05	100	100	100	99.31	99.3099975585938	99.31	PASS
FGD4	0	0	0	2152	3	0.0000774329	64598	5	0	1	1843	1	0.000927	0.000393	0	0.00132	0.007434944	0.000929368	0	0.008364312	37.47	37.4700012207031	37.47	100	100	100	100	100	100	PASS
FGF20	0	0	0	0	0	0	0	0	0	0	0	1	0.000135	0	0	0.000135	0	0	0	0	36.67	36.6699981689453	36.67	100	100	100	100	100	100	PASS
FGF23	0	0	0	2152	2	0.0000309798	64598	2	0	1	1843	1	0	0	0	0	0.00139405	0	0	0.00139405	38.38	38.3800010681152	38.38	100	100	100	100	100	100	PASS
FGF3	0	0	0	2152	2	0.0000309742	64598	2	0	1	1843	1	0.000569	0	0	0.000569	0	0	0	0	44.68	44.6800003051758	44.68	100	100	100	100	100	100	PASS
FGF5	0	0	0	2152	1	0.0000154847	64598	1	0	1	1843	1	0.000393	0.000131	0	0.000524	0.007899624	0	0	0.007899624	37.48	37.4799995422363	37.48	100	100	100	99.81	99.8099975585938	99.81	PASS
FGG	0	0	0	2152	1	0.0000154904	64598	1	0	1	1843	1	0	0	0	0	0.00139405	0	0	0.00139405	33.37	33.3699989318848	33.37	100	100	100	100	100	100	PASS
FH	0	0	0	2152	5	0.0001858233	64598	12	0	1	1843	1	0.000393	0	0	0.000393	0.000464684	0	0	0.000464684	32.58	32.5800018310547	32.58	100	100	100	99.73	99.7300033569336	99.73	PASS
FIBP	0	0	0	0	0	0	0	0	0	0	0	1	0.00105	0	0	0.00105	0	0	0	0	34.83	34.8300018310547	34.83	100	100	100	96.36	96.3600006103516	96.36	PASS
FIG4	2	0.000929368	2	2152	14	0.0004028245	64598	26	1.20609853933492	0.227875157423976	419.973915132388	1	0.001443	0	0	0.001443	0	0	0	0	36.46	36.4599990844727	36.46	100	100	100	100	100	100	PASS
FITM2	0	0	0	2152	2	0.0000464948	64598	3	0	1	1843	1	0.000131	0	0	0.000131	0.000464684	0	0	0.000464684	33.43	33.4300003051758	33.43	100	100	100	96.18	96.1800003051758	96.18	PASS
FKBP10	1	0.000464684	1	2152	3	0.0001085757	64598	7	2.09754871678428	0.230628052185011	425.047500176976	1	0	0	0	0	0	0	0	0	37.17	37.1699981689453	37.17	100	100	100	100	100	100	PASS
FKBP14	1	0.00418216	9	2152	1	0.000867437	64598	56	2.26941737032905	0.00023239566901204	0.42830521798919	0.0164732776149688	0	0	0	0	0	0	0	0	36.4	36.4000015258789	36.4	100	100	100	98.78	98.7799987792969	98.78	PASS
FKRP	1	0.00185874	4	2152	11	0.0022062006	64598	143	-0.247238994115794	1	1843	1	0	0	0	0	0.000464684	0	0	0.000464684	47.31	47.310001373291	47.31	100	100	100	100	100	100	PASS
FKTN	0	0	0	2152	8	0.0001394441	64598	9	0	1	1843	1	0.000419	0.000262	0	0.000681	0.000464684	0	0	0.000464684	35.22	35.2200012207031	35.22	100	100	100	99.64	99.6399993896484	99.64	PASS
FLAD1	0	0	0	2152	3	0.0000929297	64598	6	0	1	1843	1	0	0	0	0	0	0	0	0	36.65	36.6500015258789	36.65	100	100	100	99.73	99.7300033569336	99.73	PASS
FLG-AS1	0	0	0	2152	4	0.0038725211	64598	250	0	0.000474040246129853	0.87365617361732	0.0301260749523214	0	0	0	0	0	0	0	0	35.43	35.4300003051758	35.43	100	100	100	99.78	99.7799987792969	99.78	PASS
FLG2	0	0	0	0	0	0	0	0	0	0	0	1	0	0	0	0	0.000929368	0	0	0.000929368	33.94	33.939998626709	33.94	100	100	100	99.55	99.5500030517578	99.55	PASS
FLNB	0	0	0	2152	3	0.0000774334	64598	5	0	1	1843	1	0.001574	0.002638	0	0.004212	0.009293674	0	0	0.009293674	38.78	38.7799987792969	38.78	100	100	100	99.99	99.9899978637695	99.99	PASS
FLVCR1	0	0	0	2152	5	0.0001548763	64598	10	0	1	1843	1	0	0	0	0	0	0	0	0	35.95	35.9500007629395	35.95	100	100	100	99.46	99.4599990844727	99.46	PASS
FLVCR2	0	0	0	2152	4	0.0000774244	64598	5	0	1	1843	1	0.002626	0	0	0.002626	0.00743494	0	0	0.00743494	37.2	37.2000007629395	37.2	100	100	100	100	100	100	PASS
FMN2	0	0	0	2152	1	0.0000154851	64598	1	0	1	1843	1	0.00459	0.000131	0	0.004721	0.002323418	0	0	0.002323418	36.06	36.060001373291	36.06	98.93	98.9300003051758	98.93	90.92	90.9199981689453	90.92	PASS
FMO3	2	0.002325154	5	2152	11	0.0033609986	64598	217	-0.531563669490258	0.565895716560427	1042.94580562087	1	0	0	0	0	0.002323424	0	0	0.002323424	38.17	38.1699981689453	38.17	100	100	100	100	100	100	PASS
FOLR1	0	0	0	2152	3	0.0000464665	64598	3	0	1	1843	1	0	0	0	0	0	0	0	0	34.6	34.5999984741211	34.6	100	100	100	100	100	100	PASS
FOXE1	0	0	0	0	0	0	0	0	0	0	0	1	0	0	0	0	0.000464684	0	0	0.000464684	40.94	40.939998626709	40.94	100	100	100	99.1	99.0999984741211	99.1	PASS
FOXE3	0	0	0	2152	3	0.0001096865	64598	7	0	1	1843	1	0.000134	0	0	0.000134	0	0	0	0	38.33	38.3300018310547	38.33	100	100	100	100	100	100	PASS
FOXI1	0	0	0	2152	1	0.000123958	64598	8	0	1	1843	1	0	0	0	0	0.000464684	0	0	0.000464684	40.62	40.6199989318848	40.62	100	100	100	100	100	100	PASS
FOXRED1	0	0	0	2152	7	0.0004339687	64598	28	0	1	1843	1	0	0	0	0	0	0	0	0	39.51	39.5099983215332	39.51	100	100	100	98.21	98.2099990844727	98.21	PASS
FRAS1	1	0.00139405	3	2152	16	0.0004336632	64598	28	1.68463537827291	0.0770984661922646	142.092473192344	1	0.006716	0.007542	0	0.014258	0.012546464	0	0	0.012546464	35.29	35.2900009155273	35.29	100	100	100	99.83	99.8300018310547	99.83	PASS
FREM1	1	0.000464684	1	2152	4	0.0004335614	64598	28	0.100013651652002	0.6134744244413	1130.63336424532	1	0.000262	0	0	0.000262	0	0	0	0	36.68	36.6800003051758	36.68	100	100	100	99.56	99.5599975585938	99.56	PASS
FREM2	0	0	0	2152	3	0.0001238942	64598	8	0	1	1843	1	0.001705	0.000393	0	0.002098	0.001394052	0	0	0.001394052	38.19	38.189998626709	38.19	100	100	100	99.83	99.8300018310547	99.83	PASS
FRMD4A	0	0	0	0	0	0	0	0	0	0	0	1	0.002629	0.00118	0	0.003809	0.000464684	0	0	0.000464684	39.48	39.4799995422363	39.48	100	100	100	100	100	100	PASS
FRRS1L	0	0	0	2152	3	0.0000933701	64598	6	0	1	1843	1	0.000262	0	0	0.000262	0.000464684	0	0	0.000464684	35.68	35.6800003051758	35.68	100	100	100	97.88	97.879997253418	97.88	PASS
FSHB	0	0	0	2152	3	0.0000464559	64598	3	0	1	1843	1	0.001469	0	0	0.001469	0	0	0	0	34.04	34.0400009155273	34.04	100	100	100	100	100	100	PASS
FSHR	0	0	0	2152	1	0.0000154856	64598	1	0	1	1843	1	0.017058	0	0	0.017058	0.000464684	0	0	0.000464684	35.19	35.189998626709	35.19	100	100	100	100	100	100	PASS
FSIP2	0	0	0	2152	1	0.0000155754	64598	1	0	1	1843	1	0.002754	0.000131	0	0.002885	0.00325279	0	0	0.00325279	35.48	35.4799995422363	35.48	100	100	100	99.59	99.5899963378906	99.59	PASS
FTCD	1	0.000929368	2	2152	5	0.0001703769	64598	11	2.447520225137	0.0640366128112455	118.019477411125	0.929287223709649	0	0	0	0	0	0	0	0	43.07	43.0699996948242	43.07	100	100	100	99.15	99.1500015258789	99.15	PASS
FTL	0	0	0	2152	4	0.000092934	64598	6	0	1	1843	1	0	0	0	0	0	0	0	0	37.64	37.6399993896484	37.64	100	100	100	100	100	100	PASS
FTO	0	0	0	2152	2	0.0000464689	64598	3	0	1	1843	1	0.003803	0	0	0.003803	0.009293684	0	0	0.009293684	36.82	36.8199996948242	36.82	100	100	100	100	100	100	PASS
FUCA1	0	0	0	2152	5	0.0002014094	64598	13	0	1	1843	1	0.000131	0.000133	0	0.000264	0	0	0	0	37.87	37.8699989318848	37.87	100	100	100	100	100	100	PASS
FUT1	0	0	0	2152	2	0.0001548513	64598	10	0	1	1843	1	0	0	0	0	0.000464684	0	0	0.000464684	41.05	41.0499992370606	41.05	100	100	100	100	100	100	PASS
FUT2	0	0	0	2152	1	0.0000309943	64598	2	0	1	1843	1	0.000131	0	0	0.000131	0.000464684	0	0	0.000464684	36.56	36.560001373291	36.56	100	100	100	100	100	100	PASS
FUT8	0	0	0	0	0	0	0	0	0	0	0	1	0.000524	0.000131	0	0.000655	0.013015468	0	0	0.013015468	36.43	36.4300003051758	36.43	100	100	100	99.89	99.8899993896485	99.89	PASS
FXN	0	0	0	2152	3	0.0000929392	64598	6	0	1	1843	1	0	0	0	0	0	0	0	0	34.73	34.7299995422363	34.73	100	100	100	99.39	99.3899993896484	99.39	PASS
FXR1	0	0	0	0	0	0	0	0	0	0	0	1	0.009575	0	0	0.009575	0.004646844	0	0	0.004646844	37.48	37.4799995422363	37.48	100	100	100	100	100	100	PASS
FYB1	0	0	0	0	0	0	0	0	0	0	0	1	0.000131	0.005905	0	0.006036	0.010687732	0	0	0.010687732	38.95	38.9500007629395	38.95	100	100	100	99.86	99.8600006103516	99.86	PASS
FYCO1	1	0.000464684	1	2152	3	0.0002787613	64598	18	0.737219682839253	0.46352292409799	854.272749112596	1	0	0	0	0	0.008364308	0	0	0.008364308	38.21	38.2099990844727	38.21	100	100	100	99.93	99.9300003051758	99.93	PASS
FZD6	0	0	0	2152	4	0.0001549306	64598	10	0	1	1843	1	0.000131	0	0	0.000131	0.0027881	0	0	0.0027881	37.17	37.1699981689453	37.17	100	100	100	100	100	100	PASS
G6PC1	0	0	0	2152	19	0.001657438	64598	107	0	0	0	NA	0	0	0	0	0	0	0	0	0	0	0	0	0	0	0	0	0	LOW_DP
G6PC3	0	0	0	2152	2	0.0000619521	64598	4	0	1	1843	1	0	0	0	0	0	0	0	0	36.85	36.8499984741211	36.85	100	100	100	100	100	100	PASS
GAA	3	0.002788108	6	2152	44	0.008541189	64598	552	-1.61515047176122	0.00161501208706496	2.97646727646071	0.0763196737554029	0	0	0	0	0	0	0	0	44.03	44.0299987792969	44.03	100	100	100	100	100	100	PASS
GAB1	0	0	0	0	0	0	0	0	0	0	0	1	0.000527	0.000393	0	0.00092	0.00139405	0	0	0.00139405	37.19	37.189998626709	37.19	100	100	100	100	100	100	PASS
GAD1	0	0	0	2152	1	0.000015488	64598	1	0	1	1843	1	0	0	0	0	0.00325279	0	0	0.00325279	36.43	36.4300003051758	36.43	100	100	100	100	100	100	PASS
GALC	3	0.001394484	3	2152	23	0.000837802	64598	54	0.735050147977225	0.433032973434792	798.079770040321	1	0.000263	0	0	0.000263	0.00975836	0	0	0.00975836	36.55	36.5499992370606	36.55	100	100	100	100	100	100	PASS
GALE	0	0	0	2152	4	0.0001394081	64598	9	0	1	1843	1	0	0	0	0	0	0	0	0	37.6	37.5999984741211	37.6	100	100	100	100	100	100	PASS
GALK1	1	0.000464684	1	2152	2	0.0001858789	64598	12	1.32188695846613	0.34692280498506	639.378729587465	1	0	0	0	0	0	0	0	0	42.43	42.4300003051758	42.43	100	100	100	100	100	100	PASS
GALM	0	0	0	0	0	0	0	0	0	0	0	1	0.00092	0	0	0.00092	0.001858734	0	0	0.001858734	34.43	34.4300003051758	34.43	100	100	100	98.55	98.5500030517578	98.55	PASS
GALNS	0	0	0	2152	23	0.00091423	64598	59	0	0.266981756208506	492.047376692276	1	0.000131	0	0	0.000131	0.000466853	0	0	0.000466853	41.78	41.7799987792969	41.78	100	100	100	100	100	100	PASS
GALNT2	0	0	0	0	0	0	0	0	0	0	0	1	0.000393	0	0	0.000393	0.000464684	0	0	0.000464684	39.66	39.6599998474121	39.66	100	100	100	100	100	100	PASS
GALNT3	0	0	0	2152	6	0.0001548941	64598	10	0	1	1843	1	0	0	0	0	0.00325279	0	0	0.00325279	40.54	40.5400009155273	40.54	100	100	100	100	100	100	PASS
GALT	2	0.001394052	3	2152	24	0.0010221467	64598	66	0.447682107807457	0.488960657837111	901.154492393796	1	0.001575	0	0	0.001575	0	0	0	0	36.29	36.2900009155273	36.29	100	100	100	100	100	100	PASS
GAMT	1	0.000464684	1	2152	10	0.000774621	64598	50	-0.737240642578386	1	1843	1	0	0	0	0	0.000464684	0	0	0.000464684	42.32	42.3199996948242	42.32	100	100	100	100	100	100	PASS
GAN	1	0.000464684	1	2152	3	0.0000464919	64598	3	3.32119867955236	0.122857997716503	226.427289791516	1	0.000131	0.000131	0	0.000262	0.008829	0	0	0.008829	36.51	36.5099983215332	36.51	100	100	100	100	100	100	PASS
GAS2L2	0	0	0	2152	1	0.00100682	64598	65	0	0.276300543330127	509.221901357424	1	0	0	0	0	0	0	0	0	38.3	38.2999992370605	38.3	100	100	100	100	100	100	PASS
GAS8	0	0	0	2152	2	0.0000464468	64598	3	0	1	1843	1	0.000131	0	0	0.000131	0	0	0	0	42.58	42.5800018310547	42.58	100	100	100	99.87	99.870002746582	99.87	PASS
GATAD1	0	0	0	0	0	0	0	0	0	0	0	1	0	0	0	0	0.00464684	0	0	0.00464684	39.17	39.1699981689453	39.17	100	100	100	99.83	99.8300018310547	99.83	PASS
GATB	0	0	0	2152	1	0.000015489	64598	1	0	1	1843	1	0.000131	0.003673	0	0.003804	0.00139405	0	0	0.00139405	35.34	35.3400001525879	35.34	100	100	100	100	100	100	PASS
GATC	0	0	0	0	0	0	0	0	0	0	0	1	0	0	0	0	0.000464684	0	0	0.000464684	36.28	36.2799987792969	36.28	100	100	100	98.78	98.7799987792969	98.78	PASS
GATM	0	0	0	2152	2	0.0000464674	64598	3	0	1	1843	1	0.000815	0	0	0.000815	0	0	0	0	37.65	37.6500015258789	37.65	100	100	100	100	100	100	PASS
GBA	4	0.010687728	23	2152	18	0.0142898896	64598	923	-0.419039573422687	0	0	NA	0	0	0	0	0	0	0	0	2021-09-28	28.0900001525879	2021-09-28	85.93	85.9300003051758	85.93	73.15	73.1500015258789	73.15	LOW_DP
GBA2	0	0	0	2152	5	0.0001084286	64598	7	0	1	1843	1	0	0	0	0	0.000464684	0	0	0.000464684	35.72	35.7200012207031	35.72	100	100	100	100	100	100	PASS
GBE1	3	0.002323418	5	2152	15	0.0018450783	64598	119	0.33256668739758	0.604065399308977	1113.29253092645	1	0.000656	0	0	0.000656	0.007899624	0	0	0.007899624	36.52	36.5200004577637	36.52	100	100	100	98.97	98.9700012207031	98.97	PASS
GCDH	4	0.001858736	4	2152	40	0.0024368682	64598	157	-0.39070634789658	0.822191504778514	1515.2989433068	1	0.000131	0	0	0.000131	0.00836431	0	0	0.00836431	39.11	39.1100006103516	39.11	100	100	100	100	100	100	PASS
GCH1	0	0	0	2152	4	0.0000774579	64598	5	0	1	1843	1	0.000131	0.002305	0	0.002436	0.00743494	0	0	0.00743494	36.67	36.6699981689453	36.67	100	100	100	100	100	100	PASS
GCK	0	0	0	2152	8	0.0001393739	64598	9	0	1	1843	1	0	0	0	0	0.00464684	0	0	0.00464684	44.25	44.25	44.25	100	100	100	100	100	100	PASS
GCLC	0	0	0	0	0	0	0	0	0	0	0	1	0.000262	0	0	0.000262	0.000464684	0	0	0.000464684	36.49	36.4900016784668	36.49	100	100	100	100	100	100	PASS
GCNT2	0	0	0	2152	5	0.0002787894	64598	18	0	1	1843	1	0.001967	0.009534	0	0.011501	0.004182154	0	0	0.004182154	38.35	38.3499984741211	38.35	100	100	100	100	100	100	PASS
GCSH	0	0	0	0	0	0	0	0	0	0	0	1	0	0	0	0	0.008829	0	0	0.008829	39.18	39.1800003051758	39.18	100	100	100	100	100	100	PASS
GDAP1	3	0.001394052	3	2152	10	0.000309764	64598	20	2.17004298409989	0.0366391902583803	67.5260276461949	0.662019878884264	0.007484	0.000131	0	0.007615	0.003252784	0	0	0.003252784	37.77	37.7700004577637	37.77	100	100	100	100	100	100	PASS
GDAP2	0	0	0	2152	2	0.0000464669	64598	3	0	1	1843	1	0	0	0	0	0.000464684	0	0	0.000464684	35.76	35.7599983215332	35.76	100	100	100	99.85	99.8499984741211	99.85	PASS
GDF1	1	0.000464684	1	2152	7	0.0005031832	64598	33	-0.11483378429743	1	1843	1	0	0	0	0	0.00836431	0	0	0.00836431	38.99	38.9900016784668	38.99	100	100	100	98.52	98.5199966430664	98.52	PASS
GDF5	0	0	0	2152	3	0.0000464655	64598	3	0	1	1843	1	0	0	0	0	0	0	0	0	37.49	37.4900016784668	37.49	100	100	100	100	100	100	PASS
GDF6	1	0.000464684	1	2152	3	0.0001703485	64598	11	1.4477607269561	0.325162328663997	599.274171727747	1	0	0	0	0	0.003717468	0	0	0.003717468	34.73	34.7299995422363	34.73	100	100	100	99.32	99.3199996948242	99.32	PASS
GDF9	0	0	0	0	0	0	0	0	0	0	0	1	0	0	0	0	0.00697026	0	0	0.00697026	35.47	35.4700012207031	35.47	100	100	100	99.77	99.7699966430664	99.77	PASS
GEMIN4	0	0	0	2152	1	0.0000309809	64598	2	0	1	1843	1	0	0	0	0	0	0	0	0	36.29	36.2900009155273	36.29	100	100	100	100	100	100	PASS
GFER	1	0.000464684	1	2152	6	0.0003562002	64598	23	0.38356164433953	0.54462685666164	1003.7472968274	1	0	0	0	0	0	0	0	0	40.12	40.1199989318848	40.12	100	100	100	100	100	100	PASS
GFM1	0	0	0	2152	20	0.0006195527	64598	40	0	0.640674187756305	1180.76252803487	1	0	0	0	0	0.007434944	0	0	0.007434944	38.66	38.6599998474121	38.66	100	100	100	100	100	100	PASS
GFM2	0	0	0	2152	1	0.0000619521	64598	4	0	1	1843	1	0.000918	0	0	0.000918	0.00929368	0	0	0.00929368	38.37	38.3699989318848	38.37	100	100	100	100	100	100	PASS
GFPT1	0	0	0	2152	2	0.0000774416	64598	5	0	1	1843	1	0	0	0	0	0.000929368	0	0	0.000929368	35.44	35.439998626709	35.44	100	100	100	100	100	100	PASS
GGA3	0	0	0	2152	1	0.000108416	64598	7	0	1	1843	1	0	0	0	0	0	0	0	0	37.5	37.5	37.5	100	100	100	100	100	100	PASS
GGCX	0	0	0	2152	4	0.0001858407	64598	12	0	1	1843	1	0	0	0	0	0.001858736	0	0	0.001858736	35.26	35.2599983215332	35.26	100	100	100	99.91	99.9100036621094	99.91	PASS
GH1	0	0	0	2152	1	0.000015488	64598	1	0	1	1843	1	0	0	0	0	0	0	0	0	41.86	41.8600006103516	41.86	100	100	100	100	100	100	PASS
GHR	0	0	0	2152	6	0.0002013578	64598	13	0	1	1843	1	0.00118	0.000131	0	0.001311	0.01115242	0	0.0027881	0.01394052	34.37	34.3699989318848	34.37	100	100	100	98.12	98.120002746582	98.12	PASS
GHRHR	0	0	0	2152	5	0.000402704	64598	26	0	1	1843	1	0	0	0	0	0	0	0	0	38.25	38.25	38.25	100	100	100	100	100	100	PASS
GIGYF2	0	0	0	2152	1	0.0000154871	64598	1	0	1	1843	1	0	0	0	0	0	0	0	0	33.81	33.810001373291	33.81	100	100	100	99.55	99.5500030517578	99.55	PASS
GINS1	1	0.000464684	1	2152	2	0.0005730906	64598	37	-0.302513262114271	1	1843	1	0	0	0	0	0.000464684	0	0	0.000464684	40.03	40.0299987792969	40.03	100	100	100	100	100	100	PASS
GIPC3	0	0	0	2152	1	0.0000158755	64598	1	0	1	1843	1	0	0	0	0	0.00836431	0	0	0.00836431	37.56	37.560001373291	37.56	100	100	100	100	100	100	PASS
GJA1	0	0	0	2152	1	0.0000309914	64598	2	0	1	1843	1	0	0	0	0	0.000464684	0	0	0.000464684	33.14	33.1399993896484	33.14	100	100	100	94.98	94.9800033569336	94.98	PASS
GJB6	0	0	0	2152	3	0.0000774406	64598	5	0	1	1843	1	0	0	0	0	0.000929368	0	0	0.000929368	37.82	37.8199996948242	37.82	100	100	100	100	100	100	PASS
GJC2	0	0	0	2152	7	0.0001086952	64598	7	0	1	1843	1	0	0	0	0	0	0	0	0	43.28	43.2799987792969	43.28	100	100	100	99.75	99.75	99.75	PASS
GLB1	1	0.00139405	3	2152	30	0.0012544675	64598	81	0.152207212128596	0.753270502052193	1388.27753528219	1	0.000413	0	0	0.000413	0.003252784	0	0	0.003252784	37.08	37.0800018310547	37.08	100	100	100	100	100	100	PASS
GLDC	0	0	0	2152	26	0.0008229821	64598	53	0	0.419693896167895	773.49585063743	1	0.000658	0.000131	0	0.000789	0.000929368	0	0	0.000929368	37.02	37.0200004577637	37.02	100	100	100	99	99	99	PASS
GLDN	1	0.000464684	1	2152	7	0.0002942472	64598	19	0.659221283907245	0.480823708850821	886.158095412063	1	0.000131	0.000262	0	0.000393	0	0	0	0	37.09	37.0900001525879	37.09	100	100	100	100	100	100	PASS
GLE1	1	0.000464684	1	2152	9	0.00038634	64598	25	0.266378915016712	0.573526163447534	1057.00871923381	1	0	0	0	0	0.000929368	0	0	0.000929368	35.93	35.9300003051758	35.93	100	100	100	100	100	100	PASS
GLI1	0	0	0	2152	1	0.0000154885	64598	1	0	1	1843	1	0	0	0	0	0.00557621	0	0	0.00557621	39.72	39.7200012207031	39.72	100	100	100	100	100	100	PASS
GLIS3	0	0	0	2152	1	0.0000154847	64598	1	0	1	1843	1	0.001844	0.002755	0	0.004599	0	0.000464684	0	0.000464684	38.07	38.0699996948242	38.07	100	100	100	100	100	100	PASS
GLRB	0	0	0	2152	1	0.000031002	64598	2	0	1	1843	1	0.000655	0	0	0.000655	0.00139405	0.000929368	0	0.002323418	37.26	37.2599983215332	37.26	100	100	100	100	100	100	PASS
GLRX5	0	0	0	2152	1	0.0000310511	64598	2	0	1	1843	1	0.000131	0	0	0.000131	0	0	0	0	35.33	35.3300018310547	35.33	100	100	100	100	100	100	PASS
GLS	0	0	0	0	0	0	0	0	0	0	0	1	0	0	0	0	0.003717474	0	0	0.003717474	36.19	36.189998626709	36.19	100	100	100	99.98	99.9800033569336	99.98	PASS
GLUL	0	0	0	0	0	0	0	0	0	0	0	1	0	0	0	0	0.00185874	0	0	0.00185874	38.1	38.0999984741211	38.1	100	100	100	100	100	100	PASS
GLYCTK	0	0	0	2152	1	0.0000619694	64598	4	0	1	1843	1	0	0	0	0	0.007899624	0	0	0.007899624	41.57	41.5699996948242	41.57	100	100	100	100	100	100	PASS
GM2A	0	0	0	2152	1	0.0000154943	64598	1	0	1	1843	1	0	0	0	0	0.007434944	0	0	0.007434944	35.75	35.75	35.75	100	100	100	100	100	100	PASS
GMPPA	0	0	0	2152	1	0.000015488	64598	1	0	1	1843	1	0	0	0	0	0	0	0	0	38.82	38.8199996948242	38.82	100	100	100	100	100	100	PASS
GMPPB	0	0	0	2152	11	0.0013161256	64598	85	0	0.118425318360336	218.257861738099	1	0	0	0	0	0.007899624	0	0	0.007899624	47	47	47	100	100	100	100	100	100	PASS
GNAT1	0	0	0	2152	3	0.000092921	64598	6	0	1	1843	1	0	0	0	0	0.007899624	0	0	0.007899624	34.97	34.9700012207031	34.97	100	100	100	98.5	98.5	98.5	PASS
GNB3	0	0	0	0	0	0	0	0	0	0	0	1	0	0	0	0	0.00139405	0	0	0.00139405	37.38	37.3800010681152	37.38	100	100	100	99.19	99.1900024414063	99.19	PASS
GNB5	0	0	0	0	0	0	0	0	0	0	0	1	0.000655	0.000262	0	0.000917	0	0	0	0	39.11	39.1100006103516	39.11	100	100	100	100	100	100	PASS
GNE	1	0.000464684	1	2152	11	0.000433671	64598	28	0.0996489988154073	0.6134744244413	1130.63336424532	1	0.000399	0	0	0.000399	0.000929368	0	0	0.000929368	39.95	39.9500007629395	39.95	100	100	100	99.92	99.9199981689453	99.92	PASS
GNMT	0	0	0	0	0	0	0	0	0	0	0	1	0	0	0	0	0.000929368	0	0	0.000929368	39.53	39.5299987792969	39.53	100	100	100	99.16	99.1600036621094	99.16	PASS
GNPAT	0	0	0	2152	1	0.0000154885	64598	1	0	1	1843	1	0.000525	0	0	0.000525	0	0	0	0	36.93	36.9300003051758	36.93	100	100	100	100	100	100	PASS
GNPTAB	3	0.001394052	3	2152	20	0.0011309375	64598	73	0.301765174062563	0.737803762439112	1359.77233417528	1	0	0.000131	0	0.000131	0.00557621	0	0	0.00557621	37.94	37.939998626709	37.94	100	100	100	100	100	100	PASS
GNPTG	0	0	0	2152	7	0.0002788658	64598	18	0	1	1843	1	0	0	0	0	0	0	0	0	40.19	40.189998626709	40.19	100	100	100	99.68	99.6800003051758	99.68	PASS
GNRHR	2	0.00418215	9	2152	8	0.0058397254	64598	377	-0.481655723605555	0.386078818095413	711.543261749845	1	0	0	0	0	0.001858734	0	0	0.001858734	38.08	38.0800018310547	38.08	100	100	100	99.18	99.1800003051758	99.18	PASS
GNS	0	0	0	2152	2	0.0000774425	64598	5	0	1	1843	1	0	0	0	0	0.00557621	0	0	0.00557621	36.23	36.2299995422363	36.23	100	100	100	99.57	99.5699996948242	99.57	PASS
GORAB	0	0	0	2152	2	0.0000619554	64598	4	0	1	1843	1	0.000262	0	0	0.000262	0.00185874	0	0	0.00185874	35.96	35.9599990844727	35.96	100	100	100	100	100	100	PASS
GOSR2	0	0	0	2152	4	0.0007434328	64598	48	0	0.408495670180356	752.857520142396	1	0.001055	0	0	0.001055	0.00418216	0	0	0.00418216	37.96	37.9599990844727	37.96	100	100	100	100	100	100	PASS
GOT2	0	0	0	0	0	0	0	0	0	0	0	1	0	0	0	0	0.008829	0	0	0.008829	38.15	38.1500015258789	38.15	100	100	100	100	100	100	PASS
GP1BA	0	0	0	2152	4	0.0001238994	64598	8	0	1	1843	1	0	0	0	0	0	0	0	0	37.69	37.689998626709	37.69	100	100	100	98.45	98.4499969482422	98.45	PASS
GP1BB	0	0	0	2152	4	0.0001086474	64598	7	0	1	1843	1	0	0	0	0	0.000464684	0	0	0.000464684	51.37	51.3699989318848	51.37	100	100	100	100	100	100	PASS
GP6	1	0.00836431	18	2152	4	0.0019975296	64598	129	2.06602965081235	0.00000138448951880749	0.0025516141831622	0.00025516141831622	0	0	0	0	0.00139405	0	0	0.00139405	36.98	36.9799995422363	36.98	100	100	100	100	100	100	PASS
GP9	1	0.000930233	2	2152	4	0.0012240154	64598	79	-0.395957684006384	1	1843	1	0.000141	0	0	0.000141	0.012081784	0	0	0.012081784	39.87	39.8699989318848	39.87	100	100	100	100	100	100	PASS
GPAA1	0	0	0	2152	3	0.0002323414	64598	15	0	1	1843	1	0.000131	0	0	0.000131	0	0	0	0	45.13	45.1300010681152	45.13	100	100	100	100	100	100	PASS
GPC6	0	0	0	0	0	0	0	0	0	0	0	1	0.015898	0.001443	0	0.017341	0.007899628	0.000464684	0.00325279	0.011617102	36.56	36.560001373291	36.56	100	100	100	99.79	99.7900009155273	99.79	PASS
GPD1	0	0	0	2152	2	0.0001704086	64598	11	0	1	1843	1	0	0	0	0	0.00697026	0	0	0.00697026	39.61	39.6100006103516	39.61	100	100	100	100	100	100	PASS
GPHN	0	0	0	0	0	0	0	0	0	0	0	1	0.005309	0.000131	0	0.00544	0.01115241	0	0.000464684	0.011617094	37.9	37.9000015258789	37.9	100	100	100	98.65	98.6500015258789	98.65	PASS
GPI	0	0	0	2152	4	0.000139412	64598	9	0	1	1843	1	0.000262	0	0	0.000262	0.000464684	0	0	0.000464684	41.38	41.3800010681152	41.38	100	100	100	99.86	99.8600006103516	99.86	PASS
GPIHBP1	0	0	0	2152	1	0.0000154837	64598	1	0	1	1843	1	0	0	0	0	0	0	0	0	37.97	37.9700012207031	37.97	100	100	100	100	100	100	PASS
GPLD1	0	0	0	2152	2	0.0000310415	64598	2	0	1	1843	1	0	0	0	0	0	0	0	0	37.24	37.2400016784668	37.24	100	100	100	99.78	99.7799987792969	99.78	PASS
GPNMB	0	0	0	2152	2	0.0002168325	64598	14	0	1	1843	1	0.001594	0	0	0.001594	0.000929368	0	0	0.000929368	30.54	30.5400009155273	30.54	100	100	100	95.09	95.0899963378906	95.09	PASS
GPR17	0	0	0	2152	1	0.0000154856	64598	1	0	1	1843	1	0	0	0	0	0	0	0	0	43.81	43.810001373291	43.81	100	100	100	100	100	100	PASS
GPR179	3	0.001394052	3	2152	6	0.0002942734	64598	19	2.24405533165633	0.0326221691002812	60.1226576518183	0.613496506651207	0	0	0	0	0	0	0	0	41.9	41.9000015258789	41.9	100	100	100	100	100	100	PASS
GPR68	0	0	0	0	0	0	0	0	0	0	0	1	0	0	0	0	0.00743494	0	0	0.00743494	40.95	40.9500007629395	40.95	100	100	100	100	100	100	PASS
GPSM2	0	0	0	2152	6	0.0005730196	64598	37	0	0.633282795572121	1167.14019223942	1	0.001326	0	0	0.001326	0.003252784	0	0	0.003252784	37.69	37.689998626709	37.69	100	100	100	100	100	100	PASS
GPT2	0	0	0	2152	2	0.0000464626	64598	3	0	1	1843	1	0.000524	0	0	0.000524	0.008829	0	0	0.008829	40.5	40.5	40.5	100	100	100	100	100	100	PASS
GPX1	0	0	0	0	0	0	0	0	0	0	0	1	0.000131	0	0	0.000131	0.007899624	0	0	0.007899624	39.17	39.1699981689453	39.17	100	100	100	100	100	100	PASS
GPX4	0	0	0	0	0	0	0	0	0	0	0	1	0	0	0	0	0.000464684	0	0	0.000464684	42.06	42.060001373291	42.06	100	100	100	100	100	100	PASS
GRAP	0	0	0	2152	1	0.0000309713	64598	2	0	0	0	NA	0	0	0	0	0.000929368	0	0	0.000929368	31.63	31.6299991607666	31.63	81.31	81.3099975585938	81.31	80.52	80.5199966430664	80.52	LOW_DP
GRHL2	0	0	0	2152	1	0.0000154895	64598	1	0	1	1843	1	0.000786	0.000131	0	0.000917	0.013940512	0	0	0.013940512	39.67	39.6699981689453	39.67	100	100	100	100	100	100	PASS
GRHPR	2	0.000929368	2	2152	13	0.0007589672	64598	49	0.292212432247555	0.680543989514128	1254.24257267454	1	0.000131	0	0	0.000131	0	0	0	0	41.7	41.7000007629395	41.7	100	100	100	100	100	100	PASS
GRID2	0	0	0	2152	2	0.0000310059	64598	2	0	1	1843	1	0.032154	0.00197	0	0.034124	0.030669146	0.00232342	0	0.032992566	35.8	35.7999992370605	35.8	100	100	100	99.81	99.8099975585938	99.81	PASS
GRIK2	0	0	0	0	0	0	0	0	0	0	0	1	0.010625	0.001312	0	0.011937	0.002788102	0	0	0.002788102	35.12	35.1199989318848	35.12	100	100	100	98.85	98.8499984741211	98.85	PASS
GRIN1	0	0	0	0	0	0	0	0	0	0	0	1	0	0	0	0	0.00425331	0	0	0.00425331	41.44	41.439998626709	41.44	100	100	100	100	100	100	PASS
GRIP1	0	0	0	0	0	0	0	0	0	0	0	1	0.000786	0.000131	0	0.000917	0.008364318	0	0	0.008364318	35.89	35.8899993896484	35.89	100	100	100	99.96	99.9599990844727	99.96	PASS
GRM1	0	0	0	2152	1	0.0000465087	64598	3	0	1	1843	1	0.003025	0.000131	0	0.003156	0.005576204	0	0.000464684	0.006040888	38.67	38.6699981689453	38.67	100	100	100	99.31	99.3099975585938	99.31	PASS
GRM6	1	0.000464684	1	2152	12	0.0006681512	64598	43	-0.523924645056452	1	1843	1	0	0	0	0	0	0	0	0	39.88	39.8800010681152	39.88	100	100	100	98.36	98.3600006103516	98.36	PASS
GRM7	0	0	0	2152	2	0.0000309703	64598	2	0	1	1843	1	0.003436	0.000786	0.000131	0.004353	0.003252784	0.00139405	0	0.004646834	36.52	36.5200004577637	36.52	100	100	100	99.88	99.879997253418	99.88	PASS
GRN	1	0.000464684	1	2152	5	0.0000774713	64598	5	2.58451611682687	0.178507578700088	328.989467544262	1	0	0	0	0	0	0	0	0	44.01	44.0099983215332	44.01	100	100	100	100	100	100	PASS
GRXCR1	0	0	0	2152	5	0.0005274123	64598	34	0	0.628201474768414	1157.77531799819	1	0.005699	0.000131	0	0.00583	0.002323418	0	0	0.002323418	35.94	35.939998626709	35.94	100	100	100	100	100	100	PASS
GRXCR2	0	0	0	0	0	0	0	0	0	0	0	1	0	0	0	0	0.007434944	0	0	0.007434944	39.96	39.9599990844727	39.96	100	100	100	100	100	100	PASS
GSC	0	0	0	0	0	0	0	0	0	0	0	1	0	0	0	0	0.00743494	0	0	0.00743494	47.65	47.6500015258789	47.65	100	100	100	100	100	100	PASS
GSR	0	0	0	2152	1	0.0000154909	64598	1	0	1	1843	1	0	0	0	0	0	0	0	0	36.05	36.0499992370606	36.05	100	100	100	100	100	100	PASS
GSS	0	0	0	2152	5	0.0001548845	64598	10	0	1	1843	1	0	0	0	0	0	0	0	0	34.58	34.5800018310547	34.58	100	100	100	98.54	98.5400009155273	98.54	PASS
GSTZ1	0	0	0	2152	1	0.0000154943	64598	1	0	1	1843	1	0	0	0	0	0.00743494	0	0	0.00743494	38.88	38.8800010681152	38.88	100	100	100	100	100	100	PASS
GSX2	0	0	0	0	0	0	0	0	0	0	0	1	0	0	0	0	0.001858734	0	0	0.001858734	40.59	40.5900001525879	40.59	100	100	100	100	100	100	PASS
GTF2E2	0	0	0	0	0	0	0	0	0	0	0	1	0.000262	0.000131	0	0.000393	0.000464684	0	0	0.000464684	38.65	38.6500015258789	38.65	100	100	100	100	100	100	PASS
GTPBP2	0	0	0	0	0	0	0	0	0	0	0	1	0	0	0	0	0.000464684	0	0	0.000464684	36.01	36.0099983215332	36.01	100	100	100	100	100	100	PASS
GTPBP3	0	0	0	2152	1	0.000015488	64598	1	0	1	1843	1	0	0	0	0	0.00836431	0	0	0.00836431	39.58	39.5800018310547	39.58	100	100	100	100	100	100	PASS
GUCY1A1	0	0	0	2152	3	0.0000619526	64598	4	0	1	1843	1	0	0	0	0	0.00139405	0	0	0.00139405	36.38	36.3800010681152	36.38	100	100	100	100	100	100	PASS
GUCY2C	0	0	0	2152	2	0.0000464684	64598	3	0	1	1843	1	0.000262	0.000132	0	0.000394	0.00139405	0	0	0.00139405	34.73	34.7299995422363	34.73	100	100	100	99.66	99.6600036621094	99.66	PASS
GUCY2D	2	0.001394052	3	2152	24	0.0009603154	64598	62	0.537704158125653	0.468288429948492	863.05557639507	1	0	0	0	0	0	0	0	0	41.62	41.6199989318848	41.62	100	100	100	100	100	100	PASS
GUF1	0	0	0	2152	1	0.0000929829	64598	6	0	1	1843	1	0	0	0	0	0.002323418	0	0	0.002323418	36.43	36.4300003051758	36.43	100	100	100	100	100	100	PASS
GUSB	0	0	0	2152	12	0.0003408076	64598	22	0	1	1843	1	0	0	0	0	0.00464684	0	0	0.00464684	43.17	43.1699981689453	43.17	100	100	100	100	100	100	PASS
GYG1	1	0.000464684	1	2152	3	0.000913713	64598	59	-0.975491110761304	1	1843	1	0	0	0	0	0.016263944	0	0	0.016263944	37.66	37.6599998474121	37.66	100	100	100	100	100	100	PASS
GYS1	0	0	0	2152	6	0.0001859514	64598	12	0	1	1843	1	0.000525	0	0	0.000525	0.000464684	0	0	0.000464684	40.78	40.7799987792969	40.78	100	100	100	99.92	99.9199981689453	99.92	PASS
GYS2	2	0.0027881	6	2152	11	0.0008983518	64598	58	1.63392987803546	0.0170370695590491	31.3993191973274	0.448561702818963	0.002627	0.000921	0	0.003548	0.00139405	0	0	0.00139405	36.86	36.8600006103516	36.86	100	100	100	100	100	100	PASS
GZF1	0	0	0	0	0	0	0	0	0	0	0	1	0.000262	0	0	0.000262	0	0	0	0	42.2	42.2000007629395	42.2	100	100	100	100	100	100	PASS
H6PD	1	0.000929368	2	2152	2	0.0002167879	64598	14	2.09996573580064	0.0925105255358338	170.496898562542	1	0.000262	0	0	0.000262	0	0	0	0	42.59	42.5900001525879	42.59	100	100	100	100	100	100	PASS
HAAO	0	0	0	2152	1	0.000030977	64598	2	0	1	1843	1	0.000131	0	0	0.000131	0	0	0	0	42.81	42.810001373291	42.81	100	100	100	100	100	100	PASS
HACE1	0	0	0	2152	2	0.0000464977	64598	3	0	1	1843	1	0.009051	0	0	0.009051	0	0	0	0	36.45	36.4500007629395	36.45	100	100	100	99.89	99.8899993896485	99.89	PASS
HADH	0	0	0	2152	1	0.0000154904	64598	1	0	1	1843	1	0.000131	0	0	0.000131	0.001858734	0	0	0.001858734	40.4	40.4000015258789	40.4	100	100	100	100	100	100	PASS
HADHA	1	0.00371747	8	2152	11	0.0018746016	64598	121	0.987737080574657	0.0724165197422843	133.46364588503	1	0	0.001185	0	0.001185	0	0	0	0	37.15	37.1500015258789	37.15	100	100	100	99.64	99.6399993896484	99.64	PASS
HADHB	1	0.000929368	2	2152	6	0.0002882294	64598	19	1.68903246990481	0.145961614274758	269.007255108379	1	0	0	0	0	0	0	0	0	37.4	37.4000015258789	37.4	100	100	100	99.95	99.9499969482422	99.95	PASS
HAMP	0	0	0	0	0	0	0	0	0	0	0	1	0	0	0	0	0.000464684	0	0	0.000464684	34.43	34.4300003051758	34.43	100	100	100	100	100	100	PASS
HARS1	0	0	0	0	0	0	0	0	0	0	0	1	0	0	0	0	0.007434944	0	0	0.007434944	37.51	37.6799983978272	37.85	100	100	100	100	100	100	PASS
HARS2	0	0	0	2152	6	0.0003252114	64598	21	0	1	1843	1	0	0	0	0	0.007434944	0	0	0.007434944	33.97	33.9700012207031	33.97	100	100	100	99.92	99.9199981689453	99.92	PASS
HAVCR2	0	0	0	0	0	0	0	0	0	0	0	1	0	0	0	0	0.007899628	0	0	0.007899628	38.62	38.6199989318848	38.62	100	100	100	100	100	100	PASS
HAX1	0	0	0	2152	3	0.0004186656	64598	27	0	1	1843	1	0.000132	0	0	0.000132	0	0	0	0	35.81	35.810001373291	35.81	100	100	100	99.74	99.7399978637695	99.74	PASS
HBB	1	0.000929368	2	2152	15	0.0009911287	64598	64	-0.0928224355217285	1	1843	1	0	0	0	0	0	0	0	0	29.72	29.7199993133545	29.72	100	100	100	100	100	100	PASS
HELLS	0	0	0	0	0	0	0	0	0	0	0	1	0	0	0	0	0.001394052	0	0	0.001394052	34.75	34.75	34.75	100	100	100	100	100	100	PASS
HEPHL1	0	0	0	2152	3	0.0001858876	64598	12	0	1	1843	1	0.000791	0.003034	0	0.003825	0	0	0	0	35.39	35.3899993896484	35.39	100	100	100	100	100	100	PASS
HERC1	1	0.000464684	1	2152	0	0	64598	0	0	0.0322397003745318	59.4177677902621	0.612554307116105	0.002229	0	0	0.002229	0.00232342	0	0	0.00232342	36.19	36.189998626709	36.19	100	100	100	99.94	99.9400024414063	99.94	PASS
HERC2	0	0	0	2152	1	0.0000154875	64598	1	0	1	1843	1	0.000408	0	0	0.000408	0.007899638	0	0	0.007899638	35.97	35.9700012207031	35.97	99.9	99.9000015258789	99.9	95.08	95.0800018310547	95.08	PASS
HES7	0	0	0	2152	2	0.0000464943	64598	3	0	1	1843	1	0	0	0	0	0	0	0	0	37.9	37.9000015258789	37.9	100	100	100	100	100	100	PASS
HEXA	0	0	0	2152	25	0.0016263899	64598	105	0	0.052425833059562	96.6208103287728	0.8626858065069	0	0	0	0	0	0	0	0	37.78	37.7799987792969	37.78	100	100	100	99.34	99.3399963378906	99.34	PASS
HEXB	0	0	0	2152	14	0.0011772795	64598	76	0	0.181584142151555	334.659573985316	1	0	0	0	0	0.019052044	0	0	0.019052044	36.93	36.9300003051758	36.93	100	100	100	100	100	100	PASS
HFE	0	0	0	2152	4	0.0001084109	64598	7	0	1	1843	1	0	0	0	0	0.000464684	0	0	0.000464684	33.7	33.7000007629395	33.7	100	100	100	100	100	100	PASS
HFM1	0	0	0	0	0	0	0	0	0	0	0	1	0.001049	0	0	0.001049	0.000464684	0	0	0.000464684	35.98	35.9799995422363	35.98	100	100	100	100	100	100	PASS
HGD	3	0.00278854	6	2152	20	0.0017192306	64598	111	0.697746899611689	0.282865674172998	521.321437500836	1	0.000131	0	0	0.000131	0.012081784	0	0	0.012081784	33.68	33.6800003051758	33.68	100	100	100	97.76	97.7600021362305	97.76	PASS
HGF	0	0	0	0	0	0	0	0	0	0	0	1	0	0	0	0	0.00464684	0	0	0.00464684	36.6	36.5999984741211	36.6	100	100	100	99.7	99.6999969482422	99.7	PASS
HGSNAT	1	0.000464684	1	2152	13	0.0003407025	64598	22	0.447737437174627	0.529451277808149	975.778705000419	1	0.000276	0.000262	0	0.000538	0.003252784	0	0	0.003252784	37.36	37.3600006103516	37.36	100	100	100	100	100	100	PASS
HHAT	0	0	0	2152	1	0.0000309674	64598	2	0	1	1843	1	0.002492	0.000131	0	0.002623	0.002323424	0	0	0.002323424	37.93	37.9300003051758	37.93	100	100	100	100	100	100	PASS
HIBCH	0	0	0	2152	5	0.0001859389	64598	12	0	1	1843	1	0.000393	0	0	0.000393	0.00325279	0	0	0.00325279	37.43	37.4300003051758	37.43	100	100	100	100	100	100	PASS
HIKESHI	0	0	0	2152	1	0.0000464684	64598	3	0	1	1843	1	0.000262	0	0	0.000262	0	0	0	0	38.19	38.189998626709	38.19	100	100	100	98.86	98.8600006103516	98.86	PASS
HINT1	1	0.00232342	5	2152	5	0.0005420169	64598	35	2.09984023043354	0.00893457091316552	16.4664141929641	0.299389348962983	0	0	0	0	0.00697026	0	0	0.00697026	40.19	40.189998626709	40.19	100	100	100	100	100	100	PASS
HJV	0	0	0	2152	4	0.0006194148	64598	40	0	0.640674187756305	1180.76252803487	1	0	0	0	0	0.00139405	0	0	0.00139405	36.75	36.75	36.75	100	100	100	100	100	100	PASS
HK1	0	0	0	2152	2	0.0000309707	64598	2	0	1	1843	1	0.00341	0.000262	0	0.003672	0.000929368	0	0	0.000929368	39.8	39.7999992370606	39.8	100	100	100	100	100	100	PASS
HLCS	0	0	0	2152	6	0.0001859475	64598	12	0	1	1843	1	0.002259	0.000131	0	0.00239	0.000464684	0	0	0.000464684	37.44	37.439998626709	37.44	100	100	100	99.96	99.9599990844727	99.96	PASS
HMBS	0	0	0	2152	3	0.0001548692	64598	10	0	1	1843	1	0	0	0	0	0	0	0	0	38.44	38.439998626709	38.44	100	100	100	100	100	100	PASS
HMGCL	0	0	0	2152	4	0.0002013434	64598	13	0	1	1843	1	0	0	0	0	0	0	0	0	35.84	35.8400001525879	35.84	100	100	100	100	100	100	PASS
HMGCS2	1	0.000465116	1	2152	2	0.0005420133	64598	35	-0.220737683615732	1	1843	1	0.000262	0	0	0.000262	0.00139405	0	0	0.00139405	37.91	37.9099998474121	37.91	100	100	100	97.61	97.6100006103516	97.61	PASS
HMX1	0	0	0	0	0	0	0	0	0	0	0	1	0	0	0	0	0	0	0	0	41.03	41.0299987792969	41.03	100	100	100	100	100	100	PASS
HNF1A	0	0	0	2152	3	0.0000774455	64598	5	0	1	1843	1	0	0	0	0	0	0	0	0	37.84	37.8400001525879	37.84	100	100	100	100	100	100	PASS
HNMT	0	0	0	0	0	0	0	0	0	0	0	1	0.000131	0	0	0.000131	0.004182158	0	0	0.004182158	34.84	34.8400001525879	34.84	100	100	100	99.7	99.6999969482422	99.7	PASS
HOGA1	0	0	0	2152	13	0.0003561666	64598	23	0	1	1843	1	0	0	0	0	0	0	0.000464684	0.000464684	39.69	39.689998626709	39.69	100	100	100	98.75	98.75	98.75	PASS
HOXB1	0	0	0	2152	1	0.0000154971	64598	1	0	1	1843	1	0	0	0	0	0.000464684	0	0	0.000464684	38.7	38.7000007629395	38.7	100	100	100	100	100	100	PASS
HOXC13	0	0	0	0	0	0	0	0	0	0	0	1	0	0	0	0	0.00557621	0	0	0.00557621	37.25	37.25	37.25	100	100	100	99.92	99.9199981689453	99.92	PASS
HPCA	0	0	0	2152	1	0.0000154909	64598	1	0	1	1843	1	0.000131	0	0	0.000131	0	0	0	0	35.82	35.8199996948242	35.82	100	100	100	100	100	100	PASS
HPD	0	0	0	2152	1	0.000015489	64598	1	0	1	1843	1	0.000131	0	0	0.000131	0.000929368	0	0	0.000929368	38.27	38.2700004577637	38.27	100	100	100	100	100	100	PASS
HPDL	1	0.000464684	1	2152	1	0.000108457	64598	7	2.09912680080966	0.230628052185011	425.047500176976	1	0	0	0	0	0	0	0	0	43.52	43.5200004577637	43.52	100	100	100	100	100	100	PASS
HPGD	2	0.002788104	6	2152	2	0.0002788313	64598	18	3.32181995259324	0.0000910123089368341	0.167735685370585	0.00798741358907549	0.000131	0	0	0.000131	0	0	0	0	38.13	38.1300010681152	38.13	100	100	100	100	100	100	PASS
HPS1	2	0.0009298	2	2152	9	0.0007284709	64598	47	0.352049083305192	0.672275143898583	1239.00309020509	1	0	0	0	0	0	0	0	0	38.09	38.0900001525879	38.09	100	100	100	100	100	100	PASS
HPS3	0	0	0	2152	6	0.0001703994	64598	11	0	1	1843	1	0.000131	0	0	0.000131	0.012081784	0	0	0.012081784	34.39	34.3899993896484	34.39	100	100	100	98.84	98.8399963378906	98.84	PASS
HPS4	1	0.000464684	1	2152	2	0.0001084238	64598	7	2.09956849482528	0.230628052185011	425.047500176976	1	0	0	0	0	0	0	0	0	36.4	36.4000015258789	36.4	100	100	100	100	100	100	PASS
HPS5	0	0	0	2152	2	0.0000309722	64598	2	0	1	1843	1	0	0.000131	0	0.000131	0	0	0	0	37	37	37	100	100	100	100	100	100	PASS
HPS6	0	0	0	2152	6	0.0001394917	64598	9	0	1	1843	1	0	0	0	0	0	0	0	0	41.25	41.25	41.25	100	100	100	100	100	100	PASS
HPSE2	0	0	0	2152	4	0.0003871821	64598	25	0	1	1843	1	0.00802	0.000524	0	0.008544	0.004182154	0.000464684	0.000464684	0.005111522	34.35	34.3499984741211	34.35	100	100	100	98.97	98.9700012207031	98.97	PASS
HR	0	0	0	0	0	0	0	0	0	0	0	1	0	0	0	0	0	0	0	0	41.37	41.3699989318848	41.37	100	100	100	100	100	100	PASS
HS2ST1	0	0	0	0	0	0	0	0	0	0	0	1	0.004735	0.000394	0	0.005129	0	0	0	0	35.66	35.6599998474121	35.66	100	100	100	99.82	99.8199996948242	99.82	PASS
HSD11B2	0	0	0	2152	4	0.0002013538	64598	13	0	1	1843	1	0	0	0	0	0.008829	0	0	0.008829	41.51	41.5099983215332	41.51	100	100	100	100	100	100	PASS
HSD17B3	0	0	0	2152	8	0.0004645795	64598	30	0	1	1843	1	0.000131	0	0	0.000131	0.005111524	0	0.000464684	0.005576208	34.17	34.1699981689453	34.17	100	100	100	100	100	100	PASS
HSD17B4	2	0.001858734	4	2152	8	0.000387256	64598	25	2.26296082671905	0.0134524187513244	24.7928077586908	0.381427811672167	0.001705	0.000788	0	0.002493	0.01022305	0	0	0.01022305	33.97	33.9700012207031	33.97	100	100	100	99.37	99.370002746582	99.37	PASS
HSD3B2	0	0	0	2152	10	0.0003717558	64598	24	0	1	1843	1	0	0	0	0	0	0	0	0	35.15	35.1500015258789	35.15	100	100	100	100	100	100	PASS
HSD3B7	0	0	0	2152	1	0.0000154818	64598	1	0	1	1843	1	0.002492	0	0	0.002492	0.008829	0	0	0.008829	47.6	47.5999984741211	47.6	100	100	100	100	100	100	PASS
HSF2BP	1	0.000464684	1	2152	1	0.0000464569	64598	3	3.3222851772547	0	0	NA	0.000131	0.000131	0	0.000262	0.00371747	0	0	0.00371747	2021-04-23	23.0400009155273	2021-04-23	59.4	59.4000015258789	59.4	59.4	59.4000015258789	59.4	LOW_DP
HSPA9	1	0.000464684	1	2152	2	0.0000929204	64598	6	2.32218270109828	0.204994629081207	377.805101396664	1	0.000131	0	0	0.000131	0.007434944	0	0	0.007434944	35.81	35.810001373291	35.81	100	100	100	99.91	99.9100036621094	99.91	PASS
HSPG2	0	0	0	2152	3	0.0000464627	64598	3	0	1	1843	1	0.002098	0	0	0.002098	0	0	0	0	41.84	41.8400001525879	41.84	100	100	100	99.82	99.8199996948242	99.82	PASS
HTRA1	0	0	0	2152	5	0.0001394052	64598	9	0	1	1843	1	0	0	0	0	0	0	0	0	34.41	34.4099998474121	34.41	100	100	100	99.62	99.620002746582	99.62	PASS
HTRA2	0	0	0	0	0	0	0	0	0	0	0	1	0	0	0	0	0.000929368	0	0	0.000929368	40.75	40.75	40.75	100	100	100	100	100	100	PASS
HTT	1	0.00236742	5	2152	4	0.0133872851	64598	865	-2.49947583624216	0.000000179027437437347	0.000329947567197031	0.000047135366742433	0.000396	0	0	0.000396	0	0	0	0	38.4	38.4000015258789	38.4	100	100	100	99.45	99.4499969482422	99.45	PASS
HYAL1	0	0	0	2152	2	0.0000309679	64598	2	0	1	1843	1	0	0	0	0	0.007899624	0	0	0.007899624	43.56	43.560001373291	43.56	100	100	100	100	100	100	PASS
HYDIN	0	0	0	2152	1	0.000046516	64598	3	0	0	0	NA	0.004589	0	0	0.004589	0.008829	0	0	0.008829	30.36	30.3600006103516	30.36	97.84	97.8399963378906	97.84	85.42	85.4199981689453	85.42	LOW_DP
HYOU1	0	0	0	0	0	0	0	0	0	0	0	1	0.000131	0	0	0.000131	0	0	0	0	36.85	36.8499984741211	36.85	100	100	100	100	100	100	PASS
IARS1	0	0	0	2152	4	0.000170352	64598	11	0	1	1843	1	0	0	0	0	0.000464684	0	0	0.000464684	34.95	34.9500007629395	34.95	100	100	100	99.78	99.7799987792969	99.78	PASS
IARS2	0	0	0	0	0	0	0	0	0	0	0	1	0.001443	0	0	0.001443	0.01905205	0	0	0.01905205	35.09	35.0900001525879	35.09	100	100	100	99.44	99.4400024414062	99.44	PASS
IBA57	0	0	0	0	0	0	0	0	0	0	0	1	0	0	0	0	0	0	0	0	38.26	38.2599983215332	38.26	100	100	100	99.85	99.8499984741211	99.85	PASS
ICOS	0	0	0	2152	1	0.0000464698	64598	3	0	1	1843	1	0	0	0	0	0.000464684	0	0	0.000464684	38.25	38.25	38.25	100	100	100	100	100	100	PASS
IDH3A	0	0	0	2152	4	0.0002632643	64598	17	0	1	1843	1	0	0	0	0	0	0	0	0	38.41	38.4099998474121	38.41	100	100	100	99.89	99.8899993896485	99.89	PASS
IDUA	5	0.003254087	7	2152	35	0.0041091494	64598	265	-0.336586961948469	0.729222993881977	1343.95797772448	1	0.000134	0	0	0.000134	0.000464684	0	0	0.000464684	43.22	43.2200012207031	43.22	100	100	100	100	100	100	PASS
IFNAR2	0	0	0	2152	1	0.0000464871	64598	3	0	1	1843	1	0	0.000262	0	0.000262	0	0	0	0	36.42	36.4199981689453	36.42	100	100	100	99.6	99.5999984741211	99.6	PASS
IFNG	0	0	0	0	0	0	0	0	0	0	0	1	0	0	0	0	0.00557621	0	0	0.00557621	39.78	39.7799987792969	39.78	100	100	100	100	100	100	PASS
IFNGR1	0	0	0	2152	1	0.0000154842	64598	1	0	1	1843	1	0	0	0	0	0.000464684	0	0	0.000464684	39.24	39.2400016784668	39.24	100	100	100	100	100	100	PASS
IFNGR2	0	0	0	2152	1	0.0000312774	64598	2	0	1	1843	1	0	0.000262	0	0.000262	0	0	0	0	42.95	42.9500007629395	42.95	100	100	100	100	100	100	PASS
IFT122	0	0	0	0	0	0	0	0	0	0	0	1	0.000131	0	0	0.000131	0.012081784	0	0	0.012081784	40.66	40.6599998474121	40.66	100	100	100	100	100	100	PASS
IFT140	0	0	0	2152	19	0.0007898016	64598	51	0	0.414409007347437	763.755800541326	1	0.000655	0.000134	0	0.000789	0.000929368	0	0	0.000929368	44.8	44.7999992370606	44.8	100	100	100	100	100	100	PASS
IFT172	0	0	0	2152	9	0.000325216	64598	21	0	1	1843	1	0	0	0	0	0	0	0	0	35.69	35.689998626709	35.69	100	100	100	100	100	100	PASS
IFT27	0	0	0	2152	2	0.0001238697	64598	8	0	1	1843	1	0.000131	0	0	0.000131	0	0	0	0	38.13	38.1300010681152	38.13	100	100	100	94.07	94.0699996948242	94.07	PASS
IFT43	0	0	0	2152	2	0.0000309784	64598	2	0	1	1843	1	0	0.000131	0	0.000131	0.00743494	0	0	0.00743494	39.15	39.1500015258789	39.15	100	100	100	100	100	100	PASS
IFT52	2	0.000929368	2	2152	3	0.0000619445	64598	4	3.90720187333964	0.0142930331018888	26.3420600067811	0.393165074728076	0.000262	0	0	0.000262	0	0	0	0	40.04	40.0400009155273	40.04	100	100	100	100	100	100	PASS
IFT57	0	0	0	0	0	0	0	0	0	0	0	1	0	0	0	0	0.008364308	0	0	0.008364308	36.51	36.5099983215332	36.51	100	100	100	100	100	100	PASS
IFT74	0	0	0	2152	1	0.0000774881	64598	5	0	1	1843	1	0	0.000131	0	0.000131	0	0	0	0	38.02	38.0200004577637	38.02	100	100	100	100	100	100	PASS
IFT80	0	0	0	2152	3	0.0000464875	64598	3	0	1	1843	1	0.000133	0	0	0.000133	0.007434944	0	0	0.007434944	34.76	34.7599983215332	34.76	100	100	100	99.93	99.9300003051758	99.93	PASS
IFT81	0	0	0	2152	8	0.0003562994	64598	23	0	1	1843	1	0.000524	0	0	0.000524	0.00511152	0.008829	0	0.01394052	36.54	36.5400009155273	36.54	100	100	100	100	100	100	PASS
IGF1	0	0	0	2152	1	0.0000154909	64598	1	0	1	1843	1	0.000262	0	0	0.000262	0.01068773	0	0	0.01068773	36.71	36.7099990844727	36.71	100	100	100	99.8	99.8000030517578	99.8	PASS
IGFALS	0	0	0	2152	2	0.0002013392	64598	13	0	1	1843	1	0	0	0	0	0	0	0	0	47.17	47.1699981689453	47.17	100	100	100	100	100	100	PASS
IGFBP7	0	0	0	2152	1	0.0000619521	64598	4	0	1	1843	1	0.000395	0.000393	0	0.000788	0.001858734	0	0	0.001858734	34.25	34.25	34.25	100	100	100	97.79	97.7900009155274	97.79	PASS
IGHMBP2	2	0.000929368	2	2152	17	0.0012390076	64598	80	-0.414863160973259	1	1843	1	0	0	0	0	0.000464684	0	0	0.000464684	40.75	40.75	40.75	100	100	100	100	100	100	PASS
IGLL1	0	0	0	0	0	0	0	0	0	0	0	1	0	0	0	0	0	0	0	0	38.77	38.7700004577637	38.77	100	100	100	100	100	100	PASS
IGSF3	0	0	0	0	0	0	0	0	0	0	0	1	0.00118	0	0	0.00118	0	0	0	0	37.64	37.6399993896484	37.64	100	100	100	100	100	100	PASS
IKBKB	0	0	0	0	0	0	0	0	0	0	0	1	0.000131	0.000131	0	0.000262	0.003252784	0	0	0.003252784	37.31	37.310001373291	37.31	100	100	100	100	100	100	PASS
IL10RA	0	0	0	2152	3	0.0000929113	64598	6	0	1	1843	1	0	0.000262	0	0.000262	0	0	0	0	39.36	39.3600006103516	39.36	100	100	100	99.92	99.9199981689453	99.92	PASS
IL10RB	0	0	0	2152	2	0.0000464651	64598	3	0	1	1843	1	0	0	0	0	0	0.000464684	0	0.000464684	38.43	38.4300003051758	38.43	100	100	100	100	100	100	PASS
IL11RA	0	0	0	2152	3	0.0002168122	64598	14	0	1	1843	1	0	0	0	0	0	0	0	0	36.7	36.7000007629395	36.7	100	100	100	99.07	99.0699996948242	99.07	PASS
IL12B	0	0	0	2152	2	0.0000310048	64598	2	0	1	1843	1	0	0	0	0	0.007434944	0	0	0.007434944	35.24	35.2400016784668	35.24	100	100	100	100	100	100	PASS
IL12RB1	0	0	0	2152	3	0.0002169809	64598	14	0	1	1843	1	0.004591	0.000131	0	0.004722	0.00836431	0	0	0.00836431	34.3	34.2999992370606	34.3	100	100	100	98.63	98.629997253418	98.63	PASS
IL17RA	0	0	0	0	0	0	0	0	0	0	0	1	0.003279	0	0	0.003279	0	0	0	0	39.7	39.7000007629395	39.7	100	100	100	99.9	99.9000015258789	99.9	PASS
IL17RC	0	0	0	2152	1	0.0000154923	64598	1	0	1	1843	1	0	0	0	0	0	0	0	0	41.8	41.7999992370606	41.8	100	100	100	100	100	100	PASS
IL1RN	0	0	0	2152	1	0.0000154871	64598	1	0	1	1843	1	0.002025	0	0	0.002025	0.005111526	0	0	0.005111526	36.24	36.2400016784668	36.24	100	100	100	100	100	100	PASS
IL21	0	0	0	2152	1	0.0000154828	64598	1	0	1	1843	1	0.000131	0	0	0.000131	0.00139405	0	0	0.00139405	36.99	36.9900016784668	36.99	100	100	100	100	100	100	PASS
IL21R	0	0	0	2152	1	0.0000309751	64598	2	0	1	1843	1	0	0	0	0	0.004182164	0	0	0.004182164	38.7	38.7000007629395	38.7	100	100	100	99.88	99.879997253418	99.88	PASS
IL2RA	1	0.000464684	1	2152	0	0	64598	0	0	0.0322397003745318	59.4177677902621	0.612554307116105	0.000393	0.000262	0	0.000655	0.000929368	0	0	0.000929368	37.19	37.189998626709	37.19	100	100	100	100	100	100	PASS
IL36RN	0	0	0	0	0	0	0	0	0	0	0	1	0	0	0	0	0.005111526	0	0	0.005111526	36.27	36.2700004577637	36.27	100	100	100	99.74	99.7399978637695	99.74	PASS
IL6	0	0	0	0	0	0	0	0	0	0	0	1	0	0	0	0	0.000929368	0	0	0.000929368	35.8	35.7999992370605	35.8	100	100	100	100	100	100	PASS
IL6R	0	0	0	0	0	0	0	0	0	0	0	1	0.000131	0	0	0.000131	0	0	0	0	36.27	36.2700004577637	36.27	100	100	100	99.7	99.6999969482422	99.7	PASS
IL6ST	0	0	0	0	0	0	0	0	0	0	0	1	0	0	0	0	0.00929368	0	0	0.00929368	37.21	37.2099990844727	37.21	100	100	100	100	100	100	PASS
IL7	0	0	0	0	0	0	0	0	0	0	0	1	0.000262	0	0	0.000262	0.003252784	0	0	0.003252784	36.44	36.439998626709	36.44	100	100	100	99.08	99.0800018310547	99.08	PASS
IL7R	0	0	0	2152	7	0.000247976	64598	16	0	1	1843	1	0	0	0	0	0.00929368	0	0	0.00929368	35.47	35.4700012207031	35.47	100	100	100	99.37	99.370002746582	99.37	PASS
ILDR1	2	0.0009298	2	2152	4	0.0006504985	64598	42	0.515374695654861	0.653308482667384	1204.04753355599	1	0.000131	0	0	0.000131	0.012081784	0	0	0.012081784	35.45	35.4500007629395	35.45	100	100	100	98.23	98.2300033569336	98.23	PASS
IMPA1	0	0	0	0	0	0	0	0	0	0	0	1	0.000131	0	0	0.000131	0.0027881	0	0	0.0027881	33.7	33.7000007629395	33.7	100	100	100	100	100	100	PASS
IMPG2	0	0	0	2152	12	0.0004182676	64598	27	0	1	1843	1	0.000393	0	0	0.000393	0.007899624	0	0	0.007899624	34.27	34.2700004577637	34.27	99.87	99.870002746582	99.87	98.96	98.9599990844727	98.96	PASS
INPP5E	0	0	0	2152	10	0.0002834937	64598	18	0	1	1843	1	0	0	0	0	0	0	0	0	42.82	42.8199996948242	42.82	100	100	100	100	100	100	PASS
INPP5K	0	0	0	2152	3	0.0000464598	64598	3	0	1	1843	1	0.000787	0	0	0.000787	0	0	0.000464684	0.000464684	41.32	41.3199996948242	41.32	100	100	100	100	100	100	PASS
INPPL1	0	0	0	2152	1	0.0000154909	64598	1	0	1	1843	1	0.000131	0	0	0.000131	0	0	0	0	38.05	38.0499992370606	38.05	100	100	100	100	100	100	PASS
INS	0	0	0	2152	5	0.0002169958	64598	14	0	1	1843	1	0	0	0	0	0	0	0	0	40.69	40.689998626709	40.69	100	100	100	100	100	100	PASS
INSL3	1	0.000465116	1	2152	1	0.0000154851	64598	1	4.90863796463408	0.0634404698960828	116.920786018481	0.927942746178418	0	0	0	0	0	0	0	0	48.68	48.6800003051758	48.68	100	100	100	100	100	100	PASS
INSR	0	0	0	2152	6	0.0001084354	64598	7	0	1	1843	1	0.001049	0.001715	0	0.002764	0.01579926	0.000464684	0	0.016263944	37.47	37.4700012207031	37.47	100	100	100	99.54	99.5400009155274	99.54	PASS
INTS1	0	0	0	2152	2	0.000108421	64598	7	0	1	1843	1	0	0	0	0	0	0	0	0	43.07	43.0699996948242	43.07	100	100	100	100	100	100	PASS
INTS8	0	0	0	0	0	0	0	0	0	0	0	1	0.000793	0	0	0.000793	0.003717468	0	0	0.003717468	36.32	36.3199996948242	36.32	100	100	100	100	100	100	PASS
INTU	0	0	0	2152	1	0.0000619905	64598	4	0	1	1843	1	0.000262	0	0	0.000262	0.001858734	0	0	0.001858734	35.57	35.5699996948242	35.57	100	100	100	98.56	98.5599975585938	98.56	PASS
INVS	1	0.000464684	1	2152	6	0.000247803	64598	16	0.907056317412137	0.427173431482454	787.280634222162	1	0	0	0	0	0.00232342	0	0	0.00232342	35.45	35.4500007629395	35.45	100	100	100	99.19	99.1900024414063	99.19	PASS
IQCB1	1	0.000929368	2	2152	10	0.0006828018	64598	44	0.4447831092277	0.660548191652714	1217.39031721595	1	0	0	0	0	0.012081784	0	0	0.012081784	35.52	35.5200004577637	35.52	100	100	100	99.92	99.9199981689453	99.92	PASS
IQCE	1	0.00325279	7	2152	3	0.0024470809	64598	158	0.410615887635731	0.38017688654571	700.666001903744	1	0.001967	0	0	0.001967	0.004646844	0	0	0.004646844	39.87	39.8699989318848	39.87	100	100	100	100	100	100	PASS
IQSEC1	0	0	0	2152	2	0.0000309751	64598	2	0	1	1843	1	0.002098	0.006164	0	0.008262	0	0	0	0	39.45	39.4500007629395	39.45	100	100	100	99.68	99.6800003051758	99.68	PASS
IRAK4	1	0.000464684	1	2152	2	0.0006661553	64598	43	-0.519608579475212	1	1843	1	0	0	0	0	0.00697026	0	0	0.00697026	35.07	35.0699996948242	35.07	100	100	100	99.42	99.4199981689453	99.42	PASS
IREB2	0	0	0	0	0	0	0	0	0	0	0	1	0.000262	0	0	0.000262	0	0	0	0	35.14	35.1399993896484	35.14	100	100	100	99.65	99.6500015258789	99.65	PASS
IRF7	0	0	0	2152	1	0.0000154851	64598	1	0	1	1843	1	0	0	0	0	0	0	0	0	47.79	47.7900009155273	47.79	100	100	100	100	100	100	PASS
IRF8	0	0	0	0	0	0	0	0	0	0	0	1	0	0.000264	0	0.000264	0.008829	0	0	0.008829	39.77	39.7700004577637	39.77	100	100	100	100	100	100	PASS
IRF9	0	0	0	0	0	0	0	0	0	0	0	1	0.000131	0	0	0.000131	0	0	0	0	41.24	41.2400016784668	41.24	100	100	100	100	100	100	PASS
IRX5	0	0	0	0	0	0	0	0	0	0	0	1	0	0	0	0	0.008829	0	0	0.008829	38.43	38.4300003051758	38.43	100	100	100	100	100	100	PASS
ISCA1	0	0	0	0	0	0	0	0	0	0	0	1	0	0	0	0	0.000929368	0	0	0.000929368	39.66	39.6599998474121	39.66	100	100	100	100	100	100	PASS
ISCA2	0	0	0	2152	1	0.0000619828	64598	4	0	1	1843	1	0	0	0	0	0.00743494	0	0	0.00743494	36.87	36.8699989318848	36.87	100	100	100	100	100	100	PASS
ISCU	0	0	0	2152	1	0.0000154871	64598	1	0	1	1843	1	0	0	0	0	0	0	0	0	36.43	36.4300003051758	36.43	100	100	100	100	100	100	PASS
ITCH	0	0	0	0	0	0	0	0	0	0	0	1	0.000788	0	0	0.000788	0.000464684	0	0	0.000464684	35.93	35.9300003051758	35.93	100	100	100	99.99	99.9899978637695	99.99	PASS
ITGA2B	0	0	0	2152	14	0.0003563707	64598	23	0	1	1843	1	0	0	0	0	0	0	0	0	37.33	37.3300018310547	37.33	100	100	100	96.59	96.5899963378906	96.59	PASS
ITGA3	0	0	0	2152	2	0.0000774286	64598	5	0	1	1843	1	0.000131	0	0	0.000131	0.000464684	0	0	0.000464684	37.91	37.9099998474121	37.91	100	100	100	98.25	98.25	98.25	PASS
ITGA6	0	0	0	0	0	0	0	0	0	0	0	1	0.000131	0.000131	0	0.000262	0.008828994	0	0	0.008828994	37.99	37.9900016784668	37.99	100	100	100	99.23	99.2300033569336	99.23	PASS
ITGA7	1	0.000465983	1	2152	4	0.0000619949	64598	4	2.91005588098454	0.151138487767055	278.548232954682	1	0.000262	0	0	0.000262	0.00557621	0	0	0.00557621	35.98	35.9799995422363	35.98	100	100	100	100	100	100	PASS
ITGA8	0	0	0	2152	1	0.000046503	64598	3	0	1	1843	1	0.000525	0.000262	0	0.000787	0	0	0	0	37.21	37.2099990844727	37.21	100	100	100	99.8	99.8000030517578	99.8	PASS
ITGB2	1	0.000464684	1	2152	8	0.000309749	64598	20	0.585150346079333	0.497566813579624	917.015637427247	1	0	0	0	0	0	0	0	0	43.83	43.8300018310547	43.83	100	100	100	100	100	100	PASS
ITGB4	0	0	0	2152	4	0.000092946	64598	6	0	1	1843	1	0	0	0	0	0	0	0	0	42.67	42.6699981689453	42.67	100	100	100	99.72	99.7200012207031	99.72	PASS
ITGB6	0	0	0	2152	2	0.0000464684	64598	3	0	1	1843	1	0.001968	0	0	0.001968	0.00325279	0	0	0.00325279	35.63	35.6300010681152	35.63	100	100	100	100	100	100	PASS
ITK	0	0	0	0	0	0	0	0	0	0	0	1	0.000131	0	0	0.000131	0.007434944	0	0	0.007434944	32.85	32.8499984741211	32.85	100	100	100	99.95	99.9499969482422	99.95	PASS
ITPA	1	0.000464684	1	2152	3	0.0000929474	64598	6	2.32176355623965	0.204994629081207	377.805101396664	1	0.000524	0	0	0.000524	0	0	0	0	38.72	38.7200012207031	38.72	100	100	100	100	100	100	PASS
ITPR2	0	0	0	0	0	0	0	0	0	0	0	1	0.001312	0	0	0.001312	0.008364312	0	0.000464684	0.008828996	35.21	35.2099990844727	35.21	100	100	100	100	100	100	PASS
IVD	1	0.00139405	3	2152	13	0.0017653392	64598	114	-0.340663108998486	1	1843	1	0.000406	0.000132	0	0.000538	0.000464684	0	0	0.000464684	40.88	40.8800010681152	40.88	100	100	100	100	100	100	PASS
IYD	0	0	0	2152	3	0.0005111195	64598	33	0	0.627114656566696	1155.77231205242	1	0.002624	0	0	0.002624	0.005576204	0	0	0.005576204	38.08	38.0800018310547	38.08	100	100	100	100	100	100	PASS
JAGN1	0	0	0	2152	2	0.0000464579	64598	3	0	1	1843	1	0	0	0	0	0	0	0	0	34.49	34.4900016784668	34.49	100	100	100	99.4	99.4000015258789	99.4	PASS
JAK3	1	0.000464684	1	2152	5	0.0000774737	64598	5	2.58447142396039	0.178507578700088	328.989467544262	1	0	0	0	0	0.00836431	0	0	0.00836431	37.59	37.5900001525879	37.59	100	100	100	98.55	98.5500030517578	98.55	PASS
JAM2	0	0	0	2152	2	0.0000619444	64598	4	0	1	1843	1	0.000149	0	0	0.000149	0	0	0	0	39.65	39.6500015258789	39.65	100	100	100	100	100	100	PASS
JAM3	1	0.000464684	1	2152	1	0.0000154904	64598	1	4.90680366719231	0.0634404698960828	116.920786018481	0.927942746178418	0.000262	0	0	0.000262	0	0	0	0	40.18	40.1800003051758	40.18	100	100	100	100	100	100	PASS
JUP	0	0	0	2152	1	0.0000154899	64598	1	0	1	1843	1	0	0	0	0	0	0	0	0	37.97	37.9700012207031	37.97	100	100	100	99.07	99.0699996948242	99.07	PASS
KANK2	0	0	0	2152	1	0.0000154943	64598	1	0	1	1843	1	0.000131	0	0	0.000131	0.00836431	0	0	0.00836431	38.56	38.560001373291	38.56	100	100	100	99.87	99.870002746582	99.87	PASS
KARS1	0	0	0	2152	4	0.0002787423	64598	18	0	1	1843	1	0	0	0	0	0.008829	0	0	0.008829	37.52	37.8050003051758	38.09	100	100	100	100	100	100	PASS
KATNB1	0	0	0	0	0	0	0	0	0	0	0	1	0	0	0	0	0.008829	0	0	0.008829	41.87	41.8699989318848	41.87	100	100	100	100	100	100	PASS
KATNIP	0	0	0	2152	5	0.0005730387	64598	37	0	0	0	NA	0	0	0	0	0	0	0	0	0	0	0	0	0	0	0	0	0	LOW_DP
KCNJ1	0	0	0	2152	6	0.0004336573	64598	28	0	1	1843	1	0	0	0	0	0	0	0	0	37.4	37.4000015258789	37.4	100	100	100	100	100	100	PASS
KCNJ10	0	0	0	2152	2	0.0000309703	64598	2	0	1	1843	1	0	0	0	0	0.00185874	0	0	0.00185874	35.01	35.0099983215332	35.01	100	100	100	100	100	100	PASS
KCNMA1	0	0	0	0	0	0	0	0	0	0	0	1	0.009575	0.000393	0	0.009968	0.001394052	0	0	0.001394052	36.87	36.8699989318848	36.87	100	100	100	98.81	98.8099975585938	98.81	PASS
KCNQ1	0	0	0	2152	27	0.000495711	64598	32	0	0.626368259711495	1154.39670264828	1	0.00328	0.000263	0	0.003543	0.007434948	0	0	0.007434948	41.75	41.75	41.75	100	100	100	100	100	100	PASS
KCNV2	0	0	0	2152	9	0.0005265135	64598	34	0	0.628201474768414	1157.77531799819	1	0.003873	0	0	0.003873	0	0	0	0	41.38	41.3800010681152	41.38	100	100	100	100	100	100	PASS
KCTD7	0	0	0	2152	1	0.0000154851	64598	1	0	1	1843	1	0.001312	0	0	0.001312	0.00464684	0	0	0.00464684	36.86	36.8600006103516	36.86	100	100	100	99.86	99.8600006103516	99.86	PASS
KDM5B	0	0	0	2152	1	0.0000154885	64598	1	0	1	1843	1	0.000262	0	0	0.000262	0.00185874	0.000464684	0	0.002323424	35.88	35.8800010681152	35.88	100	100	100	99.81	99.8099975585938	99.81	PASS
KDSR	0	0	0	0	0	0	0	0	0	0	0	1	0.000393	0	0	0.000393	0.002788104	0	0	0.002788104	40.25	40.25	40.25	100	100	100	100	100	100	PASS
KERA	0	0	0	2152	3	0.0003439503	64598	22	0	1	1843	1	0	0	0	0	0.00557621	0	0	0.00557621	35.15	35.1500015258789	35.15	100	100	100	100	100	100	PASS
KHDC3L	0	0	0	2152	3	0.0000774296	64598	5	0	1	1843	1	0	0	0	0	0.000464684	0	0	0.000464684	42.78	42.7799987792969	42.78	100	100	100	100	100	100	PASS
KHK	0	0	0	0	0	0	0	0	0	0	0	1	0.000404	0	0	0.000404	0	0	0	0	41.84	41.8400001525879	41.84	100	100	100	100	100	100	PASS
KIAA0586	0	0	0	2152	6	0.0052027868	64598	336	0	0.0000320641757240413	0.0590942758594081	0.00422101970424344	0.000262	0.004987	0	0.005249	0.00743494	0	0	0.00743494	36.43	36.4300003051758	36.43	100	100	100	100	100	100	PASS
KIAA0753	0	0	0	2152	5	0.0001858567	64598	12	0	1	1843	1	0	0.000131	0	0.000131	0	0	0	0	37.62	37.6199989318848	37.62	100	100	100	100	100	100	PASS
KIAA0825	0	0	0	0	0	0	0	0	0	0	0	1	0.000786	0.001724	0	0.00251	0.010687734	0	0	0.010687734	36.76	36.7599983215332	36.76	100	100	100	96.67	96.6699981689453	96.67	PASS
KIAA1109	1	0.000465116	1	2152	2	0.0000619632	64598	4	2.90810701238889	0.151138487767055	278.548232954682	1	0.000918	0	0	0.000918	0.00139405	0.00139405	0	0.0027881	36.18	36.1800003051758	36.18	100	100	100	99.97	99.9700012207031	99.97	PASS
KIAA1549	0	0	0	0	0	0	0	0	0	0	0	1	0.000786	0	0	0.000786	0	0	0	0	37.74	37.7400016784668	37.74	100	100	100	99.94	99.9400024414063	99.94	PASS
KIF14	0	0	0	2152	1	0.0000154885	64598	1	0	1	1843	1	0	0.000395	0	0.000395	0.00185874	0	0	0.00185874	33.97	33.9700012207031	33.97	100	100	100	99.79	99.7900009155273	99.79	PASS
KIF1A	0	0	0	2152	3	0.0000464617	64598	3	0	1	1843	1	0.000262	0	0	0.000262	0	0	0	0	40.88	40.8800010681152	40.88	100	100	100	99.9	99.9000015258789	99.9	PASS
KIF1C	0	0	0	2152	2	0.0000309794	64598	2	0	1	1843	1	0.000131	0	0	0.000131	0	0	0.000464684	0.000464684	38.19	38.189998626709	38.19	100	100	100	98.51	98.5100021362305	98.51	PASS
KIF7	2	0.000929368	2	2152	9	0.0002633825	64598	17	1.81909047945368	0.123859333520701	228.272751678652	1	0	0	0	0	0	0	0	0	41.08	41.0800018310547	41.08	100	100	100	100	100	100	PASS
KIFBP	0	0	0	2152	1	0.0000929685	64598	6	0	1	1843	1	0.001313	0	0	0.001313	0.000464684	0	0	0.000464684	39.38	39.3800010681152	39.38	100	100	100	99.69	99.6900024414063	99.69	PASS
KIRREL1	1	0.000464684	1	2152	1	0.00128539	64598	83	-1.46788427779929	0.528531748503008	974.084012491044	1	0	0.000394	0	0.000394	0.000464684	0	0	0.000464684	37.27	37.2700004577637	37.27	100	100	100	99.14	99.1399993896484	99.14	PASS
KISS1	0	0	0	0	0	0	0	0	0	0	0	1	0	0	0	0	0.00185874	0	0	0.00185874	2021-05-31	2021-05-31	2021-05-31	100	100	100	91.32	91.3199996948242	91.32	PASS
KISS1R	0	0	0	2152	4	0.0002013539	64598	13	0	1	1843	1	0	0	0	0	0	0	0	0	46.85	46.8499984741211	46.85	100	100	100	100	100	100	PASS
KIZ	0	0	0	2152	10	0.0004491082	64598	29	0	1	1843	1	0.004863	0	0	0.004863	0.003252784	0	0	0.003252784	35.7	35.7000007629395	35.7	100	100	100	100	100	100	PASS
KL	0	0	0	2152	2	0.0000464588	64598	3	0	1	1843	1	0.000131	0	0.000131	0.000262	0	0	0	0	38.06	38.060001373291	38.06	100	100	100	98.84	98.8399963378906	98.84	PASS
KLC2	0	0	0	2152	1	0.0000619521	64598	4	0	1	1843	1	0	0	0	0	0	0	0	0	40.86	40.8600006103516	40.86	100	100	100	100	100	100	PASS
KLHDC8B	1	0.00650558	14	2152	1	0.00806776	64598	521	-0.310490482199938	0.537476986945018	990.570086939668	1	0	0	0	0	0.007899624	0	0	0.007899624	40.21	40.2099990844727	40.21	100	100	100	100	100	100	PASS
KLHL40	0	0	0	2152	4	0.000108419	64598	7	0	1	1843	1	0	0	0	0	0.007899624	0	0	0.007899624	41.4	41.4000015258789	41.4	100	100	100	100	100	100	PASS
KLHL41	0	0	0	2152	1	0.000030978	64598	2	0	1	1843	1	0	0	0	0	0.00325279	0	0	0.00325279	36.36	36.3600006103516	36.36	100	100	100	96.63	96.629997253418	96.63	PASS
KLHL7	0	0	0	2152	2	0.0000309755	64598	2	0	1	1843	1	0.000132	0.000131	0	0.000263	0.000929368	0	0	0.000929368	40.41	40.4099998474121	40.41	100	100	100	100	100	100	PASS
KLK4	0	0	0	0	0	0	0	0	0	0	0	1	0.002099	0	0	0.002099	0.000464684	0	0	0.000464684	2021-03-30	30.0300006866455	2021-03-30	100	100	100	88.49	88.4899978637695	88.49	LOW_DP
KLKB1	0	0	0	2152	3	0.0002013366	64598	13	0	1	1843	1	0	0	0	0	0	0	0	0	33.96	33.9599990844727	33.96	100	100	100	100	100	100	PASS
KNG1	0	0	0	0	0	0	0	0	0	0	0	1	0	0	0	0	0.000464684	0	0	0.000464684	36.41	36.4099998474121	36.41	100	100	100	99.82	99.8199996948242	99.82	PASS
KNL1	0	0	0	0	0	0	0	0	0	0	0	1	0.000131	0	0	0.000131	0.00139405	0	0	0.00139405	37.52	37.5200004577637	37.52	100	100	100	100	100	100	PASS
KNSTRN	1	0.000464684	1	2152	1	0.000139366	64598	9	1.73737132937828	0.279443124762769	515.013678937783	1	0	0	0	0	0	0	0	0	40.91	40.9099998474121	40.91	100	100	100	100	100	100	PASS
KPTN	0	0	0	2152	3	0.0011623433	64598	75	0	0.18021314630784	332.132828645349	1	0.004066	0	0	0.004066	0.000464684	0	0	0.000464684	36.96	36.9599990844727	36.96	100	100	100	100	100	100	PASS
KREMEN1	0	0	0	0	0	0	0	0	0	0	0	1	0.000551	0	0	0.000551	0	0.000464684	0	0.000464684	38.29	38.2900009155273	38.29	100	100	100	100	100	100	PASS
KRT14	0	0	0	2152	4	0.0001084296	64598	7	0	1	1843	1	0	0	0	0	0	0	0	0	35.81	35.810001373291	35.81	100	100	100	100	100	100	PASS
KRT18	0	0	0	0	0	0	0	0	0	0	0	1	0	0	0	0	0.00557621	0	0	0.00557621	40.58	40.5800018310547	40.58	100	100	100	100	100	100	PASS
KRT25	0	0	0	2152	1	0.000077421	64598	5	0	1	1843	1	0.000131	0	0	0.000131	0	0	0	0	38.74	38.7400016784668	38.74	100	100	100	98.98	98.9800033569336	98.98	PASS
KRT5	0	0	0	2152	2	0.0000309703	64598	2	0	1	1843	1	0.000131	0	0	0.000131	0.00557621	0	0	0.00557621	34.4	34.4000015258789	34.4	100	100	100	99	99	99	PASS
KRT74	0	0	0	0	0	0	0	0	0	0	0	1	0	0	0	0	0.00557621	0	0	0.00557621	37.32	37.3199996948242	37.32	100	100	100	99.78	99.7799987792969	99.78	PASS
KRT8	0	0	0	2152	1	0.000371678	64598	24	0	1	1843	1	0	0.000131	0	0.000131	0.00557621	0	0	0.00557621	38.05	38.0499992370606	38.05	100	100	100	100	100	100	PASS
KRT83	0	0	0	0	0	0	0	0	0	0	0	1	0	0	0	0	0.00557621	0	0	0.00557621	40.07	40.0699996948242	40.07	100	100	100	100	100	100	PASS
KRT85	0	0	0	0	0	0	0	0	0	0	0	1	0	0	0	0	0.00557621	0	0	0.00557621	37.39	37.3899993896484	37.39	100	100	100	100	100	100	PASS
KY	0	0	0	0	0	0	0	0	0	0	0	1	0.000131	0	0	0.000131	0.013011152	0	0	0.013011152	37.68	37.6800003051758	37.68	100	100	100	100	100	100	PASS
KYNU	0	0	0	2152	3	0.0001549436	64598	10	0	1	1843	1	0.000265	0	0	0.000265	0.004182158	0	0	0.004182158	33.74	33.7400016784668	33.74	100	100	100	99.22	99.2200012207031	99.22	PASS
L2HGDH	0	0	0	2152	5	0.000139476	64598	9	0	1	1843	1	0.000526	0.001049	0	0.001575	0.007899624	0	0	0.007899624	33.79	33.7900009155273	33.79	100	100	100	98.36	98.3600006103516	98.36	PASS
LACC1	0	0	0	2152	1	0.0000154923	64598	1	0	1	1843	1	0	0	0	0	0.000464684	0	0	0.000464684	35.17	35.1699981689453	35.17	100	100	100	98.59	98.5899963378906	98.59	PASS
LAMA1	0	0	0	2152	13	0.0006195168	64598	40	0	0.640674187756305	1180.76252803487	1	0.003016	0.000266	0	0.003282	0.001394052	0.000464684	0	0.001858736	36.45	36.4500007629395	36.45	100	100	100	99.92	99.9199981689453	99.92	PASS
LAMA2	4	0.001858736	4	2152	44	0.0013014497	64598	84	0.514202322140245	0.371488059539991	684.652493732203	1	0.002099	0.000393	0	0.002492	0.002788108	0	0	0.002788108	35.51	35.5099983215332	35.51	100	100	100	99.37	99.370002746582	99.37	PASS
LAMA3	1	0.000464684	1	2152	12	0.0002322964	64598	15	1.00028317458943	0.408085717019449	752.101976466845	1	0.000524	0.002626	0.000131	0.003281	0.004182154	0	0	0.004182154	36.52	36.5200004577637	36.52	100	100	100	99.54	99.5400009155274	99.54	PASS
LAMB1	0	0	0	0	0	0	0	0	0	0	0	1	0.000131	0.000262	0	0.000393	0.00464684	0	0	0.00464684	37.59	37.5900001525879	37.59	100	100	100	99.95	99.9499969482422	99.95	PASS
LAMB2	0	0	0	2152	9	0.0001858739	64598	12	0	1	1843	1	0.000131	0	0	0.000131	0.007899624	0	0	0.007899624	41.36	41.3600006103516	41.36	100	100	100	99.97	99.9700012207031	99.97	PASS
LAMB3	2	0.000929368	2	2152	22	0.0017192267	64598	111	-0.887437917510587	0.590883792000468	1088.99882865686	1	0.001948	0	0	0.001948	0.00185874	0	0	0.00185874	37.39	37.3899993896484	37.39	100	100	100	100	100	100	PASS
LAMC2	0	0	0	2152	6	0.0001402988	64598	9	0	1	1843	1	0.000131	0	0	0.000131	0.00185874	0	0	0.00185874	34.72	34.7200012207031	34.72	100	100	100	99.73	99.7300033569336	99.73	PASS
LAMC3	0	0	0	2152	3	0.0000774412	64598	5	0	1	1843	1	0.000918	0	0	0.000918	0.001858736	0	0	0.001858736	41.39	41.3899993896484	41.39	100	100	100	100	100	100	PASS
LARGE1	0	0	0	2152	1	0.0000154866	64598	1	0	1	1843	1	0.012866	0.001836	0	0.014702	0.009758368	0	0	0.009758368	33.78	33.7799987792969	33.78	100	100	100	99.44	99.4400024414062	99.44	PASS
LARP7	1	0.000932836	2	2152	4	0.0002637095	64598	17	1.82267392159873	0.123859333520701	228.272751678652	1	0.000131	0	0	0.000131	0.00139405	0	0	0.00139405	36.17	36.1699981689453	36.17	100	100	100	100	100	100	PASS
LARS1	0	0	0	2152	2	0.0000309809	64598	2	0	1	1843	1	0.000131	0	0	0.000131	0.007434944	0	0	0.007434944	36.15	36.2350006103516	36.32	100	100	100	100	100	100	PASS
LARS2	0	0	0	2152	7	0.0004955155	64598	32	0	0.626368259711495	1154.39670264828	1	0.009839	0	0	0.009839	0.021840144	0.000929368	0	0.022769512	37.55	37.5499992370606	37.55	100	100	100	99.52	99.5199966430664	99.52	PASS
LAT	0	0	0	0	0	0	0	0	0	0	0	1	0	0	0	0	0	0	0	0	39.3	39.2999992370606	39.3	100	100	100	99.46	99.4599990844727	99.46	PASS
LBR	0	0	0	2152	5	0.0000929891	64598	6	0	1	1843	1	0	0	0	0	0	0	0	0	35.53	35.5299987792969	35.53	100	100	100	100	100	100	PASS
LCA5	0	0	0	2152	7	0.0001239954	64598	8	0	1	1843	1	0	0	0	0	0	0	0	0	35.24	35.2400016784668	35.24	100	100	100	99.23	99.2300033569336	99.23	PASS
LCAT	0	0	0	2152	6	0.0002788388	64598	18	0	1	1843	1	0.000131	0	0	0.000131	0.008829	0	0	0.008829	39.92	39.9199981689453	39.92	100	100	100	100	100	100	PASS
LCT	0	0	0	2152	1	0.0000154909	64598	1	0	1	1843	1	0.002494	0.002623	0	0.005117	0.004182158	0	0	0.004182158	37.1	37.0999984741211	37.1	100	100	100	99.97	99.9700012207031	99.97	PASS
LDHA	0	0	0	0	0	0	0	0	0	0	0	1	0.000262	0	0	0.000262	0	0	0	0	34.13	34.1300010681152	34.13	100	100	100	100	100	100	PASS
LDHD	0	0	0	2152	1	0.000216806	64598	14	0	1	1843	1	0	0	0	0	0.008829	0	0	0.008829	43.16	43.1599998474121	43.16	100	100	100	100	100	100	PASS
LDLRAP1	0	0	0	2152	7	0.0001242023	64598	8	0	1	1843	1	0	0	0	0	0	0	0	0	37.53	37.5299987792969	37.53	100	100	100	100	100	100	PASS
LEMD2	0	0	0	0	0	0	0	0	0	0	0	1	0.000262	0	0	0.000262	0.000464684	0	0	0.000464684	41.49	41.4900016784668	41.49	100	100	100	99.46	99.4599990844727	99.46	PASS
LEPR	1	0.00139405	3	2152	1	0.00054193	64598	35	1.3631038881415	0.123104876824637	226.882287987807	1	0.000131	0.000131	0	0.000262	0.000464684	0	0	0.000464684	35.97	35.9700012207031	35.97	100	100	100	100	100	100	PASS
LFNG	0	0	0	0	0	0	0	0	0	0	0	1	0	0	0	0	0.000464684	0	0	0.000464684	38.09	38.0900001525879	38.09	100	100	100	98.4	98.4000015258789	98.4	PASS
LGI4	0	0	0	2152	4	0.000170372	64598	11	0	1	1843	1	0	0	0	0	0.000464684	0	0	0.000464684	40.08	40.0800018310547	40.08	100	100	100	98.72	98.7200012207031	98.72	PASS
LHB	0	0	0	0	0	0	0	0	0	0	0	1	0	0	0	0	0.000464684	0	0	0.000464684	40.04	40.0400009155273	40.04	100	100	100	100	100	100	PASS
LHCGR	0	0	0	2152	4	0.0001858747	64598	12	0	1	1843	1	0.000262	0	0	0.000262	0	0	0	0	35.49	35.4900016784668	35.49	100	100	100	100	100	100	PASS
LHFPL5	0	0	0	2152	1	0.000123908	64598	8	0	1	1843	1	0	0	0	0	0.000464684	0	0	0.000464684	36.52	36.5200004577637	36.52	100	100	100	99.81	99.8099975585938	99.81	PASS
LHX3	0	0	0	0	0	0	0	0	0	0	0	1	0.000524	0	0	0.000524	0	0	0	0	40.6	40.5999984741211	40.6	100	100	100	100	100	100	PASS
LIAS	0	0	0	2152	3	0.0000619675	64598	4	0	1	1843	1	0	0	0	0	0.002323418	0	0	0.002323418	36.65	36.6500015258789	36.65	100	100	100	100	100	100	PASS
LIFR	0	0	0	2152	6	0.0001084406	64598	7	0	1	1843	1	0.001836	0	0	0.001836	0.01347584	0	0	0.01347584	37.88	37.8800010681152	37.88	100	100	100	99.95	99.9499969482422	99.95	PASS
LIG4	0	0	0	2152	8	0.000604022	64598	39	0	0.637984670785712	1175.80574825807	1	0.000131	0	0	0.000131	0	0	0	0	31.82	31.8199996948242	31.82	100	100	100	99.45	99.4499969482422	99.45	PASS
LIM2	0	0	0	2152	1	0.0000154899	64598	1	0	1	1843	1	0	0	0	0	0.000464684	0	0	0.000464684	32.57	32.5699996948242	32.57	100	100	100	100	100	100	PASS
LIMS2	0	0	0	0	0	0	0	0	0	0	0	1	0.000262	0	0	0.000262	0.005111526	0	0	0.005111526	41.36	41.3600006103516	41.36	100	100	100	100	100	100	PASS
LINGO1	0	0	0	0	0	0	0	0	0	0	0	1	0.000133	0	0	0.000133	0	0	0	0	42.58	42.5800018310547	42.58	100	100	100	100	100	100	PASS
LINS1	0	0	0	2152	4	0.0000929214	64598	6	0	1	1843	1	0	0	0	0	0	0	0	0	36.22	36.2200012207031	36.22	100	100	100	98.61	98.6100006103516	98.61	PASS
LIPA	0	0	0	2152	16	0.000402712	64598	26	0	1	1843	1	0	0	0	0	0.000929368	0	0	0.000929368	38.22	38.2200012207031	38.22	100	100	100	100	100	100	PASS
LIPC	0	0	0	2152	1	0.0000154933	64598	1	0	1	1843	1	0.000262	0.000131	0	0.000393	0	0	0	0	38.36	38.3600006103516	38.36	100	100	100	100	100	100	PASS
LIPE	1	0.000464684	1	2152	2	0.0000774272	64598	5	2.58533759480144	0.178507578700088	328.989467544262	1	0	0.003336	0	0.003336	0.000464684	0	0	0.000464684	39.62	39.6199989318848	39.62	100	100	100	100	100	100	PASS
LIPH	0	0	0	2152	2	0.0001858234	64598	12	0	1	1843	1	0	0	0	0	0.004646844	0.000929368	0	0.005576212	41.63	41.6300010681152	41.63	100	100	100	100	100	100	PASS
LIPN	0	0	0	2152	3	0.0001550609	64598	10	0	1	1843	1	0.000524	0	0	0.000524	0.000464684	0	0	0.000464684	37.07	37.0699996948242	37.07	100	100	100	100	100	100	PASS
LIPT1	1	0.000464684	1	2152	4	0.0022766781	64598	147	-2.29260844699637	0.0972824004485851	179.291464026742	1	0	0	0	0	0.001858736	0	0	0.001858736	36.86	36.8600006103516	36.86	100	100	100	100	100	100	PASS
LIPT2	0	0	0	2152	3	0.0004646857	64598	30	0	1	1843	1	0	0	0	0	0	0	0	0	37.85	37.8499984741211	37.85	100	100	100	100	100	100	PASS
LMAN1	0	0	0	2152	1	0.0000154866	64598	1	0	1	1843	1	0.000131	0	0	0.000131	0.000464684	0	0	0.000464684	37.01	37.0099983215332	37.01	100	100	100	100	100	100	PASS
LMAN2L	0	0	0	0	0	0	0	0	0	0	0	1	0.00015	0.002673	0	0.002823	0.001858736	0.000929368	0	0.002788104	36.9	36.9000015258789	36.9	100	100	100	100	100	100	PASS
LMBR1	0	0	0	0	0	0	0	0	0	0	0	1	0.001314	0	0	0.001314	0	0	0	0	37.31	37.310001373291	37.31	100	100	100	100	100	100	PASS
LMBRD1	1	0.000929368	2	2152	3	0.0011804469	64598	76	-0.345011270388324	1	1843	1	0	0	0	0	0	0	0	0	36.49	36.4900016784668	36.49	100	100	100	100	100	100	PASS
LMF1	0	0	0	2152	2	0.0000309707	64598	2	0	1	1843	1	0.001049	0.000262	0	0.001311	0.013011148	0	0	0.013011148	40.69	40.689998626709	40.69	100	100	100	100	100	100	PASS
LMNA	0	0	0	2152	15	0.0002477663	64598	16	0	1	1843	1	0	0	0	0	0	0	0	0	41.7	41.7000007629395	41.7	100	100	100	100	100	100	PASS
LMNB2	0	0	0	0	0	0	0	0	0	0	0	1	0	0	0	0	0.00836431	0	0	0.00836431	43.5	43.5	43.5	100	100	100	100	100	100	PASS
LMOD3	1	0.000464684	1	2152	2	0.0000619684	64598	4	2.9066453467487	0.151138487767055	278.548232954682	1	0	0	0	0	0.007899624	0	0	0.007899624	32.61	32.6100006103516	32.61	100	100	100	100	100	100	PASS
LNPK	0	0	0	2152	1	0.0000155125	64598	1	0	1	1843	1	0.000131	0	0	0.000131	0.00325279	0	0	0.00325279	35.48	35.4799995422363	35.48	100	100	100	100	100	100	PASS
LONP1	0	0	0	2152	1	0.0000309741	64598	2	0	1	1843	1	0.000656	0	0	0.000656	0.008828994	0	0	0.008828994	44.64	44.6399993896484	44.64	100	100	100	100	100	100	PASS
LOXHD1	2	0.001858734	4	2152	26	0.0019707761	64598	127	-0.0844435574160629	1	1843	1	0.006431	0	0	0.006431	0.000929368	0.000464684	0	0.001394052	37.44	37.439998626709	37.44	100	100	100	100	100	100	PASS
LPAR6	0	0	0	0	0	0	0	0	0	0	0	1	0	0	0	0	0.000929368	0	0	0.000929368	31.62	31.6200008392334	31.62	100	100	100	99.68	99.6800003051758	99.68	PASS
LPIN1	0	0	0	2152	3	0.0000774315	64598	5	0	1	1843	1	0	0.000787	0	0.000787	0.00185874	0	0	0.00185874	37.57	37.5699996948242	37.57	100	100	100	99.51	99.5100021362305	99.51	PASS
LPL	1	0.000464684	1	2152	11	0.0005265358	64598	34	-0.180281654871879	1	1843	1	0	0	0	0	0	0.000929368	0	0.000929368	36.91	36.9099998474121	36.91	100	100	100	99.97	99.9700012207031	99.97	PASS
LRAT	0	0	0	2152	3	0.0000619521	64598	4	0	1	1843	1	0	0	0	0	0.00139405	0	0	0.00139405	39.58	39.5800018310547	39.58	100	100	100	99.53	99.5299987792969	99.53	PASS
LRBA	0	0	0	2152	7	0.0001241155	64598	8	0	1	1843	1	0.004612	0.001314	0	0.005926	0.002788102	0.000929368	0	0.00371747	34.44	34.439998626709	34.44	100	100	100	99.15	99.1500015258789	99.15	PASS
LRIG2	0	0	0	2152	2	0.0000309837	64598	2	0	1	1843	1	0.000131	0	0	0.000131	0.000464684	0	0	0.000464684	36.08	36.0800018310547	36.08	100	100	100	100	100	100	PASS
LRIT3	0	0	0	2152	3	0.0000774295	64598	5	0	1	1843	1	0	0	0	0	0.00139405	0	0	0.00139405	36.23	36.2299995422363	36.23	100	100	100	100	100	100	PASS
LRMDA	0	0	0	2152	3	0.0004335558	64598	28	0	1	1843	1	0.011317	0.001574	0	0.012891	0.003252788	0	0	0.003252788	35.19	35.189998626709	35.19	100	100	100	100	100	100	PASS
LRP1	0	0	0	0	0	0	0	0	0	0	0	1	0.004085	0.000131	0	0.004216	0.00557621	0	0	0.00557621	41.16	41.1599998474121	41.16	100	100	100	100	100	100	PASS
LRP2	0	0	0	2152	6	0.0001704638	64598	11	0	1	1843	1	0.000655	0	0	0.000655	0.00325279	0	0	0.00325279	35.05	35.0499992370606	35.05	100	100	100	99.56	99.5599975585938	99.56	PASS
LRP4	0	0	0	2152	1	0.0000309684	64598	2	0	1	1843	1	0.000262	0	0	0.000262	0	0	0	0	37.04	37.0400009155273	37.04	100	100	100	100	100	100	PASS
LRP5	0	0	0	2152	12	0.0003253504	64598	21	0	1	1843	1	0.002758	0	0	0.002758	0.000929368	0	0	0.000929368	42.21	42.2099990844727	42.21	100	100	100	99.5	99.5	99.5	PASS
LRPAP1	0	0	0	0	0	0	0	0	0	0	0	1	0	0	0	0	0	0	0	0	37.17	37.1699981689453	37.17	97.25	97.25	97.25	95.35	95.3499984741211	95.35	PASS
LRPPRC	0	0	0	2152	7	0.0001084349	64598	7	0	1	1843	1	0	0.000131	0	0.000131	0	0	0	0	36.16	36.1599998474121	36.16	100	100	100	99.95	99.9499969482422	99.95	PASS
LRRC32	0	0	0	0	0	0	0	0	0	0	0	1	0.000131	0	0	0.000131	0	0	0	0	38.54	38.5400009155273	38.54	100	100	100	100	100	100	PASS
LRRC56	0	0	0	2152	1	0.000061954	64598	4	0	1	1843	1	0	0	0	0	0	0	0	0	42.01	42.0099983215332	42.01	100	100	100	100	100	100	PASS
LRTOMT	0	0	0	2152	2	0.000046465	64598	3	0	1	1843	1	0	0	0	0	0	0	0	0	36.15	39.185001373291	42.22	100	100	100	99.47	99.5400009155274	99.61	PASS
LSS	0	0	0	2152	2	0.0000620011	64598	4	0	1	1843	1	0.000538	0	0	0.000538	0	0	0	0	38.2	38.2000007629395	38.2	100	100	100	97.58	97.5800018310547	97.58	PASS
LTBP2	1	0.000929368	2	2152	4	0.0001858388	64598	12	2.32219822732077	0.0731543166242109	134.823405538421	1	0	0.002018	0	0.002018	0.00743494	0	0	0.00743494	40.67	40.6699981689453	40.67	100	100	100	99.96	99.9599990844727	99.96	PASS
LTBP3	0	0	0	2152	2	0.0000627087	64598	4	0	1	1843	1	0	0	0	0	0	0	0	0	40.13	40.1300010681152	40.13	100	100	100	99.06	99.0599975585938	99.06	PASS
LTBP4	0	0	0	2152	1	0.000170316	64598	11	0	1	1843	1	0	0	0	0	0.000464684	0.000464684	0	0.000929368	41.88	41.8800010681152	41.88	100	100	100	100	100	100	PASS
LTC4S	1	0.000464684	1	2152	1	0.00312887	64598	202	-2.75131984200315	0.0250255322012551	46.1220558469132	0.554215410993867	0.000145	0	0	0.000145	0	0	0	0	43.1	43.0999984741211	43.1	100	100	100	100	100	100	PASS
LYRM4	0	0	0	0	0	0	0	0	0	0	0	1	0.000524	0.000131	0	0.000655	0.001394052	0	0	0.001394052	39.81	39.810001373291	39.81	100	100	100	100	100	100	PASS
LYRM7	0	0	0	0	0	0	0	0	0	0	0	1	0	0	0	0	0.00697026	0	0	0.00697026	35.82	35.8199996948242	35.82	100	100	100	99.31	99.3099975585938	99.31	PASS
LYST	0	0	0	2152	4	0.0000774886	64598	5	0	1	1843	1	0.003823	0	0	0.003823	0	0	0	0	36.14	36.1399993896484	36.14	100	100	100	99.78	99.7799987792969	99.78	PASS
LZTFL1	0	0	0	2152	2	0.0000309755	64598	2	0	1	1843	1	0.000131	0	0	0.000131	0.007899624	0	0	0.007899624	37.18	37.1800003051758	37.18	100	100	100	100	100	100	PASS
LZTR1	1	0.000464684	1	2152	19	0.0005886236	64598	38	-0.341095415353205	1	1843	1	0.000131	0.000669	0	0.0008	0	0	0	0	42.69	42.689998626709	42.69	100	100	100	100	100	100	PASS
M1AP	1	0.00604089	13	2152	1	0.00399529	64598	258	0.59646089078649	0.163109348613747	300.610529495136	1	0	0	0	0	0.000929368	0	0	0.000929368	34.48	34.4799995422363	34.48	100	100	100	99.61	99.6100006103516	99.61	PASS
MAD2L2	0	0	0	0	0	0	0	0	0	0	0	1	0.00223	0	0	0.00223	0	0	0	0	41.5	41.5	41.5	100	100	100	100	100	100	PASS
MADD	1	0.000464684	1	2152	1	0.000170331	64598	11	1.44790894346597	0.325162328663997	599.274171727747	1	0	0.000131	0	0.000131	0	0	0	0	38.87	38.8699989318848	38.87	100	100	100	99.67	99.6699981689453	99.67	PASS
MAG	0	0	0	0	0	0	0	0	0	0	0	1	0.000262	0	0	0.000262	0.000464684	0	0	0.000464684	41.7	41.7000007629395	41.7	100	100	100	100	100	100	PASS
MAGI2	0	0	0	0	0	0	0	0	0	0	0	1	0.011416	0.001444	0	0.01286	0.014405208	0.001394052	0.000929368	0.016728628	35.04	35.0400009155273	35.04	100	100	100	98.28	98.2799987792969	98.28	PASS
MAK	0	0	0	2152	5	0.000232352	64598	15	0	1	1843	1	0	0.000131	0	0.000131	0.000464684	0	0	0.000464684	35.36	35.3600006103516	35.36	100	100	100	99.97	99.9700012207031	99.97	PASS
MALT1	0	0	0	2152	1	0.0000309847	64598	2	0	1	1843	1	0.000143	0.000525	0	0.000668	0	0	0	0	37.13	37.1300010681152	37.13	100	100	100	100	100	100	PASS
MAN1B1	0	0	0	2152	7	0.0001239104	64598	8	0	1	1843	1	0	0	0	0	0.001858734	0	0	0.001858734	46.53	46.5299987792969	46.53	100	100	100	100	100	100	PASS
MAN2B1	0	0	0	2152	16	0.0009396294	64598	61	0	0.269118752274867	495.98586044258	1	0.000269	0.000131	0	0.0004	0.00836431	0	0	0.00836431	38.61	38.6100006103516	38.61	100	100	100	99.88	99.879997253418	99.88	PASS
MANBA	0	0	0	2152	7	0.0001549894	64598	10	0	1	1843	1	0.00643	0	0	0.00643	0.00139405	0	0	0.00139405	39.72	39.7200012207031	39.72	100	100	100	100	100	100	PASS
MAP3K20	0	0	0	2152	1	0.0000154847	64598	1	0	1	1843	1	0.000658	0.000262	0	0.00092	0.004182158	0	0	0.004182158	38.65	38.6500015258789	38.65	100	100	100	100	100	100	PASS
MAPKBP1	0	0	0	2152	1	0.0000154847	64598	1	0	1	1843	1	0.000131	0	0	0.000131	0.000464684	0	0	0.000464684	39.31	39.310001373291	39.31	100	100	100	99.99	99.9899978637695	99.99	PASS
MAPT	0	0	0	2152	2	0.0000309703	64598	2	0	1	1843	1	0.004199	0.00484	0	0.009039	0	0	0	0	39.97	39.9700012207031	39.97	100	100	100	99	99	99	PASS
MARK3	0	0	0	0	0	0	0	0	0	0	0	1	0.000533	0.000263	0	0.000796	0	0	0	0	37.66	37.6599998474121	37.66	100	100	100	100	100	100	PASS
MARS1	0	0	0	2152	2	0.0000309737	64598	2	0	1	1843	1	0	0	0	0	0.00557621	0	0	0.00557621	33.73	33.7299995422363	33.73	100	100	100	100	100	100	PASS
MARS2	0	0	0	2152	3	0.0000619382	64598	4	0	1	1843	1	0	0	0	0	0	0	0	0	43.6	43.5999984741211	43.6	100	100	100	100	100	100	PASS
MARVELD2	1	0.000464684	1	2152	3	0.0002324092	64598	15	0.999582791362676	0.408085717019449	752.101976466845	1	0	0	0	0	0.00929368	0	0	0.00929368	38.28	38.2799987792969	38.28	100	100	100	99.72	99.7200012207031	99.72	PASS
MASP1	1	0.00557621	12	2152	3	0.0005730213	64598	37	3.28262422203089	0.0000000372869068507125	0.0000687197693258631	0.0000137439538651726	0	0	0	0	0.000464684	0	0	0.000464684	37.84	37.8400001525879	37.84	100	100	100	100	100	100	PASS
MASP2	0	0	0	0	0	0	0	0	0	0	0	1	0	0	0	0	0	0	0.00139405	0.00139405	40.72	40.7200012207031	40.72	100	100	100	100	100	100	PASS
MATN3	0	0	0	0	0	0	0	0	0	0	0	1	0.000131	0	0	0.000131	0	0	0	0	39.16	39.1599998474121	39.16	100	100	100	99.73	99.7300033569336	99.73	PASS
MBOAT7	0	0	0	2152	1	0.0000154847	64598	1	0	1	1843	1	0.001443	0	0	0.001443	0	0	0	0	46.48	46.4799995422363	46.48	100	100	100	100	100	100	PASS
MBTPS1	0	0	0	2152	1	0.0000309761	64598	2	0	1	1843	1	0	0	0	0	0.008829	0	0	0.008829	36.79	36.7900009155273	36.79	100	100	100	100	100	100	PASS
MC1R	0	0	0	2152	1	0.0000309703	64598	2	0	1	1843	1	0.000131	0	0	0.000131	0	0	0	0	41.3	41.2999992370605	41.3	100	100	100	100	100	100	PASS
MC2R	1	0.000929368	2	2152	4	0.0006039875	64598	39	0.621731278684541	0.382770119253971	705.445329785069	1	0	0	0	0	0	0	0	0	37.04	37.0400009155273	37.04	100	100	100	99.86	99.8600006103516	99.86	PASS
MCCC1	1	0.0027881	6	2152	12	0.0005729791	64598	37	2.28272788559823	0.00244606214286472	4.50809252929967	0.104839361146504	0	0	0	0	0.004646844	0	0	0.004646844	34.01	34.0099983215332	34.01	100	100	100	94.46	94.4599990844727	94.46	PASS
MCCC2	1	0.000464684	1	2152	11	0.0009912614	64598	64	-1.09301558179724	0.725578510502707	1337.24119485649	1	0.000537	0	0	0.000537	0.00929368	0	0	0.00929368	35.61	35.6100006103516	35.61	100	100	100	98.86	98.8600006103516	98.86	PASS
MCEE	0	0	0	2152	2	0.000728075	64598	47	0	0.40711540692607	750.313694964746	1	0	0	0	0	0.001858736	0	0	0.001858736	31.63	31.6299991607666	31.63	100	100	100	94.94	94.9400024414063	94.94	PASS
MCIDAS	0	0	0	0	0	0	0	0	0	0	0	1	0	0	0	0	0.00929368	0	0	0.00929368	44.87	44.8699989318848	44.87	100	100	100	100	100	100	PASS
MCM3AP	0	0	0	2152	3	0.0002322506	64598	15	0	1	1843	1	0.000131	0.000393	0	0.000524	0	0	0	0	38.44	38.439998626709	38.44	100	100	100	99.42	99.4199981689453	99.42	PASS
MCM4	0	0	0	0	0	0	0	0	0	0	0	1	0.000131	0	0	0.000131	0.003717468	0	0	0.003717468	39.38	39.3800010681152	39.38	100	100	100	100	100	100	PASS
MCM5	0	0	0	0	0	0	0	0	0	0	0	1	0	0	0	0	0	0	0	0	36.63	36.6300010681152	36.63	100	100	100	100	100	100	PASS
MCM8	0	0	0	2152	5	0.0002013597	64598	13	0	1	1843	1	0	0	0	0	0	0	0	0	35.78	35.7799987792969	35.78	100	100	100	100	100	100	PASS
MCM9	0	0	0	2152	1	0.0000154875	64598	1	0	1	1843	1	0.000132	0	0	0.000132	0.000464684	0	0	0.000464684	34.55	34.5499992370605	34.55	100	100	100	99.92	99.9199981689453	99.92	PASS
MCOLN1	1	0.000464684	1	2152	12	0.0003717111	64598	24	0.322068200367433	0.559313230855569	1030.81428446681	1	0	0	0	0	0.00836431	0	0	0.00836431	44.5	44.5	44.5	100	100	100	100	100	100	PASS
MCPH1	0	0	0	2152	6	0.0003564288	64598	23	0	1	1843	1	0.001454	0.000131	0	0.001585	0.000929368	0	0	0.000929368	36.88	36.8800010681152	36.88	100	100	100	100	100	100	PASS
MDH1	0	0	0	0	0	0	0	0	0	0	0	1	0.000131	0	0	0.000131	0	0	0	0	37.09	37.0900001525879	37.09	100	100	100	100	100	100	PASS
MDH2	0	0	0	2152	1	0.0000619329	64598	4	0	1	1843	1	0.000131	0	0	0.000131	0.00464684	0	0	0.00464684	41.97	41.9700012207031	41.97	100	100	100	100	100	100	PASS
MDM2	0	0	0	0	0	0	0	0	0	0	0	1	0.000131	0	0	0.000131	0.006040894	0	0	0.006040894	34.08	34.0800018310547	34.08	100	100	100	97.88	97.879997253418	97.88	PASS
MECR	0	0	0	2152	2	0.0000929109	64598	6	0	1	1843	1	0	0	0	0	0	0	0	0	38.15	38.1500015258789	38.15	100	100	100	100	100	100	PASS
MED17	0	0	0	2152	5	0.0001858467	64598	12	0	1	1843	1	0.000393	0	0	0.000393	0	0	0	0	38.42	38.4199981689453	38.42	100	100	100	100	100	100	PASS
MED23	0	0	0	2152	4	0.0000929425	64598	6	0	1	1843	1	0	0	0	0	0.000464684	0	0	0.000464684	34.9	34.9000015258789	34.9	100	100	100	99.92	99.9199981689453	99.92	PASS
MED25	0	0	0	2152	2	0.0000464973	64598	3	0	1	1843	1	0	0	0	0	0.000464684	0	0	0.000464684	38.31	38.310001373291	38.31	100	100	100	100	100	100	PASS
MEFV	1	0.000464684	1	2152	3	0.0008365423	64598	54	-0.848188521567714	1	1843	1	0	0	0	0	0	0	0	0	40.64	40.6399993896484	40.64	100	100	100	100	100	100	PASS
MEGF10	0	0	0	2152	5	0.000139364	64598	9	0	1	1843	1	0.000397	0.000131	0	0.000528	0.01022305	0	0	0.01022305	35.7	35.7000007629395	35.7	100	100	100	99.96	99.9599990844727	99.96	PASS
MEGF8	0	0	0	2152	1	0.0000154899	64598	1	0	1	1843	1	0	0.000791	0	0.000791	0.000464684	0	0	0.000464684	40.09	40.0900001525879	40.09	100	100	100	98.75	98.75	98.75	PASS
MEI1	0	0	0	2152	1	0.0000464583	64598	3	0	1	1843	1	0	0	0	0	0.001394052	0	0	0.001394052	35.85	35.8499984741211	35.85	100	100	100	99.63	99.629997253418	99.63	PASS
MEIOB	0	0	0	0	0	0	0	0	0	0	0	1	0.000403	0	0	0.000403	0.000464684	0	0	0.000464684	39.37	39.3699989318848	39.37	100	100	100	100	100	100	PASS
MERTK	1	0.000464684	1	2152	9	0.0002943161	64598	19	0.658883506513475	0.480823708850821	886.158095412063	1	0.000262	0	0	0.000262	0.00557621	0	0	0.00557621	38.4	38.4000015258789	38.4	100	100	100	100	100	100	PASS
MESD	0	0	0	2152	1	0.0000154947	64598	1	0	1	1843	1	0	0	0	0	0	0	0	0	35.24	35.2400016784668	35.24	100	100	100	99.16	99.1600036621094	99.16	PASS
MESP2	0	0	0	2152	2	0.0000464521	64598	3	0	1	1843	1	0	0	0	0	0	0	0	0	40.19	40.189998626709	40.19	100	100	100	100	100	100	PASS
MET	0	0	0	2152	1	0.0000154895	64598	1	0	1	1843	1	0.000786	0	0	0.000786	0	0	0	0	38.68	38.6800003051758	38.68	100	100	100	100	100	100	PASS
METTL23	0	0	0	2152	3	0.00012391	64598	8	0	1	1843	1	0	0	0	0	0	0	0	0	36.68	36.6800003051758	36.68	100	100	100	100	100	100	PASS
METTL5	0	0	0	0	0	0	0	0	0	0	0	1	0.000134	0	0	0.000134	0.00325279	0	0	0.00325279	40.67	40.6699981689453	40.67	100	100	100	100	100	100	PASS
MFF	0	0	0	0	0	0	0	0	0	0	0	1	0.000656	0	0	0.000656	0.019516732	0	0	0.019516732	35.72	35.7200012207031	35.72	100	100	100	100	100	100	PASS
MFN2	0	0	0	2152	5	0.0006659517	64598	43	0	0.404930193891774	746.286347342539	1	0.003936	0	0	0.003936	0	0	0	0	36.89	36.8899993896484	36.89	100	100	100	100	100	100	PASS
MFRP	1	0.000464684	1	2152	16	0.000650661	64598	42	-0.485656111730948	1	1843	1	0.000262	0	0	0.000262	0	0	0	0	41.29	41.2900009155273	41.29	100	100	100	100	100	100	PASS
MFSD2A	0	0	0	2152	1	0.0000154895	64598	1	0	1	1843	1	0.000135	0	0	0.000135	0	0	0	0	39.14	39.1399993896484	39.14	100	100	100	100	100	100	PASS
MFSD8	2	0.000929368	2	2152	9	0.0002014962	64598	13	2.20549733948202	0.0826570463912132	152.336936499006	1	0.000262	0	0	0.000262	0.00139405	0	0	0.00139405	37.07	37.0699996948242	37.07	100	100	100	100	100	100	PASS
MGAT2	0	0	0	2152	2	0.0000464526	64598	3	0	1	1843	1	0.000262	0	0	0.000262	0.00743494	0	0	0.00743494	37.36	37.3600006103516	37.36	100	100	100	100	100	100	PASS
MGME1	0	0	0	0	0	0	0	0	0	0	0	1	0.000262	0	0	0.000262	0	0	0	0	32.84	32.8400001525879	32.84	100	100	100	91.39	91.3899993896484	91.39	PASS
MGP	1	0.000464684	1	2152	1	0.0000774641	64598	5	2.58465020373408	0.178507578700088	328.989467544262	1	0	0	0	0	0.00139405	0	0	0.00139405	36.47	36.4700012207031	36.47	100	100	100	100	100	100	PASS
MICOS13	0	0	0	2152	1	0.0000155304	64598	1	0	1	1843	1	0	0	0	0	0.00836431	0	0	0.00836431	41.37	41.9049987792969	42.44	100	100	100	100	100	100	PASS
MICU1	0	0	0	2152	6	0.0003407567	64598	22	0	1	1843	1	0.005248	0.002886	0	0.008134	0.001394052	0	0	0.001394052	36.27	36.2700004577637	36.27	100	100	100	99.15	99.1500015258789	99.15	PASS
MIEF2	0	0	0	0	0	0	0	0	0	0	0	1	0	0	0	0	0.000929368	0	0	0.000929368	43.66	43.6599998474121	43.66	100	100	100	100	100	100	PASS
MIPEP	1	0.000464684	1	2152	0	0	64598	0	0	0.0322397003745318	59.4177677902621	0.612554307116105	0.000917	0.00118	0	0.002097	0.001394052	0	0	0.001394052	36.23	36.2299995422363	36.23	100	100	100	100	100	100	PASS
MITF	0	0	0	2152	1	0.0000774234	64598	5	0	1	1843	1	0.002238	0.000787	0	0.003025	0.007899624	0	0	0.007899624	35.55	35.5499992370606	35.55	100	100	100	100	100	100	PASS
MKKS	0	0	0	2152	9	0.0003252292	64598	21	0	1	1843	1	0.000131	0	0	0.000131	0	0	0	0	35.07	35.0699996948242	35.07	100	100	100	100	100	100	PASS
MKS1	1	0.000464684	1	2152	5	0.0001394052	64598	9	1.73696559416621	0.279443124762769	515.013678937783	1	0.000131	0	0	0.000131	0.000464684	0	0	0.000464684	34.04	34.0400009155273	34.04	100	100	100	100	100	100	PASS
MLC1	1	0.000464684	1	2152	7	0.0001703367	64598	11	1.44786066555918	0.325162328663997	599.274171727747	1	0	0	0	0	0.001394052	0	0.000464684	0.001858736	38.77	38.7700004577637	38.77	100	100	100	100	100	100	PASS
MLH1	0	0	0	2152	2	0.0000309707	64598	2	0	1	1843	1	0.000393	0.009197	0	0.00959	0.009293674	0	0	0.009293674	33.87	33.8699989318848	33.87	100	100	100	96.06	96.0599975585938	96.06	PASS
MLPH	0	0	0	2152	1	0.0000154861	64598	1	0	1	1843	1	0.000131	0	0	0.000131	0.00743494	0	0	0.00743494	37.67	37.6699981689453	37.67	100	100	100	99.6	99.5999984741211	99.6	PASS
MLYCD	0	0	0	2152	3	0.0001241326	64598	8	0	1	1843	1	0	0	0	0	0.008829	0	0	0.008829	44.9	44.9000015258789	44.9	100	100	100	100	100	100	PASS
MMAA	0	0	0	2152	12	0.0007434489	64598	48	0	0.408495670180356	752.857520142396	1	0	0	0	0	0.00139405	0	0	0.00139405	37.31	37.310001373291	37.31	100	100	100	100	100	100	PASS
MMAB	0	0	0	2152	8	0.0005155069	64598	33	0	0.627114656566696	1155.77231205242	1	0	0	0	0	0	0	0	0	38.25	38.25	38.25	100	100	100	100	100	100	PASS
MMACHC	1	0.000464684	1	2152	18	0.0008362599	64598	54	-0.847701414265467	1	1843	1	0	0	0	0	0	0	0	0	30.35	30.3500003814697	30.35	100	100	100	95.89	95.8899993896484	95.89	PASS
MMADHC	0	0	0	2152	3	0.0000774478	64598	5	0	1	1843	1	0	0	0	0	0.004646842	0	0	0.004646842	35.35	35.3499984741211	35.35	100	100	100	100	100	100	PASS
MMP1	0	0	0	2152	5	0.0003252367	64598	21	0	1	1843	1	0	0	0	0	0	0	0	0	36.77	36.7700004577637	36.77	100	100	100	94.65	94.6500015258789	94.65	PASS
MMP13	0	0	0	2152	3	0.0002013458	64598	13	0	1	1843	1	0	0	0	0	0	0	0	0	38.8	38.7999992370606	38.8	100	100	100	100	100	100	PASS
MMP2	0	0	0	2152	1	0.0000154861	64598	1	0	1	1843	1	0.000393	0	0	0.000393	0.008829	0	0	0.008829	37.09	37.0900001525879	37.09	100	100	100	100	100	100	PASS
MMP20	0	0	0	2152	1	0.0000154875	64598	1	0	1	1843	1	0.000131	0.000131	0	0.000262	0	0	0	0	37.18	37.1800003051758	37.18	100	100	100	100	100	100	PASS
MMP21	0	0	0	2152	5	0.0008523405	64598	55	0	0.425933854604776	784.996094036602	1	0	0	0	0	0	0	0	0	39.26	39.2599983215332	39.26	100	100	100	100	100	100	PASS
MMUT	0	0	0	2152	33	0.001084376	64598	70	0	0.176173585500762	324.687918077904	1	0	0	0	0	0.000464684	0	0	0.000464684	35.21	35.2099990844727	35.21	100	100	100	99.74	99.7399978637695	99.74	PASS
MNS1	0	0	0	2152	1	0.000155087	64598	10	0	1	1843	1	0	0	0	0	0	0	0	0	33.58	33.5800018310547	33.58	100	100	100	99.65	99.6500015258789	99.65	PASS
MOCOS	0	0	0	2152	1	0.0000154856	64598	1	0	1	1843	1	0.000558	0	0	0.000558	0	0	0	0	36.01	36.0099983215332	36.01	100	100	100	100	100	100	PASS
MOCS1	1	0.000929368	2	2152	4	0.0002942531	64598	19	1.65919235647682	0.145961614274758	269.007255108379	1	0	0	0	0	0.000464684	0	0	0.000464684	36.56	36.560001373291	36.56	100	100	100	100	100	100	PASS
MOCS2	0	0	0	2152	2	0.0002168341	64598	14	0	1	1843	1	0	0	0	0	0.00929368	0	0	0.00929368	34.94	34.939998626709	34.94	100	100	100	99.71	99.7099990844727	99.71	PASS
MOGS	0	0	0	2152	6	0.0002013045	64598	13	0	1	1843	1	0.000131	0	0	0.000131	0.000929368	0	0	0.000929368	41.65	41.6500015258789	41.65	100	100	100	100	100	100	PASS
MPC1	0	0	0	0	0	0	0	0	0	0	0	1	0.000393	0	0	0.000393	0.00511152	0	0	0.00511152	37.62	37.6199989318848	37.62	100	100	100	100	100	100	PASS
MPDU1	1	0.000465116	1	2152	4	0.000123909	64598	8	1.90830958953286	0.255435346417997	470.767343448368	1	0	0	0	0	0	0	0	0	33.69	33.689998626709	33.69	100	100	100	99.38	99.379997253418	99.38	PASS
MPDZ	1	0.000464684	1	2152	6	0.0002632951	64598	17	0.819569298175915	0.445645893014975	821.3253808266	1	0.002886	0	0	0.002886	0.00185874	0	0	0.00185874	35.69	35.689998626709	35.69	100	100	100	99.84	99.8399963378906	99.84	PASS
MPI	0	0	0	2152	9	0.000449077	64598	29	0	1	1843	1	0	0	0	0	0	0	0	0	38	38	38	100	100	100	100	100	100	PASS
MPIG6B	0	0	0	2152	3	0.0000929425	64598	6	0	1	1843	1	0	0	0	0	0.000464684	0	0	0.000464684	37.38	37.3800010681152	37.38	100	100	100	100	100	100	PASS
MPL	1	0.000464684	1	2152	13	0.0009759254	64598	63	-1.07052090117942	0.7251612692587	1336.47221924378	1	0	0	0	0	0	0	0	0	35.34	35.3400001525879	35.34	100	100	100	99.34	99.3399963378906	99.34	PASS
MPLKIP	0	0	0	2152	2	0.0000464574	64598	3	0	1	1843	1	0	0	0	0	0.00464684	0	0	0.00464684	42.42	42.4199981689453	42.42	100	100	100	100	100	100	PASS
MPO	4	0.01580316	34	2152	8	0.0129199716	64598	835	0.290610169781311	0.245194597006957	451.893642283821	1	0	0	0	0	0.000464684	0	0	0.000464684	38.92	38.9199981689453	38.92	100	100	100	100	100	100	PASS
MPV17	0	0	0	2152	8	0.0003716752	64598	24	0	1	1843	1	0.000262	0	0	0.000262	0	0	0	0	39.49	39.4900016784668	39.49	100	100	100	100	100	100	PASS
MPZL2	2	0.004182158	9	2152	2	0.0011305156	64598	73	1.88726666731511	0.00130820554508659	2.41102281959459	0.0651627789079618	0	0	0	0	0	0	0	0	40.75	40.75	40.75	100	100	100	100	100	100	PASS
MRAP	0	0	0	2152	1	0.000139345	64598	9	0	1	1843	1	0	0	0	0	0	0	0	0	36.16	36.1599998474121	36.16	100	100	100	100	100	100	PASS
MRE11	0	0	0	2152	8	0.0002479385	64598	16	0	1	1843	1	0.000262	0	0	0.000262	0	0	0	0	37.52	37.5200004577637	37.52	100	100	100	99.9	99.9000015258789	99.9	PASS
MRM2	0	0	0	0	0	0	0	0	0	0	0	1	0	0	0	0	0	0	0	0	31.59	31.5900001525879	31.59	100	100	100	100	100	100	PASS
MRPL12	0	0	0	2152	1	0.000061954	64598	4	0	1	1843	1	0	0	0	0	0	0	0	0	46.62	46.6199989318848	46.62	100	100	100	100	100	100	PASS
MRPL3	0	0	0	2152	2	0.0000464617	64598	3	0	1	1843	1	0.000525	0	0	0.000525	0.012081784	0.000464684	0	0.012546468	40.09	40.0900001525879	40.09	100	100	100	100	100	100	PASS
MRPL44	0	0	0	2152	1	0.00026328	64598	17	0	1	1843	1	0.007216	0	0	0.007216	0	0	0	0	38	38	38	100	100	100	100	100	100	PASS
MRPS14	0	0	0	0	0	0	0	0	0	0	0	1	0.000262	0	0	0.000262	0.00185874	0	0	0.00185874	36.67	36.6699981689453	36.67	100	100	100	100	100	100	PASS
MRPS16	0	0	0	2152	2	0.0000464612	64598	3	0	1	1843	1	0	0	0	0	0.000464684	0	0	0.000464684	37.33	37.3300018310547	37.33	100	100	100	99.39	99.3899993896484	99.39	PASS
MRPS2	0	0	0	2152	2	0.0000464665	64598	3	0	1	1843	1	0	0	0	0	0	0	0	0	45.88	45.8800010681152	45.88	100	100	100	100	100	100	PASS
MRPS22	0	0	0	2152	4	0.0003562831	64598	23	0	1	1843	1	0	0	0	0	0.012081784	0	0	0.012081784	41.35	41.3499984741211	41.35	100	100	100	100	100	100	PASS
MRPS23	0	0	0	0	0	0	0	0	0	0	0	1	0	0	0	0	0.000464684	0	0	0.000464684	36.15	36.1500015258789	36.15	100	100	100	100	100	100	PASS
MRPS25	0	0	0	2152	1	0.0000154923	64598	1	0	1	1843	1	0	0	0	0	0	0	0	0	36.42	36.4199981689453	36.42	100	100	100	99.35	99.3499984741211	99.35	PASS
MRPS28	0	0	0	0	0	0	0	0	0	0	0	1	0.000545	0	0	0.000545	0.005111518	0.00743494	0	0.012546458	35.33	35.3300018310547	35.33	100	100	100	100	100	100	PASS
MRPS34	0	0	0	2152	2	0.0013512545	64598	87	0	0.119935107523202	221.040403165262	1	0	0	0	0	0	0	0	0	51.93	51.9300003051758	51.93	100	100	100	100	100	100	PASS
MRPS7	0	0	0	0	0	0	0	0	0	0	0	1	0.006708	0	0	0.006708	0	0	0	0	39.24	39.2400016784668	39.24	100	100	100	100	100	100	PASS
MRTFA	0	0	0	0	0	0	0	0	0	0	0	1	0.000131	0.003235	0	0.003366	0.000464684	0	0	0.000464684	38.77	38.8850002288818	39	100	100	100	100	100	100	PASS
MSH2	0	0	0	2152	2	0.0006702395	64598	43	0	0.404930193891774	746.286347342539	1	0	0	0	0	0	0	0	0	40.54	40.5400009155273	40.54	100	100	100	100	100	100	PASS
MSH3	3	0.001394052	3	2152	18	0.0005888618	64598	38	1.24328338392515	0.145254733947543	267.704474665321	1	0.002361	0.00118	0	0.003541	0.015334578	0	0	0.015334578	33.52	33.5200004577637	33.52	100	100	100	97.35	97.3499984741211	97.35	PASS
MSH5	0	0	0	0	0	0	0	0	0	0	0	1	0	0	0	0	0.000464684	0	0	0.000464684	38.71	38.7099990844727	38.71	100	100	100	99.96	99.9599990844727	99.96	PASS
MSH6	1	0.000464684	1	2152	30	0.0007130848	64598	46	-0.617823681249052	1	1843	1	0.001312	0	0	0.001312	0.000929368	0	0	0.000929368	37.39	37.3899993896484	37.39	100	100	100	100	100	100	PASS
MSMO1	0	0	0	0	0	0	0	0	0	0	0	1	0	0	0	0	0	0	0	0	35.22	35.2200012207031	35.22	100	100	100	100	100	100	PASS
MSRB3	0	0	0	0	0	0	0	0	0	0	0	1	0.000655	0	0	0.000655	0.00557621	0	0	0.00557621	37.68	37.6800003051758	37.68	100	100	100	100	100	100	PASS
MTFMT	2	0.004646838	10	2152	7	0.0013318778	64598	86	1.80278762890879	0.00108223644885459	1.99456177523902	0.0569874792925434	0	0.000131	0	0.000131	0.00232342	0	0	0.00232342	35.8	35.7999992370605	35.8	100	100	100	100	100	100	PASS
MTHFD1	0	0	0	0	0	0	0	0	0	0	0	1	0.000135	0	0	0.000135	0.007899624	0	0	0.007899624	38.19	38.189998626709	38.19	100	100	100	100	100	100	PASS
MTHFR	0	0	0	2152	20	0.0006970323	64598	45	0	0.405325979328576	747.015779902566	1	0.000131	0	0	0.000131	0	0	0	0	38.86	38.8600006103516	38.86	100	100	100	99.58	99.5800018310547	99.58	PASS
MTHFS	0	0	0	2152	2	0.0001238784	64598	8	0	1	1843	1	0.000262	0	0	0.000262	0.000929368	0	0	0.000929368	34.54	34.5400009155273	34.54	100	100	100	97.17	97.1699981689453	97.17	PASS
MTMR2	0	0	0	2152	4	0.000061955	64598	4	0	1	1843	1	0.000393	0.000131	0	0.000524	0.14823419	0	0	0.14823419	35.99	35.9900016784668	35.99	100	100	100	99.72	99.7200012207031	99.72	PASS
MTO1	1	0.00232342	5	2152	7	0.0006505358	64598	42	1.83654961282731	0.0173292498446499	31.9378074636898	0.449828274136476	0	0	0	0	0.000464684	0	0.000464684	0.000929368	34.3	34.2999992370606	34.3	100	100	100	98.02	98.0199966430664	98.02	PASS
MTPAP	0	0	0	2152	1	0.0000309703	64598	2	0	1	1843	1	0.000393	0	0	0.000393	0	0	0	0	34.92	34.9199981689453	34.92	100	100	100	98.77	98.7699966430664	98.77	PASS
MTR	0	0	0	2152	6	0.0002170949	64598	14	0	1	1843	1	0.000262	0.000131	0	0.000393	0	0	0	0	36.45	36.4500007629395	36.45	100	100	100	99.18	99.1800003051758	99.18	PASS
MTRFR	0	0	0	2152	3	0.0004491426	64598	29	0	0	0	NA	0	0	0	0	0	0	0	0	0	0	0	0	0	0	0	0	0	LOW_DP
MTRR	1	0.000464684	1	2152	10	0.0004182659	64598	27	0.151829586773009	0.600592233972006	1106.89148721041	1	0	0	0	0	0.000929368	0	0	0.000929368	36.2	36.2000007629395	36.2	100	100	100	96.79	96.7900009155274	96.79	PASS
MTTP	0	0	0	2152	9	0.0003253498	64598	21	0	1	1843	1	0	0	0	0	0.00139405	0	0	0.00139405	34.94	34.939998626709	34.94	100	100	100	100	100	100	PASS
MTX2	0	0	0	0	0	0	0	0	0	0	0	1	0.000655	0	0	0.000655	0.003717474	0	0	0.003717474	40.79	40.7900009155274	40.79	100	100	100	100	100	100	PASS
MUSK	0	0	0	2152	4	0.0001239436	64598	8	0	1	1843	1	0.000132	0	0	0.000132	0.000929368	0	0	0.000929368	36.47	36.4700012207031	36.47	100	100	100	100	100	100	PASS
MUTYH	4	0.003718336	8	2152	27	0.0085482395	64598	552	-1.20097018682019	0.011262978819393	20.7576699641414	0.349757571576956	0	0	0	0	0.000464684	0	0	0.000464684	41.87	41.8699989318848	41.87	100	100	100	100	100	100	PASS
MVK	0	0	0	2152	15	0.0006970853	64598	45	0	0.405325979328576	747.015779902566	1	0.000131	0.000656	0	0.000787	0	0	0	0	41.78	41.7799987792969	41.78	100	100	100	100	100	100	PASS
MYBPC1	0	0	0	2152	1	0.0000154837	64598	1	0	1	1843	1	0.000131	0	0	0.000131	0.00557621	0	0	0.00557621	36.51	36.5099983215332	36.51	100	100	100	98.62	98.620002746582	98.62	PASS
MYBPC3	0	0	0	2152	9	0.0002323517	64598	15	0	1	1843	1	0	0	0	0	0	0	0	0	41.07	41.0699996948242	41.07	100	100	100	100	100	100	PASS
MYD88	0	0	0	2152	1	0.000541963	64598	35	0	0.629605997875451	1160.36385408446	1	0	0	0	0	0.007899624	0	0	0.007899624	35.66	35.6599998474121	35.66	100	100	100	99.79	99.7900009155273	99.79	PASS
MYEF2	0	0	0	2152	3	0.00018609	64598	12	0	1	1843	1	0	0	0	0	0	0	0	0	36.17	36.1699981689453	36.17	100	100	100	99.98	99.9800033569336	99.98	PASS
MYF5	0	0	0	0	0	0	0	0	0	0	0	1	0.000262	0	0	0.000262	0.00557621	0	0	0.00557621	34.16	34.1599998474121	34.16	100	100	100	100	100	100	PASS
MYH3	0	0	0	2152	2	0.0000309737	64598	2	0	1	1843	1	0.000131	0	0	0.000131	0	0	0	0	38.12	38.1199989318848	38.12	100	100	100	98.53	98.5299987792969	98.53	PASS
MYH7	1	0.000464684	1	2152	29	0.0006814215	64598	44	-0.552297496792648	1	1843	1	0	0	0	0	0	0	0	0	36.32	36.3199996948242	36.32	100	100	100	99.5	99.5	99.5	PASS
MYL1	0	0	0	0	0	0	0	0	0	0	0	1	0	0	0	0	0.000464684	0	0	0.000464684	35.45	35.4500007629395	35.45	100	100	100	100	100	100	PASS
MYLK	0	0	0	2152	1	0.0000154851	64598	1	0	1	1843	1	0.000524	0	0	0.000524	0.012546468	0.000464684	0	0.013011152	36.1	36.0999984741211	36.1	100	100	100	99.14	99.1399993896484	99.14	PASS
MYMK	0	0	0	2152	2	0.0000309785	64598	2	0	1	1843	1	0.000262	0	0	0.000262	0.000464684	0	0	0.000464684	39.99	39.9900016784668	39.99	100	100	100	100	100	100	PASS
MYO15A	4	0.001858736	4	2152	27	0.0013016638	64598	84	0.513965005550744	0.371488059539991	684.652493732203	1	0.000666	0	0	0.000666	0.000929368	0	0	0.000929368	39.85	39.8499984741211	39.85	100	100	100	99.91	99.9100036621094	99.91	PASS
MYO18B	0	0	0	2152	2	0.000092944	64598	6	0	1	1843	1	0.025628	0.001056	0	0.026684	0.003717468	0	0	0.003717468	37.15	37.1500015258789	37.15	100	100	100	99.36	99.3600006103516	99.36	PASS
MYO1E	0	0	0	2152	2	0.0000309785	64598	2	0	1	1843	1	0.000393	0.000131	0	0.000524	0.000929368	0	0	0.000929368	34.24	34.2400016784668	34.24	100	100	100	98.57	98.5699996948242	98.57	PASS
MYO3A	1	0.000464684	1	2152	3	0.0002168823	64598	14	1.09933765292102	0.388362267551723	715.751659097826	1	0.000788	0	0	0.000788	0	0	0	0	36.8	36.7999992370606	36.8	100	100	100	98.84	98.8399963378906	98.84	PASS
MYO5A	0	0	0	2152	1	0.0000154899	64598	1	0	1	1843	1	0.000655	0.000262	0	0.000917	0	0	0	0	37.23	37.2299995422363	37.23	100	100	100	99.93	99.9300003051758	99.93	PASS
MYO5B	0	0	0	2152	7	0.0001858569	64598	12	0	1	1843	1	0.000524	0.000656	0	0.00118	0	0	0	0	38.15	38.1500015258789	38.15	100	100	100	99.25	99.25	99.25	PASS
MYO6	1	0.000464684	1	2152	6	0.0001559668	64598	10	1.57501100951382	0.302677143275063	557.833975055942	1	0.000131	0	0	0.000131	0	0	0	0	37.03	37.0299987792969	37.03	100	100	100	100	100	100	PASS
MYO7A	0	0	0	2152	62	0.0017038058	64598	110	0	0.0533184436727701	98.2658916889152	0.869609660963852	0	0.000393	0	0.000393	0	0.00697026	0	0.00697026	40.8	40.7999992370605	40.8	100	100	100	100	100	100	PASS
MYO9A	1	0.000929368	2	2152	2	0.00167281	64598	108	-0.847951715507465	0.589353765865759	1086.17899049059	1	0.000262	0.000131	0	0.000393	0.00232342	0	0	0.00232342	38.18	38.1800003051758	38.18	100	100	100	100	100	100	PASS
MYOD1	0	0	0	0	0	0	0	0	0	0	0	1	0	0	0	0	0	0	0	0	46.49	46.4900016784668	46.49	100	100	100	100	100	100	PASS
MYORG	0	0	0	2152	2	0.0000619559	64598	4	0	1	1843	1	0	0	0	0	0	0	0	0	40.06	40.060001373291	40.06	100	100	100	99.52	99.5199966430664	99.52	PASS
MYPN	0	0	0	2152	1	0.0000154851	64598	1	0	1	1843	1	0.010923	0	0	0.010923	0.004182154	0	0	0.004182154	38.06	38.060001373291	38.06	100	100	100	100	100	100	PASS
MYSM1	0	0	0	0	0	0	0	0	0	0	0	1	0.000262	0	0	0.000262	0	0	0	0	37.06	37.060001373291	37.06	100	100	100	99.87	99.870002746582	99.87	PASS
NADK2	0	0	0	2152	1	0.0000155424	64598	1	0	1	1843	1	0	0	0	0	0.009758364	0	0	0.009758364	39.42	39.4199981689453	39.42	100	100	100	100	100	100	PASS
NADSYN1	2	0.002323424	5	2152	3	0.0015950248	64598	103	0.542673598879817	0.402711498389539	742.197291531921	1	0.000131	0	0	0.000131	0	0	0	0	40.45	40.4500007629395	40.45	100	100	100	100	100	100	PASS
NAGA	2	0.0009298	2	2152	2	0.0000774444	64598	5	3.58568759915123	0.0195852764133734	36.0956644298471	0.487779249051988	0.000262	0	0	0.000262	0	0	0	0	37.42	37.4199981689453	37.42	100	100	100	99.3	99.3000030517578	99.3	PASS
NAGLU	2	0.000929368	2	2152	26	0.0012081481	64598	78	-0.378475441338959	1	1843	1	0	0	0	0	0	0	0	0	40.96	40.9599990844727	40.96	100	100	100	100	100	100	PASS
NAGS	0	0	0	2152	1	0.000092908	64598	6	0	1	1843	1	0	0	0	0	0	0	0	0	42.33	42.3300018310547	42.33	100	100	100	100	100	100	PASS
NALCN	0	0	0	2152	7	0.0001084266	64598	7	0	1	1843	1	0.010889	0.000131	0	0.01102	0.001394052	0	0	0.001394052	36.1	36.0999984741211	36.1	100	100	100	99.6	99.5999984741211	99.6	PASS
NANS	0	0	0	2152	1	0.0000155101	64598	1	0	1	1843	1	0.000262	0	0	0.000262	0.000464684	0	0	0.000464684	42.38	42.3800010681152	42.38	100	100	100	100	100	100	PASS
NARS1	0	0	0	2152	2	0.0015493642	64598	100	0	0.0808035388002847	148.920922008925	1	0	0	0	0	0	0	0	0	35.91	35.9099998474121	35.91	100	100	100	99.37	99.370002746582	99.37	PASS
NARS2	2	0.000929368	2	2152	6	0.0002633618	64598	17	1.81920386952686	0.123859333520701	228.272751678652	1	0.000131	0	0	0.000131	0	0	0	0	39.07	39.0699996948242	39.07	100	100	100	100	100	100	PASS
NAT2	0	0	0	0	0	0	0	0	0	0	0	1	0	0	0	0	0	0	0	0	35.21	35.2099990844727	35.21	100	100	100	100	100	100	PASS
NAT8L	0	0	0	0	0	0	0	0	0	0	0	1	0.000131	0	0	0.000131	0	0	0	0	43.91	43.9099998474121	43.91	100	100	100	100	100	100	PASS
NAXD	0	0	0	2152	2	0.0001393698	64598	9	0	1	1843	1	0	0	0	0	0	0	0	0	37.99	37.9900016784668	37.99	100	100	100	100	100	100	PASS
NAXE	0	0	0	2152	2	0.0000929161	64598	6	0	1	1843	1	0	0	0	0	0	0	0	0	38.8	38.7999992370606	38.8	100	100	100	100	100	100	PASS
NBAS	3	0.001858736	4	2152	13	0.0030975969	64598	200	-0.73682753797237	0.424725727060318	782.769514972165	1	0.000524	0.000656	0	0.00118	0.000464684	0.000929368	0	0.001394052	36.09	36.0900001525879	36.09	100	100	100	99.75	99.75	99.75	PASS
NBEAL2	0	0	0	0	0	0	0	0	0	0	0	1	0.000131	0	0	0.000131	0.007899624	0	0	0.007899624	41.16	41.1599998474121	41.16	100	100	100	99.65	99.6500015258789	99.65	PASS
NBN	0	0	0	2152	17	0.0004027382	64598	26	0	1	1843	1	0.000655	0.000262	0	0.000917	0.004182152	0	0	0.004182152	35.36	35.3600006103516	35.36	100	100	100	99.5	99.5	99.5	PASS
NCAPD2	1	0.000929368	2	2152	1	0.000402626	64598	26	1.20680963200024	0.227875157423976	419.973915132388	1	0.000141	0	0	0.000141	0.00139405	0	0	0.00139405	36.31	36.310001373291	36.31	100	100	100	99.83	99.8300018310547	99.83	PASS
NCAPD3	0	0	0	2152	1	0.0000464713	64598	3	0	1	1843	1	0.001049	0.000393	0	0.001442	0	0	0	0	38.65	38.6500015258789	38.65	100	100	100	100	100	100	PASS
NCAPG2	0	0	0	2152	1	0.0000464511	64598	3	0	1	1843	1	0.003017	0.000787	0	0.003804	0	0	0	0	36.35	36.3499984741211	36.35	100	100	100	100	100	100	PASS
NCAPH	0	0	0	0	0	0	0	0	0	0	0	1	0.000131	0	0	0.000131	0.00232342	0	0	0.00232342	36.72	36.7200012207031	36.72	100	100	100	99.57	99.5699996948242	99.57	PASS
NCF1	0	0	0	2152	2	0.0003690146	64598	24	0	0	0	NA	0	0	0	0	0.00464684	0	0	0.00464684	25.42	25.4200000762939	25.42	89.17	89.1699981689453	89.17	72.58	72.5800018310547	72.58	LOW_DP
NCF2	0	0	0	2152	5	0.0001238912	64598	8	0	1	1843	1	0	0	0	0	0.00185874	0	0	0.00185874	35.48	35.4799995422363	35.48	100	100	100	100	100	100	PASS
NCF4	1	0.00139405	3	2152	4	0.0003408031	64598	22	2.03227194314934	0.0453924781390692	83.6583372103045	0.774614233428745	0	0	0	0	0	0	0	0	34.42	34.4199981689453	34.42	100	100	100	100	100	100	PASS
NCKAP1L	0	0	0	2152	2	0.0000464723	64598	3	0	1	1843	1	0	0	0	0	0.006040894	0	0	0.006040894	32.08	32.0800018310547	32.08	100	100	100	99.85	99.8499984741211	99.85	PASS
NCR1	2	0.000929368	2	2152	5	0.0003252557	64598	21	1.51467563090218	0.168786641509713	311.073780302401	1	0	0	0	0	0	0	0	0	36.38	36.3800010681152	36.38	100	100	100	100	100	100	PASS
NDE1	1	0.000464684	1	2152	3	0.00010843	64598	7	2.09948599952886	0.230628052185011	425.047500176976	1	0.000131	0	0	0.000131	0	0	0	0	37.6	37.5999984741211	37.6	100	100	100	100	100	100	PASS
NDRG1	0	0	0	2152	1	0.0000154861	64598	1	0	1	1843	1	0	0	0.000131	0.000131	0.001394052	0	0	0.001394052	33.89	33.8899993896484	33.89	100	100	100	99.61	99.6100006103516	99.61	PASS
NDST1	0	0	0	2152	1	0.0000154899	64598	1	0	1	1843	1	0	0	0	0	0.007434944	0	0	0.007434944	36.87	36.8699989318848	36.87	100	100	100	98.66	98.6600036621094	98.66	PASS
NDUFA10	0	0	0	0	0	0	0	0	0	0	0	1	0.000657	0	0	0.000657	0.000464684	0	0	0.000464684	40.18	40.1800003051758	40.18	100	100	100	100	100	100	PASS
NDUFA11	0	0	0	0	0	0	0	0	0	0	0	1	0.000393	0	0	0.000393	0.00836431	0	0	0.00836431	40.44	40.439998626709	40.44	100	100	100	100	100	100	PASS
NDUFA12	0	0	0	2152	1	0.0000154895	64598	1	0	1	1843	1	0	0	0	0	0.00557621	0	0	0.00557621	33.25	33.25	33.25	100	100	100	100	100	100	PASS
NDUFA13	0	0	0	2152	1	0.0000154861	64598	1	0	1	1843	1	0	0	0	0	0.01022305	0	0	0.01022305	37.89	37.8899993896484	37.89	100	100	100	100	100	100	PASS
NDUFA2	0	0	0	0	0	0	0	0	0	0	0	1	0	0	0	0	0.007434944	0	0	0.007434944	39.25	39.25	39.25	100	100	100	100	100	100	PASS
NDUFA6	0	0	0	2152	2	0.0002632186	64598	17	0	1	1843	1	0.000131	0	0	0.000131	0	0	0	0	39.01	39.0099983215332	39.01	100	100	100	100	100	100	PASS
NDUFA8	0	0	0	2152	1	0.000015489	64598	1	0	1	1843	1	0	0	0	0	0.000464684	0	0	0.000464684	39.21	39.2099990844727	39.21	100	100	100	100	100	100	PASS
NDUFA9	0	0	0	0	0	0	0	0	0	0	0	1	0.000656	0	0	0.000656	0.00139405	0	0	0.00139405	37.7	37.7000007629395	37.7	100	100	100	100	100	100	PASS
NDUFAF1	0	0	0	2152	3	0.0001858615	64598	12	0	1	1843	1	0	0	0	0	0	0	0	0	35.69	35.689998626709	35.69	100	100	100	100	100	100	PASS
NDUFAF2	0	0	0	2152	3	0.0001084661	64598	7	0	1	1843	1	0.000262	0.000262	0	0.000524	0.00929368	0	0	0.00929368	37.71	37.7099990844727	37.71	100	100	100	95.69	95.6900024414062	95.69	PASS
NDUFAF3	0	0	0	2152	2	0.0001548434	64598	10	0	1	1843	1	0	0	0	0	0.007899624	0	0	0.007899624	41.61	41.6100006103516	41.61	100	100	100	100	100	100	PASS
NDUFAF5	0	0	0	2152	1	0.0000464713	64598	3	0	1	1843	1	0	0	0	0	0	0	0	0	36.23	36.2299995422363	36.23	100	100	100	100	100	100	PASS
NDUFAF6	1	0.000464684	1	2152	8	0.0003562513	64598	23	0.38335469210007	0.54462685666164	1003.7472968274	1	0	0.000131	0	0.000131	0.003717468	0	0	0.003717468	39.59	39.5900001525879	39.59	100	100	100	100	100	100	PASS
NDUFAF8	0	0	0	2152	2	0.0012078785	64598	78	0	0.184856407034492	340.690358164569	1	0	0	0	0	0.000464684	0	0	0.000464684	40.97	40.9700012207031	40.97	100	100	100	100	100	100	PASS
NDUFB10	0	0	0	0	0	0	0	0	0	0	0	1	0	0	0	0	0	0	0	0	45.05	45.0499992370606	45.05	100	100	100	100	100	100	PASS
NDUFB3	1	0.000464684	1	2152	3	0.0020607019	64598	133	-2.14881394456296	0.136547307786714	251.656688250915	1	0	0	0	0	0	0	0	0	37.2	37.2000007629395	37.2	100	100	100	100	100	100	PASS
NDUFB8	0	0	0	2152	1	0.0000464756	64598	3	0	1	1843	1	0	0	0	0	0	0	0	0	33.11	33.1100006103516	33.11	100	100	100	100	100	100	PASS
NDUFB9	1	0.000465116	1	2152	2	0.0001393514	64598	9	1.73886307284131	0.279443124762769	515.013678937783	1	0	0	0	0	0.0027881	0	0	0.0027881	33.66	33.6599998474121	33.66	100	100	100	93.88	93.879997253418	93.88	PASS
NDUFC2	0	0	0	0	0	0	0	0	0	0	0	1	0	0	0	0	0	0	0	0	37.26	37.2599983215332	37.26	100	100	100	100	100	100	PASS
NDUFS1	1	0.000464684	1	2152	6	0.000356236	64598	23	0.383416653159948	0.54462685666164	1003.7472968274	1	0.000131	0	0	0.000131	0	0	0	0	37.68	37.6800003051758	37.68	100	100	100	100	100	100	PASS
NDUFS2	0	0	0	2152	1	0.0000154851	64598	1	0	1	1843	1	0.000131	0	0	0.000131	0.00185874	0	0	0.00185874	34.77	34.7700004577637	34.77	100	100	100	100	100	100	PASS
NDUFS3	0	0	0	2152	4	0.0001704677	64598	11	0	1	1843	1	0	0	0	0	0.00185874	0	0	0.00185874	39.68	39.6800003051758	39.68	100	100	100	94.79	94.7900009155273	94.79	PASS
NDUFS4	0	0	0	2152	2	0.0000464972	64598	3	0	1	1843	1	0.000131	0	0	0.000131	0.011617098	0	0	0.011617098	35.29	35.2900009155273	35.29	100	100	100	100	100	100	PASS
NDUFS6	0	0	0	2152	1	0.0000309924	64598	2	0	1	1843	1	0	0	0	0	0.000464684	0	0	0.000464684	45.75	45.75	45.75	100	100	100	100	100	100	PASS
NDUFS7	0	0	0	2152	2	0.0001548505	64598	10	0	1	1843	1	0.000262	0	0	0.000262	0	0	0	0	50.38	50.3800010681152	50.38	100	100	100	100	100	100	PASS
NDUFV1	0	0	0	2152	9	0.0005885806	64598	38	0	0.635514997973828	1171.25414126577	1	0.000396	0	0	0.000396	0	0	0	0	35.37	35.3699989318848	35.37	100	100	100	98.22	98.2200012207031	98.22	PASS
NDUFV2	0	0	0	2152	4	0.0000774363	64598	5	0	1	1843	1	0.001049	0	0	0.001049	0.000464684	0	0	0.000464684	37.77	37.7700004577637	37.77	100	100	100	98.71	98.7099990844727	98.71	PASS
NEB	2	0.001394052	3	2152	48	0.0016126004	64598	104	-0.210104608416885	0	0	NA	0.001179	0	0	0.001179	0.004646842	0	0	0.004646842	31.06	31.0599994659424	31.06	90.53	90.5299987792969	90.53	85.83	85.8300018310547	85.83	LOW_DP
NECAP1	0	0	0	2152	1	0.0000154871	64598	1	0	1	1843	1	0.00551	0	0	0.00551	0.00139405	0	0	0.00139405	34.29	34.2900009155273	34.29	100	100	100	97.53	97.5299987792969	97.53	PASS
NECTIN1	0	0	0	0	0	0	0	0	0	0	0	1	0	0	0	0	0	0	0	0	38.76	38.7599983215332	38.76	100	100	100	99.87	99.870002746582	99.87	PASS
NECTIN4	0	0	0	0	0	0	0	0	0	0	0	1	0	0	0	0	0.00185874	0	0	0.00185874	37.9	37.9000015258789	37.9	100	100	100	100	100	100	PASS
NEK10	0	0	0	2152	1	0.0000309722	64598	2	0	1	1843	1	0.000262	0	0	0.000262	0.003252784	0	0	0.003252784	36.75	36.75	36.75	100	100	100	100	100	100	PASS
NEK2	0	0	0	0	0	0	0	0	0	0	0	1	0	0	0	0	0.00185874	0	0	0.00185874	36.65	36.6500015258789	36.65	100	100	100	100	100	100	PASS
NEK8	0	0	0	2152	3	0.0001238965	64598	8	0	1	1843	1	0	0	0	0	0	0	0	0	39.11	39.1100006103516	39.11	100	100	100	100	100	100	PASS
NEK9	0	0	0	2152	3	0.0001084257	64598	7	0	1	1843	1	0.000918	0	0	0.000918	0.007899624	0	0	0.007899624	34.95	34.9500007629395	34.95	100	100	100	99.47	99.4700012207031	99.47	PASS
NEMF	0	0	0	2152	1	0.0000464684	64598	3	0	1	1843	1	0	0	0	0	0.00743494	0.00139405	0.000464684	0.009293674	38.97	38.9700012207031	38.97	100	100	100	98.37	98.370002746582	98.37	PASS
NEPRO	0	0	0	0	0	0	0	0	0	0	0	1	0	0	0	0	0.007899624	0	0	0.007899624	35.99	35.9900016784668	35.99	100	100	100	100	100	100	PASS
NEU1	0	0	0	2152	12	0.0002478426	64598	16	0	1	1843	1	0	0	0	0	0.000464684	0	0	0.000464684	38.98	38.9799995422363	38.98	100	100	100	100	100	100	PASS
NEUROG3	0	0	0	0	0	0	0	0	0	0	0	1	0	0	0	0	0.000464684	0	0	0.000464684	45.99	45.9900016784668	45.99	100	100	100	100	100	100	PASS
NFASC	0	0	0	2152	1	0.0000154885	64598	1	0	1	1843	1	0	0	0	0	0.002323424	0	0	0.002323424	37.06	37.060001373291	37.06	100	100	100	100	100	100	PASS
NFU1	0	0	0	2152	1	0.000123908	64598	8	0	1	1843	1	0	0	0	0	0.003252788	0	0	0.003252788	36.05	36.0499992370606	36.05	100	100	100	100	100	100	PASS
NGLY1	0	0	0	2152	7	0.0006039661	64598	39	0	0.637984670785712	1175.80574825807	1	0.001443	0.000132	0	0.001575	0.005576204	0	0	0.005576204	35.19	35.189998626709	35.19	100	100	100	99.96	99.9599990844727	99.96	PASS
NHLRC1	0	0	0	2152	5	0.0003251911	64598	21	0	1	1843	1	0	0	0	0	0.000464684	0	0	0.000464684	40.86	40.8600006103516	40.86	100	100	100	100	100	100	PASS
NHLRC2	1	0.00185874	4	2152	2	0.0002787676	64598	18	2.73719018300409	0.00495086337781846	9.12444120531942	0.19413704692169	0	0	0	0	0	0	0	0	37.34	37.3400001525879	37.34	100	100	100	100	100	100	PASS
NIN	0	0	0	2152	1	0.0000154828	64598	1	0	1	1843	1	0.002886	0	0	0.002886	0.00743494	0	0	0.00743494	36.46	36.4599990844727	36.46	100	100	100	99.75	99.75	99.75	PASS
NIPAL4	1	0.000464684	1	2152	4	0.00142484	64598	92	-1.61647804743187	0.375862436827414	692.714471072924	1	0	0	0	0	0.007434944	0	0	0.007434944	35.68	35.6800003051758	35.68	100	100	100	100	100	100	PASS
NKX3-2	0	0	0	0	0	0	0	0	0	0	0	1	0	0	0	0	0.000464684	0	0	0.000464684	43.38	43.3800010681152	43.38	100	100	100	100	100	100	PASS
NKX6-2	0	0	0	2152	2	0.0000468418	64598	3	0	1	1843	1	0	0	0	0	0	0	0	0	35.61	35.6100006103516	35.61	100	100	100	100	100	100	PASS
NLRP1	0	0	0	0	0	0	0	0	0	0	0	1	0.000393	0	0	0.000393	0	0	0	0	37	37	37	100	100	100	100	100	100	PASS
NLRP7	0	0	0	2152	1	0.0000619694	64598	4	0	1	1843	1	0	0	0	0	0	0	0	0	40.45	40.4500007629395	40.45	100	100	100	100	100	100	PASS
NME8	0	0	0	2152	2	0.0001239037	64598	8	0	1	1843	1	0	0	0	0	0.005576208	0	0	0.005576208	38.15	38.1500015258789	38.15	100	100	100	100	100	100	PASS
NMNAT1	0	0	0	2152	13	0.001749879	64598	113	0	0.0547018305353255	100.815473676605	0.876656292840043	0	0	0	0	0	0	0	0	36.79	36.7900009155273	36.79	100	100	100	100	100	100	PASS
NNT	0	0	0	2152	1	0.0000154866	64598	1	0	1	1843	1	0.002229	0	0	0.002229	0.011152414	0	0	0.011152414	37.08	37.0800018310547	37.08	100	100	100	100	100	100	PASS
NOS1AP	0	0	0	0	0	0	0	0	0	0	0	1	0.000393	0.000524	0	0.000917	0.003252792	0	0	0.003252792	37.13	37.1300010681152	37.13	100	100	100	100	100	100	PASS
NPC1	1	0.000464684	1	2152	24	0.0013163941	64598	85	-1.50226958957687	0.531656047879129	979.842096241234	1	0.000131	0	0	0.000131	0	0	0	0	36.51	36.5099983215332	36.51	100	100	100	98.44	98.4400024414063	98.44	PASS
NPC2	0	0	0	2152	4	0.0002013422	64598	13	0	1	1843	1	0	0	0	0	0.00743494	0	0	0.00743494	31.75	31.75	31.75	100	100	100	100	100	100	PASS
NPHP1	0	0	0	2152	8	0.0005114529	64598	33	0	0.627114656566696	1155.77231205242	1	0	0	0	0	0.005111526	0	0	0.005111526	38.87	38.8699989318848	38.87	100	100	100	100	100	100	PASS
NPHP3	0	0	0	2152	17	0.0011152857	64598	72	0	0.177209777321954	326.597619604362	1	0.001574	0	0	0.001574	0.012081784	0	0	0.012081784	35.81	35.810001373291	35.81	100	100	100	99.89	99.8899993896485	99.89	PASS
NPHP4	2	0.0009298	2	2152	13	0.0003871939	64598	25	1.26386420183185	0.215902758034435	397.908783057464	1	0.00118	0.000262	0	0.001442	0.000464684	0	0	0.000464684	41.41	41.4099998474121	41.41	100	100	100	100	100	100	PASS
NPHS1	2	0.000929368	2	2152	35	0.0017969294	64598	116	-0.951211851622741	0.595495492948096	1097.49819350334	1	0	0.000131	0	0.000131	0.000464684	0	0	0.000464684	37.03	37.0299987792969	37.03	100	100	100	99.98	99.9800033569336	99.98	PASS
NPHS2	2	0.002788108	6	2152	14	0.0006504302	64598	42	2.09982029686769	0.00429675208134605	7.91891408592076	0.172150306215669	0	0	0	0	0.00185874	0	0	0.00185874	33.8	33.7999992370606	33.8	100	100	100	99.2	99.1999969482422	99.2	PASS
NPR2	0	0	0	2152	3	0.0000464641	64598	3	0	1	1843	1	0	0	0	0	0	0	0	0	39.35	39.3499984741211	39.35	100	100	100	100	100	100	PASS
NR1H3	0	0	0	2152	1	0.000495448	64598	32	0	0.626368259711495	1154.39670264828	1	0	0	0	0	0	0	0	0	36.09	36.0900001525879	36.09	100	100	100	100	100	100	PASS
NR1H4	0	0	0	2152	1	0.000015502	64598	1	0	1	1843	1	0	0.000131	0	0.000131	0.006040894	0	0.000464684	0.006505578	35.79	35.7900009155273	35.79	100	100	100	99.74	99.7399978637695	99.74	PASS
NR2E3	1	0.00232342	5	2152	15	0.0015961146	64598	103	0.541685730972999	0.402711498389539	742.197291531921	1	0	0	0	0	0	0	0	0	42.21	42.2099990844727	42.21	100	100	100	100	100	100	PASS
NRL	0	0	0	2152	1	0.00147173	64598	95	0	0.0784659727086314	144.612787702008	1	0	0	0	0	0	0	0	0	39.85	39.8499984741211	39.85	100	100	100	100	100	100	PASS
NRROS	0	0	0	0	0	0	0	0	0	0	0	1	0	0	0	0	0.000464684	0	0	0.000464684	40.11	40.1100006103516	40.11	100	100	100	100	100	100	PASS
NRXN1	0	0	0	2152	4	0.0000775359	64598	5	0	1	1843	1	0.009965	0.003676	0	0.013641	0.005111524	0	0	0.005111524	38.36	38.3600006103516	38.36	100	100	100	99.93	99.9300003051758	99.93	PASS
NSMCE2	0	0	0	2152	1	0.000325158	64598	21	0	1	1843	1	0.005638	0	0	0.005638	0.0027881	0	0	0.0027881	37.96	37.9599990844727	37.96	100	100	100	100	100	100	PASS
NSMCE3	0	0	0	0	0	0	0	0	0	0	0	1	0.000262	0	0	0.000262	0	0	0	0	42.36	42.3600006103516	42.36	100	100	100	100	100	100	PASS
NSUN2	0	0	0	0	0	0	0	0	0	0	0	1	0.000262	0	0	0.000262	0	0	0	0	40.78	40.7799987792969	40.78	100	100	100	100	100	100	PASS
NT5C2	0	0	0	2152	4	0.0001239446	64598	8	0	1	1843	1	0	0.001705	0	0.001705	0.000464684	0	0	0.000464684	36.41	36.4099998474121	36.41	100	100	100	100	100	100	PASS
NT5C3A	0	0	0	2152	3	0.0000619479	64598	4	0	1	1843	1	0.00446	0	0	0.00446	0.00464684	0	0	0.00464684	36.69	36.689998626709	36.69	100	100	100	100	100	100	PASS
NT5E	0	0	0	2152	3	0.0001858894	64598	12	0	1	1843	1	0	0	0	0	0	0	0	0	36.35	36.3499984741211	36.35	100	100	100	100	100	100	PASS
NTHL1	0	0	0	2152	9	0.0003407452	64598	22	0	1	1843	1	0	0	0	0	0	0	0	0	43.54	43.5400009155273	43.54	100	100	100	100	100	100	PASS
NTNG2	0	0	0	0	0	0	0	0	0	0	0	1	0.000131	0.00945	0	0.009581	0.000929368	0.000464684	0	0.001394052	41.77	41.7700004577637	41.77	100	100	100	100	100	100	PASS
NTRK1	1	0.000464684	1	2152	7	0.0001084124	64598	7	2.09972019203711	0.230628052185011	425.047500176976	1	0.000131	0.000262	0	0.000393	0	0	0	0	38.23	38.2299995422363	38.23	100	100	100	100	100	100	PASS
NUBPL	0	0	0	2152	5	0.0002168056	64598	14	0	1	1843	1	0.000525	0.000131	0	0.000656	0	0	0.000464684	0.000464684	38	38	38	100	100	100	100	100	100	PASS
NUP107	0	0	0	0	0	0	0	0	0	0	0	1	0	0	0	0	0.00557621	0	0	0.00557621	38.66	38.6599998474121	38.66	100	100	100	100	100	100	PASS
NUP133	0	0	0	2152	1	0.000108409	64598	7	0	1	1843	1	0	0.000131	0	0.000131	0	0	0	0	34.74	34.7400016784668	34.74	100	100	100	100	100	100	PASS
NUP155	0	0	0	0	0	0	0	0	0	0	0	1	0	0	0	0	0.010687732	0	0	0.010687732	37.41	37.4099998474121	37.41	100	100	100	99.56	99.5599975585938	99.56	PASS
NUP160	0	0	0	0	0	0	0	0	0	0	0	1	0	0	0	0	0	0	0	0	36.53	36.5299987792969	36.53	100	100	100	100	100	100	PASS
NUP188	0	0	0	2152	1	0.000030978	64598	2	0	1	1843	1	0.00118	0	0	0.00118	0.001859168	0	0	0.001859168	37.29	37.2900009155273	37.29	100	100	100	99.89	99.8899993896485	99.89	PASS
NUP205	0	0	0	0	0	0	0	0	0	0	0	1	0.002633	0	0	0.002633	0.000464684	0	0	0.000464684	35.52	35.5200004577637	35.52	100	100	100	99.14	99.1399993896484	99.14	PASS
NUP214	0	0	0	0	0	0	0	0	0	0	0	1	0.000393	0.000133	0	0.000526	0.001394052	0	0	0.001394052	37.04	37.0400009155273	37.04	100	100	100	100	100	100	PASS
NUP37	0	0	0	0	0	0	0	0	0	0	0	1	0	0.000262	0	0.000262	0.00557621	0	0	0.00557621	35.63	35.6300010681152	35.63	100	100	100	100	100	100	PASS
NUP62	0	0	0	0	0	0	0	0	0	0	0	1	0	0	0	0	0.000464684	0	0	0.000464684	35.59	35.5900001525879	35.59	100	100	100	99.36	99.3600006103516	99.36	PASS
NUP85	0	0	0	0	0	0	0	0	0	0	0	1	0.000787	0.000795	0	0.001582	0.000464684	0	0	0.000464684	37.36	37.3600006103516	37.36	100	100	100	99.2	99.1999969482422	99.2	PASS
NUP88	0	0	0	0	0	0	0	0	0	0	0	1	0	0.006826	0	0.006826	0	0	0	0	37.64	37.6399993896484	37.64	100	100	100	100	100	100	PASS
NUP93	2	0.00697026	15	2152	3	0.0007433861	64598	48	3.22902885381863	0.00000000114408744718517	0.00000210855316516227	0.000000527138291290567	0.000656	0.000131	0	0.000787	0.009293684	0	0	0.009293684	35.05	35.0499992370606	35.05	100	100	100	100	100	100	PASS
NUS1	0	0	0	0	0	0	0	0	0	0	0	1	0	0	0	0	0.000464684	0	0	0.000464684	34.51	34.5099983215332	34.51	100	100	100	98.83	98.8300018310547	98.83	PASS
NXN	0	0	0	0	0	0	0	0	0	0	0	1	0.009467	0.004226	0	0.013693	0.005576206	0.000464684	0	0.00604089	40.45	40.4500007629395	40.45	100	100	100	99.93	99.9300003051758	99.93	PASS
OAT	1	0.000464684	1	2152	16	0.0006039931	64598	39	-0.378282097510787	1	1843	1	0	0	0	0	0	0	0	0	38.66	38.6599998474121	38.66	100	100	100	100	100	100	PASS
OBSL1	1	0.00325279	7	2152	8	0.0006194885	64598	40	2.39252827908187	0.000728421825541987	1.34248142447388	0.0433058524023833	0	0	0	0	0	0	0	0	43.29	43.2900009155274	43.29	100	100	100	100	100	100	PASS
OCA2	1	0.000464684	1	2152	14	0.001239089	64598	80	-1.41495793966459	0.524960684586409	967.502541692752	1	0.010398	0	0	0.010398	0.006040898	0.000929368	0.000464684	0.00743495	36.89	36.8899993896484	36.89	100	100	100	99.65	99.6500015258789	99.65	PASS
OCLN	0	0	0	2152	2	0.0000481475	64598	3	0	0	0	NA	0	0	0	0	0.00929368	0	0	0.00929368	27.56	27.5599994659424	27.56	86.65	86.6500015258789	86.65	67.38	67.379997253418	67.38	LOW_DP
ODAD1	0	0	0	2152	4	0.0005730179	64598	37	0	0	0	NA	0	0	0	0	0	0	0	0	0	0	0	0	0	0	0	0	0	LOW_DP
ODAD2	0	0	0	2152	3	0.0002168191	64598	14	0	0	0	NA	0	0	0	0	0	0	0	0	0	0	0	0	0	0	0	0	0	LOW_DP
ODAD3	0	0	0	2152	1	0.0000309693	64598	2	0	0	0	NA	0	0	0	0	0	0	0	0	0	0	0	0	0	0	0	0	0	LOW_DP
ODAD4	0	0	0	2152	2	0.000201342	64598	13	0	0	0	NA	0	0	0	0	0	0	0	0	0	0	0	0	0	0	0	0	0	LOW_DP
ODAPH	0	0	0	2152	1	0.0000619502	64598	4	0	1	1843	1	0	0	0	0	0.007899624	0	0	0.007899624	35.73	35.7299995422363	35.73	100	100	100	99.68	99.6800003051758	99.68	PASS
OGDH	0	0	0	0	0	0	0	0	0	0	0	1	0.000656	0	0	0.000656	0.00464684	0	0	0.00464684	40.35	40.3499984741211	40.35	100	100	100	100	100	100	PASS
OPA1	0	0	0	2152	4	0.000092945	64598	6	0	1	1843	1	0.000393	0	0	0.000393	0.000464684	0	0	0.000464684	38.24	38.2400016784668	38.24	100	100	100	100	100	100	PASS
OPA3	0	0	0	2152	1	0.000030978	64598	2	0	1	1843	1	0.000131	0	0	0.000131	0.003717476	0	0	0.003717476	35.66	35.6599998474121	35.66	100	100	100	99.05	99.0500030517578	99.05	PASS
ORAI1	0	0	0	2152	1	0.0000619444	64598	4	0	1	1843	1	0	0	0	0	0.000464684	0	0	0.000464684	44.78	44.7799987792969	44.78	100	100	100	100	100	100	PASS
ORC1	2	0.000929368	2	2152	8	0.0006813191	64598	44	0.447919319191942	0.660548191652714	1217.39031721595	1	0	0	0	0	0	0.000464684	0	0.000464684	37.07	37.0699996948242	37.07	100	100	100	99.91	99.9100036621094	99.91	PASS
ORC4	0	0	0	2152	2	0.0000774359	64598	5	0	1	1843	1	0.008657	0	0	0.008657	0.005111526	0	0	0.005111526	35.56	35.560001373291	35.56	100	100	100	99.39	99.3899993896484	99.39	PASS
ORC6	1	0.00327103	7	2152	1	0.000666398	64598	43	2.2952890150554	0.00106387501991681	1.96072166170669	0.0569874792925434	0	0	0	0	0.008829	0	0	0.008829	38.89	38.8899993896484	38.89	100	100	100	100	100	100	PASS
OSGEP	0	0	0	2152	5	0.0010685887	64598	69	0	0.175957848957577	324.290315628814	1	0	0	0	0	0	0	0	0	34.94	34.939998626709	34.94	100	100	100	100	100	100	PASS
OSTM1	0	0	0	0	0	0	0	0	0	0	0	1	0	0	0	0	0	0	0	0	35.16	35.1599998474121	35.16	100	100	100	100	100	100	PASS
OTOA	0	0	0	2152	3	0.0001858535	64598	12	0	0	0	NA	0.000656	0.00118	0	0.001836	0.000464684	0	0	0.000464684	28.28	28.2800006866455	28.28	80.44	80.4400024414063	80.44	79.61	79.6100006103516	79.61	LOW_DP
OTOF	1	0.000464684	1	2152	19	0.000635058	64598	41	-0.450638388760845	1	1843	1	0.001711	0.000131	0	0.001842	0.000464684	0	0	0.000464684	37.69	37.689998626709	37.69	100	100	100	97.69	97.6900024414063	97.69	PASS
OTOG	2	0.007434944	16	2152	14	0.0015798706	64598	102	2.23451547727313	0.00000134982612409591	0.00248772954670877	0.00025516141831622	0.000131	0	0	0.000131	0.000464684	0	0	0.000464684	39.33	39.3300018310547	39.33	100	100	100	100	100	100	PASS
OTOGL	2	0.000929368	2	2152	19	0.0009761497	64598	63	-0.0708524422139762	1	1843	1	0.001312	0	0	0.001312	0.00557621	0.000464684	0	0.006040894	35.25	35.25	35.25	100	100	100	99.59	99.5899963378906	99.59	PASS
OTOP2	0	0	0	2152	1	0.0000464626	64598	3	0	1	1843	1	0	0	0	0	0	0	0	0	36.48	36.4799995422363	36.48	100	100	100	99.91	99.9100036621094	99.91	PASS
OTUD6B	0	0	0	2152	2	0.0002633682	64598	17	0	1	1843	1	0	0	0	0	0.003717468	0	0	0.003717468	37.44	37.439998626709	37.44	100	100	100	99.18	99.1800003051758	99.18	PASS
OTULIN	0	0	0	0	0	0	0	0	0	0	0	1	0.000131	0	0	0.000131	0	0	0	0	38.84	38.8400001525879	38.84	100	100	100	100	100	100	PASS
OXCT1	1	0.0027881	6	2152	4	0.0017969056	64598	116	0.633767687667871	0.294383881204935	542.549493060694	1	0.000131	0	0	0.000131	0.00929368	0	0	0.00929368	39.41	39.4099998474121	39.41	100	100	100	100	100	100	PASS
OXR1	0	0	0	0	0	0	0	0	0	0	0	1	0.001704	0.000787	0	0.002491	0.0027881	0	0.000464684	0.003252784	36.62	36.6199989318848	36.62	100	100	100	100	100	100	PASS
P2RY12	0	0	0	2152	4	0.0000929566	64598	6	0	1	1843	1	0	0	0	0	0.012081784	0	0	0.012081784	36.37	36.3699989318848	36.37	100	100	100	98.57	98.5699996948242	98.57	PASS
P3H1	0	0	0	2152	5	0.0001548462	64598	10	0	1	1843	1	0.000131	0	0	0.000131	0	0	0	0	41.96	41.9599990844727	41.96	100	100	100	100	100	100	PASS
P3H2	0	0	0	2152	9	0.0002478237	64598	16	0	1	1843	1	0.000918	0	0	0.000918	0.003252788	0	0	0.003252788	34.89	34.8899993896484	34.89	100	100	100	99.16	99.1600036621094	99.16	PASS
P4HTM	0	0	0	2152	1	0.0000309713	64598	2	0	1	1843	1	0	0	0	0	0.007899624	0	0	0.007899624	43.02	43.0200004577637	43.02	100	100	100	100	100	100	PASS
PADI3	2	0.00836431	18	2152	8	0.0184319913	64598	1191	-1.13989350340342	0.000200802743375904	0.370079456041791	0.0151911659068911	0	0	0	0	0	0	0	0	35.77	35.7700004577637	35.77	100	100	100	100	100	100	PASS
PADI6	0	0	0	0	0	0	0	0	0	0	0	1	0.000131	0	0	0.000131	0	0	0	0	39.65	39.6500015258789	39.65	100	100	100	99.96	99.9599990844727	99.96	PASS
PAH	11	0.01301115	28	2152	109	0.0119876593	64598	774	0.118198494483341	0.615466911714361	1134.30551828957	1	0	0	0	0	0.008364314	0	0	0.008364314	37.85	37.8499984741211	37.85	100	100	100	100	100	100	PASS
PAM16	0	0	0	0	0	0	0	0	0	0	0	1	0.000145	0	0	0.000145	0.006970268	0	0	0.006970268	42.7	42.7000007629395	42.7	100	100	100	100	100	100	PASS
PANK2	1	0.000464684	1	2152	16	0.0008674513	64598	56	-0.900532794102721	1	1843	1	0.006558	0.000131	0	0.006689	0.025557624	0	0	0.025557624	40.02	40.0200004577637	40.02	100	100	100	99.21	99.2099990844727	99.21	PASS
PAPSS2	1	0.000929368	2	2152	3	0.0002015903	64598	13	2.20482374904516	0.0826570463912132	152.336936499006	1	0.000131	0	0	0.000131	0.000464684	0	0	0.000464684	36.86	36.8600006103516	36.86	100	100	100	100	100	100	PASS
PARK7	0	0	0	2152	1	0.0000774234	64598	5	0	1	1843	1	0	0	0	0	0.000464684	0	0	0.000464684	42.14	42.1399993896484	42.14	100	100	100	100	100	100	PASS
PARN	0	0	0	2152	5	0.0003717317	64598	24	0	1	1843	1	0.001311	0	0	0.001311	0	0	0	0	39.78	39.7799987792969	39.78	100	100	100	100	100	100	PASS
PARS2	0	0	0	0	0	0	0	0	0	0	0	1	0	0	0	0	0	0	0	0	37.94	37.939998626709	37.94	100	100	100	99.16	99.1600036621094	99.16	PASS
PATL2	0	0	0	2152	2	0.000061933	64598	4	0	1	1843	1	0	0	0	0	0	0	0	0	35.73	35.7299995422363	35.73	100	100	100	100	100	100	PASS
PAX1	0	0	0	0	0	0	0	0	0	0	0	1	0.000131	0	0	0.000131	0	0	0	0	34.6	34.5999984741211	34.6	100	100	100	97.96	97.9599990844727	97.96	PASS
PAX7	0	0	0	2152	1	0.0000154851	64598	1	0	1	1843	1	0.001443	0.000131	0	0.001574	0.000464684	0.000464684	0	0.000929368	34.37	34.3699989318848	34.37	100	100	100	99.36	99.3600006103516	99.36	PASS
PC	0	0	0	2152	1	0.0000309789	64598	2	0	1	1843	1	0	0	0	0	0	0	0	0	43.26	43.2599983215332	43.26	100	100	100	100	100	100	PASS
PCBD1	0	0	0	2152	1	0.000216779	64598	14	0	1	1843	1	0	0	0	0	0.000464684	0	0	0.000464684	40.09	40.0900001525879	40.09	100	100	100	100	100	100	PASS
PCCA	1	0.000464684	1	2152	16	0.0005267963	64598	34	-0.180995241908321	1	1843	1	0.002754	0.001745	0	0.004499	0.000464684	0.000464684	0	0.000929368	35.96	35.9599990844727	35.96	100	100	100	100	100	100	PASS
PCCB	1	0.000464684	1	2152	15	0.000805345	64598	52	-0.793356977820779	1	1843	1	0.000131	0	0	0.000131	0.018122674	0	0	0.018122674	38.84	38.8400001525879	38.84	100	100	100	100	100	100	PASS
PCDH12	0	0	0	2152	3	0.0001858756	64598	12	0	1	1843	1	0	0	0	0	0.007434944	0	0	0.007434944	37.17	37.1699981689453	37.17	100	100	100	98.83	98.8300018310547	98.83	PASS
PCDH15	4	0.001858736	4	2152	18	0.0004492958	64598	29	2.04858439516041	0.0209491920446336	38.6093609382597	0.508017907082365	0.00472	0.000786	0	0.005506	0.005576208	0	0.000929368	0.006505576	33.42	33.4199981689453	33.42	100	100	100	98.45	98.4499969482422	98.45	PASS
PCK1	0	0	0	2152	1	0.0000464684	64598	3	0	1	1843	1	0	0	0	0	0	0	0	0	39.91	39.9099998474121	39.91	100	100	100	99.85	99.8499984741211	99.85	PASS
PCK2	0	0	0	0	0	0	0	0	0	0	0	1	0	0	0	0	0	0	0	0	42.45	42.4500007629395	42.45	100	100	100	100	100	100	PASS
PCLO	0	0	0	0	0	0	0	0	0	0	0	1	0.001453	0.001181	0	0.002634	0.00464684	0	0	0.00464684	33.58	33.5800018310547	33.58	100	100	100	98.59	98.5899963378906	98.59	PASS
PCNT	0	0	0	2152	16	0.0005576532	64598	36	0	0.63130661953765	1163.49809980789	1	0.001967	0.000132	0	0.002099	0.002788108	0	0	0.002788108	41.5	41.5	41.5	100	100	100	100	100	100	PASS
PCSK1	0	0	0	2152	1	0.0000154919	64598	1	0	1	1843	1	0	0	0	0	0.01022305	0	0	0.01022305	37.38	37.3800010681152	37.38	100	100	100	100	100	100	PASS
PCYT1A	0	0	0	2152	3	0.0000929167	64598	6	0	1	1843	1	0	0	0	0	0.000464684	0	0	0.000464684	36.53	36.5299987792969	36.53	100	100	100	100	100	100	PASS
PCYT2	0	0	0	2152	1	0.0000932981	64598	6	0	1	1843	1	0	0	0	0	0	0	0	0	43.18	43.1800003051758	43.18	100	100	100	100	100	100	PASS
PDE10A	0	0	0	0	0	0	0	0	0	0	0	1	0.001329	0.000918	0	0.002247	0.005576204	0	0	0.005576204	36.23	36.2299995422363	36.23	100	100	100	99.95	99.9499969482422	99.95	PASS
PDE2A	0	0	0	0	0	0	0	0	0	0	0	1	0	0.000393	0	0.000393	0	0	0	0	39.01	39.0099983215332	39.01	100	100	100	100	100	100	PASS
PDE6B	0	0	0	2152	16	0.0006659745	64598	43	0	0.404930193891774	746.286347342539	1	0.000131	0.000131	0	0.000262	0	0	0	0	42.51	42.5099983215332	42.51	100	100	100	100	100	100	PASS
PDE6C	1	0.000464684	1	2152	3	0.0000775418	64598	5	2.58320384054318	0.178507578700088	328.989467544262	1	0	0	0	0	0.000464684	0	0	0.000464684	34.24	34.2400016784668	34.24	100	100	100	99.73	99.7300033569336	99.73	PASS
PDE6D	0	0	0	0	0	0	0	0	0	0	0	1	0.000787	0	0	0.000787	0	0	0	0	35.85	35.8499984741211	35.85	100	100	100	100	100	100	PASS
PDE6G	0	0	0	0	0	0	0	0	0	0	0	1	0	0	0	0	0.000464684	0	0	0.000464684	42.18	42.1800003051758	42.18	100	100	100	100	100	100	PASS
PDGFRB	0	0	0	2152	2	0.0000309713	64598	2	0	1	1843	1	0	0	0	0	0	0	0	0	37.68	37.6800003051758	37.68	100	100	100	100	100	100	PASS
PDHB	0	0	0	2152	2	0.0000464564	64598	3	0	1	1843	1	0	0	0	0	0.007899624	0	0	0.007899624	36.53	36.5299987792969	36.53	100	100	100	100	100	100	PASS
PDHX	0	0	0	2152	4	0.0000619862	64598	4	0	1	1843	1	0.000262	0	0	0.000262	0.00139405	0	0	0.00139405	37.05	37.0499992370605	37.05	100	100	100	100	100	100	PASS
PDP1	0	0	0	0	0	0	0	0	0	0	0	1	0	0	0	0	0.003717468	0	0	0.003717468	36.34	36.3400001525879	36.34	100	100	100	100	100	100	PASS
PDSS1	0	0	0	0	0	0	0	0	0	0	0	1	0	0.001204	0	0.001204	0	0	0	0	38.14	38.1399993896484	38.14	100	100	100	100	100	100	PASS
PDSS2	0	0	0	2152	3	0.0002014154	64598	13	0	1	1843	1	0.003326	0.000131	0	0.003457	0.000929368	0.000464684	0.000464684	0.001858736	37.87	37.8699989318848	37.87	100	100	100	100	100	100	PASS
PDX1	0	0	0	2152	2	0.0002478696	64598	16	0	1	1843	1	0	0	0	0	0	0	0	0	34.3	34.2999992370606	34.3	100	100	100	94.05	94.0500030517578	94.05	PASS
PDXK	0	0	0	2152	2	0.0000619444	64598	4	0	1	1843	1	0.000131	0	0	0.000131	0	0	0	0	41.95	41.9500007629395	41.95	100	100	100	100	100	100	PASS
PDZD7	0	0	0	2152	6	0.0031575365	64598	204	0	0.00226651057568531	4.17717899098802	0.099456642642572	0.000131	0	0	0.000131	0	0	0	0	35.58	35.5800018310547	35.58	100	100	100	98.65	98.6500015258789	98.65	PASS
PEPD	0	0	0	2152	6	0.000464579	64598	30	0	1	1843	1	0.000131	0	0	0.000131	0.002323424	0	0	0.002323424	42.37	42.3699989318848	42.37	100	100	100	100	100	100	PASS
PERCC1	0	0	0	0	0	0	0	0	0	0	0	1	0	0	0	0	0.000464684	0	0	0.000464684	0	0	0	0	0	0	0	0	0	LOW_DP
PERP	0	0	0	0	0	0	0	0	0	0	0	1	0.000133	0	0	0.000133	0.000464684	0	0	0.000464684	37.03	37.0299987792969	37.03	100	100	100	99.88	99.879997253418	99.88	PASS
PET100	0	0	0	0	0	0	0	0	0	0	0	1	0.000131	0	0	0.000131	0.00836431	0	0	0.00836431	39.26	39.2599983215332	39.26	100	100	100	100	100	100	PASS
PEX1	2	0.000929368	2	2152	24	0.0023698139	64598	153	-1.35045189369535	0.249878961570746	460.526926174885	1	0.000131	0	0	0.000131	0.00464684	0	0	0.00464684	35.52	35.5200004577637	35.52	100	100	100	100	100	100	PASS
PEX10	1	0.000464684	1	2152	7	0.0003562022	64598	23	0.38355354388933	0.54462685666164	1003.7472968274	1	0	0	0	0	0	0	0	0	46.96	46.9599990844727	46.96	100	100	100	100	100	100	PASS
PEX11B	1	0.00325279	7	2152	4	0.0070627722	64598	456	-1.11855688006073	0.0336630615643963	62.0410224631824	0.6266769945776	0	0	0	0	0.00139405	0	0	0.00139405	37.09	37.0900001525879	37.09	100	100	100	100	100	100	PASS
PEX12	1	0.000465116	1	2152	7	0.0003872043	64598	25	0.264495595266829	0.573526163447534	1057.00871923381	1	0	0	0	0	0	0	0	0	34.1	34.0999984741211	34.1	100	100	100	94.93	94.9300003051758	94.93	PASS
PEX13	0	0	0	2152	2	0.0000309736	64598	2	0	1	1843	1	0.000262	0	0	0.000262	0	0	0	0	39.47	39.4700012207031	39.47	100	100	100	100	100	100	PASS
PEX14	0	0	0	0	0	0	0	0	0	0	0	1	0.002766	0	0	0.002766	0.001858734	0	0	0.001858734	40.13	40.1300010681152	40.13	100	100	100	98.65	98.6500015258789	98.65	PASS
PEX19	0	0	0	0	0	0	0	0	0	0	0	1	0	0	0	0	0.00185874	0	0	0.00185874	35.23	35.2299995422363	35.23	100	100	100	100	100	100	PASS
PEX2	0	0	0	2152	4	0.0001239239	64598	8	0	1	1843	1	0	0	0	0	0.003252784	0	0	0.003252784	36.83	36.8300018310547	36.83	100	100	100	100	100	100	PASS
PEX26	0	0	0	2152	3	0.0002013899	64598	13	0	1	1843	1	0.000131	0	0	0.000131	0.000929368	0	0	0.000929368	35.78	35.7799987792969	35.78	100	100	100	100	100	100	PASS
PEX3	0	0	0	0	0	0	0	0	0	0	0	1	0	0	0	0	0.000464684	0	0	0.000464684	36.53	36.5299987792969	36.53	100	100	100	100	100	100	PASS
PEX5	0	0	0	2152	2	0.0000464645	64598	3	0	1	1843	1	0	0	0	0	0.00139405	0	0	0.00139405	35.44	35.439998626709	35.44	100	100	100	99.66	99.6600036621094	99.66	PASS
PEX6	0	0	0	2152	13	0.0004028058	64598	26	0	1	1843	1	0	0	0	0	0.000464684	0	0	0.000464684	41.26	41.2599983215332	41.26	100	100	100	99.86	99.8600006103516	99.86	PASS
PEX7	0	0	0	2152	10	0.0014716038	64598	95	0	0.0784659727086314	144.612787702008	1	0.000131	0.000131	0	0.000262	0.000929368	0	0	0.000929368	37.54	37.5400009155273	37.54	100	100	100	100	100	100	PASS
PFAS	0	0	0	2152	2	0.0000779885	64598	5	0	1	1843	1	0	0	0	0	0	0	0	0	36.77	36.7700004577637	36.77	100	100	100	99.93	99.9300003051758	99.93	PASS
PFKM	0	0	0	2152	3	0.0000464621	64598	3	0	1	1843	1	0	0	0	0	0.00697026	0	0	0.00697026	34.12	34.1199989318848	34.12	100	100	100	100	100	100	PASS
PFN1	0	0	0	2152	1	0.0010844	64598	70	0	0.176173585500762	324.687918077904	1	0	0	0	0	0	0	0	0	43.5	43.5	43.5	100	100	100	100	100	100	PASS
PGAM2	1	0.000464684	1	2152	4	0.0003254241	64598	21	0.513928873894176	0.513770206664739	946.878490883114	1	0	0	0	0	0.00464684	0	0	0.00464684	34.76	34.7599983215332	34.76	100	100	100	100	100	100	PASS
PGAP1	0	0	0	2152	9	0.000154943	64598	10	0	1	1843	1	0.000262	0	0	0.000262	0	0	0	0	37.09	37.0900001525879	37.09	100	100	100	99.86	99.8600006103516	99.86	PASS
PGAP2	0	0	0	2152	2	0.0000309727	64598	2	0	1	1843	1	0.000142	0.006893	0	0.007035	0.000929368	0.000464684	0	0.001394052	37.17	37.1699981689453	37.17	100	100	100	100	100	100	PASS
PGAP3	0	0	0	2152	7	0.0003871734	64598	25	0	1	1843	1	0.000131	0	0	0.000131	0	0	0	0	41.01	41.0099983215332	41.01	100	100	100	100	100	100	PASS
PGM1	0	0	0	2152	6	0.0002477834	64598	16	0	1	1843	1	0.000655	0	0	0.000655	0	0	0	0	35.37	35.3699989318848	35.37	100	100	100	100	100	100	PASS
PGM3	0	0	0	2152	3	0.0000929205	64598	6	0	1	1843	1	0.000131	0	0	0.000131	0	0	0	0	35.56	35.560001373291	35.56	100	100	100	100	100	100	PASS
PHC1	0	0	0	0	0	0	0	0	0	0	0	1	0.000131	0.000131	0	0.000262	0.00139405	0	0	0.00139405	2021-01-31	31.1000003814697	2021-01-31	98.55	98.5500030517578	98.55	85.96	85.9599990844727	85.96	LOW_DP
PHF3	1	0.000929368	2	2152	13	0.0006507551	64598	42	0.514135257680289	0.653308482667384	1204.04753355599	1	0	0	0	0	0	0	0	0	34.3	34.2999992370606	34.3	100	100	100	99.71	99.7099990844727	99.71	PASS
PHGDH	0	0	0	2152	7	0.0001548615	64598	10	0	1	1843	1	0.000284	0	0	0.000284	0.00139405	0	0	0.00139405	38.02	38.0200004577637	38.02	100	100	100	100	100	100	PASS
PHKB	1	0.000464684	1	2152	8	0.0008055261	64598	52	-0.793681363891156	1	1843	1	0.001316	0	0	0.001316	0.015334576	0	0	0.015334576	35.29	35.2900009155273	35.29	100	100	100	100	100	100	PASS
PHKG2	0	0	0	2152	5	0.0003407225	64598	22	0	1	1843	1	0	0	0	0	0.008829	0	0	0.008829	39.61	39.6100006103516	39.61	100	100	100	98.97	98.9700012207031	98.97	PASS
PHYH	2	0.000929368	2	2152	9	0.0004647551	64598	30	0.999779274150168	0.276050523663517	508.761115111862	1	0	0	0	0	0	0	0	0	34.7	34.7000007629395	34.7	100	100	100	100	100	100	PASS
PI4KA	0	0	0	2152	1	0.0000154847	64598	1	0	1	1843	1	0.000917	0.002361	0	0.003278	0	0	0.000464684	0.000464684	38.88	38.8800010681152	38.88	99.87	99.870002746582	99.87	98.76	98.7600021362305	98.76	PASS
PIBF1	0	0	0	2152	6	0.0001394254	64598	9	0	1	1843	1	0.001075	0.005126	0	0.006201	0.004182154	0	0	0.004182154	35.95	35.9500007629395	35.95	100	100	100	99.12	99.120002746582	99.12	PASS
PIEZO1	0	0	0	2152	11	0.000867642	64598	56	0	0.265771867998346	489.817552720952	1	0.001049	0.00092	0	0.001969	0.000464684	0	0	0.000464684	46.68	46.6800003051758	46.68	100	100	100	100	100	100	PASS
PIEZO2	0	0	0	2152	3	0.0001084123	64598	7	0	1	1843	1	0.005114	0.005778	0	0.010892	0.003717472	0	0.000929368	0.00464684	37.64	37.6399993896484	37.64	100	100	100	100	100	100	PASS
PIGB	0	0	0	2152	2	0.0000309803	64598	2	0	1	1843	1	0	0	0	0	0	0	0	0	34.43	34.4300003051758	34.43	100	100	100	100	100	100	PASS
PIGC	0	0	0	2152	1	0.0000154828	64598	1	0	1	1843	1	0	0	0	0	0.00185874	0	0	0.00185874	37.37	37.3699989318848	37.37	100	100	100	100	100	100	PASS
PIGG	1	0.000464684	1	2152	3	0.0015952013	64598	103	-1.77941661462592	0.267630174220479	493.242411088343	1	0	0	0	0	0	0	0	0	35.42	35.4199981689453	35.42	100	100	100	99.4	99.4000015258789	99.4	PASS
PIGH	0	0	0	2152	1	0.0000154832	64598	1	0	1	1843	1	0	0	0	0	0.00743494	0	0	0.00743494	34.94	34.939998626709	34.94	100	100	100	100	100	100	PASS
PIGK	0	0	0	2152	1	0.000015489	64598	1	0	1	1843	1	0.000787	0.000131	0	0.000918	0	0	0	0	37.96	37.9599990844727	37.96	100	100	100	100	100	100	PASS
PIGL	0	0	0	2152	2	0.0000464583	64598	3	0	1	1843	1	0	0.000788	0	0.000788	0.003252786	0	0.000464684	0.00371747	37.61	37.6100006103516	37.61	100	100	100	100	100	100	PASS
PIGM	0	0	0	0	0	0	0	0	0	0	0	1	0	0	0	0	0.00185874	0	0	0.00185874	39.21	39.2099990844727	39.21	100	100	100	100	100	100	PASS
PIGN	2	0.001858734	4	2152	18	0.0009451138	64598	61	0.975760365542623	0.157599098817075	290.455139119868	1	0.000131	0.001313	0	0.001444	0.00139405	0	0	0.00139405	36.04	36.0400009155273	36.04	100	100	100	100	100	100	PASS
PIGO	1	0.000929368	2	2152	5	0.000526601	64598	34	0.819539709804037	0.324047858659002	597.22020350854	1	0	0	0	0	0	0	0	0	40.03	40.0299987792969	40.03	100	100	100	100	100	100	PASS
PIGP	0	0	0	2152	2	0.0001239099	64598	8	0	1	1843	1	0	0	0	0	0.000464684	0	0	0.000464684	39.99	39.9900016784668	39.99	100	100	100	100	100	100	PASS
PIGQ	1	0.000464684	1	2152	3	0.0001393778	64598	9	1.73724918279426	0.279443124762769	515.013678937783	1	0.000131	0	0	0.000131	0	0	0	0	41.01	41.0099983215332	41.01	100	100	100	99.7	99.6999969482422	99.7	PASS
PIGS	0	0	0	2152	1	0.0000154851	64598	1	0	1	1843	1	0	0	0	0	0	0	0	0	38.64	38.6399993896484	38.64	100	100	100	100	100	100	PASS
PIGT	1	0.00232342	5	2152	10	0.0005111561	64598	33	2.18441412816126	0.00718484778610364	13.241674469789	0.254481971069118	0.000788	0	0	0.000788	0	0	0	0	36.67	36.6699981689453	36.67	100	100	100	99.91	99.9100036621094	99.91	PASS
PIGU	0	0	0	2152	1	0.0000309722	64598	2	0	1	1843	1	0.000262	0.000393	0	0.000655	0.002788108	0.000464684	0	0.003252792	41.23	41.2299995422363	41.23	100	100	100	100	100	100	PASS
PIGV	3	0.004182158	9	2152	6	0.0004646057	64598	30	3.17016880828485	0.00000326789809262201	0.00602273618470237	0.000547521471336579	0	0	0	0	0	0	0	0	42.32	42.3199996948242	42.32	100	100	100	100	100	100	PASS
PIGW	1	0.000464684	1	2152	2	0.000092931	64598	6	2.32201813341195	0.204994629081207	377.805101396664	1	0.000131	0	0	0.000131	0	0	0	0	40.49	40.4900016784668	40.49	100	100	100	100	100	100	PASS
PIGY	0	0	0	0	0	0	0	0	0	0	0	1	0	0	0	0	0.001858734	0	0	0.001858734	38.75	38.75	38.75	100	100	100	100	100	100	PASS
PIK3C2A	0	0	0	0	0	0	0	0	0	0	0	1	0.000786	0	0	0.000786	0	0	0	0	37.45	37.4500007629395	37.45	100	100	100	100	100	100	PASS
PIK3C2G	0	0	0	2152	1	0.000046503	64598	3	0	1	1843	1	0	0	0	0	0	0	0	0	35.15	35.1500015258789	35.15	100	100	100	99.82	99.8199996948242	99.82	PASS
PIK3CD	0	0	0	2152	1	0.000015488	64598	1	0	1	1843	1	0	0	0	0	0	0	0	0	41.51	41.5099983215332	41.51	100	100	100	100	100	100	PASS
PIK3R1	0	0	0	0	0	0	0	0	0	0	0	1	0.000262	0	0	0.000262	0.00929368	0	0	0.00929368	34.84	34.8400001525879	34.84	100	100	100	97.45	97.4499969482422	97.45	PASS
PIK3R5	0	0	0	0	0	0	0	0	0	0	0	1	0	0.000263	0	0.000263	0.00929368	0	0	0.00929368	39.97	39.9700012207031	39.97	100	100	100	100	100	100	PASS
PINK1	0	0	0	2152	6	0.0003716709	64598	24	0	1	1843	1	0.00433	0	0	0.00433	0	0	0	0	43.18	43.1800003051758	43.18	100	100	100	100	100	100	PASS
PIP5K1C	0	0	0	2152	1	0.000247962	64598	16	0	1	1843	1	0.000525	0	0	0.000525	0.00836431	0	0	0.00836431	43.35	43.3499984741211	43.35	100	100	100	100	100	100	PASS
PISD	0	0	0	2152	1	0.000294227	64598	19	0	1	1843	1	0	0	0	0	0	0	0	0	43.53	43.5299987792969	43.53	100	100	100	100	100	100	PASS
PJVK	0	0	0	2152	3	0.0002478105	64598	16	0	1	1843	1	0	0	0	0	0.00325279	0	0	0.00325279	38.11	38.1100006103516	38.11	100	100	100	100	100	100	PASS
PKD1L1	0	0	0	2152	4	0.0009755852	64598	63	0	0.272245706282265	501.748836678214	1	0.000131	0	0	0.000131	0.005111524	0	0	0.005111524	36.09	36.0900001525879	36.09	100	100	100	99.54	99.5400009155274	99.54	PASS
PKD1L1-AS1	0	0	0	2152	1	0.0000154851	64598	1	0	0	0	NA	0	0	0	0	0	0	0	0	0	0	0	0	0	0	0	0	0	LOW_DP
PKDCC	0	0	0	0	0	0	0	0	0	0	0	1	0	0	0	0	0.000464684	0	0	0.000464684	34.76	34.7599983215332	34.76	100	100	100	99.56	99.5599975585938	99.56	PASS
PKHD1	3	0.002323418	5	2152	63	0.0032531591	64598	210	-0.485592652037935	0.564514876767695	1040.40091788286	1	0.006578	0.000132	0	0.00671	0.000929368	0.000464684	0	0.001394052	36.1	36.0999984741211	36.1	100	100	100	99.73	99.7300033569336	99.73	PASS
PKLR	0	0	0	2152	11	0.0012083012	64598	78	0	0.184856407034492	340.690358164569	1	0	0	0	0	0	0	0	0	33.28	33.2799987792969	33.28	100	100	100	95.7	95.6999969482422	95.7	PASS
PKP1	0	0	0	0	0	0	0	0	0	0	0	1	0	0	0	0	0.00185874	0	0	0.00185874	39.9	39.9000015258789	39.9	100	100	100	100	100	100	PASS
PLA2G4A	0	0	0	0	0	0	0	0	0	0	0	1	0	0	0	0	0.00185874	0	0	0.00185874	35.18	35.1800003051758	35.18	100	100	100	100	100	100	PASS
PLA2G6	0	0	0	2152	14	0.0003717242	64598	24	0	1	1843	1	0.000131	0	0	0.000131	0	0	0	0	41.07	41.0699996948242	41.07	100	100	100	100	100	100	PASS
PLA2G7	0	0	0	2152	2	0.0001084551	64598	7	0	1	1843	1	0.000131	0	0	0.000131	0.000464684	0	0	0.000464684	38.17	38.1699981689453	38.17	100	100	100	100	100	100	PASS
PLAA	0	0	0	0	0	0	0	0	0	0	0	1	0.000131	0	0	0.000131	0	0	0	0	37.75	37.75	37.75	100	100	100	99.64	99.6399993896484	99.64	PASS
PLCB1	0	0	0	0	0	0	0	0	0	0	0	1	0.021022	0.004464	0	0.025486	0.007434942	0	0	0.007434942	37.64	37.6399993896484	37.64	100	100	100	100	100	100	PASS
PLCB3	0	0	0	0	0	0	0	0	0	0	0	1	0	0	0	0	0	0	0	0	41.13	41.1300010681152	41.13	100	100	100	99.97	99.9700012207031	99.97	PASS
PLCE1	0	0	0	2152	2	0.0000309779	64598	2	0	1	1843	1	0.009051	0	0	0.009051	0.001394052	0.000464684	0.000464684	0.00232342	35.97	35.9700012207031	35.97	100	100	100	100	100	100	PASS
PLCZ1	0	0	0	0	0	0	0	0	0	0	0	1	0	0	0	0	0.00139405	0	0	0.00139405	34	34	34	100	100	100	98.98	98.9800033569336	98.98	PASS
PLD1	1	0.000464684	1	2152	2	0.0000309746	64598	2	3.9070924139128	0.0936357732577362	172.570730114008	1	0.000262	0.002755	0	0.003017	0.008364312	0	0	0.008364312	36.39	36.3899993896484	36.39	100	100	100	100	100	100	PASS
PLEC	0	0	0	2152	3	0.0000929157	64598	6	0	1	1843	1	0	0	0	0	0.000929368	0	0	0.000929368	47.16	47.1599998474121	47.16	100	100	100	100	100	100	PASS
PLEKHG2	1	0.000929368	2	2152	2	0.0002013689	64598	13	2.20640908430588	0.0826570463912132	152.336936499006	1	0.000282	0	0	0.000282	0.000464684	0	0	0.000464684	38.29	38.2900009155273	38.29	100	100	100	100	100	100	PASS
PLEKHG5	0	0	0	2152	3	0.0002014126	64598	13	0	1	1843	1	0	0	0	0	0.000464684	0	0	0.000464684	43.29	43.2900009155274	43.29	100	100	100	100	100	100	PASS
PLEKHM1	0	0	0	0	0	0	0	0	0	0	0	1	0.000134	0	0	0.000134	0	0	0	0	41.99	41.9900016784668	41.99	100	100	100	98.74	98.7399978637695	98.74	PASS
PLG	1	0.000464684	1	2152	3	0.0046621842	64598	301	-3.32668412963798	0.000919185879503214	1.69405957592442	0.0513351386643764	0.000278	0	0	0.000278	0.00511152	0	0	0.00511152	34.5	34.5	34.5	100	100	100	100	100	100	PASS
PLK4	0	0	0	2152	1	0.0000154871	64598	1	0	1	1843	1	0	0	0	0	0.00139405	0	0	0.00139405	36.36	36.3600006103516	36.36	100	100	100	100	100	100	PASS
PLOD1	0	0	0	2152	8	0.0002478617	64598	16	0	1	1843	1	0.000131	0.000262	0	0.000393	0	0	0	0	33.86	33.8600006103516	33.86	100	100	100	92.44	92.4400024414063	92.44	PASS
PLOD2	0	0	0	2152	4	0.0000930373	64598	6	0	1	1843	1	0.000666	0	0	0.000666	0.012081784	0	0	0.012081784	35.74	35.7400016784668	35.74	100	100	100	99.9	99.9000015258789	99.9	PASS
PLOD3	0	0	0	2152	1	0.0000309645	64598	2	0	1	1843	1	0	0	0	0	0.00464684	0	0	0.00464684	39.64	39.6399993896484	39.64	100	100	100	99.9	99.9000015258789	99.9	PASS
PLPBP	0	0	0	2152	5	0.0001393837	64598	9	0	1	1843	1	0	0	0	0	0.003717468	0	0	0.003717468	35.44	35.439998626709	35.44	100	100	100	100	100	100	PASS
PLVAP	0	0	0	0	0	0	0	0	0	0	0	1	0.000131	0	0	0.000131	0.012081778	0	0	0.012081778	44.85	44.8499984741211	44.85	100	100	100	100	100	100	PASS
PMFBP1	0	0	0	2152	2	0.0000619478	64598	4	0	1	1843	1	0	0	0	0	0.008829	0	0.000464684	0.009293684	34.78	34.7799987792969	34.78	100	100	100	100	100	100	PASS
PMM2	4	0.003717476	8	2152	28	0.0070613707	64598	456	-0.925624827477538	0.0647568338894088	119.34684485818	0.932397225454534	0.000393	0	0	0.000393	0	0.008364314	0	0.008364314	40.89	40.8899993896484	40.89	100	100	100	100	100	100	PASS
PMPCA	0	0	0	2152	2	0.0000929138	64598	6	0	1	1843	1	0	0	0	0	0	0	0	0	45.49	45.4900016784668	45.49	100	100	100	100	100	100	PASS
PMPCB	0	0	0	2152	5	0.0002477772	64598	16	0	1	1843	1	0.000131	0	0	0.000131	0.005111524	0	0	0.005111524	37.58	37.5800018310547	37.58	100	100	100	99.62	99.620002746582	99.62	PASS
PMS2	2	0.0009298	2	2152	17	0.000666486	64598	43	0.480345855032808	0	0	NA	0	0.000135	0	0.000135	0.000465116	0	0	0.000465116	21.63	21.6299991607666	21.63	64.39	64.3899993896484	64.39	50.35	50.3499984741211	50.35	LOW_DP
PNKP	1	0.000464684	1	2152	18	0.0007437992	64598	48	-0.678663225420368	1	1843	1	0	0	0	0	0.000464684	0	0	0.000464684	38.3	38.2999992370605	38.3	100	100	100	100	100	100	PASS
PNLIP	0	0	0	0	0	0	0	0	0	0	0	1	0.000656	0	0	0.000656	0	0	0	0	33.29	33.2900009155273	33.29	100	100	100	94.57	94.5699996948242	94.57	PASS
PNP	0	0	0	2152	6	0.0002477546	64598	16	0	1	1843	1	0	0	0	0	0	0	0	0	35.3	35.2999992370606	35.3	100	100	100	100	100	100	PASS
PNPLA1	0	0	0	2152	4	0.0001111531	64598	7	0	1	1843	1	0	0	0	0	0.000464684	0	0	0.000464684	33.44	33.439998626709	33.44	100	100	100	91.73	91.7300033569336	91.73	PASS
PNPLA2	0	0	0	2152	3	0.0000930286	64598	6	0	1	1843	1	0	0	0	0	0	0	0	0	43.49	43.4900016784668	43.49	100	100	100	100	100	100	PASS
PNPLA6	1	0.000929368	2	2152	15	0.0006816448	64598	44	0.447229813352849	0.660548191652714	1217.39031721595	1	0.000526	0	0	0.000526	0.00836431	0	0	0.00836431	43.21	43.2099990844727	43.21	100	100	100	100	100	100	PASS
PNPLA8	0	0	0	0	0	0	0	0	0	0	0	1	0	0	0	0	0.00464684	0	0	0.00464684	37.48	37.4799995422363	37.48	100	100	100	99.94	99.9400024414063	99.94	PASS
PNPO	0	0	0	2152	6	0.0003252542	64598	21	0	1	1843	1	0.000131	0	0	0.000131	0.000464684	0	0	0.000464684	38.34	38.3400001525879	38.34	100	100	100	100	100	100	PASS
PNPT1	0	0	0	2152	3	0.0002013507	64598	13	0	1	1843	1	0	0	0	0	0	0	0	0	37.77	37.7700004577637	37.77	100	100	100	100	100	100	PASS
POC1A	0	0	0	2152	1	0.000216772	64598	14	0	1	1843	1	0.000131	0	0	0.000131	0.007899624	0	0	0.007899624	41.04	41.0400009155273	41.04	100	100	100	100	100	100	PASS
POC1B	0	0	0	2152	2	0.0000464589	64598	3	0	1	1843	1	0.001442	0	0	0.001442	0.00557621	0	0	0.00557621	38.05	38.0499992370606	38.05	100	100	100	100	100	100	PASS
POGLUT1	0	0	0	2152	5	0.0000929276	64598	6	0	1	1843	1	0	0.000262	0	0.000262	0.012081784	0	0	0.012081784	37.02	37.0200004577637	37.02	100	100	100	100	100	100	PASS
POGZ	1	0.000464684	1	2152	0	0	64598	0	0	0.0322397003745318	59.4177677902621	0.612554307116105	0	0	0	0	0	0	0	0	34.67	34.6699981689453	34.67	100	100	100	98.87	98.870002746582	98.87	PASS
POLE	0	0	0	2152	1	0.0000929195	64598	6	0	1	1843	1	0.000525	0.001187	0	0.001712	0	0	0	0	42.15	42.1500015258789	42.15	100	100	100	99.73	99.7300033569336	99.73	PASS
POLG	3	0.001394052	3	2152	28	0.0041034508	64598	265	-1.55755327895902	0.0538044197661363	99.1615456289892	0.869838119552537	0	0	0	0	0.00139405	0	0	0.00139405	39.01	39.0099983215332	39.01	100	100	100	100	100	100	PASS
POLG2	0	0	0	2152	1	0.0000154904	64598	1	0	1	1843	1	0.000525	0	0	0.000525	0	0	0	0	39.03	39.0299987792969	39.03	100	100	100	100	100	100	PASS
POLH	0	0	0	2152	4	0.0001238922	64598	8	0	1	1843	1	0.000131	0	0	0.000131	0.000464684	0	0	0.000464684	39.51	39.5099983215332	39.51	100	100	100	99.81	99.8099975585938	99.81	PASS
POLR1C	2	0.000929368	2	2152	19	0.0011461231	64598	74	-0.302440129954729	1	1843	1	0	0	0	0	0.000464684	0	0	0.000464684	37.01	37.0099983215332	37.01	100	100	100	97.71	97.7099990844727	97.71	PASS
POLR3A	1	0.000464684	1	2152	21	0.000557523	64598	36	-0.262781352235934	1	1843	1	0	0	0	0	0.000464684	0	0	0.000464684	37.27	37.2700004577637	37.27	100	100	100	100	100	100	PASS
POLR3B	1	0.0027881	6	2152	10	0.0009603359	64598	62	1.53767129123422	0.0223432962528866	41.1786949940701	0.527931987103462	0.000262	0	0	0.000262	0	0	0	0	35.83	35.8300018310547	35.83	100	100	100	99.74	99.7399978637695	99.74	PASS
POLR3GL	0	0	0	2152	1	0.0000309741	64598	2	0	1	1843	1	0	0	0	0	0.00139405	0	0	0.00139405	39.61	39.6100006103516	39.61	100	100	100	100	100	100	PASS
POMC	0	0	0	2152	3	0.0000929263	64598	6	0	1	1843	1	0	0	0	0	0	0	0	0	46.29	46.2900009155274	46.29	100	100	100	100	100	100	PASS
POMGNT1	0	0	0	0	0	0	0	0	0	0	0	1	0	0	0	0	0	0	0	0	39.59	39.5900001525879	39.59	100	100	100	100	100	100	PASS
POMGNT2	0	0	0	2152	1	0.0000154923	64598	1	0	1	1843	1	0	0	0	0	0.007899624	0	0	0.007899624	42.71	42.7099990844727	42.71	100	100	100	100	100	100	PASS
POMK	1	0.000464684	1	2152	3	0.0000619368	64598	4	2.90738121843577	0.151138487767055	278.548232954682	1	0.000131	0	0	0.000131	0.003252784	0	0	0.003252784	35.49	35.4900016784668	35.49	100	100	100	100	100	100	PASS
POMP	1	0.000464684	1	2152	1	0.00013941	64598	9	1.73691592014415	0.279443124762769	515.013678937783	1	0.000786	0	0	0.000786	0	0	0	0	37.81	37.810001373291	37.81	100	100	100	100	100	100	PASS
POMT1	0	0	0	2152	16	0.0008827351	64598	57	0	0.265898281129845	490.050532122304	1	0	0	0	0	0.000929368	0	0	0.000929368	40.9	40.9000015258789	40.9	100	100	100	100	100	100	PASS
POMT2	1	0.000465116	1	2152	11	0.0003277888	64598	21	0.504824008674176	0.513770206664739	946.878490883114	1	0.000131	0	0	0.000131	0.00743494	0	0	0.00743494	36.68	36.6800003051758	36.68	100	100	100	98.71	98.7099990844727	98.71	PASS
POP1	0	0	0	2152	2	0.0003406979	64598	22	0	1	1843	1	0.000395	0	0	0.000395	0.003717468	0	0	0.003717468	35.91	35.9099998474121	35.91	100	100	100	100	100	100	PASS
POPDC3	0	0	0	2152	1	0.0000464713	64598	3	0	1	1843	1	0	0	0	0	0	0	0	0	36.7	36.7000007629395	36.7	100	100	100	100	100	100	PASS
POR	1	0.000464684	1	2152	6	0.0006351201	64598	41	-0.450779457737094	1	1843	1	0.000262	0	0	0.000262	0.00464684	0	0	0.00464684	46.66	46.6599998474121	46.66	100	100	100	100	100	100	PASS
PPA2	2	0.001394052	3	2152	5	0.0020759547	64598	134	-0.574490585918653	0.805662915636512	1484.83675351809	1	0	0	0	0	0.00139405	0	0	0.00139405	42.55	42.5499992370605	42.55	100	100	100	100	100	100	PASS
PPCS	0	0	0	2152	1	0.0000464468	64598	3	0	1	1843	1	0	0	0	0	0	0	0	0	36.46	36.4599990844727	36.46	100	100	100	99.7	99.6999969482422	99.7	PASS
PPIB	0	0	0	2152	1	0.0000464526	64598	3	0	1	1843	1	0	0	0	0	0.00232342	0	0	0.00232342	35.37	35.3699989318848	35.37	100	100	100	98.25	98.25	98.25	PASS
PPIP5K2	1	0.000465116	1	2152	1	0.000356722	64598	23	0.382790376044349	0.54462685666164	1003.7472968274	1	0	0.000131	0	0.000131	0.01022305	0	0	0.01022305	35.51	35.5099983215332	35.51	100	100	100	99.87	99.870002746582	99.87	PASS
PPP1R15B	0	0	0	0	0	0	0	0	0	0	0	1	0	0	0	0	0.00185874	0	0	0.00185874	37.39	37.3899993896484	37.39	100	100	100	99.83	99.8300018310547	99.83	PASS
PPP2R3C	0	0	0	2152	1	0.0000154866	64598	1	0	1	1843	1	0.000264	0	0	0.000264	0.000464684	0	0	0.000464684	38.21	38.2099990844727	38.21	100	100	100	100	100	100	PASS
PPT1	0	0	0	2152	17	0.0013167913	64598	85	0	0.118425318360336	218.257861738099	1	0.000131	0	0	0.000131	0.000464684	0	0	0.000464684	35.84	35.8400001525879	35.84	100	100	100	100	100	100	PASS
PRDM12	1	0.000466418	1	2152	1	0.000359348	64598	23	0.376241809522313	0.54462685666164	1003.7472968274	1	0.000131	0	0	0.000131	0.000929368	0	0	0.000929368	36.3	36.2999992370606	36.3	100	100	100	100	100	100	PASS
PRDM5	0	0	0	2152	3	0.0000464699	64598	3	0	1	1843	1	0.000655	0	0	0.000655	0.00139405	0	0	0.00139405	36.84	36.8400001525879	36.84	100	100	100	98.95	98.9499969482422	98.95	PASS
PRDM8	0	0	0	0	0	0	0	0	0	0	0	1	0	0	0	0	0.007899624	0	0	0.007899624	35.55	35.5499992370606	35.55	100	100	100	96.87	96.870002746582	96.87	PASS
PRDX1	0	0	0	2152	1	0.0000154842	64598	1	0	1	1843	1	0	0	0	0	0	0	0	0	39.25	39.25	39.25	100	100	100	100	100	100	PASS
PREPL	1	0.000464684	1	2152	6	0.0003098975	64598	20	0.584458854341145	0.497566813579624	917.015637427247	1	0.000394	0	0	0.000394	0.000464684	0	0	0.000464684	37.66	37.6599998474121	37.66	100	100	100	100	100	100	PASS
PRF1	0	0	0	2152	8	0.0004955482	64598	32	0	0.626368259711495	1154.39670264828	1	0.000262	0	0	0.000262	0.000464684	0	0	0.000464684	40.17	40.1699981689453	40.17	100	100	100	98.78	98.7799987792969	98.78	PASS
PRG4	0	0	0	2152	4	0.0001085363	64598	7	0	1	1843	1	0	0	0	0	0.00185874	0	0	0.00185874	31.71	31.7099990844727	31.71	100	100	100	90.3	90.3000030517578	90.3	PASS
PRICKLE1	0	0	0	2152	1	0.0000309703	64598	2	0	1	1843	1	0	0	0	0	0.00697026	0	0	0.00697026	35.37	35.3699989318848	35.37	100	100	100	100	100	100	PASS
PRKAG3	0	0	0	0	0	0	0	0	0	0	0	1	0.000262	0	0	0.000262	0	0	0	0	37.99	37.9900016784668	37.99	100	100	100	100	100	100	PASS
PRKAR1A	0	0	0	2152	3	0.0001858659	64598	12	0	1	1843	1	0	0	0	0	0	0	0	0	34.78	34.7799987792969	34.78	100	100	100	99.3	99.3000030517578	99.3	PASS
PRKAR1B	0	0	0	2152	1	0.0000155145	64598	1	0	1	1843	1	0	0	0	0	0	0	0	0	45.3	45.2999992370606	45.3	100	100	100	100	100	100	PASS
PRKCD	0	0	0	2152	1	0.0000154938	64598	1	0	1	1843	1	0	0	0	0	0.007899624	0	0	0.007899624	39.3	39.2999992370606	39.3	100	100	100	100	100	100	PASS
PRKDC	1	0.00304878	7	2152	1	0.00216969	64598	140	0.490743120557359	0.245225333918984	451.950290412688	1	0.001048	0	0	0.001048	0.006505572	0	0.000464684	0.006970256	36.97	36.9700012207031	36.97	100	100	100	99.88	99.879997253418	99.88	PASS
PRKN	3	0.002323418	5	2152	10	0.0046310185	64598	299	-0.995080791379423	0.141075352052488	260.001873832735	1	0.017319	0.003411	0	0.02073	0.019981398	0.000929368	0.000929368	0.021840134	35.4	35.4000015258789	35.4	100	100	100	100	100	100	PASS
PRKRA	0	0	0	2152	2	0.001334006	64598	86	0	0.11911130382151	219.522132943042	1	0	0	0	0	0.0116171	0	0	0.0116171	54.01	54.0099983215332	54.01	100	100	100	100	100	100	PASS
PRMT7	0	0	0	2152	5	0.0002477952	64598	16	0	1	1843	1	0.000131	0	0	0.000131	0.008829	0	0	0.008829	39.12	39.1199989318848	39.12	100	100	100	100	100	100	PASS
PROC	0	0	0	2152	15	0.0004955003	64598	32	0	0.626368259711495	1154.39670264828	1	0	0	0	0	0.004182158	0	0	0.004182158	39.76	39.7599983215332	39.76	100	100	100	99.94	99.9400024414063	99.94	PASS
PRODH	0	0	0	0	0	0	0	0	0	0	0	1	0.004506	0.000922	0	0.005428	0.000464684	0	0	0.000464684	2028-02-01	2.27999997138977	2028-02-01	1978-04-01	4.78000020980835	1978-04-01	0	0	0	LOW_DP
PROM1	2	0.000929368	2	2152	15	0.0011173198	64598	72	-0.265720298100817	1	1843	1	0.000131	0	0	0.000131	0.000464684	0	0	0.000464684	36.69	36.689998626709	36.69	100	100	100	99.9	99.9000015258789	99.9	PASS
PROP1	2	0.00371747	8	2152	5	0.000619838	64598	40	2.5843579906664	0.000137685979679738	0.253755260549756	0.0115343300249889	0.000131	0	0	0.000131	0	0	0	0	30.83	30.8299999237061	30.83	100	100	100	93.92	93.9199981689453	93.92	PASS
PROS1	0	0	0	2152	4	0.0001239057	64598	8	0	1	1843	1	0	0	0	0	0.007899624	0	0	0.007899624	36.85	36.8499984741211	36.85	100	100	100	100	100	100	PASS
PRSS12	0	0	0	2152	1	0.0000619655	64598	4	0	1	1843	1	0	0	0	0	0.00139405	0	0	0.00139405	38.12	38.1199989318848	38.12	100	100	100	99.98	99.9800033569336	99.98	PASS
PRSS56	1	0.000465116	1	2152	2	0.000295905	64598	19	0.652456495044969	0.480823708850821	886.158095412063	1	0	0	0	0	0	0	0	0	41.86	41.8600006103516	41.86	100	100	100	100	100	100	PASS
PRUNE1	0	0	0	2152	4	0.0001084262	64598	7	0	1	1843	1	0	0.000131	0	0.000131	0	0	0	0	39.96	39.9599990844727	39.96	100	100	100	100	100	100	PASS
PRX	0	0	0	2152	9	0.0002568056	64598	17	0	1	1843	1	0	0	0	0	0.000464684	0	0	0.000464684	41.1	41.0999984741211	41.1	100	100	100	100	100	100	PASS
PSAP	0	0	0	2152	1	0.0000154842	64598	1	0	1	1843	1	0	0	0	0	0.000464684	0	0	0.000464684	38.91	38.9099998474121	38.91	100	100	100	99.93	99.9300003051758	99.93	PASS
PSAT1	1	0.000464684	1	2152	3	0.0004026413	64598	26	0.206754809870673	0.587280909809576	1082.35871677905	1	0.000131	0	0	0.000131	0.000929368	0	0	0.000929368	37.53	37.5299987792969	37.53	100	100	100	100	100	100	PASS
PSMB10	0	0	0	0	0	0	0	0	0	0	0	1	0	0	0	0	0.008829	0	0	0.008829	35.59	35.5900001525879	35.59	100	100	100	100	100	100	PASS
PSMB4	0	0	0	2152	1	0.00207501	64598	134	0	0.0241030706786869	44.4219592608199	0.544723051652785	0	0	0	0	0	0	0	0	37.03	37.0299987792969	37.03	100	100	100	100	100	100	PASS
PSMB8	0	0	0	2152	3	0.000092907	64598	6	0	1	1843	1	0	0	0	0	0.000464684	0	0	0.000464684	38.61	38.6100006103516	38.61	100	100	100	100	100	100	PASS
PSMB9	0	0	0	0	0	0	0	0	0	0	0	1	0	0	0	0	0.000464684	0	0	0.000464684	34.99	34.9900016784668	34.99	100	100	100	100	100	100	PASS
PSMG2	0	0	0	2152	1	0.0000154947	64598	1	0	1	1843	1	0.000393	0	0	0.000393	0	0	0	0	39.12	39.1199989318848	39.12	100	100	100	100	100	100	PASS
PSPH	0	0	0	0	0	0	0	0	0	0	0	1	0	0	0	0	0.00464684	0	0	0.00464684	39.47	39.4700012207031	39.47	100	100	100	98.87	98.870002746582	98.87	PASS
PTCD3	0	0	0	0	0	0	0	0	0	0	0	1	0	0	0	0	0.001858736	0	0	0.001858736	36.21	36.2099990844727	36.21	100	100	100	99.91	99.9100036621094	99.91	PASS
PTF1A	0	0	0	2152	1	0.0000156534	64598	1	0	1	1843	1	0.000131	0	0	0.000131	0	0	0	0	40.94	40.939998626709	40.94	100	100	100	100	100	100	PASS
PTGER2	0	0	0	0	0	0	0	0	0	0	0	1	0	0	0	0	0.00743494	0	0	0.00743494	44.93	44.9300003051758	44.93	100	100	100	100	100	100	PASS
PTH1R	0	0	0	2152	1	0.000015489	64598	1	0	1	1843	1	0	0	0	0	0.007899624	0	0	0.007899624	38.41	38.4099998474121	38.41	100	100	100	100	100	100	PASS
PTPN14	0	0	0	0	0	0	0	0	0	0	0	1	0.000131	0	0	0.000131	0.004182154	0	0	0.004182154	37.99	37.9900016784668	37.99	100	100	100	99.06	99.0599975585938	99.06	PASS
PTPN22	0	0	0	0	0	0	0	0	0	0	0	1	0	0.000262	0	0.000262	0.00185874	0	0	0.00185874	35.79	35.7900009155273	35.79	100	100	100	100	100	100	PASS
PTPN23	1	0.000464684	1	2152	7	0.000913898	64598	59	-0.975783184494145	1	1843	1	0.000393	0	0	0.000393	0.007899624	0	0	0.007899624	41.39	41.3899993896484	41.39	100	100	100	100	100	100	PASS
PTPRC	0	0	0	2152	3	0.0000774574	64598	5	0	1	1843	1	0.000131	0	0	0.000131	0.00185874	0	0	0.00185874	37.13	37.1300010681152	37.13	100	100	100	99.3	99.3000030517578	99.3	PASS
PTPRF	0	0	0	0	0	0	0	0	0	0	0	1	0.004724	0	0	0.004724	0	0	0	0	42.46	42.4599990844727	42.46	100	100	100	100	100	100	PASS
PTPRO	0	0	0	0	0	0	0	0	0	0	0	1	0.005387	0	0	0.005387	0.00975836	0	0.000929368	0.010687728	36.21	36.2099990844727	36.21	100	100	100	100	100	100	PASS
PTPRQ	0	0	0	2152	2	0.0000464713	64598	3	0	1	1843	1	0.000671	0	0	0.000671	0.006505578	0	0	0.006505578	34.97	34.9700012207031	34.97	100	100	100	99.95	99.9499969482422	99.95	PASS
PTRH2	0	0	0	0	0	0	0	0	0	0	0	1	0	0	0	0	0.000464684	0	0	0.000464684	34.45	34.4500007629395	34.45	100	100	100	100	100	100	PASS
PTS	0	0	0	2152	12	0.00027903	64598	18	0	1	1843	1	0	0	0	0	0	0	0	0	39.37	39.3699989318848	39.37	100	100	100	100	100	100	PASS
PUS1	0	0	0	2152	5	0.0001548476	64598	10	0	1	1843	1	0	0	0	0	0	0	0	0	42.81	42.810001373291	42.81	100	100	100	100	100	100	PASS
PUS3	0	0	0	2152	6	0.0004800388	64598	31	0	0.625986160670934	1153.69249411653	1	0	0	0	0	0	0	0	0	36.25	36.25	36.25	100	100	100	97.4	97.4000015258789	97.4	PASS
PUS7	0	0	0	2152	2	0.0000619641	64598	4	0	1	1843	1	0.000131	0	0	0.000131	0.00464684	0	0	0.00464684	36.83	36.8300018310547	36.83	100	100	100	99.46	99.4599990844727	99.46	PASS
PXDN	0	0	0	2152	2	0.000030988	64598	2	0	1	1843	1	0.000131	0.000397	0	0.000528	0.000929368	0	0	0.000929368	40.05	40.0499992370605	40.05	100	100	100	99.78	99.7799987792969	99.78	PASS
PYCR1	0	0	0	2152	11	0.0007278726	64598	47	0	0.40711540692607	750.313694964746	1	0	0	0	0	0	0	0	0	47.02	47.0200004577637	47.02	100	100	100	100	100	100	PASS
PYCR2	0	0	0	2152	3	0.0000619459	64598	4	0	1	1843	1	0	0	0	0	0	0	0	0	35.89	35.8899993896484	35.89	100	100	100	92.49	92.4899978637695	92.49	PASS
PYGL	0	0	0	2152	10	0.0004181484	64598	27	0	1	1843	1	0	0	0	0	0.00743494	0	0	0.00743494	37.2	37.2000007629395	37.2	100	100	100	100	100	100	PASS
PYGM	1	0.000464684	1	2152	25	0.0043360702	64598	280	-3.22206623784944	0.00191588461528413	3.53097534596866	0.0861213499016746	0.000393	0	0	0.000393	0	0	0	0	42.36	42.3600006103516	42.36	100	100	100	100	100	100	PASS
PYROXD1	0	0	0	2152	3	0.0001703772	64598	11	0	1	1843	1	0.000266	0	0	0.000266	0.001858734	0.000464684	0	0.002323418	37.51	37.5099983215332	37.51	100	100	100	99.69	99.6900024414063	99.69	PASS
QARS1	0	0	0	2152	10	0.0002477917	64598	16	0	1	1843	1	0	0	0	0	0.007899624	0	0	0.007899624	39.03	39.0900001525879	39.15	100	100	100	99.93	99.9300003051758	99.93	PASS
QDPR	0	0	0	2152	6	0.0001240183	64598	8	0	1	1843	1	0	0.000131	0	0.000131	0.000464684	0	0	0.000464684	41.19	41.189998626709	41.19	100	100	100	100	100	100	PASS
QRICH2	0	0	0	0	0	0	0	0	0	0	0	1	0.000131	0	0	0.000131	0.00789963	0	0	0.00789963	38.27	38.2700004577637	38.27	100	100	100	99.98	99.9800033569336	99.98	PASS
QRSL1	0	0	0	0	0	0	0	0	0	0	0	1	0.000262	0	0	0.000262	0.00139405	0	0	0.00139405	34.33	34.3300018310547	34.33	100	100	100	99.76	99.7600021362305	99.76	PASS
RAB18	0	0	0	2152	1	0.0000154986	64598	1	0	1	1843	1	0	0	0	0	0	0	0	0	36.74	36.7400016784668	36.74	100	100	100	99.94	99.9400024414063	99.94	PASS
RAB23	0	0	0	2152	2	0.0006661665	64598	43	0	0.404930193891774	746.286347342539	1	0.000657	0	0	0.000657	0.000464684	0	0	0.000464684	39.42	39.4199981689453	39.42	100	100	100	100	100	100	PASS
RAB27A	0	0	0	2152	4	0.000247749	64598	16	0	1	1843	1	0	0	0	0	0.000464684	0	0	0.000464684	36.96	36.9599990844727	36.96	100	100	100	100	100	100	PASS
RAB28	0	0	0	2152	1	0.0000309933	64598	2	0	1	1843	1	0.003017	0	0	0.003017	0.003252792	0	0	0.003252792	41.52	41.5200004577637	41.52	100	100	100	100	100	100	PASS
RAB33B	0	0	0	0	0	0	0	0	0	0	0	1	0	0	0	0	0.00139405	0	0	0.00139405	38	38	38	100	100	100	100	100	100	PASS
RAB3GAP1	0	0	0	2152	3	0.0000464847	64598	3	0	1	1843	1	0.000393	0	0	0.000393	0.004182158	0	0	0.004182158	35.74	35.7400016784668	35.74	100	100	100	99.21	99.2099990844727	99.21	PASS
RAB3GAP2	0	0	0	2152	1	0.0000309761	64598	2	0	1	1843	1	0.000264	0.000131	0	0.000395	0	0	0	0	35.33	35.3300018310547	35.33	100	100	100	99.21	99.2099990844727	99.21	PASS
RAD21	1	0.000464684	1	2152	0	0	64598	0	0	0.0322397003745318	59.4177677902621	0.612554307116105	0	0	0	0	0.0027881	0	0	0.0027881	35.68	35.6800003051758	35.68	100	100	100	98.56	98.5599975585938	98.56	PASS
RAD50	1	0.000464684	1	2152	37	0.0010392474	64598	67	-1.16121726267806	0.727598604724893	1340.96422850798	1	0.000524	0	0	0.000524	0.00697026	0	0	0.00697026	36.54	36.5400009155273	36.54	100	100	100	100	100	100	PASS
RAD51C	1	0.000464684	1	2152	10	0.0002478343	64598	16	0.906874102091217	0.427173431482454	787.280634222162	1	0.000394	0	0	0.000394	0.000464684	0	0	0.000464684	38.1	38.0999984741211	38.1	100	100	100	100	100	100	PASS
RAG1	1	0.000465116	1	2152	25	0.0008517573	64598	55	-0.872851837560928	1	1843	1	0	0	0	0	0.00139405	0	0	0.00139405	39.23	39.2299995422363	39.23	100	100	100	100	100	100	PASS
RAG2	1	0.000465116	1	2152	6	0.0001084046	64598	7	2.10116459268622	0.230628052185011	425.047500176976	1	0	0	0	0	0.00139405	0	0	0.00139405	36.34	36.3400001525879	36.34	100	100	100	100	100	100	PASS
RALGAPA1	0	0	0	0	0	0	0	0	0	0	0	1	0.000802	0	0	0.000802	0.001394052	0	0.00139405	0.002788102	36.01	36.0099983215332	36.01	100	100	100	98.84	98.8399963378906	98.84	PASS
RAPSN	0	0	0	2152	5	0.0001858146	64598	12	0	1	1843	1	0	0	0	0	0	0	0	0	39.27	39.2700004577637	39.27	100	100	100	100	100	100	PASS
RARS1	0	0	0	2152	9	0.0009761256	64598	63	0	0.272245706282265	501.748836678214	1	0	0	0	0	0.000464684	0	0	0.000464684	36.29	36.2900009155273	36.29	100	100	100	100	100	100	PASS
RARS2	1	0.000929368	2	2152	16	0.0006350539	64598	41	0.549370925457324	0.649898645077567	1197.76320287796	1	0.000524	0	0	0.000524	0	0	0	0	37.32	37.3199996948242	37.32	100	100	100	99.87	99.870002746582	99.87	PASS
RASGRP2	0	0	0	2152	2	0.0000309885	64598	2	0	1	1843	1	0	0	0	0	0	0	0	0	40.05	40.0499992370605	40.05	100	100	100	99.21	99.2099990844727	99.21	PASS
RAX	0	0	0	2152	1	0.0000464526	64598	3	0	1	1843	1	0	0	0	0	0	0	0	0	42.5	42.5	42.5	100	100	100	100	100	100	PASS
RB1	0	0	0	2152	1	0.0000309751	64598	2	0	1	1843	1	0	0	0	0	0	0	0	0	37.58	37.5800018310547	37.58	100	100	100	100	100	100	PASS
RBBP8	1	0.00139405	3	2152	3	0.0005110876	64598	33	1.4476398126433	0.109089978508236	201.05283039068	1	0.000918	0	0	0.000918	0	0	0	0	38.57	38.5699996948242	38.57	100	100	100	100	100	100	PASS
RBCK1	0	0	0	0	0	0	0	0	0	0	0	1	0	0	0	0	0	0	0	0	42.49	42.4900016784668	42.49	100	100	100	100	100	100	PASS
RBM28	0	0	0	0	0	0	0	0	0	0	0	1	0	0	0	0	0.000464684	0	0	0.000464684	40.5	40.5	40.5	100	100	100	100	100	100	PASS
RBM8A	0	0	0	2152	1	0.00743448	64598	480	0	0.000000320494276702376	0.00059067095196248	0.00007383386899531	0	0	0	0	0.00139405	0	0	0.00139405	33.33	33.3300018310547	33.33	100	100	100	96.45	96.4499969482422	96.45	PASS
RBP3	0	0	0	2152	2	0.0000464746	64598	3	0	1	1843	1	0	0	0	0	0.000464684	0.000464684	0	0.000929368	41.78	41.7799987792969	41.78	100	100	100	100	100	100	PASS
RBP4	0	0	0	0	0	0	0	0	0	0	0	1	0	0	0	0	0.000464684	0	0	0.000464684	40.64	40.6399993896484	40.64	100	100	100	100	100	100	PASS
RCBTB1	1	0.000929368	2	2152	3	0.0003717794	64598	24	1.32180313693604	0.203989916056464	375.953415292063	1	0.000262	0	0	0.000262	0.000929368	0	0	0.000929368	36.87	36.8699989318848	36.87	100	100	100	99.08	99.0800018310547	99.08	PASS
RD3	0	0	0	0	0	0	0	0	0	0	0	1	0	0	0	0	0.002323424	0	0	0.002323424	36.24	36.2400016784668	36.24	100	100	100	99.88	99.879997253418	99.88	PASS
RDH11	0	0	0	0	0	0	0	0	0	0	0	1	0	0	0	0	0.00743494	0	0	0.00743494	33.29	33.2900009155273	33.29	100	100	100	99.45	99.4499969482422	99.45	PASS
RDH12	0	0	0	2152	15	0.0004026691	64598	26	0	1	1843	1	0	0	0	0	0	0	0	0	34.05	34.0499992370606	34.05	100	100	100	100	100	100	PASS
RDX	0	0	0	0	0	0	0	0	0	0	0	1	0.000262	0	0	0.000262	0	0	0	0	36.43	36.4300003051758	36.43	100	100	100	100	100	100	PASS
REC114	0	0	0	0	0	0	0	0	0	0	0	1	0.000262	0	0	0.000262	0	0	0	0	39.23	39.2299995422363	39.23	100	100	100	100	100	100	PASS
RECQL	0	0	0	2152	2	0.0000930146	64598	6	0	1	1843	1	0	0	0	0	0	0	0	0	38.29	38.2900009155273	38.29	100	100	100	100	100	100	PASS
RECQL4	3	0.001427872	3	2152	32	0.001349012	64598	87	0.0819634746771043	0.767152720786518	1413.86246440955	1	0	0.000789	0	0.000789	0	0	0	0	46.56	46.560001373291	46.56	100	100	100	100	100	100	PASS
REEP6	0	0	0	2152	2	0.000046453	64598	3	0	1	1843	1	0	0	0	0	0	0	0	0	40.55	40.5499992370606	40.55	100	100	100	100	100	100	PASS
RELB	0	0	0	0	0	0	0	0	0	0	0	1	0.000131	0	0	0.000131	0.000929368	0	0	0.000929368	39.37	39.3699989318848	39.37	100	100	100	100	100	100	PASS
RELN	0	0	0	0	0	0	0	0	0	0	0	1	0.001321	0.000525	0	0.001846	0.015334568	0	0	0.015334568	33.84	33.8400001525879	33.84	100	100	100	99	99	99	PASS
RELT	1	0.000464684	1	2152	2	0.0003871905	64598	25	0.263206415349989	0.573526163447534	1057.00871923381	1	0	0	0	0	0	0	0	0	43.29	43.2900009155274	43.29	100	100	100	100	100	100	PASS
REN	0	0	0	2152	2	0.0000619535	64598	4	0	1	1843	1	0	0	0	0	0.00185874	0	0	0.00185874	36.27	36.2700004577637	36.27	100	100	100	100	100	100	PASS
REPS1	0	0	0	2152	1	0.000263223	64598	17	0	1	1843	1	0.000131	0	0	0.000131	0.000464684	0	0	0.000464684	39.56	39.560001373291	39.56	100	100	100	100	100	100	PASS
RETREG1	0	0	0	2152	3	0.0000465156	64598	3	0	1	1843	1	0.000787	0	0	0.000787	0	0	0	0	34.94	34.939998626709	34.94	100	100	100	100	100	100	PASS
RFC1	0	0	0	0	0	0	0	0	0	0	0	1	0.000131	0	0	0.000131	0.002788102	0	0	0.002788102	35.76	35.7599983215332	35.76	100	100	100	100	100	100	PASS
RFT1	0	0	0	2152	6	0.0001393693	64598	9	0	1	1843	1	0.000393	0	0	0.000393	0.007899624	0	0	0.007899624	37	37	37	100	100	100	100	100	100	PASS
RFWD3	0	0	0	0	0	0	0	0	0	0	0	1	0.000131	0	0	0.000131	0.008829	0	0	0.008829	36.32	36.3199996948242	36.32	100	100	100	98.65	98.6500015258789	98.65	PASS
RFX6	0	0	0	2152	2	0.0000464636	64598	3	0	1	1843	1	0	0	0	0	0.000464684	0	0	0.000464684	35.97	35.9700012207031	35.97	100	100	100	99.97	99.9700012207031	99.97	PASS
RFXANK	0	0	0	2152	5	0.000170399	64598	11	0	1	1843	1	0	0	0	0	0.00836431	0	0	0.00836431	41.82	41.8199996948242	41.82	100	100	100	100	100	100	PASS
RFXAP	1	0.000464684	1	2152	1	0.0000465059	64598	3	3.3207643094764	0.122857997716503	226.427289791516	1	0	0	0	0	0	0	0	0	40.1	40.0999984741211	40.1	100	100	100	100	100	100	PASS
RHOH	0	0	0	0	0	0	0	0	0	0	0	1	0	0	0	0	0.002323418	0	0	0.002323418	36.03	36.0299987792969	36.03	100	100	100	100	100	100	PASS
RIC1	0	0	0	0	0	0	0	0	0	0	0	1	0.000524	0.000132	0	0.000656	0.000929368	0	0	0.000929368	35.3	35.2999992370606	35.3	100	100	100	99.75	99.75	99.75	PASS
RIMS2	0	0	0	0	0	0	0	0	0	0	0	1	0.003808	0.008762	0.000131	0.012701	0.004182152	0.000464684	0.000464684	0.00511152	37.1	37.0999984741211	37.1	100	100	100	99.84	99.8399963378906	99.84	PASS
RIN2	0	0	0	2152	1	0.000242931	64598	16	0	1	1843	1	0	0.000262	0	0.000262	0.000464684	0	0	0.000464684	38.13	38.1300010681152	38.13	100	100	100	100	100	100	PASS
RINT1	0	0	0	2152	1	0.0000154895	64598	1	0	1	1843	1	0.000527	0	0	0.000527	0.00464684	0	0	0.00464684	36.85	36.8499984741211	36.85	100	100	100	100	100	100	PASS
RIPK1	0	0	0	2152	1	0.000216806	64598	14	0	1	1843	1	0.00224	0	0	0.00224	0.002323424	0	0	0.002323424	34.78	34.7799987792969	34.78	100	100	100	100	100	100	PASS
RIPK4	0	0	0	0	0	0	0	0	0	0	0	1	0	0	0	0	0.00139405	0	0	0.00139405	43.72	43.7200012207031	43.72	100	100	100	99.61	99.6100006103516	99.61	PASS
RIPOR2	0	0	0	0	0	0	0	0	0	0	0	1	0.002754	0	0	0.002754	0.000464684	0	0	0.000464684	34.38	34.3800010681152	34.38	100	100	100	99.76	99.7600021362305	99.76	PASS
RLBP1	0	0	0	2152	4	0.0001084228	64598	7	0	1	1843	1	0	0	0	0	0	0	0	0	38	38	38	100	100	100	100	100	100	PASS
RMND1	0	0	0	2152	2	0.0000309708	64598	2	0	1	1843	1	0	0	0	0	0.006040888	0	0	0.006040888	38.35	38.3499984741211	38.35	100	100	100	100	100	100	PASS
RMRP	0	0	0	2152	38	0.0027259732	64598	176	0	0.00796575361830956	14.6808839185445	0.271868220713787	0	0	0	0	0	0	0	0	48.68	48.6800003051758	48.68	100	100	100	100	100	100	PASS
RNASEH1	0	0	0	2152	1	0.0000309751	64598	2	0	1	1843	1	0	0	0	0	0	0	0	0	35.44	35.439998626709	35.44	100	100	100	98.05	98.0500030517578	98.05	PASS
RNASEH2A	1	0.000464684	1	2152	4	0.0001703649	64598	11	1.44762184073273	0.325162328663997	599.274171727747	1	0	0	0	0	0.00836431	0	0	0.00836431	40.9	40.9000015258789	40.9	100	100	100	100	100	100	PASS
RNASEH2B	1	0.00139405	3	2152	10	0.002385362	64598	154	-0.774925917838245	0.495936247834955	914.010504759821	1	0.000131	0	0	0.000131	0.000929368	0	0	0.000929368	38.98	38.9799995422363	38.98	100	100	100	100	100	100	PASS
RNASET2	0	0	0	2152	1	0.0000778041	64598	5	0	1	1843	1	0	0	0	0	0	0	0	0	46.58	46.5800018310547	46.58	100	100	100	100	100	100	PASS
RNF168	0	0	0	2152	2	0.0000309737	64598	2	0	1	1843	1	0	0.000131	0	0.000131	0.001858734	0	0	0.001858734	37.94	37.939998626709	37.94	100	100	100	97.68	97.6800003051758	97.68	PASS
RNF216	0	0	0	0	0	0	0	0	0	0	0	1	0.000537	0.000131	0	0.000668	0.000929368	0	0	0.000929368	40.72	40.7200012207031	40.72	100	100	100	99.97	99.9700012207031	99.97	PASS
RNPC3	0	0	0	2152	2	0.0000619665	64598	4	0	1	1843	1	0	0	0	0	0	0	0	0	36.09	36.0900001525879	36.09	100	100	100	100	100	100	PASS
ROBO3	0	0	0	2152	3	0.0000464602	64598	3	0	1	1843	1	0	0	0	0	0	0	0	0	39.16	39.1599998474121	39.16	100	100	100	99.58	99.5800018310547	99.58	PASS
ROGDI	0	0	0	2152	5	0.0002023213	64598	13	0	1	1843	1	0	0	0	0	0	0	0	0	42.05	42.0499992370605	42.05	100	100	100	100	100	100	PASS
ROR1	0	0	0	0	0	0	0	0	0	0	0	1	0.001704	0	0	0.001704	0.001858736	0	0	0.001858736	35.65	35.6500015258789	35.65	100	100	100	100	100	100	PASS
ROR2	0	0	0	0	0	0	0	0	0	0	0	1	0.000394	0.008217	0	0.008611	0.003252784	0.000464684	0	0.003717468	45.55	45.5499992370606	45.55	100	100	100	100	100	100	PASS
RP1L1	1	0.000464684	1	2152	9	0.0012293983	64598	79	-1.40363051930046	0.524086962322004	965.892271559453	1	0	0	0	0	0	0	0	0	37.81	37.810001373291	37.81	100	100	100	99.81	99.8099975585938	99.81	PASS
RPE65	1	0.000464684	1	2152	16	0.0005265515	64598	34	-0.1803246718414	1	1843	1	0	0.000131	0	0.000131	0	0	0	0	37.15	37.1500015258789	37.15	100	100	100	100	100	100	PASS
RPGRIP1	1	0.000464684	1	2152	17	0.0007743115	64598	50	-0.736664098253701	1	1843	1	0.003804	0.000262	0	0.004066	0.000464684	0	0	0.000464684	38.1	38.0999984741211	38.1	100	100	100	100	100	100	PASS
RPGRIP1L	1	0.000464684	1	2152	20	0.0005732389	64598	37	-0.302886543401646	1	1843	1	0.000393	0	0	0.000393	0.008829	0	0	0.008829	38.63	38.6300010681152	38.63	100	100	100	100	100	100	PASS
RPIA	0	0	0	2152	1	0.0000154861	64598	1	0	1	1843	1	0.000131	0	0	0.000131	0.001858736	0	0	0.001858736	36.27	36.2700004577637	36.27	100	100	100	96.13	96.129997253418	96.13	PASS
RRM2B	0	0	0	2152	7	0.0002788081	64598	18	0	1	1843	1	0.000131	0	0	0.000131	0.0027881	0	0	0.0027881	37.06	37.060001373291	37.06	100	100	100	100	100	100	PASS
RSPH1	1	0.000929368	2	2152	5	0.0010068768	64598	65	-0.115565292109944	1	1843	1	0	0	0	0	0	0	0	0	41.16	41.1599998474121	41.16	100	100	100	100	100	100	PASS
RSPH3	0	0	0	2152	1	0.000123904	64598	8	0	1	1843	1	0.002624	0.000394	0	0.003018	0.005576204	0	0	0.005576204	37.94	37.939998626709	37.94	100	100	100	98.4	98.4000015258789	98.4	PASS
RSPO1	0	0	0	0	0	0	0	0	0	0	0	1	0	0	0	0	0	0	0	0	37.72	37.7200012207031	37.72	100	100	100	100	100	100	PASS
RSPO2	0	0	0	0	0	0	0	0	0	0	0	1	0.000262	0	0	0.000262	0.004182152	0	0	0.004182152	40.46	40.4599990844727	40.46	100	100	100	100	100	100	PASS
RSPO4	0	0	0	2152	5	0.0003252675	64598	21	0	1	1843	1	0.000262	0	0	0.000262	0	0	0	0	37.55	37.5499992370606	37.55	100	100	100	99.82	99.8199996948242	99.82	PASS
RSPRY1	0	0	0	0	0	0	0	0	0	0	0	1	0.001049	0	0	0.001049	0.008829	0	0	0.008829	35.46	35.4599990844727	35.46	100	100	100	100	100	100	PASS
RSRC1	0	0	0	2152	1	0.0000154875	64598	1	0	1	1843	1	0.001444	0.000262	0	0.001706	0.00929368	0	0	0.00929368	37.08	37.0800018310547	37.08	100	100	100	100	100	100	PASS
RTN4IP1	0	0	0	2152	5	0.0001548693	64598	10	0	1	1843	1	0	0	0	0	0	0	0	0	34.39	34.3899993896484	34.39	100	100	100	99.9	99.9000015258789	99.9	PASS
RTTN	0	0	0	2152	8	0.0002478089	64598	16	0	1	1843	1	0.006691	0	0	0.006691	0	0	0	0	35.88	35.8800010681152	35.88	100	100	100	99.84	99.8399963378906	99.84	PASS
RUBCN	0	0	0	0	0	0	0	0	0	0	0	1	0.006693	0.000526	0	0.007219	0.004646838	0	0	0.004646838	37.05	37.0499992370605	37.05	100	100	100	100	100	100	PASS
RXYLT1	0	0	0	2152	4	0.0000929849	64598	6	0	1	1843	1	0	0	0	0	0.00557621	0	0	0.00557621	36.68	36.6800003051758	36.68	100	100	100	100	100	100	PASS
RYR1	1	0.000468165	1	2152	36	0.0011623236	64598	75	-1.31192279451149	0.522303716483087	962.60574947833	1	0.000131	0.000131	0	0.000262	0.000929368	0	0	0.000929368	37.6	37.5999984741211	37.6	100	100	100	99.16	99.1600036621094	99.16	PASS
S1PR2	0	0	0	0	0	0	0	0	0	0	0	1	0	0	0	0	0.00836431	0	0	0.00836431	42.84	42.8400001525879	42.84	100	100	100	99.97	99.9700012207031	99.97	PASS
SACS	2	0.000929368	2	2152	28	0.0005886929	64598	38	0.658734742864319	0.37118400289756	684.092117340204	1	0	0.000131	0	0.000131	0.000929368	0.000464684	0	0.001394052	36.05	36.0499992370606	36.05	100	100	100	99.96	99.9599990844727	99.96	PASS
SAG	0	0	0	2152	2	0.0003097676	64598	20	0	1	1843	1	0.001049	0	0	0.001049	0.00139405	0	0	0.00139405	40.95	40.9500007629395	40.95	100	100	100	100	100	100	PASS
SALL2	0	0	0	0	0	0	0	0	0	0	0	1	0.000131	0	0	0.000131	0	0	0.00789963	0.00789963	40.45	40.4500007629395	40.45	100	100	100	99.82	99.8199996948242	99.82	PASS
SAMD9	1	0.000464684	1	2152	3	0.0000464838	64598	3	3.32145005340297	0.122857997716503	226.427289791516	1	0	0	0	0	0.00464684	0	0	0.00464684	35.32	35.3199996948242	35.32	100	100	100	99.78	99.7799987792969	99.78	PASS
SAMHD1	1	0.000464684	1	2152	9	0.0002787638	64598	18	0.737206744452794	0.46352292409799	854.272749112596	1	0.000262	0	0	0.000262	0.000464684	0	0	0.000464684	40.22	40.2200012207031	40.22	100	100	100	100	100	100	PASS
SAR1B	0	0	0	2152	2	0.0000775256	64598	5	0	1	1843	1	0	0	0	0	0.00697026	0	0	0.00697026	35.5	35.5	35.5	100	100	100	99.88	99.879997253418	99.88	PASS
SARDH	0	0	0	0	0	0	0	0	0	0	0	1	0	0.000394	0	0.000394	0.004182152	0	0	0.004182152	39.51	39.5099983215332	39.51	100	100	100	100	100	100	PASS
SARM1	0	0	0	2152	2	0.000077432	64598	5	0	1	1843	1	0	0	0	0	0	0	0	0	38.83	38.8300018310547	38.83	100	100	100	100	100	100	PASS
SARS1	0	0	0	0	0	0	0	0	0	0	0	1	0	0	0	0	0	0	0.000464684	0.000464684	36.37	36.4499988555908	36.53	100	100	100	99.79	99.7950019836426	99.8	PASS
SARS2	0	0	0	2152	4	0.0001704192	64598	11	0	1	1843	1	0.000131	0	0	0.000131	0.000464684	0	0	0.000464684	33.5	33.5	33.5	100	100	100	99.9	99.9000015258789	99.9	PASS
SASH1	0	0	0	2152	1	0.000030977	64598	2	0	1	1843	1	0.001314	0	0	0.001314	0.008364308	0	0.000464684	0.008828992	36.59	36.5900001525879	36.59	100	100	100	99.88	99.879997253418	99.88	PASS
SASS6	0	0	0	2152	1	0.000015501	64598	1	0	1	1843	1	0.000262	0	0	0.000262	0	0	0	0	38.1	38.0999984741211	38.1	100	100	100	100	100	100	PASS
SBDS	0	0	0	2152	10	0.0049748723	64598	321	0	0.0000461771694760899	0.0851045233444337	0.00549822658487405	0	0	0	0	0.00464684	0	0	0.00464684	35.74	35.7400016784668	35.74	100	100	100	100	100	100	PASS
SBF1	1	0.000929368	2	2152	1	0.000248016	64598	16	1.90581677611738	0.113141585429588	208.51994194673	1	0	0.009015	0	0.009015	0	0	0	0	43.7	43.7000007629395	43.7	100	100	100	100	100	100	PASS
SBF2	1	0.00185874	4	2152	3	0.0000619819	64598	4	4.90633419025553	0.0000679602121839587	0.125250671055036	0.00659214058184399	0.012724	0.000658	0	0.013382	0.003717472	0.000464684	0.000464684	0.00464684	37.13	37.1300010681152	37.13	100	100	100	100	100	100	PASS
SC5D	0	0	0	2152	1	0.0000154986	64598	1	0	1	1843	1	0	0	0	0	0	0	0	0	35.86	35.8600006103516	35.86	100	100	100	99.09	99.0899963378906	99.09	PASS
SCAMP4	0	0	0	2152	1	0.000015489	64598	1	0	1	1843	1	0	0	0	0	0	0	0	0	40.62	40.6199989318848	40.62	100	100	100	100	100	100	PASS
SCAPER	0	0	0	2152	1	0.0000154909	64598	1	0	1	1843	1	0.007765	0.000525	0	0.00829	0.005576216	0	0	0.005576216	37.03	37.0299987792969	37.03	100	100	100	99.53	99.5299987792969	99.53	PASS
SCARB2	0	0	0	2152	5	0.0004182314	64598	27	0	1	1843	1	0.000393	0.000131	0	0.000524	0.007899624	0	0	0.007899624	36.46	36.4599990844727	36.46	100	100	100	100	100	100	PASS
SCARF2	0	0	0	0	0	0	0	0	0	0	0	1	0	0	0	0	0	0	0	0	43.19	43.189998626709	43.19	100	100	100	100	100	100	PASS
SCN1B	0	0	0	2152	3	0.0001393717	64598	9	0	1	1843	1	0	0	0	0	0.000464684	0	0	0.000464684	41.84	41.8400001525879	41.84	100	100	100	100	100	100	PASS
SCN4A	0	0	0	2152	8	0.000170437	64598	11	0	1	1843	1	0.000262	0	0	0.000262	0	0	0	0	41.08	41.0800018310547	41.08	100	100	100	99.37	99.370002746582	99.37	PASS
SCN5A	0	0	0	2152	16	0.0003562708	64598	23	0	1	1843	1	0.000655	0	0	0.000655	0.007899624	0	0	0.007899624	38.06	38.060001373291	38.06	100	100	100	98.88	98.879997253418	98.88	PASS
SCN9A	0	0	0	2152	7	0.0001550323	64598	10	0	1	1843	1	0.000131	0	0	0.000131	0.004646842	0	0	0.004646842	35.04	35.0400009155273	35.04	100	100	100	98.71	98.7099990844727	98.71	PASS
SCNN1A	0	0	0	2152	6	0.0004492617	64598	29	0	1	1843	1	0	0.000131	0	0.000131	0.00139405	0	0	0.00139405	38.84	38.8400001525879	38.84	100	100	100	98.14	98.1399993896484	98.14	PASS
SCNN1B	0	0	0	2152	3	0.0001083965	64598	7	0	1	1843	1	0	0	0	0	0	0	0	0	38.79	38.7900009155273	38.79	100	100	100	100	100	100	PASS
SCNN1G	0	0	0	0	0	0	0	0	0	0	0	1	0	0	0	0	0	0	0.00185874	0.00185874	39.48	39.4799995422363	39.48	100	100	100	99.86	99.8600006103516	99.86	PASS
SCO1	0	0	0	2152	4	0.0004028019	64598	26	0	1	1843	1	0.000263	0	0	0.000263	0	0	0	0	35.21	35.2099990844727	35.21	100	100	100	100	100	100	PASS
SCO2	1	0.00232342	5	2152	2	0.00041824	64598	27	2.47384701946796	0.00337908585739839	6.22765523518523	0.141537618981483	0	0	0	0	0	0	0	0	42.61	42.6100006103516	42.61	100	100	100	100	100	100	PASS
SCP2	1	0.00139405	3	2152	2	0.0001703472	64598	11	3.03273216773497	0.00933038993345287	17.1959086473536	0.307069797274172	0.003148	0	0	0.003148	0.007899628	0	0.000464684	0.008364312	36.03	36.0299987792969	36.03	100	100	100	100	100	100	PASS
SCUBE3	0	0	0	0	0	0	0	0	0	0	0	1	0	0	0	0	0.000464684	0	0	0.000464684	36.41	36.4099998474121	36.41	100	100	100	99.92	99.9199981689453	99.92	PASS
SCYL1	0	0	0	2152	4	0.0000929369	64598	6	0	1	1843	1	0	0	0	0	0	0	0	0	40.81	40.810001373291	40.81	100	100	100	100	100	100	PASS
SCYL2	0	0	0	0	0	0	0	0	0	0	0	1	0.000131	0.002494	0	0.002625	0.006040894	0	0	0.006040894	37.4	37.4000015258789	37.4	100	100	100	100	100	100	PASS
SDCCAG8	0	0	0	2152	3	0.0002478231	64598	16	0	1	1843	1	0.000788	0.001445	0	0.002233	0.000464684	0	0	0.000464684	37.61	37.6100006103516	37.61	100	100	100	100	100	100	PASS
SDHA	0	0	0	2152	12	0.00072786	64598	47	0	0.40711540692607	750.313694964746	1	0.003541	0.000262	0	0.003803	0.000464684	0	0	0.000464684	37.64	37.6399993896484	37.64	100	100	100	100	100	100	PASS
SDHAF1	0	0	0	0	0	0	0	0	0	0	0	1	0	0	0	0	0.000464684	0	0	0.000464684	40.72	40.7200012207031	40.72	100	100	100	100	100	100	PASS
SDHB	0	0	0	2152	3	0.0001084009	64598	7	0	1	1843	1	0.001312	0	0	0.001312	0.000929368	0	0	0.000929368	37.77	37.7700004577637	37.77	100	100	100	100	100	100	PASS
SDHD	0	0	0	2152	2	0.0000464554	64598	3	0	1	1843	1	0	0	0	0	0	0	0	0	38.86	38.8600006103516	38.86	100	100	100	100	100	100	PASS
SDR9C7	2	0.000929368	2	2152	4	0.0011619515	64598	75	-0.322227975789662	1	1843	1	0	0	0	0	0.00557621	0	0	0.00557621	40.01	40.0099983215332	40.01	100	100	100	100	100	100	PASS
SEC23A	0	0	0	2152	2	0.0006038913	64598	39	0	0.637984670785712	1175.80574825807	1	0.000131	0	0	0.000131	0	0	0	0	38.75	38.75	38.75	100	100	100	99.9	99.9000015258789	99.9	PASS
SEC23B	1	0.000464684	1	2152	13	0.0012237268	64598	79	-1.39695963284401	0.524086962322004	965.892271559453	1	0.000131	0	0	0.000131	0	0	0	0	38.11	38.1100006103516	38.11	100	100	100	99.97	99.9700012207031	99.97	PASS
SEC24D	0	0	0	2152	2	0.0000619665	64598	4	0	1	1843	1	0.000263	0	0	0.000263	0.006970258	0.00232342	0	0.009293678	36.1	36.0999984741211	36.1	100	100	100	98.97	98.9700012207031	98.97	PASS
SEC31A	0	0	0	0	0	0	0	0	0	0	0	1	0	0	0	0	0.011152414	0	0	0.011152414	36.16	36.1599998474121	36.16	100	100	100	100	100	100	PASS
SECISBP2	0	0	0	2152	1	0.0000464526	64598	3	0	1	1843	1	0.000131	0	0	0.000131	0.000464684	0	0	0.000464684	35.48	35.4799995422363	35.48	100	100	100	97.83	97.8300018310547	97.83	PASS
SELENBP1	0	0	0	2152	1	0.0000464554	64598	3	0	1	1843	1	0	0	0	0	0	0	0	0	37.6	37.5999984741211	37.6	100	100	100	99.77	99.7699966430664	99.77	PASS
SELENOI	0	0	0	0	0	0	0	0	0	0	0	1	0.000536	0	0	0.000536	0	0	0	0	36.97	36.9700012207031	36.97	100	100	100	99.22	99.2200012207031	99.22	PASS
SELENON	0	0	0	2152	19	0.0013431978	64598	87	0	0.119935107523202	221.040403165262	1	0	0	0	0	0	0	0	0	38.72	38.7200012207031	38.72	100	100	100	98.96	98.9599990844727	98.96	PASS
SEMA4A	0	0	0	2152	3	0.0000619479	64598	4	0	1	1843	1	0.000131	0	0	0.000131	0.000464684	0	0	0.000464684	39.1	39.0999984741211	39.1	100	100	100	98.18	98.1800003051758	98.18	PASS
SEPSECS	0	0	0	2152	3	0.0001239239	64598	8	0	1	1843	1	0	0	0	0	0.000929368	0	0	0.000929368	36.87	36.8699989318848	36.87	100	100	100	99.61	99.6100006103516	99.61	PASS
SERAC1	0	0	0	2152	7	0.0002182017	64598	14	0	1	1843	1	0.000283	0	0	0.000283	0.005576204	0	0	0.005576204	35.43	35.4300003051758	35.43	100	100	100	99.55	99.5500030517578	99.55	PASS
SERPINA1	1	0.00232342	5	2152	14	0.0034531365	64598	223	-0.571657393188296	0.569303963904332	1049.22720547568	1	0	0	0	0	0.00743494	0	0	0.00743494	37.85	37.8499984741211	37.85	100	100	100	100	100	100	PASS
SERPINB6	0	0	0	0	0	0	0	0	0	0	0	1	0.000131	0	0	0.000131	0	0	0	0	36.65	36.6500015258789	36.65	100	100	100	100	100	100	PASS
SERPINB7	0	0	0	2152	1	0.0000309818	64598	2	0	1	1843	1	0	0	0	0	0	0	0	0	34.91	34.9099998474121	34.91	100	100	100	100	100	100	PASS
SERPINB8	1	0.000929368	2	2152	2	0.0002942564	64598	19	1.65917617698053	0.145961614274758	269.007255108379	1	0.000393	0	0	0.000393	0	0	0	0	34.33	34.3300018310547	34.33	100	100	100	99.91	99.9100036621094	99.91	PASS
SERPINF1	0	0	0	2152	1	0.0000309761	64598	2	0	1	1843	1	0	0	0	0	0	0	0	0	37.53	37.5299987792969	37.53	100	100	100	100	100	100	PASS
SETX	1	0.000464684	1	2152	8	0.0002170172	64598	14	1.09844058082351	0.388362267551723	715.751659097826	1	0.001851	0.000262	0	0.002113	0.001858736	0	0	0.001858736	34.59	34.5900001525879	34.59	100	100	100	99.17	99.1699981689453	99.17	PASS
SFRP4	0	0	0	0	0	0	0	0	0	0	0	1	0	0	0	0	0.00464684	0	0	0.00464684	36.38	36.3800010681152	36.38	100	100	100	97.81	97.8099975585938	97.81	PASS
SFTPB	0	0	0	2152	2	0.0005116159	64598	33	0	0.627114656566696	1155.77231205242	1	0	0	0	0	0.001858736	0.000464684	0	0.00232342	37.25	37.25	37.25	100	100	100	100	100	100	PASS
SFXN4	0	0	0	2152	2	0.0000309736	64598	2	0	1	1843	1	0	0	0	0	0.000464684	0	0	0.000464684	38.22	38.2200012207031	38.22	100	100	100	100	100	100	PASS
SGCA	0	0	0	2152	12	0.0012390949	64598	80	0	0.188808750636387	347.974527422862	1	0	0	0	0	0.000464684	0	0	0.000464684	39.45	39.4500007629395	39.45	100	100	100	99.52	99.5199966430664	99.52	PASS
SGCB	2	0.000930233	2	2152	8	0.0005120221	64598	33	0.86138603889235	0.312105754206181	575.210905001992	1	0	0	0	0	0.001858734	0	0	0.001858734	37.25	37.25	37.25	100	100	100	100	100	100	PASS
SGCD	0	0	0	0	0	0	0	0	0	0	0	1	0.004982	0.001573	0	0.006555	0.008364312	0	0	0.008364312	34.6	34.5999984741211	34.6	100	100	100	98.25	98.25	98.25	PASS
SGCG	0	0	0	2152	8	0.0003100657	64598	20	0	1	1843	1	0	0	0	0	0.003252786	0	0	0.003252786	35.91	35.9099998474121	35.91	100	100	100	99.82	99.8199996948242	99.82	PASS
SGO1	0	0	0	2152	1	0.000263288	64598	17	0	1	1843	1	0	0	0	0	0.000464684	0	0	0.000464684	37.14	37.1399993896484	37.14	100	100	100	99.77	99.7699966430664	99.77	PASS
SGPL1	0	0	0	0	0	0	0	0	0	0	0	1	0.000131	0.003119	0	0.00325	0.000929368	0	0	0.000929368	37.25	37.25	37.25	100	100	100	99.83	99.8300018310547	99.83	PASS
SGSH	4	0.003717904	8	2152	22	0.0014868346	64598	96	1.32224535237429	0.0194495546583408	35.8455292353221	0.487779249051988	0	0	0	0	0	0	0	0	42.74	42.7400016784668	42.74	100	100	100	100	100	100	PASS
SH3PXD2B	0	0	0	2152	2	0.0000309717	64598	2	0	1	1843	1	0.001446	0.000393	0	0.001839	0.002788108	0	0	0.002788108	37.06	37.060001373291	37.06	100	100	100	99.22	99.2200012207031	99.22	PASS
SH3TC2	1	0.000929368	2	2152	16	0.0014557545	64598	94	-0.647445202471259	0.77256761414285	1423.84211286527	1	0.000656	0	0	0.000656	0.017193304	0	0	0.017193304	35.3	35.2999992370606	35.3	100	100	100	99.29	99.2900009155274	99.29	PASS
SHMT2	0	0	0	2152	1	0.0000619348	64598	4	0	1	1843	1	0	0	0	0	0.00557621	0	0	0.00557621	39.17	39.1699981689453	39.17	100	100	100	100	100	100	PASS
SHPK	0	0	0	0	0	0	0	0	0	0	0	1	0.002099	0	0	0.002099	0.000929368	0	0	0.000929368	39.09	39.0900001525879	39.09	100	100	100	100	100	100	PASS
SI	0	0	0	2152	5	0.0003726551	64598	24	0	1	1843	1	0.001849	0	0	0.001849	0.007434944	0	0	0.007434944	35.55	35.5499992370606	35.55	100	100	100	99.93	99.9300003051758	99.93	PASS
SIGMAR1	0	0	0	2152	3	0.0001703461	64598	11	0	1	1843	1	0.000143	0	0	0.000143	0	0	0	0	41.23	41.2299995422363	41.23	100	100	100	100	100	100	PASS
SIK3	0	0	0	0	0	0	0	0	0	0	0	1	0.001056	0.000131	0	0.001187	0.004182154	0	0	0.004182154	32.42	32.4199981689453	32.42	100	100	100	95.59	95.5899963378906	95.59	PASS
SIL1	0	0	0	2152	4	0.0002168013	64598	14	0	1	1843	1	0.000799	0	0	0.000799	0.011617098	0.00139405	0	0.013011148	36.96	36.9599990844727	36.96	100	100	100	100	100	100	PASS
SIPA1L3	0	0	0	0	0	0	0	0	0	0	0	1	0.000131	0	0	0.000131	0.000464684	0	0	0.000464684	42.12	42.1199989318848	42.12	100	100	100	99.91	99.9100036621094	99.91	PASS
SIX6	0	0	0	0	0	0	0	0	0	0	0	1	0	0	0	0	0.00743494	0	0	0.00743494	42.57	42.5699996948242	42.57	100	100	100	100	100	100	PASS
SKIV2L	0	0	0	2152	8	0.0004646196	64598	30	0	1	1843	1	0	0	0	0	0.000464684	0	0	0.000464684	40.58	40.5800018310547	40.58	100	100	100	100	100	100	PASS
SLC10A1	0	0	0	0	0	0	0	0	0	0	0	1	0	0	0	0	0.00743494	0	0	0.00743494	35.69	35.689998626709	35.69	100	100	100	100	100	100	PASS
SLC10A2	0	0	0	2152	1	0.0000309943	64598	2	0	1	1843	1	0	0	0	0	0	0	0	0	35.45	35.4500007629395	35.45	100	100	100	100	100	100	PASS
SLC10A7	0	0	0	0	0	0	0	0	0	0	0	1	0.008266	0.006058	0	0.014324	0.001858734	0	0	0.001858734	37	37	37	100	100	100	99.68	99.6800003051758	99.68	PASS
SLC11A2	0	0	0	2152	1	0.0000929454	64598	6	0	1	1843	1	0.000393	0	0	0.000393	0.00697026	0	0	0.00697026	37.53	37.5299987792969	37.53	100	100	100	99.02	99.0199966430664	99.02	PASS
SLC12A1	0	0	0	2152	6	0.0001858823	64598	12	0	1	1843	1	0.000262	0.000393	0	0.000655	0	0	0	0	37.78	37.7799987792969	37.78	100	100	100	99.26	99.2600021362305	99.26	PASS
SLC12A2	0	0	0	0	0	0	0	0	0	0	0	1	0.000131	0	0	0.000131	0.010687734	0	0	0.010687734	36.99	36.9900016784668	36.99	100	100	100	100	100	100	PASS
SLC12A3	4	0.001861779	4	2152	57	0.0033632248	64598	217	-0.853163382841087	0.335863051510663	618.995603934152	1	0	0	0	0	0.009293684	0	0	0.009293684	41.5	41.5	41.5	100	100	100	100	100	100	PASS
SLC12A5	0	0	0	0	0	0	0	0	0	0	0	1	0.000131	0	0	0.000131	0	0	0	0	37.92	37.9199981689453	37.92	100	100	100	100	100	100	PASS
SLC12A6	0	0	0	2152	5	0.0000929328	64598	6	0	1	1843	1	0.003803	0	0	0.003803	0	0	0	0	35.06	35.060001373291	35.06	100	100	100	98.73	98.7300033569336	98.73	PASS
SLC13A3	0	0	0	0	0	0	0	0	0	0	0	1	0.000131	0	0	0.000131	0	0	0	0	32.63	32.6300010681152	32.63	100	100	100	99.43	99.4300003051758	99.43	PASS
SLC13A5	1	0.000464684	1	2152	4	0.0002168204	64598	14	1.09974946877385	0.388362267551723	715.751659097826	1	0	0	0	0	0	0	0.000464684	0.000464684	37.2	37.2000007629395	37.2	100	100	100	100	100	100	PASS
SLC17A5	0	0	0	2152	9	0.0008364112	64598	54	0	0.42270061300172	779.037229762171	1	0.000393	0	0	0.000393	0	0	0	0	38.24	38.2400016784668	38.24	100	100	100	99.97	99.9700012207031	99.97	PASS
SLC18A2	0	0	0	2152	1	0.0000154861	64598	1	0	1	1843	1	0.000131	0	0	0.000131	0	0	0	0	39.66	39.6599998474121	39.66	100	100	100	100	100	100	PASS
SLC18A3	0	0	0	0	0	0	0	0	0	0	0	1	0	0	0	0	0.000464684	0	0	0.000464684	47.83	47.8300018310547	47.83	100	100	100	100	100	100	PASS
SLC19A1	2	0.002790264	6	2152	5	0.0007281182	64598	47	1.9381570523808	0.00701842035574735	12.9349487156424	0.253626445404752	0	0	0	0	0	0	0	0	47.43	47.4300003051758	47.43	100	100	100	100	100	100	PASS
SLC19A2	0	0	0	2152	1	0.0000154856	64598	1	0	1	1843	1	0	0	0	0	0.00185874	0.00325279	0	0.00511153	39.26	39.2599983215332	39.26	100	100	100	100	100	100	PASS
SLC19A3	0	0	0	2152	7	0.0002013795	64598	13	0	1	1843	1	0	0.000262	0	0.000262	0	0	0	0	32.97	32.9700012207031	32.97	100	100	100	98.94	98.9400024414063	98.94	PASS
SLC1A1	0	0	0	2152	1	0.0000928994	64598	6	0	1	1843	1	0.001835	0	0	0.001835	0	0	0	0	34.35	34.3499984741211	34.35	100	100	100	99.65	99.6500015258789	99.65	PASS
SLC1A4	0	0	0	2152	1	0.0000154861	64598	1	0	1	1843	1	0	0	0	0	0	0	0	0	44.94	44.939998626709	44.94	100	100	100	100	100	100	PASS
SLC22A12	0	0	0	2152	2	0.0000311258	64598	2	0	1	1843	1	0	0	0	0	0	0	0	0	42.36	42.3600006103516	42.36	100	100	100	99.56	99.5599975585938	99.56	PASS
SLC22A5	2	0.0009298	2	2152	25	0.001920606	64598	124	-1.04656925875429	0.446118532702833	822.196455771321	1	0.000269	0	0	0.000269	0.00697026	0	0	0.00697026	40.91	40.9099998474121	40.91	100	100	100	100	100	100	PASS
SLC24A1	1	0.000464684	1	2152	7	0.000526627	64598	34	-0.180531518972772	1	1843	1	0	0	0	0	0	0	0	0	37.71	37.7099990844727	37.71	100	100	100	99.32	99.3199996948242	99.32	PASS
SLC24A4	0	0	0	0	0	0	0	0	0	0	0	1	0.000131	0	0	0.000131	0.007899624	0	0	0.007899624	38.94	38.939998626709	38.94	100	100	100	99.46	99.4599990844727	99.46	PASS
SLC24A5	0	0	0	2152	1	0.0000309789	64598	2	0	1	1843	1	0.000131	0.000131	0	0.000262	0	0	0	0	36.82	36.8199996948242	36.82	100	100	100	100	100	100	PASS
SLC25A1	0	0	0	2152	4	0.0001394124	64598	9	0	1	1843	1	0	0	0	0	0.000464684	0	0	0.000464684	38.2	38.2000007629395	38.2	100	100	100	100	100	100	PASS
SLC25A10	0	0	0	0	0	0	0	0	0	0	0	1	0	0	0	0	0.000464684	0	0	0.000464684	46.49	46.4900016784668	46.49	100	100	100	100	100	100	PASS
SLC25A12	0	0	0	0	0	0	0	0	0	0	0	1	0.000131	0	0	0.000131	0.003717474	0	0	0.003717474	40.2	40.2000007629395	40.2	100	100	100	100	100	100	PASS
SLC25A13	1	0.000464684	1	2152	10	0.0002013573	64598	13	1.2064921941829	0.367981919474356	678.190677591237	1	0	0	0	0	0.00697026	0	0.000464684	0.007434944	38.17	38.1699981689453	38.17	100	100	100	100	100	100	PASS
[truncated: 465 more rows]

## Sheet: S7
Supplemental table S7: Sum of cumulative frequencies of rare (gnomAD_AF < 0.01), nonysnonymous (VEP IMPACT='HIGH' or 'MODERATE'), pathogenic or likely pathogenic ClinVar variants in POL and NFE populations in gene panels associated with Autosomal Recessive disorders.
Gene_panel	genes_in_panel	POL_SNP_cum_AF_sum	POL_SNP_cum_AC_sum	POL_SNP_cum_AN_sum_adjusted	POL_number_unique_variants_sum	gnomAD_NFE_SNP_cum_AF_sum	gnomAD_NFE_SNP_cum_AC_sum	gnomAD_NFE_SNP_cum_AN_sum_adjusted	gnomAD_NFE_number_unique_variants_sum	cum_AF_fold_change	fisher_p	fisher_p_corr	fisher_q
Chondrodysplasia punctata	3	0	0	6456	0	0.0015025928	97	193794	97	0	0	0	1
Multi-organ autoimmune diabetes	2	0	0	4304	0	0.0001241155	8	129196	8	0	0	0	1
Neurotransmitter disorders	13	0	0	27976	0	0.0037933218	245	839774	245	0	0	0	1
Amyotrophic lateral sclerosis/motor neuron disease	3	0	0	6456	0	0.0008827676	57	193794	57	0	0	0	1
Lipoprotein lipase deficiency	4	0	0	8608	0	0.000216863	14	258392	14	0	0	0	1
Severe hypertriglyceridaemia	4	0	0	8608	0	0.000216863	14	258392	14	0	0	0	1
Paroxysmal central nervous system disorders	4	0	0	8608	0	0.0000464891	3	258392	3	0	0	0	1
Pulmonary arterial hypertension	1	0	0	2152	0	0	0	64598	0	0	0	0	1
Mitochondrial disorder with complex V deficiency	3	0	0	6456	0	0.000185943	12	193794	12	0	0	0	1
Osteopetrosis	10	0	0	21520	0	0.0008982297	58	645980	58	0	0	0	1
Viral resistance	2	0	0	4304	0	0.0000309943	2	129196	2	0	0	0	1
Stickler syndrome	4	0	0	8608	0	0.0000155198	1	258392	1	0	0	0	1
Cerebral folate deficiency	4	0	0	8608	0	0.0009272007	60	258392	60	0	0	0	1
Beckwith-Wiedemann syndrome (BWS) and other congenital overgrowth disorders	1	0	0	2152	0	0.0000774281	5	64598	5	0	0	0	1
Dilated cardiomyopathy - adult and teen	1	0	0	2152	0	0.0000309895	2	64598	2	0	0	0	1
Non-syndromic hypotrichosis	4	0	0	8608	0	0.000309768	20	258392	20	0	0	0	1
Familial Hirschsprung Disease	3	0	0	6456	0	0.0002015756	13	193794	13	0	0	0	1
Dilated Cardiomyopathy and conduction defects	7	0	0	15064	0	0.001099627	71	452186	71	0	0	0	1
Familial tumoral calcinosis	2	0	0	4304	0	0.0001858739	12	129196	12	0	0	0	1
Amyloidosis	1	0	0	2152	0	0	0	64598	0	0	0	0	1
VACTERL-like phenotypes	4	0	0	8608	0	0.0001859206	12	258392	12	0	0	0	1
Periodic fever syndromes	6	0	0	12912	0	0.0008054794	52	387588	52	0	0	0	1
Generalised pustular psoriasis	1	0	0	2152	0	0	0	64598	0	0	0	0	1
Long QT syndrome	2	0	0	4304	0	0.000495711	32	129196	32	0	0	0	1
Familial hypercholesterolaemia - targeted panel	1	0	0	2152	0	0.0001242023	8	64598	8	0	0	0	1
Combined factor V and VIII deficiency	2	0	0	4304	0	0.0000154866	1	129196	1	0	0	0	1
Genomic imprinting	5	0	0	10760	0	0.0000619694	4	322990	4	0	0	0	1
Congenital fibrosis of the extraocular muscles	1	0	0	2152	0	0	0	64598	0	0	0	0	1
Mitochondrial disorder with complex II deficiency	3	0	0	6456	0	0.0007743154	50	193794	50	0	0	0	1
Hyperthyroidism	1	0	0	2152	0	0.0000464526	3	64598	3	0	0	0	1
Familial hypoparathyroidism	1	0	0	2152	0	0.0000464569	3	64598	3	0	0	0	1
Early onset dementia (encompassing fronto-temporal dementia and prion disease)	1	0	0	2152	0	0	0	64598	0	0	0	0	1
Hydroa vacciniforme	1	0	0	2152	0	0	0	64598	0	0	0	0	1
Hereditary Erythrocytosis	1	0	0	2152	0	0.0000464593	3	64598	3	0	0	0	1
Hypotonic infant	1342	0.48904307	1052	2887984	1052	0.633227235	40905	86690516	40884	-0.372761778030975	0.00000000000000000674934466440118	0.00000000000000167383747677149	0.00000000000000144435975818185
Neuromuscular disorders	158	0.060412822	130	340016	130	0.1184821537	7654	10206484	7656	-0.971743086110468	0.000000000000000022353544205841	0.00000000000000554367896304858	0.00000000000000239182923002499
Paediatric disorders	2415	1.09847992	2364	5197080	2363	1.2759208707	82422	156004170	82367	-0.216030361859468	0.000000000000222975831371098	0.0000000000552980061800323	0.0000000000159056093044716
Peeling skin syndrome	5	0.018122652	39	10760	39	0.0045380025	293	322990	293	1.99766478043225	0.00000000000584581954486798	0.00000000144976324712726	0.000000000312751345650437
Limb girdle muscular dystrophy	32	0.015800557	34	68864	34	0.0396644381	2562	2067136	2563	-1.32787069434886	0.000000000719863237799484	0.000000178526082974272	0.0000000308101465778179
Epidermolysis bullosa	12	0.018587336	40	25824	40	0.0069242152	447	775176	447	1.42459754461447	0.000000108567683135339	0.0000269247854175641	0.00000387224736516043
White matter disorders - childhood onset	1448	0.516006464	1110	3116096	1110	0.6022723716	38906	93537904	38877	-0.223026940461866	0.000000203361634254739	0.0000504336852951754	0.00000621705567578775
Epidermolysis bullosa and congenital skin fragility	20	0.020910756	45	43040	45	0.0086148041	556	1291960	556	1.27935532639265	0.000000320639121929067	0.0000795185022384086	0.00000857709651160254
Fetal anomalies	564	0.267912833	577	1213728	576	0.3287392056	21236	36433272	21223	-0.295179835406977	0.000000676060667414987	0.000167663045518917	0.0000160752203140897
Rhabdomyolysis and metabolic muscle disorders	35	0.021841014	47	75320	47	0.0419445412	2710	2260930	2710	-0.941443228850256	0.00000108497089405751	0.000269072781726262	0.0000232183771328307
Hydrocephalus	39	0.008829862	19	83928	19	0.0230871066	1491	2519322	1491	-1.38662458256777	0.00000177231273243142	0.000439533557642991	0.0000344795386127567
Fetal hydrops	38	0.014405638	31	81776	31	0.0311491992	2012	2454724	2011	-1.11256151786138	0.00000225263441704438	0.000558653335427007	0.0000401719804372915
Hyperammonaemia	40	0.0190529	41	86080	41	0.0359803447	2324	2583920	2323	-0.917198404136097	0.0000114501432662914	0.00283963553004026	0.000188486973768181
Intellectual disability	621	0.204608283	440	1336392	440	0.2486466699	16062	40115358	16050	-0.281232559618657	0.0000338599225667023	0.00839726079654217	0.000517573102091021
Malformations of cortical development	39	0.00929455	20	83928	20	0.0203332571	1313	2519322	1313	-1.12938440982957	0.000130512033502876	0.0323669843087133	0.00183118931279644
Inborn errors of metabolism	563	0.224021965	482	1211576	482	0.2660984114	17189	36368674	17178	-0.24831970434805	0.000136911350489453	0.0339540149213844	0.00183118931279644
Rare anaemia	41	0.006971124	15	88232	15	0.0168698126	1090	2648518	1089	-1.27498075225646	0.000157318007158105	0.0390148657752101	0.00198035609010791
Cardiomyopathies - including childhood onset	68	0.022770819	49	146336	49	0.0377879431	2441	4392664	2440	-0.730739808995983	0.000174807319522092	0.0433522152414787	0.00207826479876264
Optic neuropathy	10	0.004668142	10	21520	10	0.001053225	68	645980	68	2.14803477538301	0.000205565635212832	0.0509802775327823	0.002315318207134
Autosomal recessive primary hypertrophic osteoarthropathy	2	0.002788104	6	4304	6	0.0003717868	24	129196	24	2.90673692214188	0.000341102256558305	0.0845933596264596	0.00350535938485118
Mitochondrial disorder with complex I deficiency	27	0.001394052	3	58104	3	0.0072803439	470	1744146	470	-2.38472222364083	0.000343983864868573	0.0853079984874062	0.00350535938485118
DDG2P	704	0.322600424	694	1515008	694	0.3688148632	23825	45476992	23808	-0.19314846273955	0.000419966766916283	0.104151758195238	0.00408513127818566
Thrombophilia	6	0.000464684	1	12912	1	0.0050958435	329	387588	329	-3.45499909528904	0.00046044301247445	0.114189867093664	0.00428412194215358
Possible mitochondrial disorder - nuclear genes	191	0.03532164	76	411032	76	0.0517690454	3344	12338218	3341	-0.551537386202109	0.00057518604685818	0.142646139620829	0.0051287422511521
Arthrogryposis	89	0.022771246	49	191528	49	0.0364714422	2356	5749222	2355	-0.679554014468874	0.000632705893804206	0.156911061663443	0.005415962450964
Palmoplantar keratoderma and erythrokeratodermas	14	0.009758372	21	30128	21	0.0042747938	276	904372	276	1.1907856499669	0.000814881714457041	0.202090665185346	0.00670710334206949
Undiagnosed metabolic disorders	516	0.22215887	478	1110432	478	0.2585292619	16700	33332568	16690	-0.218735838610131	0.00087554969132382	0.217136323448307	0.00684125071834483
Nephrocalcinosis or nephrolithiasis	21	0.006970258	15	45192	15	0.0153834959	994	1356558	994	-1.14209943035488	0.00089511691641895	0.2219889952719	0.00684125071834483
Thoracic aortic aneurysm and dissection	5	0.004646844	10	10760	10	0.0015334523	99	322990	99	1.59946792227417	0.00283361825352151	0.702737326873335	0.0209101484915036
GI tract tumours	6	0.00418302	9	12912	9	0.0103032797	666	387588	665	-1.30048684262544	0.00301837509128305	0.748557022638196	0.0215310756511524
IUGR and IGF abnormalities	44	0.048810512	105	94688	105	0.0360447025	2328	2842312	2327	0.437404643271174	0.00334880927798281	0.830504700939737	0.0231175866286555
Childhood onset dystonia or chorea or related movement disorder	93	0.032064922	69	200136	69	0.0452095016	2920	6007614	2918	-0.49563011540999	0.00367267427705524	0.910823220709699	0.0245610092278069
Lysosomal storage disorder	46	0.026955567	58	98992	58	0.0389988681	2519	2971508	2518	-0.532848995493786	0.00435000361123287	1.07880089558575	0.0276384679286065
Ophthalmological ciliopathies	54	0.041358646	89	116208	89	0.0556882985	3597	3488292	3595	-0.429185257757971	0.00439115845594683	1.08900729707481	0.0276384679286065
Skeletal Muscle Channelopathies	2	0.000929368	2	4304	2	0.0047857733	309	129196	309	-2.36443018271906	0.00539923434594282	1.33901011779382	0.0320954486119934
Skeletal muscle channelopathy	2	0.000929368	2	4304	2	0.0047857733	309	129196	309	-2.36443018271906	0.00539923434594282	1.33901011779382	0.0320954486119934
Pyruvate dehydrogenase (PDH) deficiency	23	0.001394484	3	49496	3	0.005498595	355	1485754	355	-1.97933164725198	0.00628171001072979	1.55786408266099	0.0362878556498972
Rare multisystem ciliopathy Super panel	191	0.187736822	404	411032	404	0.2151917454	13901	12338218	13893	-0.196911095469434	0.00644363791914063	1.59802220394688	0.0362878556498972
Respiratory ciliopathies including non-CF bronchiectasis	39	0.021377146	46	83928	46	0.031440217	2031	2519322	2030	-0.55654191915928	0.00744908212459877	1.8473723669005	0.0402557533836938
Hereditary ataxia and cerebellar anomalies - childhood onset	211	0.105026012	226	454072	226	0.1254711813	8105	13630178	8101	-0.256609351239343	0.00760020804626906	1.88485159547473	0.0402557533836938
Retinal disorders	135	0.056697945	122	290520	122	0.0721301847	4659	8720730	4655	-0.347306671984943	0.00771255088192263	1.91271261871681	0.0402557533836938
Colorectal cancer pertinent cancer susceptibility	2	0.003718336	8	4304	8	0.0088889847	574	129196	574	-1.25736150140898	0.00902475681189842	2.23813968935081	0.0439522662838934
Inherited polyposis	2	0.003718336	8	4304	8	0.0088889847	574	129196	574	-1.25736150140898	0.00902475681189842	2.23813968935081	0.0439522662838934
Mitochondrial disorders	156	0.029745432	64	335712	64	0.0410823597	2654	10077288	2651	-0.465850918910885	0.00903691456304351	2.24115481163479	0.0439522662838934
Cerebellar hypoplasia	33	0.005112392	11	71016	11	0.0106196182	686	2131734	686	-1.05466153247538	0.00982358330303654	2.43624865915306	0.0467165961522182
Additional findings health related	1	0.003718336	8	2152	8	0.0085482395	552	64598	552	-1.20097018682019	0.011262978819393	2.79321874720947	0.0478090553929061
Additional findings health related - adults	1	0.003718336	8	2152	8	0.0085482395	552	64598	552	-1.20097018682019	0.011262978819393	2.79321874720947	0.0478090553929061
Additional findings health related - adult specific	1	0.003718336	8	2152	8	0.0085482395	552	64598	552	-1.20097018682019	0.011262978819393	2.79321874720947	0.0478090553929061
Additional findings health related - CNV analysis adults	1	0.003718336	8	2152	8	0.0085482395	552	64598	552	-1.20097018682019	0.011262978819393	2.79321874720947	0.0478090553929061
Additional findings health related - CNV analysis adult specific	1	0.003718336	8	2152	8	0.0085482395	552	64598	552	-1.20097018682019	0.011262978819393	2.79321874720947	0.0478090553929061
Ataxia and cerebellar anomalies - narrow panel	100	0.029278559	63	215200	63	0.0401372734	2593	6459800	2591	-0.455098064671386	0.0113937468459729	2.82564921780129	0.0478090553929061
Ectodermal dysplasia	16	0.001858736	4	34432	4	0.0057614321	372	1033568	372	-1.63210558620875	0.0122642884105878	3.04154352582577	0.0504722638435727
Proteinuric renal disease	31	0.017660157	38	66712	38	0.0114989116	743	2002538	742	0.619000855669569	0.0144179076182264	3.57564108932015	0.0582157024584991
Primary immunodeficiency	190	0.06069468	131	408880	131	0.0486776838	3144	12273620	3142	0.318309544334233	0.015191963108842	3.76760685099282	0.0602051871350405
Skeletal dysplasia	221	0.082311544	177	475592	177	0.0988111801	6383	14276158	6379	-0.263579506952538	0.0157844665486434	3.91454770406358	0.0614159243892672
Diabetes with additional phenotypes suggestive of a monogenic aetiology	23	0.000464684	1	49496	1	0.0031462112	203	1485754	203	-2.75929364381803	0.0165709058769006	4.10958465747134	0.0633245331724415
Adult solid tumours for rare disease	3	0.005577072	12	6456	12	0.0107013052	691	193794	691	-0.940206966318257	0.0183104069478018	4.54098092305484	0.0687443348566593
Hereditary ataxia - adult onset	116	0.035783699	77	249632	77	0.0467749934	3022	7493368	3019	-0.386434921841809	0.0191446138987096	4.74786424687997	0.0706370236952387
Xeroderma pigmentosum, Trichothiodystrophy or Cockayne syndrome	13	0.00883681	19	27976	19	0.0049731457	321	839774	321	0.829366966215389	0.0201049355262769	4.98602401051668	0.07292298648514
Glycogen storage disease	23	0.019516722	42	49496	42	0.0278575872	1800	1485754	1799	-0.513359548411922	0.0206331828827505	5.11702935492212	0.0735916856151434
White matter disorders and cerebral calcification - narrow panel	108	0.057630784	124	232416	124	0.0464449306	3000	6976584	2998	0.311318509020743	0.0224342110211178	5.56368433323721	0.0787036255494952
Pancreatitis	1	0.014869842	32	2152	32	0.0221261638	1429	64598	1429	-0.573364022521435	0.0242361856948065	6.01057405231201	0.081659855642555
Peroxisomal disorders	17	0.006505574	14	36584	14	0.0117210277	757	1098166	757	-0.849350811259382	0.0242850948332035	6.02270351863447	0.081659855642555
Cytopenia - NOT Fanconi anaemia	16	0.006505574	14	34432	14	0.0118213003	764	1033568	763	-0.861640475862773	0.024656623814962	6.11484270611058	0.081659855642555
Non-CF bronchiectasis	2	0.014869842	32	4304	32	0.0221261638	1429	129196	1429	-0.573364022521435	0.0250336388632435	6.20834243808438	0.081659855642555
Thoracic dystrophies	20	0.005112386	11	43040	11	0.0098687309	638	1291960	637	-0.948867800709618	0.0254042810031974	6.30026168879295	0.081659855642555
Epidermodysplasia verruciformis	3	0.000929368	2	6456	2	0.0000929339	6	193794	6	3.32197311344724	0.0255664034021083	6.34046804372287	0.081659855642555
Distal myopathies	6	0.002788102	6	12912	6	0.0065104466	421	387588	421	-1.22347317021187	0.0277677060327617	6.8863910961249	0.0873866042795736
Multiple Epiphyseal Dysplasia	1	0.005112817	11	2152	11	0.0025259415	163	64598	163	1.0172971622734	0.0294623946008737	7.30667386101668	0.0901060636517928
Ectodermal dysplasia without a known gene mutation	12	0.001858736	4	25824	4	0.0051109767	330	775176	330	-1.45927713843332	0.0294739460543248	7.30953862147254	0.0901060636517928
Hereditary neuropathy NOT PMP22 copy number	36	0.016730362	36	77472	36	0.0114472844	739	2325528	739	0.547463268434984	0.0319011199537025	7.91147774851823	0.0961526714097513
Surfactant deficiency	2	0.00232342	5	4304	5	0.0056220968	363	129196	363	-1.27485832310471	0.037843912834897	9.38529038305446	0.110606111604574
Rare multisystem ciliopathy disorders	89	0.06877501	148	191528	148	0.0818657643	5288	5749222	5285	-0.251375808521557	0.0379127151114671	9.40235334764384	0.110606111604574
Holoprosencephaly	1	0.014869904	32	2152	32	0.0101287216	654	64598	654	0.553943238000895	0.0382469731716753	9.48524934657546	0.110606111604574
Congenital muscular dystrophy	26	0.005113259	11	55952	11	0.0094378993	610	1679548	610	-0.884222674196242	0.0398885950337186	9.89237156836222	0.113815457829544
Severe early-onset obesity	21	0.00371747	8	45192	8	0.007545253	487	1356558	487	-1.02124817682463	0.040813126878285	10.1216554658147	0.114282330143366
Familial pulmonary fibrosis	13	0.003717904	8	27976	8	0.0076048641	491	839774	491	-1.03243294810578	0.0411202776684073	10.197828861765	0.114282330143366
Hereditary neuropathy	84	0.051583824	111	180768	111	0.0423804826	2738	5426232	2736	0.28351871039379	0.0493520972836617	12.2393201263481	0.135401907932098
Primary ciliary disorders	32	0.005111956	11	68864	11	0.0092677774	599	2067136	598	-0.858347974285534	0.0500125316414148	12.4031078470709	0.135476984446364
Primary lymphoedema	5	0.003717476	8	10760	8	0.0073556058	475	322990	475	-0.984520736949536	0.0519167178803823	12.8753460343348	0.138783137023402
Mitochondrial DNA maintenance disorder	18	0.003717472	8	38736	8	0.0074179991	479	1162764	479	-0.996708216864547	0.0525300658826896	13.027456338907	0.138783137023402
Intestinal failure	10	0.003717468	8	21520	8	0.0016883436	109	645980	109	1.13871178236683	0.0577035585451086	14.3104825191869	0.150592213764064
Mitochondrial liver disease	6	0.002788102	6	12912	6	0.0059620144	385	387588	385	-1.09651651809498	0.0610229410714299	15.1336893857146	0.155588719082357
Hereditary spastic paraplegia - childhood onset	44	0.018728666	40	94688	40	0.0136167835	880	2842312	879	0.459862187208373	0.0610722074902708	15.1459074575872	0.155588719082357
Childhood solid tumours cancer susceptibility	33	0.033964	73	71016	73	0.0269903467	1744	2131734	1742	0.331562868806184	0.0623505023172879	15.4629245746874	0.15697655877529
Congenital hyperinsulinism	2	0.003717476	8	4304	8	0.0070768611	457	129196	457	-0.928786175023662	0.0652345334278941	16.1781642901177	0.162327792483364
Familial diabetes	24	0.000464684	1	51648	1	0.0024351665	157	1550352	157	-2.38969854134261	0.0682094591601109	16.9159458717075	0.167779589198434
Hypophosphataemia or rickets	7	0.000929368	2	15064	2	0.0031366967	203	452186	203	-1.75492415991733	0.0725490992616405	17.9921766168868	0.176426218658989
Thoracic aortic aneurysm or dissection	5	0.000932849	2	10760	2	0.0032704667	211	322990	211	-1.80978104848231	0.0755116972037528	18.7269009065307	0.181567451703406
Hereditary spastic paraplegia - adult onset	46	0.018728666	40	98992	40	0.0137871533	891	2971508	890	0.441923535975007	0.0767127896650953	19.0247718369436	0.182405966537004
Limb disorders	61	0.03070817	66	131272	66	0.0383101098	2475	3940478	2473	-0.319102620680319	0.0811884705000428	20.1347406840106	0.187233213644263
Genetic epilepsy syndromes	219	0.083646998	180	471288	180	0.0955760863	6174	14146962	6170	-0.192335928123266	0.081621518211663	20.2421365164924	0.187233213644263
Clefting	48	0.045563344	98	103296	98	0.0380025406	2455	3100704	2454	0.261777762797769	0.0820605260734634	20.3510104662189	0.187233213644263
Radial dysplasia	20	0.019086298	41	43040	41	0.0251102417	1622	1291960	1621	-0.39573861230574	0.0822426265540219	20.3961713853974	0.187233213644263
Growth failure in early childhood	22	0.023699322	51	47344	51	0.0184798091	1194	1421156	1193	0.358895932985516	0.0910155529394758	22.57185712899	0.201570542577677
Bardet Biedl syndrome	15	0.003252788	7	32280	7	0.0061812021	399	968970	399	-0.926210638039095	0.0912877826423452	22.6393700953016	0.201570542577677
Amelogenesis imperfecta	23	0.003252788	7	49496	7	0.0061973384	400	1485754	400	-0.929971949507876	0.0913660870562369	22.6587895899468	0.201570542577677
Tumour predisposition - childhood onset	35	0.033499316	72	75320	72	0.0272227728	1759	2260930	1757	0.299317617124868	0.0973797072463936	24.1501673971056	0.212645483170696
Hereditary spastic paraplegia	45	0.0205874	44	96840	44	0.0158010132	1021	2906910	1020	0.381744571770017	0.0985868489637059	24.4495385429991	0.213106926042758
Gastrointestinal neuromuscular disorders	6	0.002788104	6	12912	6	0.0055440987	358	387588	358	-0.991668564929654	0.100643646052668	24.9596242210616	0.213664096627034
Cerebral malformations	40	0.024164454	52	86080	52	0.0304619787	1968	2583920	1967	-0.334123259931699	0.101285147778139	25.1187166489784	0.213664096627034
Infantile nystagmus	6	0.0009298	2	12912	2	0.0030358894	196	387588	196	-1.70712690214948	0.101839896523166	25.2562943377451	0.213664096627034
Unexplained kidney failure in young people	48	0.025560215	55	103296	55	0.0204384131	1320	3100704	1319	0.32261678614722	0.108227150302621	26.8403332750499	0.224860292861756
Cytopenias and congenital anaemias	60	0.030205754	65	129120	65	0.0370691868	2395	3875880	2393	-0.295397066820335	0.109584720593384	27.1770107071592	0.225491636605617
Hereditary ataxia	83	0.026954703	58	178616	58	0.0334514141	2161	5361634	2159	-0.311530186221941	0.117564498937632	29.1559957365327	0.23960764545384
Ichthyosis and erythrokeratoderma	27	0.013475844	29	58104	29	0.0100890558	652	1744146	651	0.417584468743112	0.127986926205117	31.7407576988691	0.258309194323167
Laterality disorders and isomerism	23	0.004647704	10	49496	10	0.00762622	493	1485754	492	-0.714449960075856	0.129154597161583	32.0303400960727	0.258309194323167
Severe Paediatric Disorders	1402	0.582472322	1253	3017104	1253	0.608070074	39280	90566396	39254	-0.0620480922228306	0.1323748753975	32.82896909858	0.262298364213565
Vici Syndrome and other autophagy disorders	10	0.000464684	1	21520	1	0.001998305	129	645980	129	-2.10445492160834	0.135437483150681	33.5884958213688	0.265342439980922
Monogenic diabetes	12	0.000464684	1	25824	1	0.0020475177	132	775176	132	-2.13955404752259	0.136390973821969	33.8249615078483	0.265342439980922
Confirmed Fanconi anaemia or Bloom syndrome	17	0.022305266	48	36584	48	0.0178137031	1151	1098166	1150	0.324396898939383	0.139861860811928	34.6857414813581	0.268893749005118
Deafness and congenital structural abnormalities	16	0.012565142	27	34432	27	0.0093399881	603	1033568	603	0.427934358436918	0.14072943873165	34.9009008054493	0.268893749005118
Haematuria	2	0.002789403	6	4304	6	0.0014559813	94	129196	94	0.937964557009889	0.142389739379688	35.3126553661627	0.269658444488967
Hypogonadotropic hypogonadism idiopathic	10	0.00418215	9	21520	9	0.0070019048	452	645980	452	-0.743502638991318	0.145057487019142	35.9742567807473	0.272300896685057
Cystic renal disease	84	0.070633746	152	180768	152	0.0794600795	5133	5426232	5129	-0.169872626224453	0.160635961354332	39.8377184158742	0.298922571563713
Congenital myaesthenic syndrome	20	0.005111522	11	43040	11	0.0080015336	517	1291960	517	-0.646523608044839	0.173050119418449	42.9164296157753	0.316522047037867
Autosomal recessive congenital ichthyosis	13	0.012081792	26	27976	26	0.0092349855	597	839774	596	0.387652853355408	0.173051773380516	42.916839798368	0.316522047037867
COVID-19 research	292	0.119747658	258	628384	258	0.1100881066	7111	18862616	7108	0.121338824954596	0.176261505655023	43.7128534024457	0.319660696696398
Structural basal ganglia disorders	42	0.016263942	35	90384	35	0.0205785598	1329	2713116	1328	-0.339465042679844	0.191751080598074	47.5542679883223	0.344829674352838
Renal superpanel - broad	366	0.239327099	515	787632	515	0.2535910299	16381	23642868	16370	-0.083519952486324	0.198712159114453	49.2806154603844	0.354370017087441
Paediatric motor neuronopathies	9	0.002788104	6	19368	6	0.0048474407	313	581382	313	-0.797938872916825	0.204757485513534	50.7798564073564	0.360338593424232
Renal superpanel - narrow	189	0.129190883	278	406728	278	0.1398063018	9031	12209022	9025	-0.113925129335438	0.206801156941256	51.2866869214315	0.360338593424232
Unexplained paediatric onset end-stage renal disease	125	0.084111317	181	269000	181	0.0928352194	5997	8074750	5993	-0.142372307121179	0.207110499958788	51.3634039897794	0.360338593424232
Groopman et al 2019 - Genes with diagnostic variants	7	0.023702377	51	15064	51	0.019889144	1285	452186	1284	0.253050561485199	0.214290182635027	53.1439652934866	0.369823379708836
Pain syndromes	7	0.001395786	3	15064	3	0.0007465768	48	452186	48	0.902715184013864	0.226562226966761	56.1874322877568	0.387874532567095
Primary ovarian insufficiency	20	0.009293682	20	43040	20	0.0123425187	797	1291960	797	-0.409314644483209	0.2343961411685	58.130243009788	0.398101382619516
Intracerebral calcification disorders	14	0.00604089	13	30128	13	0.0043989874	284	904372	284	0.457589647488203	0.247984591262161	61.5001786330159	0.417863799449625
Renal ciliopathies	69	0.063663056	137	148488	137	0.0704540055	4551	4457262	4548	-0.146225318040414	0.263812638700038	65.4255343976095	0.441061755326627
Severe microcephaly	67	0.048817461	105	144184	105	0.0436877125	2822	4328066	2820	0.160169694515545	0.271277165691392	67.2767370914652	0.450025685720604
Albinism or congenital nystagmus	15	0.003253652	7	32280	7	0.0051120299	330	968970	330	-0.651836321250309	0.280476989851405	69.5582934831484	0.461708275601543
Congenital disorders of glycosylation	71	0.020913821	45	152792	45	0.0248090027	1603	4586458	1602	-0.246407071838784	0.294825381963468	73.1166947269401	0.478481782609436
Ocular and oculo-cutaneous albinism	10	0.002324284	5	21520	5	0.0040741557	263	645980	263	-0.809714756347921	0.295138295815166	73.1942973621613	0.478481782609436
Brain channelopathy	4	0.00697026	15	8608	15	0.0054358486	351	258392	351	0.358707197022816	0.301630990399141	74.804485618987	0.485331067258769
Neurological ciliopathies	40	0.054833632	118	86080	118	0.0605249052	3910	2583920	3908	-0.14246787834758	0.304654919964182	75.5544201511172	0.486538454271156
Ocular coloboma	11	0.002788104	6	23672	6	0.0044625088	288	710578	288	-0.678570637457011	0.320400992415261	79.4594461189847	0.507894906495303
Cholestasis	28	0.02416443	52	60256	52	0.0211436114	1366	1808744	1365	0.192663149376894	0.328212932782882	81.3968073301547	0.516452703055417
Tubulointerstitial kidney disease	11	0.00325322	7	23672	7	0.0048700891	315	710578	314	-0.582079778791798	0.344692892884436	85.4838374353401	0.538425394724593
Haematological malignancies cancer susceptibility	37	0.027881474	60	79624	60	0.0317155171	2049	2390126	2047	-0.185882030857213	0.354800135448254	87.9904335911669	0.55019731149222
Familial Tumours Syndromes of the central & peripheral Nervous system	4	0.000464684	1	8608	1	0.001414295	91	258392	91	-1.60576119940449	0.375512768833207	93.1271666706353	0.578127572160477
Corneal dystrophies	7	0.001394052	3	15064	3	0.0027140904	175	452186	175	-0.961184397692442	0.389632740058829	96.6289195345896	0.594218788873333
Inherited white matter disorders	101	0.04600587	99	217352	99	0.0420919741	2719	6524398	2717	0.12827277665917	0.393024845997242	97.470161807316	0.594218788873333
Vascular skin disorders	4	0.00371747	8	8608	8	0.0026950158	174	258392	174	0.464027368715272	0.394294710373894	97.7850881727257	0.594218788873333
Ehlers Danlos syndromes	20	0.005578381	12	43040	12	0.0042883844	277	1291960	277	0.379412241767894	0.400850068118473	99.4108168933814	0.59987352851296
Cystic kidney disease	15	0.00697069	15	32280	15	0.009006074	582	968970	581	-0.369596862263134	0.415419816342068	103.024114452833	0.617360004841685
ClinGen Gene Validity Curations	17	0.010223911	22	36584	22	0.0124611585	805	1098166	804	-0.285491017673808	0.429820610663997	106.595511444671	0.629275241903112
Palmoplantar keratodermas	34	0.014405212	31	73168	31	0.0124106766	802	2196332	801	0.215009122797912	0.431184510596793	106.933758628005	0.629275241903112
Mitochondrial disorder with complex IV deficiency	17	0.00418216	9	36584	9	0.0031596226	204	1098166	204	0.404496010742631	0.432259161494194	107.20027205056	0.629275241903112
Familial hypercholesterolaemia	5	0.00418216	9	10760	9	0.0032212876	208	322990	208	0.37661078541229	0.436973806049543	108.369503900287	0.631746143623642
Osteogenesis imperfecta	24	0.005578373	12	51648	12	0.0073757217	476	1550352	476	-0.40293981723218	0.439860632709919	109.08543691206	0.631746143623642
Familial rhabdomyosarcoma	6	0.000929368	2	12912	2	0.0019409469	125	387588	125	-1.06243877371742	0.447134467368034	110.889347907272	0.637911840111728
Paediatric disorders - additional genes	6	0.000929368	2	12912	2	0.0020453503	132	387588	132	-1.13802607372822	0.454878559251104	112.809882694274	0.642815040326449
Cataracts	59	0.039506414	85	126968	85	0.0365343273	2360	3811282	2359	0.112834255224236	0.456732363268421	113.269626090569	0.642815040326449
Congenital hypothyroidism	15	0.012086114	26	32280	26	0.0143927712	930	968970	929	-0.25199394174937	0.462565155222838	114.716158495264	0.642815040326449
Choanal atresia	4	0.00420168	9	8608	9	0.0055687732	360	258392	360	-0.406393246518865	0.462586524347071	114.721458038074	0.642815040326449
Non-acute porphyrias	3	0.001394052	3	6456	3	0.0009755804	63	193794	63	0.514951697738006	0.473378912769447	117.397970366823	0.651804705820384
Adult onset movement disorder	27	0.016728626	36	58104	36	0.0192113741	1241	1744146	1240	-0.199641756966048	0.475147355644766	117.836544199902	0.651804705820384
Corneal abnormalities	12	0.002788104	6	25824	6	0.0040616759	262	775176	262	-0.542790748222988	0.486807916075331	120.728363186682	0.663547095796949
Craniosynostosis	17	0.014440317	31	36584	31	0.0128474297	830	1098166	829	0.168622655364909	0.499143238481044	123.787523143299	0.676054766043946
CAKUT	22	0.019516746	42	47344	42	0.0175947348	1137	1421156	1136	0.149568765452106	0.508581887523017	126.128308105708	0.684506439810853
Glaucoma (developmental)	9	0.003252792	7	19368	7	0.0025720036	166	581382	166	0.338785910109727	0.51347986767575	127.343007183586	0.686779323016316
Parkinson Disease and Complex Parkinsonism	21	0.008850296	19	45192	19	0.0104759352	677	1356558	676	-0.243281428534261	0.520240156025838	129.019558694408	0.689784312899126
Atypical haemolytic uraemic syndrome	2	0.000464684	1	4304	1	0.0011614679	75	129196	75	-1.3216274063601	0.522425604232866	129.561549849751	0.689784312899126
Early onset dystonia	32	0.017214608	37	68864	37	0.0194921463	1259	2067136	1258	-0.179259626799917	0.528501248813079	131.068309705644	0.689784312899126
Cardiac arrhythmias	4	0.000464684	1	8608	1	0.0012859466	83	258392	83	-1.46850885886137	0.528710190601052	131.120127269061	0.689784312899126
Sudden cardiac death	5	0.000464684	1	10760	1	0.0013169361	85	322990	85	-1.50286346931379	0.531843044992317	131.897075158094	0.689784312899126
Pigmentary skin disorders	38	0.030704268	66	81776	66	0.0286026273	1848	2454724	1846	0.102291537031771	0.559988529504526	138.877155317122	0.721912923578124
Structural eye disease	62	0.02138416	46	133424	46	0.0236384484	1527	4005076	1525	-0.144592804585596	0.56751693089868	140.744198862873	0.725184811163851
Pneumothorax - familial	1	0.00232342	5	2152	5	0.0034531365	223	64598	223	-0.571657393188296	0.569303963904332	141.187383048274	0.725184811163851
Erythropoietic protoporphyria, mild variant	1	0.000464684	1	2152	1	0.0003871101	25	64598	25	0.263506021682992	0.573526163447534	142.234488534988	0.726240230637706
Insulin resistance (including lipodystrophy)	10	0.005111526	11	21520	11	0.0045900874	297	645980	296	0.155232434760925	0.630157911285982	156.279161998924	0.790063811122377
Sudden death in young people	2	0.001394052	3	4304	3	0.0021224241	137	129196	137	-0.606428585828653	0.633661577374053	157.148071188765	0.790063811122377
Congenital adrenal hypoplasia	8	0.001394052	3	17216	3	0.0021835456	141	516784	141	-0.647388283245027	0.635004558472191	157.481130501103	0.790063811122377
Cutaneous photosensitivity with a likely genetic cause	5	0.002821924	6	10760	6	0.0023245924	150	322990	150	0.27970136128156	0.645517783252294	160.088410246569	0.798501766566422
Severe multi-system atopic disease with high IgE	3	0.000929368	2	6456	2	0.0007146462	46	193794	46	0.37902078744302	0.668302068831332	165.73891307017	0.821934728332787
Rare genetic inflammatory skin disorders	11	0.003253652	7	23672	7	0.0028653044	185	710578	185	0.183371539267771	0.680575709965938	168.782776071553	0.832246868186919
Hearing loss	65	0.042752651	92	139880	92	0.0410977984	2655	4198870	2653	0.0569527700692433	0.705083333360953	174.860666673516	0.857317234882067
Congenital myopathy	30	0.006970264	15	64560	15	0.0080758542	522	1937940	522	-0.212401565289023	0.712960408314739	176.814181262055	0.858698991873179
Pituitary hormone deficiency	7	0.008828988	19	15064	19	0.0081169549	524	452186	524	0.121309484617192	0.71424495585713	177.132749052568	0.858698991873179
Neurodegenerative disorders - adult onset	40	0.029762382	64	86080	64	0.0285505433	1844	2583920	1843	0.0599717961163031	0.745547450923328	184.895767828985	0.891324885461409
Gastrointestinal epithelial barrier disorders	23	0.00511282	11	49496	11	0.0048483426	313	1485754	313	0.0766275879061059	0.754248635019907	187.053661484937	0.896717821634778
Non-syndromic familial congenital anorectal malformations	1	0.001427872	3	2152	3	0.001349012	87	64598	87	0.0819634746771043	0.767152720786518	190.253874755057	0.897107553269481
Sarcoma cancer susceptibility	1	0.001427872	3	2152	3	0.001349012	87	64598	87	0.0819634746771043	0.767152720786518	190.253874755057	0.897107553269481
Sarcoma susceptibility	1	0.001427872	3	2152	3	0.001349012	87	64598	87	0.0819634746771043	0.767152720786518	190.253874755057	0.897107553269481
Familial dysautonomia	9	0.00186047	4	19368	4	0.0015984793	103	581382	103	0.218967065639134	0.77981711214639	193.394643812305	0.902394130904703
Head and neck cancer pertinent cancer susceptibility	10	0.014405638	31	21520	31	0.0138478492	895	645980	894	0.0569716370271791	0.780107075782103	193.466554793962	0.902394130904703
Iron metabolism disorders	13	0.007434944	16	27976	16	0.0071566451	462	839774	462	0.0550384381548003	0.796035024904116	197.416686176221	0.913216192481865
Brain cancer pertinent cancer susceptibility	1	0.001858736	4	2152	4	0.0018123205	117	64598	117	0.0364837644441218	0.797997327075275	197.903337114668	0.913216192481865
Neonatal cholestasis	53	0.060874416	131	114056	131	0.0624937526	4037	3423694	4035	-0.0378759463428749	0.826283262669265	204.918249141978	0.940556479846929
Anophthalmia or microphthalmia	18	0.003253218	7	38736	7	0.0031008459	200	1162764	200	0.0692056700479423	0.842803872314141	209.015360333907	0.948578577127936
Mucopolysaccharideosis, Gaucher, Fabry	15	0.013012881	28	32280	28	0.0126906782	820	968970	819	0.0361712343350278	0.845790387855581	209.756016188184	0.948578577127936
Haematological malignancies for rare disease	36	0.027881474	60	77472	60	0.0289895439	1873	2325528	1871	-0.0562258016135762	0.846628543137551	209.963878698113	0.948578577127936
Inherited bleeding disorders	58	0.033924089	73	124816	73	0.0332230049	2146	3746684	2145	0.0301275082020577	0.856758327595156	212.476065243599	0.954928552632101
Renal tubulopathies	16	0.007902669	17	34432	17	0.0083815417	541	1033568	541	-0.0848756547721443	0.904831397991653	224.39818670193	1
White matter disorders - adult onset	55	0.048329292	104	118360	104	0.0491045003	3172	3552890	3170	-0.0229573896967032	0.92116595874196	228.449157768006	1
Neurofibromatosis Type 1	16	0.016264374	35	34432	35	0.0168270115	1087	1033568	1086	-0.0490636793146217	0.932566584770746	231.276513023145	1
Ketotic hypoglycaemia	25	0.022769498	49	53800	49	0.0227088185	1467	1614950	1466	0.00384983756739903	0.942033974162272	233.624425592243	1
Adult solid tumours cancer susceptibility	20	0.027425468	59	43040	59	0.0279880038	1808	1291960	1807	-0.0292923530353983	0.947701457278082	235.029961404964	1
Skeletal ciliopathies	28	0.027881488	60	60256	60	0.0285245362	1843	1808744	1842	-0.0328958708528883	0.948180770799167	235.148831158194	1
Diabetes - neonatal onset	16	0.000464684	1	34432	1	0.0006200237	40	1033568	40	-0.416073391800316	1	248	1
Inherited non-medullary thyroid cancer	1	0.000464684	1	2152	1	0.0008523552	55	64598	55	-0.875204795878784	1	248	1
Thyroid cancer pertinent cancer susceptibility	1	0.000464684	1	2152	1	0.0008523552	55	64598	55	-0.875204795878784	1	248	1
Bleeding and platelet disorders	52	0.026024463	56	111904	56	0.0261896562	1692	3359096	1691	-0.00912872645344387	1	248	1
Infantile enterocolitis & monogenic inflammatory bowel disease	17	0.002788534	6	36584	6	0.0032230946	208	1098166	208	-0.208939671532655	1	248	1
Familial non syndromic congenital heart disease	5	0.000464684	1	10760	1	0.0008833108	57	322990	57	-0.926671180212175	1	248	1
Lipodystrophy - childhood onset	5	0.000929368	2	10760	2	0.0009786894	63	322990	63	-0.074601103325599	1	248	1
Disorders of sex development	18	0.042433561	91	38736	91	0.0424198155	2740	1162764	2740	0.000467407796270787	1	248	1
Neuronal ceroid lipofuscinosis	11	0.00464684	10	23672	10	0.0048952541	316	710578	316	-0.0751337775203414	1	248	1
Mitochondrial disorder with complex III deficiency	6	0.000464684	1	12912	1	0.0007743453	50	387588	50	-0.736727072945562	1	248	1
Catecholaminergic polymorphic VT	2	0.000464684	1	4304	1	0.0007902356	51	129196	51	-0.766032870156881	1	248	1
Ductal plate malformation	4	0.003252788	7	8608	7	0.0035784554	231	258392	231	-0.137660200772034	1	248	1
Extreme early-onset hypertension	3	0.000464684	1	6456	1	0.0005110956	33	193794	33	-0.137343200465552	1	248	1
Hypogonadotropic hypogonadism	19	0.00789962	17	40888	17	0.0083031792	536	1227362	536	-0.071880578836106	1	248	1
Auditory Neuropathy Spectrum Disorder	2	0.000464684	1	4304	1	0.0008828685	57	129196	57	-0.925948598954514	1	248	1
Cerebral vascular malformations	4	0.000464684	1	8608	1	0.0007743537	50	258392	50	-0.736742723034242	1	248	1
